# Supplementary material
Source: PubMed Central journal article supplement (PMC10715732)
Supplement: NIHMS1947583-supplement-Appendix.pdf [file NIHMS1947583-supplement-Appendix.pdf]

# THE LANCET

## Neurology

### Supplementary appendix

This appendix formed part of the original submission and has been peer reviewed. We post it as supplied by the authors.

Supplement to: Feigin VL, Owolabi MO, on behalf of the World Stroke Organization–Lancet Neurology Commission Stroke Collaboration Group. Pragmatic solutions to reduce the global burden of stroke: a World Stroke Organization–Lancet Neurology Commission. *Lancet Neurol* 2023; published online Oct 9. [https://doi.org/10.1016/S1474-4422\(23\)00277-6](https://doi.org/10.1016/S1474-4422(23)00277-6).

## SUPPLEMENTARY MATERIALS – Table of Contents

|                                                                                                                                                                                |           |
|--------------------------------------------------------------------------------------------------------------------------------------------------------------------------------|-----------|
| <b>OVERVIEW OF METHODS</b> .....                                                                                                                                               | <b>4</b>  |
| PRIORITY SETTING .....                                                                                                                                                         | 5         |
| CONTEXTUALIZATION .....                                                                                                                                                        | 5         |
| SOLUTIONS AND RESEARCH GAPS .....                                                                                                                                              | 5         |
| INNOVATION .....                                                                                                                                                               | 5         |
| STRENGTHS.....                                                                                                                                                                 | 6         |
| <b>STROKE BURDEN PROJECTIONS</b> .....                                                                                                                                         | <b>6</b>  |
| METHODS USED TO FORECAST STROKE BURDEN .....                                                                                                                                   | 6         |
| <b>THEMATIC ANALYSIS METHODS</b> .....                                                                                                                                         | <b>7</b>  |
| SETTING .....                                                                                                                                                                  | 7         |
| QUALITATIVE DATA .....                                                                                                                                                         | 7         |
| PARTICIPATING COUNTRIES.....                                                                                                                                                   | 8         |
| RECRUITMENT STRATEGY .....                                                                                                                                                     | 8         |
| DATA COLLECTION.....                                                                                                                                                           | 8         |
| DATA ANALYSIS .....                                                                                                                                                            | 8         |
| FUNDING .....                                                                                                                                                                  | 8         |
| ETHICS .....                                                                                                                                                                   | 9         |
| RESULTS.....                                                                                                                                                                   | 9         |
| APPENDIX .....                                                                                                                                                                 | 9         |
| <i>Semi-structured interview guides</i> .....                                                                                                                                  | 9         |
| <i>Acute care</i> .....                                                                                                                                                        | 9         |
| <i>Prevention</i> .....                                                                                                                                                        | 11        |
| <i>Rehabilitation</i> .....                                                                                                                                                    | 13        |
| <i>Surveillance</i> .....                                                                                                                                                      | 14        |
| MODELS OF ACUTE STROKE CARE IN LMIC .....                                                                                                                                      | 16        |
| <i>India</i> .....                                                                                                                                                             | 16        |
| <i>China</i> .....                                                                                                                                                             | 16        |
| <i>Brazil</i> .....                                                                                                                                                            | 16        |
| SUPPLEMENTARY PANEL X: TELEMEDICINE FOR STROKE FROM BRAZIL TO ETHIOPIA.....                                                                                                    | 17        |
| <i>Chile</i> .....                                                                                                                                                             | 19        |
| <i>Colombia</i> .....                                                                                                                                                          | 19        |
| <i>Uruguay</i> .....                                                                                                                                                           | 20        |
| <i>Egypt</i> .....                                                                                                                                                             | 20        |
| <i>Ethiopia</i> .....                                                                                                                                                          | 21        |
| GLOBAL INITIATIVES FOR ACUTE STROKE CARE .....                                                                                                                                 | 21        |
| TELEMEDICINE FOR STROKE FROM BRAZIL TO ETHIOPIA .....                                                                                                                          | 25        |
| BARRIERS AND FACILITATORS OF REHABILITATION SERVICES.....                                                                                                                      | 26        |
| SPECIAL INTEREST GROUP CLINICAL PATHWAYS (SIG CP) OF THE WFNR ORGANIZED AN INTERNATIONAL SURVEY.....                                                                           | 27        |
| GAPS IN STROKE REHABILITATION EVIDENCE-BASE .....                                                                                                                              | 29        |
| GAP ANALYSIS OF STROKE REHABILITATION SERVICES AND SETTINGS.....                                                                                                               | 30        |
| PRAGMATIC RECOMMENDATIONS FROM GUIDELINES .....                                                                                                                                | 31        |
| <b>METHODOLOGY OF GLOBAL STROKE ECONOMIC BURDEN ESTIMATES FOR 2050</b> .....                                                                                                   | <b>33</b> |
| STEP 1: ESTIMATING INCIDENCE AND DEATHS BY TYPE OF STROKE, BY COUNTRY .....                                                                                                    | 33        |
| STEP 2: ECONOMIC DATA .....                                                                                                                                                    | 34        |
| STEP 3: TRANSLATING DATA ON COSTS OF TREATMENT AND REHABILITATION AND EXPECTED GDP PER WORKER INTO ESTIMATES OF DIRECT COSTS AND INCOME LOSSES FROM INCIDENT STROKE CASES..... | 35        |
| <b>EVIDENCE SUPPORTING THE USE OF THE STROKE RISKOMETER APP FOR STROKE PREVENTION</b> .....                                                                                    | <b>36</b> |

**GOOGLE SCHOLAR SEARCH LIST OF ARTICLES THAT HAS MENTIONED “STROKE RISKOMETER APP” (IN ALPHABETIC ORDER BY FIRST AUTHOR NAME) ..... 36**

**SUPPLEMENTARY FIGURES ..... 50**

SUPPLEMENTARY FIGURE 1. METHODOLOGICAL WORKFLOW FOR DERIVING THE PRAGMATIC SOLUTIONS TO REDUCE THE GLOBAL BURDEN OF STROKE ..... 50

SUPPLEMENTARY FIGURE 2. MATRIX FOR MULTIPLE CASE STUDY MIXED METHODS ANALYSIS OF STROKE SERVICES..... 51

SUPPLEMENTARY FIGURE 3: FORECASTS OF STROKE DEATHS (WITH 95% UI) GLOBALLY BY AGE GROUP (<60 YEARS, 60+ YEARS), PATHOLOGICAL TYPES OF STROKE (ISCHAEMIC STROKE, INTRACEREBRAL HAEMORRHAGE, SUBARACHNOID HAEMORRHAGE, TOTAL STROKES), GBD REGIONS AND WORLD BANK COUNTRY INCOME LEVEL, 2020-2050 ..... 52

SUPPLEMENTARY FIGURE 4: FORECASTS OF AGE-STANDARDIZED STROKE DEATHS RATES PER 100,000 PERSON-YEARS (WITH 95% UI) GLOBALLY BY AGE GROUP (<60 YEARS, 60+ YEARS), PATHOLOGICAL TYPES OF STROKE (ISCHAEMIC STROKE, INTRACEREBRAL HAEMORRHAGE, SUBARACHNOID HAEMORRHAGE, TOTAL STROKES), GBD REGIONS AND WORLD BANK COUNTRY INCOME LEVEL, 2020-2050 ..... 54

SUPPLEMENTARY FIGURE 5: FORECASTS OF DALYS COUNTS GLOBALLY BY AGE GROUP (<60 YEARS, 60+ YEARS), PATHOLOGICAL TYPES OF STROKE (ISCHAEMIC STROKE, INTRACEREBRAL HAEMORRHAGE, SUBARACHNOID HAEMORRHAGE, TOTAL STROKES), GBD REGIONS AND WORLD BANK COUNTRY INCOME LEVEL, 2020-2050 ..... 56

SUPPLEMENTARY FIGURE 6: FORECASTS OF AGE-STANDARDIZED DALYS RATES PER 100,000 PERSON-YEARS GLOBALLY BY AGE GROUP (<60 YEARS, 60+ YEARS), PATHOLOGICAL TYPES OF STROKE (ISCHAEMIC STROKE, INTRACEREBRAL HAEMORRHAGE, SUBARACHNOID HAEMORRHAGE, TOTAL STROKES), GBD REGIONS AND WORLD BANK COUNTRY INCOME LEVEL, 2020-2050 ... 58

SUPPLEMENTARY FIGURE 7. PREVENTING STROKE AND ITS MAJOR RISK FACTORS..... 60

SUPPLEMENTARY FIGURE 8: BEHAVIOURAL CHANGE WHEEL ..... 61

SUPPLEMENTARY FIGURE 9: NEUROREHABILITATION SERVICES FOR STROKE..... 62

**SUPPLEMENTARY TABLES ..... 63**

SUPPLEMENTARY TABLE 1. FORECASTS OF STROKE RELATED DEATHS (COUNTS AND RATES PER 100,000 PERSON-YEARS, WITH 95% UI) BY AGE GROUP (TOTAL, UNDER 60 YEARS OLD, 60+ YEARS OLD), GBD SUPER-REGIONS AND YEAR (2020 AND 2050) ..... 63

SUPPLEMENTARY TABLE 2: FORECASTS OF STROKE RELATED DALYS (COUNTS AND RATES PER 100,000 PERSON-YEARS, WITH 95% UI) BY AGE GROUP (TOTAL, UNDER 60 YEARS OLD, 60+ YEARS OLD), GBD SUPER-REGIONS AND YEAR (2020 AND 2050) ..... 65

SUPPLEMENTARY TABLE 3: GLOBAL FORECASTS OF STROKE RELATED DEATHS AND DALYS (COUNTS AND AGE-STANDARDIZED RATES PER 100,000 PERSON-YEARS, WITH 95% UI) BY STROKE TYPE (IS – ISCHAEMIC STROKE, ICH – INTRACEREBRAL HAEMORRHAGE, SAH – SUBARACHNOID HAEMORRHAGE), AGE GROUP (TOTAL, UNDER 60 YEARS OLD, 60+ YEARS OLD), AND YEAR (2020 AND 2050)..... 67

SUPPLEMENTARY TABLE 4. INCOME LOSSES DUE TO INCIDENT STROKE CASES IN 2017 AND 2050 (IN BILLIONS 2017 US\$)..... 68

SUPPLEMENTARY TABLE 5. DIRECT COSTS AND INCOME LOSSES DUE TO STROKE IN 2017 AND 2050 (IN BILLIONS 2017 US\$)...69

SUPPLEMENTARY TABLE 6. COVERAGE, CURRENT CAPACITY FOR STROKE SURVEILLANCE, AND ESTIMATED UNMET NEEDS ..... 70

SUPPLEMENTARY TABLE 7: THEMATIC ANALYSIS OF SURVEILLANCE SERVICES – SUMMARY OF BARRIERS AND FACILITATORS TO HIGH PERFORMING STROKE SURVEILLANCE SYSTEMS..... 81

SUPPLEMENTARY TABLE 8: KEY RECOMMENDATIONS FOR IMPROVING STROKE SURVEILLANCE..... 83

SUPPLEMENTARY TABLE 9: ESTIMATED COVERAGE AND UNMET NEEDS FOR PREVENTION, ACCORDING TO COUNTRY ..... 84

SUPPLEMENTARY TABLE 10. SUMMARY OF BARRIERS AND FACILITATORS TO STROKE PREVENTION SERVICES..... 92

SUPPLEMENTARY TABLE 11: KEY RECOMMENDATIONS FOR HEALTHCARE PROVIDERS AND GOVERNMENTS TO IMPROVE PRIMORDIAL, PRIMARY AND SECONDARY STROKE PREVENTION..... 93

SUPPLEMENTARY TABLE 12: IDENTIFIED PROBLEMS WITH AND SUGGESTED STRATEGIES FOR POLICY MAKERS TO ACHIEVE SUSTAINABLE AND APPROPRIATE PRIMARY AND SECONDARY STROKE PREVENTION..... 96

SUPPLEMENTARY TABLE 13: ESTIMATED COVERAGE AND UNMET NEEDS FOR ACUTE CARE ACCORDING TO COUNTRY ..... 93

SUPPLEMENTARY TABLE 14. SUMMARY OF BARRIERS AND FACILITATORS TO ACUTE STROKE CARE SERVICES ..... 106

SUPPLEMENTARY TABLE 15: KEY EVIDENCE-BASED RECOMMENDATIONS TO IMPROVE ACUTE STROKE CARE WORLDWIDE..... 108

SUPPLEMENTARY TABLE 16: ESTIMATED COVERAGE AND UNMET NEEDS FOR REHABILITATION, ACCORDING TO COUNTRY ..... 113

SUPPLEMENTARY TABLE 17. BARRIERS AND FACILITATORS FOR IMPROVING STROKE REHABILITATION SERVICES ..... 118

|                                                                                                                                                                               |            |
|-------------------------------------------------------------------------------------------------------------------------------------------------------------------------------|------------|
| SUPPLEMENTARY TABLE 18: SURVEY ON THE IMPLEMENTATION OF WFNR STROKE REHABILITATION PRACTICE RECOMMENDATIONS<br>- PARTICIPANT CHARACTERISTICS AND SETTINGS.....                | 120        |
| SUPPLEMENTARY TABLE 19: FREQUENCY OF IMPLEMENTATION OF TEAM ORIENTED WFNR STROKE REHABILITATION PRACTICE<br>RECOMMENDATIONS.....                                              | 122        |
| SUPPLEMENTARY TABLE 20. KEY RECOMMENDATIONS BASED ON NATIONAL STROKE GUIDELINES AND WFNR<br>RECOMMENDATIONS TO IMPROVE STROKE REHABILITATION SERVICES WORLDWIDE.....          | 12424      |
| SUPPLEMENTARY TABLE 21: SUMMARY OF KEY PRAGMATIC SOLUTIONS BASED ON NATIONAL AND INTERNATIONAL STROKE<br>GUIDELINES TO IMPROVE STROKE REHABILITATION SERVICES WORLDWIDE ..... | 164        |
| <b>REFERENCES.....</b>                                                                                                                                                        | <b>171</b> |

## OVERVIEW OF METHODS

After reviewing results from the survey and review of stroke guidelines,<sup>1-3</sup> we also performed a review of relevant literature on interventions for stroke. To guide and direct the actions of the Commission, a conceptual framework was developed (Figures 1-3 in the manuscript). For each step there were predefined activities as follows:

1. Situational and Gap analysis
  - 1.1. Situational analysis including stroke burden (deaths and DALYs) forecast from 2020 till 2050 (GBD Study).
  - 1.2. Stroke rehabilitation services/settings (tele-rehabilitation, home based, community based).
  - 1.3. National, regional and global stroke control targets, strategic plans, and KPIs in roadmaps and pragmatic guidelines, synergy with WHO and UN NCD SDG initiatives and 2030 targets as well as Universal Health Coverage.
  - 1.4. Rank countries according to performance scores in stroke surveillance, prevention, acute care, and rehabilitation.
  - 1.5. Identification of success stories in various settings that can be leveraged across the globe.
  - 1.6. Gap analysis and priority setting. Key Informant Interviews (WSO funded thematic analysis).
2. Evidence-based interventions
  - 1.1. Evidence-based practice recommendations based on synthesis of evidence-based guidelines and emerging RCTs and meta-analyses based on systematic evidence-to-decision methodology including Grading quality of evidence and strength of recommendations (GRADE)<sup>4</sup> (non-pharmacological, pharmacological, surgical, rehabilitation etc.).
3. Implementation science framework
  - 1.1. Behavioural change wheel<sup>5</sup>
  - 1.2. Co-production and co-implementation of political, legal, ethical, sociocultural, and economic framework. Advocacy using economic case and political case.
4. Pragmatic solutions, targets, ecosystems, key performance indicators, and future directions
  - 1.1. Pragmatic solutions will be presented with dedicated sections for global, regional and LMIC contexts.
  - 1.2. Implementation science ecosystem. WSO Task Force on Stroke in synergy with NCD control initiatives, World Heart Federation (WHF), Global Coalition for Circulatory Health, European Stroke Organisation (ESO), World Federation for Neurorehabilitation (WFNR). WHO Rehabilitation 2030 Initiative in synergy with local, national, and regional actors, plans and strategies (e.g., AHA/ASA, AAN, MENASO, ESO, ASO, NGOs- NCD Alliance, UNGA, World Health Assembly [WHA], Resolve To Save Lives, World Bank, OneNeurology, Angels Initiative for spreading acute care -covering >6000 hospitals in >140 countries, MT2020 + GEC [for spreading mechanical thrombectomy], etc.). Increase the number of Commissioners for global coverage.
  - 1.3. Interactions with WHO and WHA, and Ministries of Health.
  - 1.4. Support from and/or partnership with the World Bank and other major charity organizations, philanthropists.
  - 1.5. Innovations: digital solutions, social media, Artificial Intelligence, trans-omics, social marketing, applied theatre, life-course multi-sectoral approach, tele-health, data science, precision public health, success stories, mobile phone apps for surveillance, prevention, tele-rehab, acute care connections; Interactive websites etc.

- 1.6. Policy briefs.
- 1.7. Presentation and launching at the World Stroke Congress in October 2023.
- 1.8. Others - Bellagio meeting and agenda for August/September 2023, timelines, and deliverables.

### Priority Setting

At this stage, we identified key recommendations with the highest grade of evidence from best quality stroke guidelines. The guidelines utilized were those which fulfilled the criteria proposed by the Institute of Medicine standard;<sup>6</sup> comprehensively covered a wide spectrum of stroke services; were regularly and recently updated; with targeted audience including healthcare providers, patients, policy makers, and the populace; and/or were international or regional.

These include recommendations of the leading high quality global evidence-based stroke guidelines from three continents and several major stroke organizations: the American Heart Association (e.g., Class I Level A),<sup>7</sup> Netherlands KNGF Stroke Guideline,<sup>8,9</sup> Canada Stroke Best Practice recommendation,<sup>10</sup> European Stroke Organisation,<sup>11</sup> Australian Stroke Foundation,<sup>12</sup> New Zealand Stroke Foundation,<sup>13</sup> National Institute for Health and Care Excellence (NICE) guidelines for stroke,<sup>14</sup> and World Stroke Organization.<sup>15</sup> From these top quality guidelines, we selected and prioritized only consistent recommendations with the best grade of evidence. We indicated the level of evidence for each selected recommendation according to the evidence level assigned by the stroke guidelines.

### Contextualization

At this stage, for each guideline-derived recommendation selected, we considered the ethical, legal, sociocultural, and economic implications, anticipated and observed barriers and facilitators for its implementation within the framework of the implementation cycle. This cycle includes a contextualization and dissemination plan to all stakeholders (providers, practitioners, policy makers, payers, populace, implementation partners).<sup>16-18</sup> The contextual barriers and facilitators were derived from the situational analysis provided by the surveys and systematic reviews as well as narrative review of relevant literature.

### Solutions and Research Gaps

This stage involved synthesis of pragmatic solutions to overcome barriers and amplify facilitators for practical implementation of the selected evidence-based recommendations. Whenever evidence-based recommendations were not available to address certain clinical needs, the evidence and research gaps were noted. Furthermore, the financial costs of stroke were estimated and an economic case for stroke prevention, acute care and rehabilitation developed.

A follow-up assessment will be conducted with an updated report to estimate the possible impact of the Commission's recommendations on changes to stroke services in three to five years. Over the years, we will also monitor the trend of stroke burden – incidence, prevalence, mortality and DALYs through the GBD and other sources.

### Innovation

Pragmatic interventions to achieve the WHO NCD targets should follow these four cardinal recommendations:

1. Synergistic actions should be coordinated based on an implementation science theory<sup>5</sup> which can be adapted to harmonize, synchronize, and synergize all action items in the roadmap.
2. Develop a sustainable multisectoral interdisciplinary implementation ecosystem (at international, regional, national, and subnational levels -macro [legal, regulatory, and economic barriers and enablers], meso [local health services and community factors] and micro [day-to-day practice] levels) that informs, Inspires, collaborates with, and empowers all stakeholders to act towards achieving the targets under the leadership of the WSO Task Force on Stroke.
3. Use an Integrated NCD approach addressing surveillance, prevention, acute care, and rehabilitation across the life-course.
4. Use the principle of the iterative implementation cycle to navigate barriers and enhance facilitators to deliver impact through effective communication with and participation of all stakeholders.

### **Strengths**

The pragmatic solutions offered were based on prioritization of evidence-based recommendations from high quality stroke guidelines derived from a systematic review of stroke guidelines across the globe. Contextualization to facilitate implementation in low- and middle-income settings was informed by the data from the situational analysis which identified the service gaps and barriers. The proposed ecosystem for synergistic action is the global stroke control observatory and risk reduction ecosystem, the components and interactions of which we illustrated in Figures 1-3 of the manuscript. In addition to this proposed ecosystem for synergistic action, as well as the dissemination and implementation plans, we provided an economic case to support the implementation of the solutions as well as policy briefs to engage policy makers.

## **STROKE BURDEN PROJECTIONS**

### **Methods used to forecast stroke burden**

The methodology for determining stroke types has been reported elsewhere.<sup>19</sup> Forecasts of stroke burden were produced from cause-specific GBD 2019 estimates of mortality, incidence, and prevalence for IS, ICH and SAH.<sup>19,20</sup>

Mortality rates for each individual cause were forecasted using a three-component model comprised of: (1) the underlying (or risk deleted) mortality, modelled as a function of the socio-demographic index (SDI)<sup>21</sup> and time; (2) a risk factor scalar that captures cause-specific combined risk factor effects based upon the GBD comparative risk assessment, which quantifies risk-outcome associations accounting for risk factor mediation; and (3) unexplained residual mortality. Additional modelling details are described in Foreman et al.<sup>22</sup> and Vollset et al.<sup>23</sup> The risk factor scalars for each of the stroke sub-causes (ICH, SAH and IS) were comprised of the following individual risk exposure forecasts: alcohol use, poor diet quality, air pollution (household and particulate matter), high body mass index, high fasting plasma glucose, lead toxicity, impaired kidney function, high systolic blood pressure, and non-optimal temperature.

Forecasts of disability-adjusted life-years (DALYs) lost were produced from forecasts of years of life lost (YLLs; via mortality) and years lived with disabilities (YLDs; via prevalence and incidence). Forecasts of incidence for IS, ICH and SAH were modelled using a linear mixed-effects model (the mortality-incidence ratio) and used forecasted mortality to convert to incidence and prevalence (not reported

in this manuscript but used for estimating projections of DALYs). This was to allow the forecasts of risk exposure (via the risk factor scalar) to also drive the subsequent forecasts of incidence and prevalence. Prevalence forecasts for ICH and SAH were modelled using a modelled prevalence-incidence ratio, while IS prevalence was modelled directly.

Mortality-incidence and prevalence-incidence ratios were modelled as:

$$\log(R_{a,s,l,y}) = \beta_0 + \beta_1 SDI_{l,y} + \pi_{0:a,s,l} + \pi_{1:a,s,l} SDI_{l,y} + \varepsilon_{a,s,l,y}$$

where  $R_{a,s,l,y}$  is the age-sex-location-year specific ratio for a given cause, with the covariate  $SDI_{l,y}$  being the location-year specific SDI.  $\pi_{0:a,s,l}$  is the age-sex-location specific random intercept,  $\pi_{1:a,s,l}$  is the age-sex-location specific slope on SDI, and  $\varepsilon_{a,s,l,y}$  is the residual term. A shift in log space was applied to each age-sex-location combination after prediction to align the value of the modelled value in the last year of GBD estimates with the GBD estimate for that year.

Prevalence of IS was modelled as:

$$\text{logit}(P_{a,s,l,y}) = \beta_0 + \beta_1 SDI_{l,y} + \pi_{0:a,s,l} + \varepsilon_{a,s,l,y}$$

where  $P_{a,s,l,y}$  is the age-sex-location-year specific prevalence of a given cause, with location-year specific SDI as the covariate for the fixed slope and  $\pi_{0:a,s,l}$  as the age-sex-location specific random intercept.

Once forecasts of prevalence for all causes were obtained, they were converted to YLD using average disability weights calculated as the YLD divided by prevalence in 2019. The YLL were computed by multiplying the number of deaths by the reference life expectancy at the age of death. Forecasts YLLs were computed from forecasted age-sex-location-specific mortality rates and GBD reference life table.<sup>19</sup> Future YLLs and YLDs were then added together to obtain forecasts of DALYs.

Forecasts of all measures were produced by age and sex at the national level and are aggregated using population to global and regional estimates. Population forecasts are produced as described in Vollset et al.<sup>23</sup> All projected estimates are reported with 95% uncertainty intervals (UI).

## THEMATIC ANALYSIS METHODS

### Setting

We used a multiple case study approach to gain an understanding of the barriers and facilitators to high-quality stroke services across the world. Multiple case studies allow consideration of an area from multiple perspectives.<sup>24</sup> The aim was to identify gaps and pragmatic solutions to address the broader goals of the WSO – The Lancet Neurology Commission on Stroke.

### Qualitative data

Qualitative data was captured in interviews conducted by researchers with expertise in stroke and qualitative methods. Interviews were conducted by three interviewers (SG, TPN, EU) from July to September 2022 via online web conferencing software and recorded. A semi-structured interview guide was used for interviews (see appendix). Questions explored characteristics of the services based on health system building blocks of service delivery, workforce, information, technology, financing, and governance.



### **Participating countries**

Participating countries were identified from the State of Stroke Services survey<sup>2</sup> conducted by the WSO with involvement of some members of the Operations Committee of the WSO – The Lancet Neurology Commission on Stroke. Key informants who spoke English and were from countries with exemplars of ‘acceptable’, ‘good’ or ‘very good’ activities across surveillance, prevention, acute care, and rehabilitation sections were invited to participate. In the context of the State of Stroke Services Survey, scores of 30% to <50% were determined as acceptable, 50% to <75% were determined as good and 75% to 100% were determined as very good. We used purposeful sampling to obtain exemplars from two countries in each World Health Organisation (WHO) region that perform well with scores at least 30% across multiple sections, with one higher income and the one lower income country. When there were many potential countries that met the criteria, we used a random number generator to select a country.

### **Recruitment strategy**

We aimed for 2 countries per WHO region (African region, Eastern Mediterranean region, European region, region of the Americas, South-East Asia region, and Western Pacific region) for the stroke prevention, acute care and rehabilitation sections of the manuscript. From our purposeful sampling of countries with high performance across sections, we created a ‘contact’ list of countries with each region having 2 primary and 2 alternate contacts. If a respondent for a ‘primary’ country was unable to be identified, we use ‘alternative’ contacts from the list. We initially invited commissioners who completed the WHO-WSO quantitative survey to participate in the interviews. Once a potential participant was identified, the research team contacted these potential participants via email explaining the study. If participants were interested, they were sent a ‘Participant Information Pack’ including a cover letter, the questions for the interview, the information sheet and consent form before the interview. All participants provided written informed consent prior to interviews.

### **Data Collection**

The virtual interviews were estimated to take between 45-60 minutes. Identifying information of the respondent was not gathered as part of the interviews. We used an identification code to link interviews across countries. Identifiable information such as name were not collected during the interview and participant/country identities were not identifiable in analyses or outputs.

### **Data Analysis**

We conducted a within-case analysis for interviews from each country survey using a pre-developed coding matrix. The coding matrix consists of two dimensions: health system building blocks (workforce, finance, services, technology, information, and governance) and the impact of a factor (barrier/facilitator).

This was followed by a thematic analysis across countries/services to identify similar patterns in the facilitators or barriers associated with good stroke services. Two researchers conducted thematic analysis for separate areas of stroke services (SG – rehabilitation and acute care; TPN – prevention and surveillance). Analyses were conducted using NVivo.

### **Funding**

The study was supported by funding from the World Stroke Organization and Synergies to Prevent Stroke (STOPstroke, GNT1182071).

## Ethics

The thematic analysis study was approved by the Tasmania Health and Medical Research Ethics Committee (H027312).

## Results

We contacted potential interviewees for 12 countries identified as 'primary' contacts using the sampling frame. Of these, the primary contacts agreed to participate for 7 countries. We contacted 'alternate' contacts for the remaining countries with an additional 4 agreeing to participate. The final participants came from each WHO region with a good distribution of income regions noting that not all interviews across all sections were able to be completed due to non-response of suggested interviewee. There were 34 interviews in total covering all sections across all WHO regions and high (n=3), upper middle (n=3) and low (n=6) income countries.

Table 1. Interviews completing within sampling framework by WHO region and income level showing total interviews within sections and within countries

| WHO region                   | Country # | Income level | Surveillance | Prevention | Acute Care | Rehabilitation | Total |
|------------------------------|-----------|--------------|--------------|------------|------------|----------------|-------|
| African Region               | 1         | LI           | 1            | 1          | 1          | 1              | 4     |
| African Region               | 2         | LMI          |              | 1          | 1          | 1              | 3     |
| Region of the Americas       | 1         | LMI          |              |            | 1          |                | 1     |
| Region of the Americas       | 2         | HI           | 1            |            |            |                | 1     |
| Eastern Mediterranean Region | 1         | UMI          | 1            | 1          | 1          | 1              | 4     |
| Eastern Mediterranean Region | 2         | LMI          | 1            | 1          | 1          | 1              | 4     |
| European Region              | 1         | HI           | 1            | 1          | 1          | 1              | 4     |
| European Region              | 2         | LI           | 1            | 1          |            |                | 2     |
| South-East Asian Region      | 1         | LMI          | 1            | 1          | 1          | 1              | 4     |
| South-East Asian Region      | 2         | UMI          |              |            | 1          |                | 1     |
| Western Pacific Region       | 1         | HI           | 1            | 1          |            | 1              | 3     |
| Western Pacific Region       | 2         | UMI          | 1            | 1          | 1          |                | 3     |
| Total                        |           |              | 9            | 9          | 9          | 7              | 34    |

## Appendix

### *Semi-structured interview guides*

Numbered questions were sent to interviewees prior to interview with prompts held by interviewer if initial responses did not illicit the necessary information.

### *Acute care*

Question 1 - Can you describe the acute stroke services in your country?

Prompts

- Can you describe the general structure of the health care system in your country? e.g., public versus private, state or federal management of hospitals.
- What are the standard components of acute stroke care that are provided? e.g., imaging including CT or advanced neuroimaging, tPA, clot retrieval, stroke units, specialized stroke nurses, paramedic pre-hospital stroke screening.

- What protocols or guidelines are in place for acute stroke treatment? e.g., national guidelines, hospital level guidelines, international guidelines.
- How equitable is the delivery of these services across the country? e.g., differences between urban and rural, transfer protocols, hub and spoke networks.

Question 2 - Can you describe the workforce for acute stroke care?

Prompts

- What types of training and skills do people working in acute stroke care have? e.g., physician training, specialized training in stroke, overseas fellowships, specialized nursing education as undergraduate or postgraduate.
- What types of strategies are there to attract or retain people to work in acute stroke care in your country? e.g., undergraduate or post-graduate training, research fellowships.
- What works well with your workforce for acute stroke care in your country?
- What isn't working well with your workforce for acute stroke care in your country?

Question 3 - How is acute stroke care funded in your country?

Prompts

- Can you describe how different levels of government might fund acute stroke care? e.g., state or federal funding; universal health care
- How are private organizations involved in funding acute stroke care? e.g., private health insurance, private hospitals, employer programs.
- What do you think about the level of funding that is provided for acute stroke care?
- What works well with funding for acute stroke care?
- What isn't working well with funding for acute stroke care?

Question 4 - How is technology used for acute stroke care?

Prompts

- Can you describe the role of technology in acute stroke care? Could include electronic medical records, telehealth, advanced neuroimaging.
- What are the barriers to using technology in acute stroke care?
- What facilitates your use of technology for acute stroke care?

Question 5 - What is the role of information or data in your delivery of acute stroke care?

Prompts

- What are the sources of data to monitor levels of acute stroke care? e.g., hospital-based surveys, clinical quality registries.
- What is the coverage of data on acute stroke care like?
- How are these data used for audit and feedback or quality improvement initiatives?
- How is the collection of these data funded?
- What are the things that work well with using information or data for acute stroke care?
- What are the things that don't work well in terms of information or data for acute stroke care?

Question 6 - What are the governance processes you have around acute stroke care?

Governance processes may include a wide range of components, including ethics, policies, frameworks/procedures, guidelines, risk management, and administration around stroke surveillance.

## Prompts

- Who is responsible for the coverage and quality of acute stroke care in your country? e.g., national standards on hospital care, federal or state governments.
- What are the frameworks or guidelines for acute stroke at a local, national or regional level?
- What types of advisory groups are responsible for monitoring or improving acute stroke care in your country? Do these operate at a national, regional or hospital level?
- What is the role of accreditation of health professionals or hospitals to provide different levels of stroke care? e.g., body that accredits comprehensive or primary stroke centres; body for accrediting neurologists for stroke care; credentialing of neuroradiologists.
- What works well with the governance of acute stroke care?
- What isn't working well with the governance of acute stroke care?

Question 7 - Is there something else you would like to say, that we have not talked about in the interview?

## Prevention

Question 1 - Can you describe the services for the primary and secondary prevention of stroke in your country?

## Prompts

- What are the services for the primary prevention of stroke? e.g., annual health checks with general practitioner or primary care doctor; community screening of risk factors; awareness campaigns for risk factors (e.g., smoking, blood pressure); government policies or laws – e.g., tobacco control; obesity or diet strategies; absolute cardiovascular risk assessment.
- What are the services or programs for secondary prevention? e.g., in-hospital risk factor education; routine use of discharge medications; connections with primary or community care; specific programs for risk factor modification run by the hospital or community organisations.
- What protocols or guidelines are in place for primary prevention of stroke? e.g., national guidelines, hospital level guidelines, international guidelines.
- What protocols or guidelines are in place for secondary prevention? e.g., national guidelines, hospital level guidelines, international guidelines.
- How equitable is the delivery of these services across the country? e.g., differences between urban and rural; transfer protocols, hub and spoke networks.
- Can you describe the general structure of the health care system in your country? e.g., public versus private, state or federal management of hospitals.

Question 2 - Can you describe the workforce for stroke prevention?

## Prompts

- What types of training and skills do people working in primary prevention have? e.g., general practice, nursing, pharmacy, community health workers.
- What types of training and skills do people working in secondary prevention have? e.g., general physicians, neurologists, general practice, nursing, pharmacy, community health workers.
- What works well with your workforce for stroke prevention in your country?
- What isn't working well with your workforce for stroke prevention in your country?

### Question 3 - How are stroke prevention activities funded in your country?

#### Prompts

- Can you describe how different levels of government might fund primary prevention activities? e.g., state or federal funding, universal health care, user pays, private health insurance, non-government organisations.
- Can you describe how different levels of government might fund secondary prevention activities? e.g., state or federal funding, universal health care, user pays, private health insurance, non-government organisations.
- What do you think about the level of funding that is provided for primary prevention?
- What do you think about the level of funding that is provided for secondary prevention?
- What works well with funding for stroke prevention?
- What isn't working well with funding for stroke prevention?

### Question 4 - How is technology used for stroke prevention?

#### Prompts

- Can you describe the role of technology in stroke primary prevention? Could include telehealth, risk assessment tools, digital health, e.g., apps like Stroke Riskometer, online information.
- Can you describe the role of technology in stroke secondary prevention? Could include electronic medical records, telehealth, risk assessment tools, digital health, online information.
- What are the barriers to using technology in stroke prevention?
- What facilitates your use of technology for stroke prevention?

### Question 5 - What is the role of information or data in stroke prevention?

#### Prompts

- What are the sources of data to monitor primary or secondary prevention? e.g., hospital-based surveys, clinical quality registries.
- What is the coverage of data on secondary prevention?
- How are these data used for audit and feedback or quality improvement initiatives?
- How is the collection of these data funded?
- What are the things that work well with using information or data for stroke prevention?
- What are the things that don't work well in terms of information or data for stroke prevention?

### Question 6 - What are the governance processes you have around stroke prevention?

Governance processes may include a wide range of components, including ethics, policies, frameworks/procedures, guidelines, risk management, and administration around stroke surveillance.

#### Prompts

- Who is responsible for the coverage and quality of stroke prevention in your country? e.g., national standards on hospital care, federal or state governments.
- What are the frameworks or guidelines for primary stroke prevention at a local, national or regional level?

- What are the frameworks or guidelines for secondary stroke prevention at a local, national or regional level?
- What types of advisory groups are responsible for monitoring or improving stroke prevention in your country? Do these operate at a national, regional or hospital level?
- What works well with the governance of stroke prevention?
- What isn't working well with the governance of stroke prevention?

Question 7 - Is there something else you would like to say, that we have not talked about in the interview?

### *Rehabilitation*

Question 1 - Can you describe the stroke rehabilitation services in your country?

Prompts

- What activities are provided in terms of stroke rehabilitation in the hospital? e.g., in-patient, outpatient; patient and carer education, home modifications, range of allied health supports – physiotherapy, OT, speech, neuropsychology, fitness.
- What activities are provided in terms of stroke rehabilitation outside of the hospital? e.g., home-based rehabilitation, community rehabilitation, range of allied health supports – physiotherapy, OT, speech, neuropsychology.
- Who delivers these services? Are they provided by the government, non-government or academic sectors?
- What is the scope of these activities? Are they local, regional or national?

Question 2 - Can you describe the workforce for stroke rehabilitation?

Prompts

- What types of settings do people that provide stroke rehabilitation work in?
- What types of training and skills do these people have? e.g., undergraduate/postgraduate, local versus overseas trained, community health workers.
- What types of strategies are there to attract or retain people to contribute work in stroke rehabilitation in your country? e.g., undergraduate or post-graduate training, research fellowships.
- What works well with your workforce for stroke rehabilitation in your country?
- What isn't working well with your workforce for stroke rehabilitation in your country?

Question 3 - How are stroke rehabilitation activities funded in your country?

Prompts

- Can you describe how different levels of government might fund stroke rehabilitation activities? e.g., state or federal.
- What role do non-government organisations play in providing stroke rehabilitation activities? e.g., local stroke associations, community groups.
- How are private organisations involved in funding stroke rehabilitation? e.g., private practices, user pays, private health insurance.
- What do you think about the level of funding that is provided for stroke rehabilitation activities?
- What works well with funding for stroke rehabilitation?

- What isn't working well with funding for stroke rehabilitation?

Question 4 - How is technology used for stroke rehabilitation?

Prompts

- Could include administrative tasks - electronic medical records, patient follow-up and outcome assessments.
- Could include service delivery – telehealth or online systems, use of devices to enhance recovery (robotics).
- What are the barriers to using technology in stroke rehabilitation?
- What facilitates your use of technology for stroke rehabilitation?

Question 5 - What is the role of information or data in your delivery of stroke surveillance?

Prompts

- What are the sources of data to monitor levels of stroke rehabilitation? e.g., hospital-based surveys, clinical quality registries.
- What is the coverage of data on stroke rehabilitation like?
- How are these data used for audit and feedback or quality improvement initiatives?
- How is the collection of these data funded?
- What are the things that work well with using information or data for stroke rehabilitation?
- What are the things that don't work well in terms of information or data for stroke rehabilitation?

Question 6 - What are the governance processes you have around stroke rehabilitation?

Governance processes may include a wide range of components, including ethics, policies, frameworks/procedures, guidelines, risk management, and administration around stroke surveillance.

Prompts

- Who is responsible for the coverage and quality of stroke rehabilitation in your country? e.g., national standards on hospital care, federal or state governments.
- What are the frameworks or guidelines for stroke rehabilitation at a local, national or regional level?
- What types of advisory groups are responsible for monitoring or improving stroke rehabilitation in your country? Do these operate at a national, regional or hospital level?
- What is the role of accreditation of health professionals or hospitals to provide different levels of stroke rehabilitation e? E.g., body that accredits rehabilitation providers.
- What works well with the governance of stroke rehabilitation?
- What isn't working well with the governance of stroke rehabilitation?

Question 7 - Is there something else you would like to say, that we have not talked about in the interview?

### *Surveillance*

Question 1 - Can you describe the stroke surveillance services in your country?

Prompts

- What activities are provided in terms of measuring the burden of stroke? e.g., incidence studies, clinical registries, population risk factor surveys.

- What measures of stroke burden do you have in your country? e.g., incidence, prevalence, survival, patient-reported outcomes?
- What measures of stroke risk factors, such as smoking, blood pressure or weight status, do you have in your country?
- Who delivers these services? Are they provided by the government, non-government or academic sectors?
- What is the scope of these activities? Are they local, regional or national?

Question 2 - Can you describe the workforce for stroke surveillance?

Prompts

- What types of settings do people that provide stroke surveillance work in?
- What types of training and skills do these people have?
- What types of strategies are there to attract or retain people to contribute to stroke surveillance in your country? e.g., undergraduate or post-graduate training, research fellowships.
- What works well with your workforce for stroke surveillance in your country?
- What isn't working well with your workforce for stroke surveillance in your country?

Question 3 - How are stroke surveillance activities funded in your country?

Prompts

- Can you describe how different levels of government might fund surveillance activities?
- What role do non-government organizations play in providing stroke surveillance activities? e.g., WHO, Heart Foundation, Stroke Foundation, ISH.
- How are private organizations or universities funded to provide stroke surveillance services?
- What do you think about the level of funding that is provided for stroke surveillance activities?
- What works well with funding for stroke surveillance?
- What isn't working well with funding for stroke surveillance?

Question 4 - How is technology used for stroke surveillance?

Prompts

- Can you describe how you capture the information on stroke risk factors, incidence or outcomes using technology? Could include electronic medical records, telephones, online surveys, registries.
- What are the barriers to using technology in stroke surveillance?
- What facilitates your use of technology for surveillance?

Question 5 - What is the role of information or data in your delivery of stroke surveillance?

Prompts

- What are the sources of data used for stroke surveillance? e.g., hospital-based surveys, routinely reported data on deaths, data linkage, national risk factor surveys.
- What is the coverage of data like?
- How recent are the data?
- What are the things that work well with using information or data for stroke surveillance?
- What are the things that don't work well in terms of information or data for stroke surveillance?



Question 6 - What are the governance processes you have around stroke surveillance?

Governance processes may include a wide range of components, including ethics, policies, frameworks/procedures, guidelines, risk management, and administration around stroke surveillance.

Prompts

- Who is responsible for health or stroke data?
- What processes are in place around collection and reporting of data on stroke burden or risk factors? e.g., ethics committees?
- What are the frameworks or guidelines for stroke surveillance at a national or regional level?
- Are there terms of reference, policies, procedures, action plans?
- What types of advisory groups are responsible for data relating to surveillance of stroke and its risk factors?
- What works well with the governance of stroke surveillance?
- What isn't working well with the governance of stroke surveillance?

Question 7 - Is there something else you would like to say, that we have not talked about in the interview?

## Models of acute stroke care in LMIC

### India

Despite the challenges faced by LMICs there are several successful acute stroke care models which have the potential to be scaled up. The physician-based model in Tezpur, India,<sup>25</sup> a hub and spoke model involving government secondary level hospitals<sup>26</sup> has improved the stroke care in these regions including intravenous thrombolysis. Training the community health care workers in rural areas and integrating the stroke patient's referral through primary health care to district hospitals is another successful model implemented in the north-western part of India.<sup>27,28</sup>

### China

China's approach to promoting the quality of acute stroke care is very pragmatic and effective via interaction between stroke experts, stroke society and government. In 2010, the first evidence-based national guideline for acute ischaemic stroke were publicized and promoted, which has been updated twice. After the first guideline release, the proportion of intravenous thrombolysis increased steadily. In 2015, stroke centre certification action was initiated by the stroke society and government. Till now, there are 602 comprehensive stroke centres and 1,1178 primary stroke centres in mainland China. Through the formulation and promotion of high-quality guidelines, as well as the certification and improvement plan of stroke centres organized by the government, the quality of acute stroke care in China has been significantly improved, especially for acute stroke reperfusion. For example, the intravenous thrombolysis rate of acute cerebral infarction in China has increased from 1.11% before 2010 to the latest 6.20%, and the median door-to-needle time (DNT) has shortened from 116 minutes before 2010 to the latest 60 minutes.<sup>29-31</sup>

### Brazil

Brazil is a good example of how specialists, through the Brazilian Stroke Network, working together with the government, can modify the vision of health authorities and guide them, step-by-step, to develop everything that has been proven to improve the outcome of stroke patients. Since the recognition of stroke care in the country, the elaboration of a national stroke plan (published by the

Ministry of Health (MOH) in 2012), the definition of the structure of the stroke units and team of professionals, implementation of reperfusion treatment, engagement of pre-hospital services with the hospitals in the region, the training of health professionals, the education of the population regarding the warning signs and prevention and the organization of the line of care line for stroke (each component of the stroke care has a role and a protocol, primary care units, pre-hospital, hospital and rehabilitation services).<sup>32,33</sup> Also, MOH has funded research in stroke and used the results to implement treatments and to guide policies as occurred with mechanical thrombectomy evaluated in a Brazilian MOH randomized Clinical Trial in public hospitals.<sup>34</sup> The study showed similar results of 8 previous trials, all performed in high-income countries, and proved that the overwhelming efficacy of MT persists despite the many limitations encountered in the public healthcare system of a developing country. Now, MOH is funding other reperfusion clinical trials and evaluating the polypill for primary stroke prevention. This work over the last 10 years has decreased the stroke mortality in the country by 57.8%.<sup>32,35</sup> Another important initiative includes a public and private partnership for telemedicine in acute stroke care. With a mobile smartphone app, validated to guide thrombolysis,<sup>36</sup> currently 30 public hospitals distributed in the entire country receive real time consultation from 8 stroke experts, increasing access to reperfusion treatments. Also, an app is used to triage the patients with the pre-hospital team connected to the stroke centres, putting the right patient at the right hospital, and decreasing the door-to-reperfusion time.

#### **Supplementary PANEL X: Telemedicine for Stroke from Brazil to Ethiopia**

##### **Pilot Phase:**

- A pilot programme for telemedicine in stroke in Brazil was implemented in 2008 together with the Ministry of Health in an Emergency Hospital without neurologists in Canoas, a southern city of Brazil covering a population of 323,827 inhabitants. The emergency physician did the first evaluation, called the telestroke team composed of stroke neurologists, who in real time reviewed the neurological examination through a webcam installed in the CT room, and evaluated the CT scan through software installed in the scanner in the hospital, both connected to a laptop. The stroke neurologist helped the doctor in the hospital in the decision of acute treatment including intravenous (IV) thrombolysis. In one year, 56 patients were evaluated and 35 were treated with IV thrombolysis. The median baseline NIHSS score was 10 (IQR 7–13), 57% (20/35) of the patients were independent after 3 months (modified Rankin scale: 0–2), 2.9% (1/35) had symptomatic intracranial haemorrhage, and 5.7% (2/35 patients) died. These good results were similar to the international results of IV thrombolysis and were responsible for the approval of telemedicine by the Ministry of Health for stroke in Brazil but without a specific funding for it.<sup>33</sup>

##### **Development of conventional telemedicine:**

- In 2016 a private hospital in the southern part of Brazil created a programme connected to 6 public Ministry of Health essential stroke centres, none of which had a neurologist. The neurologists on duty in the emergency room (ER) at the private hospital were responsible for advising the telestroke programme. Two of the public hospitals had started to treat stroke patients with IV thrombolysis by emergency physicians before the

telemedicine programme. They treated 14 patients in one year before the telemedicine and 74 in one year after the implementation of the programme showing that the specialist giving support probably increased 5.3-fold the number of treated patients. In two years, the programme was activated for 324 cases in the 6 hospitals and 179 were treated with IV thrombolysis (55%) confirming the same international safety and good outcomes.

- Despite the good results of the pilot project completed in 2009 and international studies showing the benefits of telemedicine, due to a huge lack of stroke centres in several areas of Brazil (due to lack of neurologists to cover all hospitals 24 hours/day, 7 days/week and other reasons), from 2010 to 2019 only 26 hospitals developed telemedicine programmes (20 private participants of a private network of hospitals and 6 public hospitals mentioned before connected to a private hospital).

#### **Migrating to a Mobile Telestroke program:**

- The cost of traditional telemedicine continues to limit its more widespread use in LMIC, including in Brazil. Since 2014, Brazil started to use a Health Insurance Portability and Accountability Act compliant, low-cost smartphone application system (JOIN App; Allm, Tokyo, Japan) for the rapid sharing of clinical and neuroimaging patient data to connect the stroke team and to help in the decision-making process in acute stroke care. The validation of this app with 442 acute stroke patients to connect the stroke team in- and outside the hospital aiding in the treatment of acute stroke, including the decision of thrombolytic treatment was published in 2020.<sup>37</sup>
- In 2019 a Brazilian Stroke Network telestroke programme using the Join App, was created with 9 stroke neurologists connected to give support in real time to the new essential public stroke centres without neurologists. The programme is sponsored by the Angels Initiative and Allm Company and in three years already cover 30 hospitals in 9 states. In this period the response time from the neurology team was 2 minutes, there were 2032 cases, 1596 were strokes, 1361 ischemic strokes and 661 thrombolysis. From the patients treated with thrombolytic therapy only 2% had symptomatic intracranial haemorrhage. With this programme it was possible to implement 30 more stroke centres in the country increasing access to thrombolytic therapy. 10 more hospitals are in preparation.
- This experience in Brazil was translated to Ethiopia in a WSO African Task Force initiative to implement acute stroke care in the country. To support this initiative a Telestroke without Borders programme was created using the Join App to connect WSO experts from Canada, the United States, Brazil, Spain, Belgium, Malaysia, India, and Egypt, as volunteers to support in real time the acute stroke care in 3 hospitals in Ethiopia where essential stroke units and thrombolytic medication was implemented for a pilot project. Telemedicine has been working since January 2023 and in two months the first 4 patients were treated with thrombolytics with good results.

## Telestroke without Borders

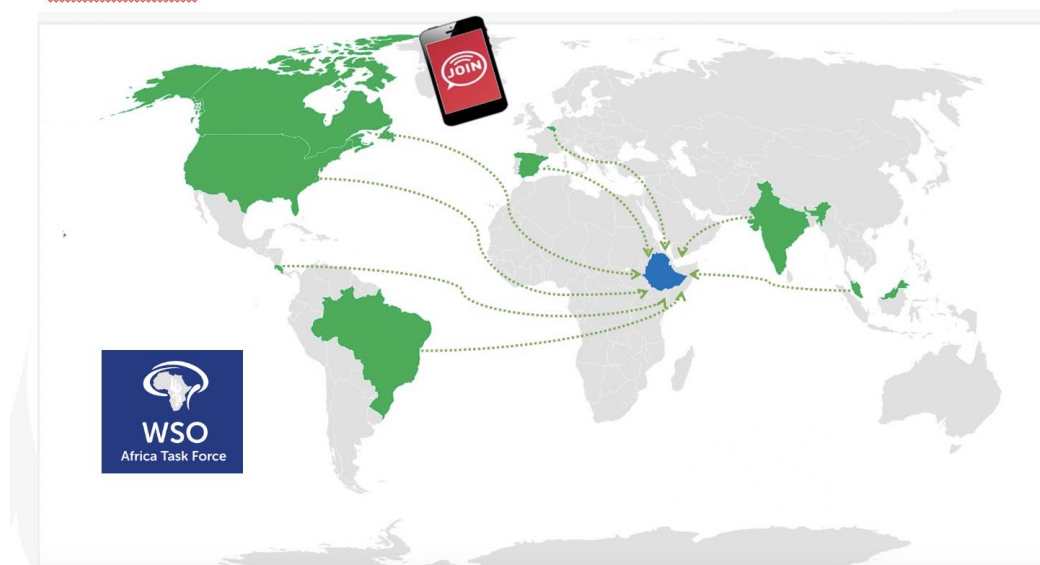

### Chile

Since 2005, the Chilean MOH has implemented the Explicit Health Guarantees (the AUGÉ law)<sup>38</sup> which assures access to a CT scan to all stroke patients within less than 24 hours of the event, hospitalization, neurological consultation and access to rehabilitation for all patients with acute strokes. They also include secondary prevention medications (anticoagulant drugs, DOACs, aspirin, clopidogrel, statins and hypotensive medications) as well as coiling or clipping of ruptured aneurysms, as indicated.<sup>39</sup> Reducing stroke case fatality rates was one of the priorities in the National Health Strategy (2011-2020). Specific targets have been established regarding 12-month survival rates, and reducing stroke burden was recently set as the [2020-2030 national health strategy](#). Also, the Ministry of Health has developed evidence-based national guidelines, the stroke code protocol, and multiple online courses for health professionals to improve treatment opportunities and communication campaigns to increase symptoms recognition in the population. Research about stroke epidemiology and care in the country helped in the decision of the MOH to propose the National Stroke Action in Plan in 2014, which defines prehospital, acute and hospital care as well as ambulatory and rehabilitation care for all patients with stroke. The MOH has also recently published the neurological network management model of care for stroke patients, which includes service provision, organization and structure of the network, support systems and monitoring plan that will serve to support the implementation of the [proposed model](#). The country offers IV thrombolysis in private hospitals and academic medical centres since 1996 (nowadays 34); in public hospitals since 2009 (nowadays 47 public hospitals, and in 15 of them this service is provided using telemedicine), organized stroke care (stroke units) in some hospitals since 2005 and thrombectomy in 8 public (only in centres with at least 50 thrombolysis per year) and 12 private hospitals. The strategies implemented translate into a reduction in the adjusted mortality rate from 47.32 to 33.3 in 2005 and 2015 respectively (per 100,000 people, adjusted by age and sex) largely due to a reduction of case-fatality rate from 33 to 23% at 6 months.

### Colombia

Since 2015, the Colombian Network against the Cerebrovascular Attack (RECAVAR) and the Colombian Association of Neurology have been able to influence public policies for stroke by creating national

guidelines for diagnosis and treatment of stroke in adults (2016) and the Regulation of Integral Route of Attention (RIAS) for stroke was created. The development was substantial in the last few years but initially only in private hospitals. Currently, the country has 82 stroke centres, 65 private and 17 public. Thrombectomy is available in 32 private hospitals and only 3 public. The country has few neurologists, and the stroke services are created integrating the emergency physicians. An important experience occurred in Bogotá, the capital of the country with the creation of the Stroke Subred Norte, the first public network for stroke in Colombia. The network started in 2019 with 1 public essential stroke centre - built step by step by only 1 stroke neurologist integrating the emergency physicians and the pre-hospital care. Now, the service has 6 neurologists, 2 neurology resident six months a year, 10 beds stroke units connected with 24 minimal stroke services without reperfusion therapy, but trained for basic stroke unit protocols and to transfer the patients through to the ambulance within the time window for thrombolysis. Also, the network is integrated with a private hospital to transfer the candidates for mechanical thrombectomy. The number of patients submitted to reperfusion therapy increased from 2 in 2019, the first year of the project, to 85 at the end of 2021. And from no patients taken to mechanical thrombectomy in the first two years of the experience to more than 50 in the last year since the start of the public-private stroke network with the allied institution. In 2022 the Colombian Alliance for Stroke was founded, working with the MOH to implement more public networks following the same model.

### *Uruguay*

As agreed in the Latin American Stroke Ministerial Meeting in Gramado, Brazil, in 2018,<sup>32</sup> where it was decided to carry forward a strong campaign to reduce the high impact of stroke in Latin America, a specific department responsible for devising a National Stroke Plan was established within the Ministry of Health of Uruguay<sup>40</sup> following the Declaration of Gramado.<sup>41</sup> Scientific associations, universities, scholars, and patient organizations, both at national and international level, took part in devising it. This ends with the generation of the national stroke management guidelines which were accompanied by presidential regulatory decrees and several ordinances that set the foundations of the legal framework for their implementation as of 2020. Forty-two Essential Stroke Centres and 7 Advanced Stroke Centres were strategically established and linked to ensure compliance with international accessibility recommendations, offering, in turn, the required training for their health care teams. A prehospital care protocol was also created for all countrywide mobile units. Stroke was included as a “Care Goal (objective)” for the whole Health System, providing the involved health care organizations with a financial incentive for compliance with the basic objectives related to the treatment of hyperacute stroke. The National Plan started operating during the COVID-19 pandemic and, considering the special circumstances imposed, it made it possible to maintain hyperacute medical care and increase population access to recanalization treatment, particularly mechanical thrombectomy. The reimbursement is paid by the MOH for public and private hospitals after reviewing all performed cases and monitoring the outcomes.

### *Egypt*

The first Stroke Unit in Egypt was founded in 1996 in a public university hospital but the acute stroke treatment with IV thrombolysis started in 2014 in this Stroke Unit. They measured the gaps of pre-hospital and the hospital delays, implemented plans to overcome the problems found, started thrombolysis with donated medications. With the results presented to the MOH, in 2016 thrombolysis was approved in the country. This was the drive to change stroke services in Egypt, with all other Egyptian universities attempting to follow the same path as that of the first SU. In 2020, 95 stroke

units with acute treatment were available in the country.<sup>42</sup> In 2018 thrombectomy was approved and telemedicine was started for remote areas.

### *Ethiopia*

Ethiopia is a low-income country with 118 million inhabitants. Stroke is the first cause of death responsible for 13% of all deaths.<sup>43</sup> The thrombolytic drug is not available in the country and the country had no structure for acute stroke care. In March 2021 Ethiopia asked to the WSO for help to develop acute stroke care. We accepted the challenge to create a model for acute stroke care in a low-income country. The steps were: 1. Creation of an African Task Force with 16 WSO future leaders members and 1 mentor (SM); 2. Define what hospitals would participate – we decided 3 hospitals because we identified champions to run the project in these hospitals; 3. Meeting with neurologists and directors of hospitals to discuss the program; 4. Evaluation of hospitals' structure through WSO Roadmap; 5. Evaluation of hospitals' structure through virtual visits; 6. Request for a grant to support the project (to buy and export thrombolytic medication – Alteplase), to pay a person to collect data, to create and implement a teaching course tailored to the region (supported by the WSO, Angels initiative and Allm Company); 7. Request for a telemedicine App for free, and creation a team of international expert volunteers to give in real time consultation for Ethiopia (telestroke without borders); 8. Creation of an acute stroke unit; 9. Started data collection since October 2021 to have a baseline before the implementation of program, including collecting cost of stroke care; 10. Started education for the population (World Stroke Campaign); 11. Started discussions with Minister of Health to support the program; 12. In person training (hands on, simulation, in August 2022 at the Global Stroke Alliance). The entire team is trained, the data collection started, the stroke units were opened, the alteplase arrived there 1 month ago, the telestroke without borders is ready and waiting for the first patient. Besides thrombolysis, the whole quality of care has already improved with stroke units' protocols.

### **Global initiatives for acute stroke care**

*The Angel's Initiative* is a non-promotional Health Care initiative of Boehringer Ingelheim, which aims to decrease the inequity of patients' access to high quality stroke care. In partnership with international (i.e., WSO) and national stroke societies, 140 Angels consultants are working with hospitals and health care professionals to create more and better stroke centres, by standardizing processes, implementing best practice and quality monitoring. A global network of 105,000 stroke care specialists from 7,600 hospitals have already joined the Initiative, 75% of them from LMICs. More than 1,300 hospitals have started with stroke treatment and 3,000 have reached Angels Awards for advanced treatment quality.<sup>44-46</sup>

*Mission Thrombectomy 2020+ (MT2020+)*: Mechanical Thrombectomy is a potent therapy for acute large vessel occlusion in stroke that is cost-effective.<sup>47,48</sup> Mission Thrombectomy 2020+ ([MT2020+](#)) is a worldwide campaign implemented by a global peer network of stroke and thrombectomy practitioners since 2016 - the Society of Vascular and Intervention Neurology (SVIN) - to accelerate access to thrombectomy using public health interventions.<sup>49</sup> Recent survey data show minimal access to this powerful therapy, with a global median access rate of 2.79% and 0.48% in LMICs. MT2020+ uses global thrombectomy research, policy advocacy tools, stakeholder and public education, strategies to accelerate thrombectomy workforce training, and developing thrombectomy systems of care with an emphasis on resource-limited settings.<sup>50</sup> These activities are implemented through the MT2020+ coordinated network of country-based regional committees. The campaign uses a metric of doubling thrombectomy rates in each region every two years.<sup>50</sup>



*Latin American Stroke Ministerial Meeting:* The large and increasing burden of stroke in Latin American countries, and the need to meet the United Nations and WHO requirements for reducing the burden of non-communicable disorders brought together stroke experts and representatives of the Ministries of Health of 13 Latin American countries for the 1st Latin American Stroke Ministerial meeting in Gramado, Brazil in August 2018.<sup>125</sup> This meeting discussed the problems and identified ways of cooperating to reduce the burden of stroke in the region. The meeting culminated with the adoption of the Declaration of Gramado,<sup>32</sup> signed by all Ministerial officials and stroke experts. With agreed priorities for stroke prevention, treatment, and research, an opportunity now exists to translate this Declaration into an action plan to reduce the burden of stroke, and since 2018 the countries have followed the Declaration to implement their plans. The commitments and achievements were reviewed in the 2<sup>nd</sup> meeting in 2020<sup>143</sup> and the 3<sup>rd</sup> meeting in 2022 showed a huge improvement in the region with governments and specialists working together in the implementation plans. In the [2022 Global Stroke Alliance meeting in Sao Paulo](#), 17 countries including the Caribbean region and seven Ministers of Health participated in the discussion.

*Global Stroke Alliance:* The Global Stroke Alliance<sup>51</sup> was created and led by the WSO with the goal of stimulating a global alliance to improve stroke care worldwide and discuss the best strategies for implementing evidence-based interventions at all levels of the care continuum (prevention, treatment, rehabilitation). Bringing together leaders from several countries with experience in implementation, the initiative involves stroke specialists, researchers, health professionals, health managers, scientific societies, public and private hospitals, patient associations, and industry, all working in the same direction: the improvement of stroke care, prevention, and research. The initiative was launched on March 10-13, 2020, in Rio de Janeiro and brought together leaders from 20 countries from different parts of the world with extensive experience in organizing stroke systems of care. The meeting achieved its goal of disseminating knowledge, exchanging experiences, and creating action plans adapted to each region. The dynamics of the event included forums on research, policy, logistics, and education. The 2<sup>nd</sup> Global Stroke Alliance meeting in São Paulo, August 2022, gathered 1,200 participants from 26 countries to focus on implementation of best practices in stroke care across the care pathway. The meeting drew seven Ministers of Health representing countries across Latin America to build policy commitment to implementation of evidence-based stroke strategies across the region and to support accountability around the commitments made at the first Global Stroke Alliance meeting in 2020. On the first day of the meeting each Minister gave an update regarding the stroke situation in their country and on the progress made since 2020. These strategies showed that in Latin America governments and societies together can reduce the incidence and consequences of stroke, through actions based on scientific evidence that support decisions on healthy public policies and sustainable human development. The commitments will be reviewed in 2023 in Uruguay, invited by the Ministry of Health. Based on the clear success of the Global Stroke Alliance's focus and format for building multi-sectoral engagement in quality stroke care delivery, the WSO will be moving on to expand the approach around the world on a regional basis. The next meeting is scheduled to take place in India in 2023.

*WSO Certification of Stroke Centres program:* Certification of stroke centres is critical to ensure that hospitals implement and monitor all priority evidence-based strategies that change the natural history of stroke, reducing mortality and disability. It is a great opportunity for continuous improvement of services and qualification of comprehensive assistance in the region, with the commitment of stroke centres as organizers and trainers of the entire local network. The WSO / Ibero-American Stroke Society (SIECV) [certification of stroke centres](#) was launched in March 2021 as a priority step to guide national stroke care by evidence-based pathways in the region. The program is based on the WSO Roadmap for Quality of Stroke Services. The certification bases were structured by experienced WSO

and SIECV members working in collaboration with the Society of Vascular and Interventional Neurology / Mission Thrombectomy together with country Medical Societies and Health Managers. Committees were created in 13 Latin American and Caribbean countries (Argentina, Brazil, Chile, Colombia, Costa Rica, Ecuador, Panama, Paraguay, Peru, Mexico, Uruguay, Jamaica, and Dominican Republic) supported by an international team of stroke experts, currently with 80 people working on the implementation of the program. The Certification is free of charge for the hospitals. The step-by-step process for certification includes the following:

- Self-Assessment tool – to facilitate the evaluation of the status of hospitals and the needs for improvement before applying for certification
- Application for certification on the web platform: all mandatory items are considered minimal requirements for classification to each category (hospitals will be classified as Essential and Advanced). Beyond the mandatory requirements, hospitals will need to reach at least 75% of recommended elements to get certification
- If the system confirms the criteria for certification, the hospital should submit several documents to the platform and an onsite visit will be scheduled
- The stroke team should be certified for stroke care, and the quality monitoring through a quality indicators registry is fundamental
- After the onsite visit an international board review will confirm the final certification.

In 18 months, 38 hospitals in 8 countries were certified. Thirty-four are in the process of submitting documents and the whole region is improving the quality of the hospitals interested in receiving certification. The program is planned to be expanded to India in 2022.

*RES-Q and SITS-QR:* To monitor the quality of acute stroke care is fundamental. A nationwide registry and essential quality control instrument of all patients with stroke admitted to hospitals should be implemented with a minimum dataset.<sup>32</sup> Free international registries are available, such as Registry of [Stroke Care Quality – RES-Q](#), or the Safe Implementations in [Treatments in Stroke – SITS-QR](#) and have been used in several countries. There are examples of open-source databases that can be implemented for free by clinicians, allowing for simple set up of a regional or national database if a free-standing platform is preferred. Data dictionaries can be aligned with other international databases to make international benchmarking feasible.<sup>51</sup>

*WSO Implementation Task Force:* Launched in 2022, the WSO created a strong group of implementation experts from all continents to support professionals and governments in the implementation of stroke prevention, acute care, and rehabilitation. The Task Force will work closely with the *Lancet* Commission Commissioners in implementation the program worldwide. The initiative is based on the following:

- The use of online WSO Roadmap to evaluate the country hospitals situation
- Expert groups to advise on the regional or national plans for implementation of stroke centers working together, which may include the Angels Initiative that will visit the hospitals and coach them to implement the plan locally
- WSO Certification Program to ensure the implementation of all evidence-based strategies in stroke centres with onsite visits
- RES-Q or SITS-QR or national registries to support quality monitoring for the Certification Program
- Expert groups to advise the local plans for a rehabilitation program



- Experts' groups working together with WHO for implementation of the HEARTS Program, with the reorganization of prevention in Primary Care Units across the globe, with the stroke centre as the core of the initiative
- Free online teaching course to support education of all stroke care through World Stroke Academy Platform
- Global Stroke Alliance Meeting rotating through the world to join countries in individual regions discussing the gaps, possible solutions and how to work together.

*American Stroke Association Programs: Get with the Guidelines and Target: Stroke:* The American Heart Association (AHA) and its American Stroke Association (ASA) division, have run a suite of quality-of-care improvement and stroke centre recognition and certification programs, including "Get With The Guidelines-Stroke (GWTG-S)", Target: Stroke, and, together with The Joint Commission in the US, four tiers of certification of stroke centres, for over two decades. GWTG-Stroke provides hospitals with tools to increase adherence to the evidence-based guidelines.<sup>52</sup> The registry includes more than 5 million stroke patient records, and hospitals can track performance on key quality indicators. These programs have led to measurable improvements in quality of care, including reductions in time to treatment with thrombolysis and endovascular therapy, throughout the US: 84% of eligible patients now receive thrombolytic therapy within 60 minutes of arriving at GWTG-S hospitals and 54% of eligible patients undergo mechanical thrombectomy within 90 minutes of arrival.

The original goals of Target: Stroke Phase 1 (2010-2013) were to ensure that at least 50% of alteplase-treated acute ischaemic stroke patients at participating hospitals were treated within 60 minutes of hospital arrival.<sup>53</sup> Ten key best practice strategies were identified, including (1) hospital pre-notification by Emergency Medical Services; (2) rapid triage protocol and stroke team notification; (3) single call/paging activation system for the entire stroke team; (4) use of a stroke toolkit containing clinical decision support, stroke-specific order sets, guidelines, hospital-specific algorithms, critical pathways, NIH Stroke Scale and other stroke tools; (5) rapid acquisition and interpretation of brain imaging; (6) rapid laboratory testing; (7) pre-mixing medication; (8) rapid access to intravenous alteplase; (9) a team-based approach; and (10) rapid data feedback to the stroke team on each patient's performance data. The second phase of Target: Stroke (2014-2018) was even more aggressive: door-to-needle (DTN) times within 60 minutes for 75% of eligible patients and DTN times within 45 minutes for 50% of eligible patients. Among 154,221 patients receiving thrombolysis within 3 hours of stroke symptom onset at 913 GWTG-Stroke hospitals in the US, median DTN times decreased from 78 minutes before Phase 1 to 50 minutes by the end of Phase 2, and the proportion of patients with DTN≤60 minutes increased from 26% to 69% ( $P<0.001$  for both comparisons).<sup>54</sup> By the end of Phase 2, 75% had achieved 60-minute and 52% 45-minute DTN goals. There were also significant reductions in mortality and haemorrhagic complications, and higher rates of discharge to home. The third phase of Target: Stroke focuses on further improving acute care, including the time for delivery of endovascular therapy.

Based on this success, the AHA/ASA has partnered with international stroke organizations, including the Middle East and North Africa Stroke Organization (MENASO) and the Chinese Stroke Centre Alliance, to bring these approaches to other countries, as well. For example, the ASA is partnering with MENASO to offer primary and secondary stroke centre certification to hospitals in the Middle East and North Africa.

## Telemedicine for Stroke from Brazil to Ethiopia

### Pilot Phase:

- A pilot programme for telemedicine in stroke in Brazil was implemented in 2008 together with the Ministry of Health in an Emergency Hospital without neurologists in Canoas, a southern city of Brazil covering a population of 323,827 inhabitants. The emergency physician did the first evaluation, called the telestroke team composed of stroke neurologists, who in real time reviewed the neurological examination through a webcam installed in the CT room, and evaluated the CT scan through software installed in the scanner in the hospital, both connected to a laptop. The stroke neurologist helped the doctor in the hospital in the decision of acute treatment including intravenous (IV) thrombolysis. In one year, 56 patients were evaluated and 35 were treated with IV thrombolysis. The median baseline NIHSS score was 10 (IQR 7–13), 57% (20/35) of the patients were independent after 3 months (modified Rankin scale: 0–2), 2.9% (1/35) had symptomatic intracranial haemorrhage, and 5.7% (2/35 patients) died. These good results were similar to the international results of IV thrombolysis and were responsible for the approval of telemedicine by the Ministry of Health for stroke in Brazil but without a specific funding for it.<sup>33</sup>

### Development of conventional telemedicine:

- In 2016 a private hospital in the southern part of Brazil created a programme connected to 6 public Ministry of Health essential stroke centres, none of which had a neurologist. The neurologists on duty in the emergency room (ER) at the private hospital were responsible for advising the telestroke programme. Two of the public hospitals had started to treat stroke patients with IV thrombolysis by emergency physicians before the telemedicine programme. They treated 14 patients in one year before the telemedicine and 74 in one year after the implementation of the programme showing that the specialist giving support probably increased 5.3-fold the number of treated patients. In two years, the programme was activated for 324 cases in the 6 hospitals and 179 were treated with IV thrombolysis (55%) confirming the same international safety and good outcomes.
- Despite the good results of the pilot project completed in 2009 and international studies showing the benefits of telemedicine, due to a huge lack of stroke centres in several areas of Brazil (due to lack of neurologists to cover all hospitals 24 hours/day, 7 days/week and other reasons), from 2010 to 2019 only 26 hospitals developed telemedicine programmes (20 private participants of a private network of hospitals and 6 public hospitals mentioned before connected to a private hospital).

### Migrating to a Mobile Telestroke program:

- The cost of traditional telemedicine continues to limit its more widespread use in LMIC, including in Brazil. Since 2014, Brazil started to use a Health Insurance Portability and Accountability Act compliant, low-cost smartphone application system (JOIN App; Allm, Tokyo, Japan) for the rapid sharing of clinical and neuroimaging patient data to connect the stroke team and to help in the decision-making process in acute stroke care. The validation of this app with 442 acute stroke patients to connect the stroke team in- and outside the hospital aiding in the treatment of acute stroke, including the decision of thrombolytic treatment was published in 2020.<sup>37</sup>
- In 2019 a Brazilian Stroke Network telestroke programme using the Join App, was created with 9 stroke neurologists connected to give support in real time to the new essential public stroke

centres without neurologists. The programme is sponsored by the Angels Initiative and Allm Company and in three years already cover 30 hospitals in 9 states. In this period the response time from the neurology team was 2 minutes, there were 2032 cases, 1596 were strokes, 1361 ischemic strokes and 661 thrombolysis. From the patients treated with thrombolytic therapy only 2% had symptomatic intracranial haemorrhage. With this programme it was possible to implement 30 more stroke centres in the country increasing access to thrombolytic therapy. 10 more hospitals are in preparation.

- This experience in Brazil was translated to Ethiopia in a WSO African Task Force initiative to implement acute stroke care in the country. To support this initiative a Telestroke without Borders programme was created using the Join App to connect WSO experts from Canada, the United States, Brazil, Spain, Belgium, Malaysia, India, and Egypt, as volunteers to support in real time the acute stroke care in 3 hospitals in Ethiopia where essential stroke units and thrombolytic medication was implemented for a pilot project. Telemedicine has been working since January 2023 and in two months the first 4 patients were treated with thrombolytics with good results.

### Barriers and Facilitators of Rehabilitation Services

Recent advances in stroke rehabilitation have not translated to marked improvement in DALYs globally especially in LMIC. Frameworks in implementation science utilize behaviour change as the cornerstone on which evidence-based practices can be actualized.<sup>55</sup> Factors that interact to generate behaviour are grouped as: educational and physical capacity of the individual, the individual's motivation – determined by habits and emotional response, and both physical and social external facilitators as summarized by Michie's COM-B system.<sup>5</sup> Barriers and facilitators of behavioural change can be unravelled by applying these factors to the relevant stroke care stakeholders – patients and carers, healthcare professionals, funders and policymakers, at individual level, community level, and population level.<sup>56</sup> This will facilitate the design of pragmatic solutions.

At the level of the patient and their caregivers, barriers identified include limited capability (awareness, effective education, late presentation),<sup>57</sup> low motivation (safety concerns, cultural bias, poor cooperation), and lack of opportunity due to external factors (road access, inefficient transportation, poor referral process, limited workforce, out-of-pocket payment).<sup>58</sup> Recent systematic review and survey of stroke services corroborated low awareness of rehabilitation services in numerous LMICs.<sup>2,59</sup> In a systematic review of 347 RCT in stroke rehabilitation/intervention in LMICs the financial aspect was also a major barrier.<sup>60</sup> The persistence of out-of-pocket payment in many LMICs implies that stroke survivors are unlikely to fund or pay the care they need. In the advent of home-based rehabilitation, funds to acquire required materials like specialized mattresses, continence aids, medications, and payment for home visits for therapists or nurses are barriers.

Another major barrier is the inadequate number and capability of healthcare providers in low resource settings viz-a-viz clinical competence, multidisciplinary care, and practical skills. This may have resulted from deficient medical curriculum and dysfunctional health systems.<sup>61,62</sup> There are limited organized training and certification/quality assurance programs on relevant rehabilitation techniques e.g., assessment of balance and risk of falls. Low motivational factors, especially in low resource settings, leads to negative provider behaviours with practices like absenteeism, poor communication,

discourteous treatment of patients, all of which leads to distrust by the clientele and reduced service utilization.<sup>57,62</sup>

The negative effects of these actions are particularly marked in low resource setting as the healthcare system there is heavily dependent on individual performance – a healthcare system already stretched from high disease burden and workforce shortages.<sup>62</sup> Systemic and extrinsic factors underlying these challenges – inadequate manpower, poor economy, insecurity, political instability – are also barriers on their own. Many interventions which do not require high technological gadgets and are cost-effective tend to be labour intensive e.g., constraint-induced movement therapy, mirror therapy, and task-oriented training.<sup>60</sup> Therefore, these interventions may not be implementable in LMICs unless the shortage of this category of health-workers is addressed.<sup>57</sup>

Policy makers, funders, and implementation partners in stroke care operate at an organizational level with the goal of addressing ineffective and inefficient rehabilitation structures and processes. This includes provision and distribution of rehabilitation infrastructure, facilities, workforce, supplies, and guidelines – all of which require urgent improvement.<sup>63,64</sup> Worthy of note is the lack of insurance coverage and financing for rehabilitation services in low- and middle-income countries. For example, in the Indian National Programme for Prevention and Control of Cancer, Diabetes, Cardiovascular Diseases and Stroke, funding allocation for rehabilitation-related activities in the 85000 million rupees (approximately US\$105M) allotted between 2012-2017 for the NPCDCS program is missing.<sup>65,66</sup>

Where clinical practice guidelines exist, emphasis was not placed on pragmatism and adaptable solutions.<sup>16</sup> Knowledge translation is not realistic where structures for successful implementation are not available. There is a need to focus on adapting clinical evidence to local context to ensure actionable recommendations. An example of such a project is the Global Consortium on Stroke rehabilitation currently evaluating the available LMIC clinical practice guidelines against AGREE-II and AGREE-REX criteria followed by WSO guidelines. The cost of staff and equipment required – intermittent pneumatic compression devices, functional electrical stimulator, gymnasium – are unaffordable by a number of hospitals unlikely to invest in such projects due to fear of being unprofitable. Keeping up with current rehabilitation trends and participating in the investigation of experimental interventions such as robotic rehabilitation and brain computer interfaces may be difficult in LMICs as funds for setting up such facilities are astronomical.<sup>60,67</sup> Thus, over 90% of randomized control post-stroke rehabilitation trials are done in HICs.<sup>60</sup>

Other system-level barriers preventing efficient use of the limited available resources include lack of clear care pathways, nonavailability of clinical prediction tools, dysfunctional referral systems, suboptimal information systems, absent task-shifting protocols, and inter-disciplinary disharmony in hospitals. On a larger scale, policy makers must address the poor economy, insecurity, and corruption which foster negative behaviour. Policy makers and implementation partners in an holistic ecosystem should co-create and rework funding, clinical governance and rehabilitation systems for in-hospital, community, and home-based, rehabilitation.<sup>68</sup>

### **Special Interest Group Clinical Pathways (SIG CP) of the WFNR organized an international survey**

The World Federation of Neurorehabilitation (WFNR) issued over 150 specific evidence-based stroke rehabilitation practice recommendations in 2021, developed by 14 multi-professional international author groups.<sup>69</sup> From June to August 2022 the Special Interest Group Clinical Pathways (SIG CP) of

the WFNR organized an international survey asking healthcare professionals (HCPs) involved in neurorehabilitation to indicate to what degree these practice recommendations can be implemented in their region (not necessarily in their institution or by themselves), and, if they could not be implemented as indicated, to provide information about the reasons why. Pre-defined categories of implementation barriers were shortage of HCPs, time, devices, lack of knowledge/skills among HCPs, lack of cost coverage, or that the service was not considered important for the region.

All members of the WFNR and previous attendees of the WFNR certificate teaching course on evidence-based stroke rehabilitation (held from January to May 2021) were personally invited to participate by e-Mail (May / June 2022) with a reminder sent after several weeks. A total of 66 participated in the survey and commented on at least the first recommendation of the survey. Supplementary Table 7 provides information about the participants, and the subgroups coming from High Income Countries (HICs) (29% of participants) or Low- and Middle-Income Countries (LMICs) (71% of participants), resp.

The respondents collectively covered a geographical distribution: 22 respondents (33%) came from the East Asia & Pacific region, 14 (21 %) from Europe & Central Asia, 10 (15%) from Latin America & Caribbean, 6 (9%) from Middle East & North Africa, 4 (6%) from South Asia, and 10 (15%) from Sub-Saharan Africa. Respondents were multi-professional (mainly medical doctors and physiotherapists) with a broad spectrum of age distribution, highest degree obtained, and years of professional experience with many having long-standing experience in clinical neurorehabilitation. Overall, the type of service included the “continuum of care” of healthcare services, i.e., from acute care to outpatient treatment. Comparing the subgroups coming from HICs or LIMCs indicated for the LIMCs a higher percentage of female responders, a higher percentage with a Bachelor’s degree and a lower percentage holding a Ph.D. Working in an early rehabilitation setting was less frequently the institutional background for respondents from LMICs compared to those from HIC; the reverse was true for working in a multidisciplinary outpatient service. While these differences were statistically significant, the overall characteristics of the two subgroups of HCPs were largely comparable.

It was then of interest to note to what degree the WFNR practice recommendations could be implemented, and whether that differed between HICs and LMICs. A first set of 7 recommendations addressing goal setting with the ICF (International Classification of Functioning, Disability and Health) and the multidisciplinary team approach in stroke rehabilitation was consistently commented on by survey participants. These results are reported here.

Specifically, the seven recommendations addressed the issues of the multidisciplinary team approach in stroke rehabilitation were (recommendation, REC 1), the early initiation of stroke rehabilitation on stroke units (REC 2) and its continuation after discharge (REC 3), the integration of HCPs involved and the co-ordination of their activities (REC 4), the evaluation of structure and processes of team work (REC 5), the use of the ICF for goal setting (REC 6), as well as goal syntax, patient’s perceptions of goal importance and self-efficacy (REC 7).<sup>70</sup>

Overall, implementation rates of about 60 to 80% (response categories *as indicated* or *regularly*, but *less than indicated*) were documented while in 20 to 40% of regional service situations implementation rates were insufficient (response categories *much less than indicated* or *cannot be applied*). This pattern was largely comparable between HICs and LMICs for most recommendations.

There were also however, significant differences between HICs and LMICs (Supplementary Table 8). The multidisciplinary team approach in stroke rehabilitation (REC 1) seemed to be a prevailing standard in HICs (95% of responses fell in the categories *as indicated* or *regularly, but less than indicated*) while the diversity of implementation was bigger in LMICs with 1/3 of situations without these pivotal aspects of stroke care (34% of responses in the category *much less than indicated*). A similar disparity between HICs and LMICs was observed for the implementation (or lack) of continuation of stroke rehabilitation after discharge (REC 3; only 6% of HIC respondents, but 26% of LMIC respondents rated *much less than indicated*).

Because of these inter-group differences, the frequency of potential barriers was compared between HICs and LMICs for REC1 and REC3.

The analyses for REC 1 indicated that a shortage of HCPs for the service was more frequently identified as barrier for the implementation of a *multidisciplinary team approach* in stroke rehabilitation among respondents from LMICs (REC 1, mean [95% confidence interval, CI] for *shortage of HCPs for the service* [range 0 – 1.0]: LMIC 0.64 [95% 0.50 – 0.78] (n=47), HIC 0.32 [95% 0.09 – 0.55] (n=19),  $P=0.0169$  (t test)). For REC 1, a *shortage of devices* was also noted by some LMIC respondents (LMIC 0.11 [95% 0.01 – 0.20] (n=47), HIC 0 [95% 0 – 0] (n=19),  $P=0.0237$  (t test, unequal variance).

For REC 3, *continuation of rehabilitation after discharge, a lack of knowledge/skills among healthcare professionals to provide the service* was more frequently indicated by participants from HICs (LMIC 0.21 [95% 0.09 – 0.33] (n=47), HIC 0.53 [95% 0.28 – 0.77] (n=19),  $P=0.0116$  (t test)). While this might seem contra-intuitive, the observation can be explained by the fact that in a situation where continuation of rehabilitation is implemented, the lack of specific knowledge for stroke rehabilitation among HCPs in the community setting might more frequently become an issue.

In summary, while the survey was limited as to the total number of respondents it was at the same time representative regarding the global distribution of participants, being multi-professional, frequently well experienced in neurorehabilitation, and working in different settings from acute care to outpatient rehabilitation. The lack of fundamental aspects of the team approach for stroke rehabilitation in 20 to 40% of healthcare settings globally raises concerns and points to a need to address such service deficiencies with a world-wide perspective. Given the ample evidence that the multidisciplinary team approach is a key factor in reducing stroke-related disability helping to prevent the need for institutionalisation after stroke makes this a topic of high priority.<sup>57</sup> In addition, the data indicates disparities between HICs and LMICs that help to focus on deficiencies at a regional level. This applies both to the establishment of interdisciplinary teams with specific training and experience in the field and the continuation of stroke rehabilitation after discharge in LMICs. Accordingly, there is a substantial need for capacity building in LMICs. And there is the question of HCPs' knowledge and skills for a multidisciplinary team approach in the community in HICs that needs to be addressed.

### Gaps in Stroke Rehabilitation Evidence-base

Overall, substantial evidence from clinical research including RCTs and systematic reviews with meta-analyses of RCTs is available to guide clinical decision making in certain areas of post-stroke rehabilitation.<sup>69,71</sup> Cochrane review evidence clearly indicates that stroke patients who receive organized multi-disciplinary inpatient (stroke unit) care with a team approach are more likely to be

alive, independent, and living at home one year after the stroke.<sup>72</sup> These apparent benefits were independent of age, sex, initial stroke severity, or stroke type, and were most obvious in units based in a discrete stroke ward.

Besides the overall benefit of coordinated stroke rehabilitation care there is substantiated evidence that certain rehabilitation interventions generate specific clinically relevant benefits for stroke survivors, examples being constrained-induced movement therapy to overcome the learnt non-use of the affected arm, arm robot therapy to improve function with more severely paretic arms,<sup>73</sup> electromechanical gait training to help regain the ability to walk independently,<sup>74</sup> or treadmill training with partial body weight support walking speed and endurance<sup>75</sup> to name just a few. It seems that the evidence-based motor rehabilitation has reached a status that can well inform clinical decision making, especially for the subacute phase (1-6 months post stroke)<sup>76</sup> and for High Income Country settings.

Systematic efforts are, however, rarely realized while too many small under-powered, low quality, single-centre clinical trials try to seek information more or less based on certain scientific grounds and having a minimal chance to be informative and authoritative. More collaborative and systematic research initiatives with neuroscientists, clinicians, and clinical epidemiologist populating the scene would be warranted to address the above-mentioned core gaps of stroke rehabilitation evidence in a systematic manner.

In addition, in order to generate such “universally applicable” primary evidence from clinical trials solidly grounded in neurorehabilitation, there is equally and consequently a high demand for healthcare research addressing how the evidence generated can best be contextualized and applied in various healthcare situations world-wide where considerable difference existed between the Low- and the High-Income Countries.

With increasingly high cost associated with clinical trials, certain clinical trials should be encouraged to be conducted in Low-Income Countries to generate applicable evidence to the specific populations in certain countries and regions. This requires more collaborative global efforts with certain global funding mechanisms in place in order to make it feasible, implementable, and executable. The logic would be that while the collaborative brain-oriented research (from basic science to clinical trials) would inform clinical decision making on “what” to do to best to reduce stroke-related disability, a second stream of geographically collaborative research would be necessary to test and prove “how” such knowledge could best be adapted to cultural and healthcare situations and implemented in different regions of the world to generate the best possible benefit for stroke survivors e.g., the Global Consortium on Stroke.

### **Gap Analysis of Stroke Rehabilitation Services and Settings**

Due to limited health resources, factors with the highest prevalence and largest effect should be identified based on the complexity theory<sup>77-79</sup> and addressed. Among the rehabilitation services recommended, expansion beyond physiotherapy services and improved access pose major challenges. Rehabilitation for stroke patients is generally less accessible compared with acute stroke care.<sup>80</sup> This is corroborated by a systematic review which reported generally low access to rehabilitation service in LMICs due to lack of awareness, logistics, affordability, and poor client-



provider interactions.<sup>59</sup> To expand rehabilitation services in low resource setting, task-shifting and task-sharing with trained caregivers and other non-specialist healthcare providers e.g., community health extension workers have been recommended. Nurse-led stroke aftercare addressing psychosocial functioning showed to be a low-cost intervention and is likely to be a cost-effective addition to care-as-usual. It plays an important role by screening and addressing psychosocial problems not covered by usual care.<sup>81</sup>

Another major gap is the lack of education of patients. This is a low-cost important intervention which can leverage the availability of smartphones and social media, through telemedicine/tele-education using training videos in various languages to support rehabilitation. This will need to be facilitated by affordable internet services, computer or mobile devices and quality assurance/ certification processes as well as care pathways and supervision. Also, if telehealth is to become a common mode of service delivery, health professionals need training in order to achieve successful implementation. Without this training, it is not surprising that therapists prefer in-person models of delivery to telehealth. Such training needs to go beyond technical expertise in operating telehealth platforms and navigating privacy, legislative requirements, and billing systems.<sup>82</sup>

Affordability is a major gap, particularly in LMIC. Promoting policies and health financing to improve rehabilitation services are crucial in the long term. Financing solutions should cover patient payment options for services (including health insurance), subsidized drugs and other interventions, health-provider remuneration, training and deployment, provision and maintenance of infrastructure, and administrative services. Also needed are development and promotion of relatively low-cost interventions, such as smartphone apps for fitness, exercise routines, language practice, and so on. Some interventions that augment behavioural therapy, such as transcranial direct current stimulation (tDCS), are also very low cost (e.g., about \$100 for a tDCS device), but clinicians need to be trained to use them. Considering inter-regional and intra-regional variation in stroke experience, and barriers and facilitators to stroke rehabilitation, multi-level health policy, fiscal solution, advocacy, and service delivery reforms are needed.<sup>80</sup> Therefore, there is a need for sensitization of all stakeholders within the *WSO-Lancet Neurology* Stroke Task Force (including policymakers, patients, caregivers, funders, implementation partners and healthcare providers) on the need, provision of and care pathways for rehabilitation services for stroke patients.

Outcome assessment is a critical component of rehabilitation services. Notably, there is a lack of consensus on the core set of outcome assessment tools. The wide variation in rehabilitation construct (e.g., motor function, muscle strength, cognition, perception, depression, at a body function level, ADL, and mobility scales at the activity level etc., as well as quality of life and participation) and their utility could lead to a lack of direction and focus during assessment, especially in LMIC where specialists are scant. While several outcome measures require specialized equipment for objective assessment, many questionnaire-based tools have been validated for use in HIC. However, they are not yet validated or readily used in LMIC.<sup>60</sup>

### **Pragmatic Recommendations from Guidelines**

A number of surveys have identified priorities and recommendations to enhance uptake of evidence-based stroke rehabilitation.<sup>83,84</sup> Results have shown socioeconomic and intra-country variations in priorities for and feasibility of practice change in stroke rehabilitation.<sup>84</sup> Improving interdisciplinary



care and access to health services globally are initiatives with global ramifications while development of relevant clinical practice guidelines remain a priority for low-resource settings.<sup>3,84</sup> Further studies should be conducted using the criteria and processes described here to identify local priorities both in stroke rehabilitation and implementation of research in their clinical areas. This will ensure efficient use of limited resources. It is important to harness resources to facilitate implementation, including toolkits to audit and facilitate interdisciplinary care, address consumer fatigue, and mitigate social isolation.<sup>83</sup>

In the interim, enhancing self-efficacy, supervised task-sharing with available personnel and *capable supported* family members *may* bridge the gap and help to deliver the required frequency and intensity of impairment- and task-oriented practice to facilitate neuroplasticity and recovery.<sup>85,86</sup> A few studies have shown the effectiveness of supervised home-based self-rehabilitation programs for improving upper-limb function.<sup>87</sup> The RECOVER trial showed nurse-led, digital supported, caregiver-delivered stroke rehabilitation programs did not improve patient physical functioning after stroke.<sup>88</sup> However, the results of the ATTEND trial raises some doubts on how far this can go.<sup>89,90</sup> But, task-shifting with continued supervision by rehabilitation professionals over prolonged periods of time should be studied. Therefore, randomized controlled trials are still required to investigate the effectiveness of task-sharing with a combination of outpatient rehabilitation supplemented by supervised family-based care for suitable patients. Future research should perhaps also investigate caregiver-mediated interventions combined with e-health and telerehabilitation services to augment training and allow adequate feedback.<sup>91</sup>

Indeed, rehabilitation can be offered in various settings including intensive care, inpatient care, outpatient care, community-based and family-based care. The Locomotor Experience Applied Post-Stroke (LEAPS) trial reported that home-based rehabilitation resulted in improvement in functional walking with the protocol used in the trial found to be more effective than the instrument-based intervention in institutionalized health rehabilitation centres, which are more expensive and not practical. In Nigeria, a few community-based interventions have yielded success at the primary healthcare level with reduction in disability.<sup>92,93</sup> Also, the caregiver-mediated intervention randomized controlled trial conducted in Taiwan showed improved functional outcome with family-assisted care under the supervision of a specialist.<sup>94,95</sup>

The gap in education on patient management and self-management could be targeted across all countries to improve management of stroke patients by developing educational tools (including videos and apps) that can be disseminated globally. Tele-rehabilitation could also provide support as in many LICs, distance is the main cause for not accessing proper rehabilitation services. The results from the recent trial prove that video conferencing systems to connect specialist in urban areas to healthcare specialist in the rural areas is feasible in LMICs.<sup>96</sup> This can also assist with task-sharing and task-shifting needed to cope with the strain on shortage of human resources in the health sector. This in combination with phone apps for monitoring can go a long way in LMIC communities whose residents have access to mobile phone.

To minimize cost and prolong life, it is critical to prevent complications such as pressure ulcers, aspiration, deep venous thrombosis, urinary tract infections and recurrent stroke. To achieve this, materials such as waterbeds, orthotics, wheelchair, Paul's tubing/urethral catheter, intermittent compressive pneumatic devices, and medications including anti-hypertensive, antidepressants, anti-

spasticity medications and heparin are required. Financing solutions including local manufacturing, health insurance systems and subsidies can improve access to these materials.

Meanwhile, better organization and optimization of available resources through care protocols is essential<sup>3</sup> globally, including in some HIC which lack standardized follow up care.<sup>97</sup> Standard protocols should include multiple assessments of functional impairment, fluid balance and nutrition, cognition, communication, mood disorders, and rehabilitation goals.<sup>98,99</sup> Most of the existing guidelines emanate from HIC. In the absence of alternatives, there is a need to adapt and implement them in LMIC settings until local evidence emerges. While they might be valid in terms of the evidence provided, they are purpose-made for HIC, and their recommendations reflect a combination of both evidence and HIC-based health-care systems. A major facilitator to overcome this barrier for implementation in LMIC is the regional adaptation of practice recommendations by making use of the evidence,<sup>60</sup> but actively transforming recommendations regionally into clinical pathways that reflect the local health care priorities, settings and capacities.<sup>71</sup> The ‘Key recommendations to improve stroke rehabilitation services worldwide’ presented in the tables below provide the means to do so.

## **METHODOLOGY OF GLOBAL STROKE ECONOMIC BURDEN ESTIMATES FOR 2050**

### **Step 1: Estimating Incidence and Deaths by Type of Stroke, by Country**

Feigin et. al. (2022) projected deaths and DALYs lost from stroke in 2050 globally (section 1 of the manuscript), by geographic region, and for populations aged over and under 60 years of age. However, the generation of the projected economic consequences of stroke (direct costs and income losses) required additional information at the country-level on incidence and deaths, given income losses typically rely on estimates of GDP per worker, and GDP per capita (for each country). Moreover, for most analytical purposes, methodologies for generation of income losses define 15-64 years as the working age group. Because we did not have access to the model parameters used to generate stroke incidence and deaths, we relied upon an alternative estimation procedure to estimate stroke incidence and deaths, and then calibrated our projections exactly equal to the projections of stroke deaths at the World Bank (income) region level used in our paper. The methodology used is set out below.

- Estimate separate cross-country models that regress DALYs lost from stroke, and stroke deaths in 2019 (by stroke type), on population size, the share of population aged 65 years and over, and regional dummies, with China and India treated separately – using Global Burden of Disease (GBD) data and information from the World Bank Development Indicators database, for 2019. The overall regression fit was good for all equations, with the coefficient of determination ranging from 0.91 to 0.97, depending on stroke type.
- DALYs lost and stroke deaths for 2050 were projected using the coefficients from the regression models outlined above, along with additional data on population projections for 2050 from UN population statistics by country, as well as the share of population over 65 years.
- Country-level projections for DALYs lost from stroke and stroke deaths were summed up over specific regions for which analogous data were available on stroke deaths and DALYs lost from stroke (by type of stroke).

- Projections of region-specific stroke deaths and DALYs lost from stroke were compared with analogous projections for 2019.<sup>19</sup> Our estimates were somewhat higher for High-Income Countries and for the South Asian region, potentially reflecting adjustments in mortality and improved stroke outcomes in these regions over time, that may have been better captured in Feigin et. al.<sup>19</sup> Therefore, country-specific 2050 projections were adjusted so that the total for DALYs lost from stroke and stroke deaths across countries within a region for 2050 exactly equalled the projected region totals reported in Feigin et. al.<sup>19</sup>
- Next, equations for incidence of stroke (by type) were estimated, with DALYs lost and deaths for that stroke type, along with region dummies as explanatory variables, using GBD data for 2019. The fit was again quite good, with the coefficient of determination ranging from 0.85 to 0.99. The coefficient estimates obtained were used to translate projected estimates for DALYs lost from stroke and projected stroke deaths for 2050 (after adjustment – see above) into projected incidence (by stroke type) in 2050 for each country.
- The number of incident cases of stroke who were aged between 15-64 years in each country was estimated using an age-specific variant of the model used to project incident cases for all ages (above). Because the projection required DALY estimates for 2050 and stroke deaths for 2050 for the age group 15-64 years, and Feigin et. al.<sup>19</sup> reported estimates only for 15-59 years and 60+ years (for DALYs lost from stroke and stroke deaths), the latter set of estimates was adjusted to capture estimates for 15-64 years. Specifically, the share of population aged 15-64 years in total stroke deaths was estimated by *adjusting upwards* the share of people 15-59 years old in stroke deaths (as in Feigin et. al.)<sup>19</sup> by the ratio of population aged 15-64 years to the ratio of population aged 15-60 years (using population projection data from the United Nations Population Statistics), and similarly, for DALYs lost from stroke.

## Step 2: Economic Data

- The projected annual economic burden of stroke was defined as the costs of acute care and treatment and rehabilitation following stroke *plus* income losses among incident stroke cases as outlined in the supplement.
- Projected unit costs of acute care and treatment and rehabilitation for 2050 for World Bank economic regions (and separately for China and India) were measured in 2017 US\$ and derived from estimates reported in Table 3 of the supplementary in Owolabi et. al.,<sup>1</sup> following conversion of purchasing power parity estimates into US\$ at 2017 prices. Two scenarios were considered for projecting the costs of treatment and rehabilitation. Under the first scenario, it was assumed that unit costs of acute care and follow-up treatment and rehabilitation rose at an annual rate that was 3% points above the non-medical inflation rate. In the second scenario, it was assumed that unit costs of acute care and follow-up treatment and rehabilitation rose at an annual rate that was 1% point above the non-medical inflation rate.
- The annual average rate of growth of real GDP per capita between 2020 and 2050 was estimated as follows. A simplified version of an empirical growth equation was estimated using cross-sectional data, with annual average rate of growth of GDP per capita (in 2015 US\$) during 1990-2020 as the dependent variable, and the log of baseline GDP per capita (i.e., GDP per capita in 1990 (in 2015 US\$)) (to capture “conditional convergence”), regional dummies, and rate of change of the share of population aged 15-64 years (to capture labour supply and demographic dividend effects) as the explanatory variables.<sup>100</sup> Then the annual average rate of growth of real GDP per capita for each country during 2020-2050 was projected using the

coefficients of the growth equation, a baseline value of the log of GDP per capita for 2020 (in 2015US\$), and the estimated annual average rate of growth of the share of population aged 15-64 years between 2020 and 2050 (using UN population statistics data). China was an outlier in the estimates with a projected annual average rate of growth (8.6%) that was much larger than for other countries and appeared unrealistic given its rapidly changing demographic scenario. China's projected growth rate was therefore adjusted downwards to reflect two scenarios: (a) an annual average rate of growth of real GDP per capita equal to the country with the second fastest projected growth – of 3.9% annually; and (b) an annual average rate of growth of real GDP per capita equivalent to that of High-Income Countries whose ranks China is expected to join prior to 2050 (1.2% per year).

The estimated annual average rate of growth of real GDP per capita during 2020-50, along with information on GDP per capita in 2020 (2015 US\$), was used to project real GDP per capita for each country in 2050 (in 2015 US\$). Information on the GDP deflator for the US for 2017 was then used to convert projected GDP per capita for 2050 (in US\$ 2015) to GDP per capita in US\$ 2017 terms.

Simultaneously, GDP per person aged 15-64 years for 2050 (in US\$ 2017) for each country was estimated by multiplying (projected) GDP per capita in 2050 (in US\$ 2017) with (1/share of population aged 15-64 years).

- It was assumed that the average age at which stroke occurred for people aged 15-64 years in 2050 was the same as in 2020. It was also assumed that the expected life span of people aged 15-64 years in 2050 with stroke was the same as in 2017. Because of the relationship between prevalence, incidence, and life expectancy at the time of stroke, this assumption is potentially problematic. Because stroke mortality can be expected to decline over time (to 2050), one may expect income losses and treatment expenses to be lower than estimated here.

### **Step 3: Translating data on costs of treatment and rehabilitation and expected GDP per worker into estimates of direct costs and income losses from incident stroke cases.**

- The methods used to project 2050 economic costs are exactly the same as reported in the supplementary appendix to Owolabi et. al. 2022.<sup>1</sup>
- Income losses were considered for two scenarios – one where China's GDP per capita grows at a 3.9% per year and one where it grows at 1.2% per year.
- Treatment and rehabilitation expenditures were considered under two scenarios: one where the annual rate of growth of the unit costs of acute care and follow-up treatment and rehabilitation exceeded the annual average rate of non-medical inflation by 1%, and one where they exceeded the annual average rate of growth of non-medical inflation by 3%.

## Evidence supporting the use of the Stroke Riskometer app for stroke prevention

1. Feasibility and efficacy: A pilot RCT in NZ<sup>101,102</sup> showed significant motivational value of the use of relative risk estimates for communicating stroke risk to users, high acceptability (84%), and potential efficacy of the lifestyle modification and improved awareness of stroke in the App Group (13%). There was decreased awareness of stroke by 8% in the Control Group, and an overall increase in the Life Simple's 7 score by 0.36 points (95% CI -2.10 to 1.38) from baseline to six months in the App group compared to almost no change in the LS7 in the Control group (0.01 [95% CI -1.34 to 1.32]), which equates to a projected 3% reduction in stroke incidence. Statistically significant improvement in stroke awareness (as measured by the validated Malay version of the ABCD-M questionnaire)<sup>103</sup> in the Stroke Riskometer app group compared to the usual care group was shown in a single-blinded RCT (n=116) in Malaysia<sup>104</sup> (efficacy paper is in preparation). Full-scale RCTs on the Stroke Riskometer app for stroke prevention are currently underway in Australia/NZ (PERKS International trial ID ACTRN12621000211864), and Brazil.<sup>105</sup>
2. Evidence from qualitative studies: A qualitative exploration demonstrated that Stroke Riskometer users acknowledge their relative risk of a stroke, the physical and socio-economic implications of a stroke and the importance of healthy lifestyle changes.<sup>106</sup> Our data suggest that long-term use of the Stroke Riskometer may be better facilitated when used in combination with other ongoing measures and interventions (e.g. having a peer support system from nurse educators or community health workers).
3. Validation: The Stroke Riskometer app has been validated in three populations (The Netherlands, Russia and NZ) against Framingham Stroke Risk Score and QStroke.<sup>107</sup> It was also cross-culturally validated in 13 countries (Australia, Brazil, France, India, Italy, Kazakhstan, Malaysia, NZ, Nigeria, Russia, Ukraine, UK, and USA).<sup>108</sup>
4. Endorsements: The Stroke Riskometer app is endorsed by the World Stroke Organization, World Federation of Neurology, World Heart Federation, European Stroke Organisation, and by a number of national stroke organisations (Australia, France, China etc.), and recommended for global use by the World Stroke Organization,<sup>109,110</sup> American Stroke Association and NCD Alliance.<sup>111</sup> In 2022, the app was awarded the WHO Western Pacific Innovation Challenge Prize.<sup>112</sup>
5. Global usage: currently used in 78 countries, this free to use app is already translated into 19 languages and available to over 5.3 billion people in their native languages.<sup>1</sup> A Google Scholar search list of articles that has mentioned the Stroke Riskometer app yielded 244 peer-reviewed publications, as shown below.

### Google Scholar search list of articles that has mentioned "Stroke Riskometer app" (in alphabetic order by first author name)

1. Abqari, U., van't Noordende, A. T., Richardus, J. H., Isfandiari, M. A., & Korfage, I. J. (2022). Strategies to promote the use of online health applications for early detection and raising awareness of chronic diseases among members of the general public: A systematic literature review. *International Journal of Medical Informatics*, 104737.
2. Akinyemi, R. O., & Adeniji, O. A. (2018). Stroke care services in Africa: a systematic review. *Journal of Stroke Medicine*, 1(1), 55-64.
3. Akpa, O., Sarfo, F. S., Owolabi, M., Akpalu, A., Wahab, K., Obiako, R., . . . Ovbiagele, B. (2021). A novel afrocentric stroke risk assessment score: Models from the siren study. *Journal of Stroke and Cerebrovascular Diseases*, 30(10) doi:10.1016/j.jstrokecerebrovasdis.2021.106003

4. Aksyutina, N. V., Shulman, V. A., Nikulina, S. Y., Nazarov, B. V., Maksimov, V. N., Plita, E. V., . . . Vereshchagina, T. D. (2015). Clinical-genetic riskometer for the ischemic stroke risk assessment in atrial fibrillation. *Russian Journal of Cardiology*, *126*(10), 42-45. doi:10.15829/1560-4071-2015-10-42-45
5. Alamri, Y. (2019). Changing time for acute stroke management: What comes after dawn? *Neurosciences Journal*, *24*(2), 142-142.
6. Alexander, V., Siregar, Y., & Arina, C. A. (2020). Sumatera Medical Journal.
7. Aljamani, H. (2016). Tablet PC Usability Using Motion Capture in a Simulated Clinical Setting.
8. Al-Kuraishy, H. M., Al-Gareeb, A. I., & Naji, M. T. (2020). Brain natriuretic peptide in patients with acute ischemic stroke: Role of statins. *Biomedical and Biotechnology Research Journal (BBRJ)*, *4*(3), 239.
9. Allès, B., Pouchieu, C., Gruber, A., Lebailly, P., Loiseau, H., Fabbro-Peray, P., . . . Kim, H.-B. (2016). New Zealand Applied Neurosciences Conference. Auckland, New Zealand, November 24-26, 2016: Abstracts. *Neuroepidemiology*, *47*(3-4), 125-144.
10. Alsabhen, F. (2016). Health Website Usability Including a Motion Capture Study.
11. Amann, J. (2021). Machine Learning in Stroke Medicine: Opportunities and Challenges for Risk Prediction and Prevention. *Artificial Intelligence in Brain and Mental Health: Philosophical, Ethical & Policy Issues*, 57-71.
12. Amann, J. Machine in Medicine: Opportunities and Challenges for and.
13. Antonenko, K., Paciaroni, M., Sokolova, L., & Pezzella, F. R. (2021). Digital health in stroke medicine: what are the opportunities for stroke patients? *Current Opinion in Neurology*, *34*(1), 27-37.
14. Aouad, A. (2019). Systup-plus study evaluation of stroke risk score by stroke riskometer tmo. *Journal of Hypertension*, *37*, e163-e164.
15. Archives, W. N., Photos, W. C. N., Calendar, M. Y., & Site, W. F. N. Candidates for the WFN 2015 Election.
16. Armas, A., Geduriagao, D., Torres, M. A., & Haro, E. (2018). Heart Beat. *Virtutis Incunabula*, *5*(01).
17. Arsovska, A. The Paper of the Month May.
18. Badawy, M. A. E. M. D., Naing, L., Johar, S., Ong, S., Rahman, H. A., Chong, C. L., & Tuah, N. A. A. (2022). Scoping review: Are CVDs risk calculators using the digital platform beneficial for CVDs prevention and management?
19. Badawy, M. A. E. M. D., Naing, L., Johar, S., Ong, S., Rahman, H. A., Tengah, D. S. N. A. P., . . . Tuah, N. A. A. (2022). Evaluation of cardiovascular diseases risk calculators for CVDs prevention and management: scoping review. *BMC Public Health*, *22*(1), 1-11.
20. Bakkegaard Kvamme, G. (2017). M-helse og applikasjoner innenfor rehabilitering av slagpasienter: Systematisk litteratur studie.
21. Bam K, Olaiya MT, Cadilhac DA, Donnan GA, Murphy L, Kilkeny MF. Enhancing primary stroke prevention: a combination approach. *The Lancet Public Health*. 2022;7:e721-e724
22. Baptiste, L., Brenière, C., Gueniat, J., Graber, M., Garnier, L., Delpont, B., . . . Giroud, M. (2017). If I had a stroke in 2018. *J Neurol Neurosurg*, *3*(4), 72-75.
23. Bardon, R., Meyer, N., Moore, S., Overholt, G., Peterson, G., Simon-Brown, V., . . . Stortz, P. J. (2009). Riskometer-voting with your feet. *Journal of Extension*, *47*(2) Retrieved from [www.scopus.com](http://www.scopus.com)
24. Béjot, Y., Daubail, B., & Giroud, M. (2016). Epidemiology of stroke and transient ischemic attacks: Current knowledge and perspectives. *Revue Neurologique*, *172*(1), 59-68.
25. Béjot, Y., Giroud, M., & Feigin, V. L. (2017). French version of the stroke riskometer™ app: A new tool to reduce the burden of stroke. *Revue Neurologique*, *173*(4), 179. doi:10.1016/j.neurol.2017.01.399
26. Beneš, I. (2019). Primjena suvremenih tehnologija u prevenciji moždanog udara.

27. Bhattacharjee, R., Krishnamurthi, R., Hussein, T., Purohit, M., & Feigin, V. (2015). The Stroke Riskometer: A new tool to measure and monitor stroke risk.
28. Bill, O., Faouzi, M. F., & Michel, P. M. (2015). Added value of acute multimodal CT-based imaging (MCTI): a comprehensive analysis.
29. Blek, N., Szarpak, L., & Drejza, M. (2018). The use of digital technologies in stroke management in the world: an analysis of examples. *Postępy Nauk Medycznych*, 31(6), 361-365.
30. Bonura, A., Motolese, F., Capone, F., Iaccarino, G., Alessiani, M., Ferrante, M., . . . Pilato, F. (2022). Smartphone App in Stroke Management: A Narrative Updated Review. *Journal of Stroke*, 24(3), 323-334.
31. Brainin, M., Feigin, V. L., Norrving, B., Martins, S. C. O., Hankey, G. J., & Hachinski, V. (2020). The world stroke organization's declaration for worldwide primary stroke and dementia prevention. *Annals of Clinical and Experimental Neurology*, 14(3), 5-9. doi:10.25692/ACEN.2020.3.1
32. Brainin, M., Feigin, V., Bath, P. M., Collantes, E., Martins, S., Pandian, J., . . . Teuschl, Y. (2019). Multi-level community interventions for primary stroke prevention: A conceptual approach by the world stroke organization. *International Journal of Stroke*, 14(8), 818-825. doi:10.1177/1747493019873706
33. Brainin, M., Feigin, V., Martins, S., Matz, K., Roy, J., Sandercock, P., . . . Wiseman, A. (2018). Cut stroke in half: polypill for primary prevention in stroke. *International Journal of Stroke*, 13(6), 633-647.
34. Brainin, M., Michael, B., Feigin, V., Valery, F., Norrving, B., Bo, N., . . . Hachinski, V. (2020). The World Stroke Organization's Declaration for worldwide primary stroke and dementia prevention. *Annals of Clinical and Experimental Neurology*, 14(3), 5-10.
35. Brainin, M., Teuschl, Y., & Martins, S. (2022). Polypill: Benefits Seen for Stroke and Other Outcomes. *Stroke*, 53(8), 2695-2701.
36. Brayne, C. (2020). Health inequalities in stroke and dementia prevention. *The Lancet Neurology*, 19(7), 567.
37. Cabral, N., & Conforto, A. B. (2015). Stroke: an ongoing revolution. *Arquivos de Neuro-Psiquiatria*, 73, 892-893.
38. Calculator, C. V. R. adhesion molecules, 24 adiponectin receptor 1, 22 adrenocorticotrophic hormone (ACTH), 273 aggressive behavior post-stroke, 274. imaging, 208, 9.
39. Camps-Renom, P. (2020). Nous marcadors de vulnerabilitat de l'ateroesclerosi carotídia en pacients amb ictus isquèmic.
40. Chandra, V. A., Siregar, Y., & Arina, C. A. (2020). Correlation of ACE Gene Polymorphism and Hypertension in Stroke Ischemic Patients. *Sumatera Medical Journal*, 3(1), 41-47.
41. Chao, B.-H., Yan, F., Hua, Y., Liu, J.-M., Yang, Y., Ji, X.-M., . . . Kang, D.-Z. (2021). Stroke prevention and control system in China: CSPPC-Stroke Program. *International Journal of Stroke*, 16(3), 265-272.
42. Charalambous, M., & Phylactou, P. (2021). The Stroke Riskometer App: The Greek Version. *International Journal of Stroke*.
43. Chen, Y.-H., & Sawan, M. (2021). Trends and challenges of wearable multimodal technologies for stroke risk prediction. *Sensors*, 21(2), 460.
44. Çizmecci, B., & Yayla, E. N. (2022). TC SAĞLIK BAKANLIĞI'NIN MOBİL SAĞLIK UYGULAMALARININ BİLİNİRLİĞİNE YÖNELİK BİR ARAŞTIRMA.
45. Cronjé, K. (2021). The Knowledge and Awareness of Clinical Health Science Students on Stroke Recognition and Management: University of Johannesburg (South Africa).
46. Dam, V., Baart, S. J., Scheres, L. J. J., Damen, J., Spijker, R., Schuit, E., . . . Moons, K. G. M. Cardiovascular risk prediction models for women in the general population: a systematic review. *This is a man's world...*, 135.

47. Danielsson, J., James, K. R., Valenzuela, M., & Zer, I. (2016). Can we prove a bank guilty of creating systemic risk? A minority report. *Journal of Money, Credit and Banking*, 48(4), 795-812. doi:10.1111/jmcb.12318
48. Dao, T. N. HOBIT mobile application.
49. Dassanayaka, E., Subramaniam, S., Rajapaksha, R., Edirisinghe, S., Perera, M., Bandara, G., . . . Silva, N. (2016). ASSESSING THE USABILITY OF STROKE RISKOMETER (TM) TO EVALUATE STROKE RISK AMONG URBAN SRI LANKAN ADULTS.
50. De Oliveira, W. C. G. SISTEMA MULTIAGENTE FUZZY PARA MONITORAMENTO E AVALIAÇÃO DOS FATORES DE RISCO DO AVC.
51. Denham, A. M. J., Halpin, S., Twyman, L., Guillaumier, A., & Bonevski, B. (2018). Prevent 2nd Stroke: a pilot study of an online secondary prevention program for stroke survivors. *Australian and New Zealand Journal of Public Health*, 42(5), 484-490.
52. Dokova, K. G., & Feigin, V. L. (2022). Trends in Stroke Burden in Central and Eastern Europe from 1990–2019. *Neuroepidemiology*, 1-12.
53. Dubois, B., & Villain, N. (2021). Preclinical Alzheimer's or asymptomatic at-risk? *Journal of the Neurological Sciences*, 429.
54. Estol, C. J. (2015). Letter by Estol Regarding Article, "New Strategy to Reduce the Global Burden of Stroke". *Stroke*, 46(8), e194-e194.
55. Fauser, B., Boersma, H., Moons, K. G. M., & van der Schouw, Y. T. (2019). Cardiovascular risk prediction models for women in the general population: a systematic review. *Predicting Clinical Outcomes in Cardiovascular Diseases*, 14(1), 111.
56. Feigin, V. (2021). 7th International Conference on Neurology and Epidemiology (ICNE), Virtual Conference, March 19-20, 2021. *Neuroepidemiology*, 55(1), 1-106.
57. Feigin, V. (2021). Perspectives of mobile technologies. *Journal of the Neurological Sciences*, 429, 117926.
58. Feigin, V. (2022). Abstracts of the 8th International Conference on Neurology and Epidemiology 2022. *Neuroepidemiology*, 56(1), 1-100.
59. Feigin, V. L. (2017). Primary stroke prevention needs overhaul. In (Vol. 12, pp. 5-6): SAGE Publications Sage UK: London, England.
60. Feigin, V. L. (2019). Anthology of stroke epidemiology in the 20th and 21st centuries: Assessing the past, the present, and envisioning the future. *International Journal of Stroke*, 14(3), 223-237.
61. Feigin, V. L., & Norrving, B. (2014). A new paradigm for primary prevention strategy in people with elevated risk of stroke. *International Journal of Stroke*, 9(5), 624-626. doi:10.1111/ijss.12300
62. Feigin, V. L., Beghi, E., Bennett, D. A., Logroscino, G., Norrving, B., Feigin, S., . . . Barker-Collo, S. (2021). Official Journal of.
63. Feigin, V. L., Brainin, M., Norrving, B., Gorelick, P. B., Dichgans, M., Wang, W., . . . Wood, D. A. (2020). What Is the Best Mix of Population-Wide and High-Risk Targeted Strategies of Primary Stroke and Cardiovascular Disease Prevention? *Journal of the American Heart Association*, 9(3), e014494.
64. Feigin, V. L., Brainin, M., Norrving, B., Martins, S., Sacco, R. L., Hacke, W., . . . Lindsay, P. (2022). World Stroke Organization (WSO): global stroke fact sheet 2022. *International Journal of Stroke*, 17(1), 18-29.
65. Feigin, V. L., Feigin, V. L., Varakin, Y. Y., Ya, V. Y., Kravchenko, M. A., Kravchenko, M. A., . . . Tanashayan, M. M. (2015). A new approach for stroke prevention in Russia. *Annals of Clinical and Experimental Neurology*, 9(4), 19-23.
66. Feigin, V. L., Krishnamurthi, R., & Bhattacharjee, R. (2015). Putting your health in your own hands: A new strategy for primary stroke prevention.
67. Feigin, V. L., Krishnamurthi, R., Bhattacharjee, R., & Purohit, M. (2014). Stroke Riskometer App. Auckland, New Zealand: AUTEL of AUT University.



68. Feigin, V. L., Krishnamurthi, R., Merkin, A., Nair, B., Kravchenko, M., & Jalili-Moghaddam, S. (2022). Digital solutions for primary stroke and cardiovascular disease prevention: A mass individual and public health approach. *The Lancet Regional Health–Western Pacific*.
69. Feigin, V. L., Norrving, B., & Mensah, G. A. (2017). Global burden of stroke. *Circulation Research*, 120(3), 439-448.
70. Feigin, V. L., Norrving, B., & Mensah, G. A. (2017). Primary prevention of cardiovascular disease through population-wide motivational strategies: insights from using smartphones in stroke prevention. *BMJ global health*, 2(2), e000306.
71. Feigin, V. L., Norrving, B., & Mensah, G. A. (2017). Stroke Compendium. *Circulation Research*.
72. Feigin, V. L., Norrving, B., George, M. G., Foltz, J. L., Roth, G. A., & Mensah, G. A. (2016). Prevention of stroke: a strategic global imperative. *Nature Reviews Neurology*, 12(9), 501-512.
73. Feigin, V. L., Owolabi, M., Hankey, G. J., Pandian, J., & Martins, S. C. (2022). Digital Health in Primordial and Primary Stroke Prevention: A Systematic Review. *Stroke*, 29(2), 1008-1019.
74. Feigin, V. L., Roth, G. A., Naghavi, M., Parmar, P., Krishnamurthi, R., Chugh, S., . . . Ng, M. (2016). Global burden of stroke and risk factors in 188 countries, during 1990–2013: a systematic analysis for the Global Burden of Disease Study 2013. *The Lancet Neurology*, 15(9), 913-924.
75. Feigin, V. L., Stark, B. A., Johnson, C. O., Roth, G. A., Bisignano, C., Abady, G. G., . . . Abedi, V. (2021). Global, regional, and national burden of stroke and its risk factors, 1990–2019: A systematic analysis for the Global Burden of Disease Study 2019. *The Lancet Neurology*, 20(10), 795-820.
76. Feigin, V. L., Varakin, Y. Y., Kravchenko, M. A., Piradov, M. A., Tanashyan, M. M., Gnedovskaya, E. V., . . . Barker-Collo, S. (2016). A new approach to stroke prevention in Russia. *Human Physiology*, 42(8), 854-857. doi:10.1134/S0362119716080053
77. Feigin, V. L., Vos, T., Nichols, E., Owolabi, M. O., Carroll, W. M., Dichgans, M., . . . Murray, C. (2020). The global burden of neurological disorders: translating evidence into policy. *The Lancet Neurology*, 19(3), 255-265.
78. Feigin, V. L., Wang, W., Fu, H., Liu, L., Krishnamurthi, R., Bhattacharjee, R., . . . Barker-Collo, S. (2015). Primary stroke prevention in china – a new approach. *Neurological Research*, 37(5), 378-380. doi:10.1179/1743132815Y.0000000025
79. Feigin, V., & Brainin, M. (2019). Reducing the burden of stroke: Opportunities and mechanisms. In (Vol. 14, pp. 761-762): SAGE Publications Sage UK: London, England.
80. Feigin, V., & Theadom, A. Peer-reviewed articles accepted and published in 2016 (by lead author). *Neurology*, 85(9), 821-828.
81. Feigin, V., & Vos, T. (2019). The global burden of disease brain summit. *Neuroepidemiology*, 52, 3-16.
82. Feigin, V., Norrving, B., Krishnamurthi, R., Barker-Collo, S., Wang, W., Fu, H. U. A., . . . Mendis, S. (2015). Stroke Riskometer app: A new promising approach for primary stroke prevention and epidemiological research on stroke and other major non-communicable disorders (NCD) across the globe.
83. Fernandes, A. H. S. (2019). Comunicação funcional desenvolvida por indivíduos afásicos após AVC residentes na comunidade.
84. Ferrari-Souza, J. P., Brum, W. S., Hauschild, L. A., Da Ros, L. U., Ferreira, P. C. L., Bellaver, B., . . . De Bastiani, M. A. (2021). Vascular risk burden is a key player in the early progression of Alzheimer's disease. medRxiv.
85. Flueckiger, P., Longstreth, W., Herrington, D., & Yeboah, J. (2018). Revised Framingham stroke risk score, nontraditional risk markers, and incident stroke in a multiethnic cohort. *Stroke*, 49(2), 363-369.

86. Fonseca, A. C., & Savitz, S. I. (2022). Organizational Update: World Stroke Conference 2021. In: Am Heart Assoc.
87. Frielick, S. (2016). The LATTE Initiative at AUT.
88. Fruhwirth, V., Enzinger, C., Weiss, E., Schwerdtfeger, A., Gattringer, T., & Pinter, D. (2020). Apps in der Sekundärprävention nach Schlaganfall. *Wiener Medizinische Wochenschrift*, 170(1), 41-54.
89. Gall, S. L., Feigin, V., Thrift, A. G., Kleinig, T. J., Cadilhac, D. A., Bennett, D. A., . . . Krishnamurthi, R. (2022). Personalized knowledge to reduce the risk of stroke (PERKS-international): Protocol for a randomized controlled trial. *International Journal of Stroke*, doi:10.1177/17474930221113430
90. Gastouniotti, A., Golemati, S., Andreadis, I., Koliass, V., & Nikita, K. S. (2015). Cardiovascular disease management via electronic health. In (pp. 187-202): CRC Press.
91. George, S. A. (2021). Investigating the Modulators of Health Behaviour Change Using the Novel AUT Stroke Riskometer Application.
92. Gnedovskaya, E. V., Kravchenko, M. A., Prokopovich, M., Andreeva, O. S., Sergeev, D. V., Oshchepkova, E. V., . . . Piradov, M. A. (2016). Prevalence of the risk factors of cerebrovascular disorders in the capital city residents aged 40–59: a clinical and epidemiological study. *Annals of Clinical and Experimental Neurology*, 10(4), 11-19.
93. Gunawan, H., & Gunawan, I. (2018). A Modified NCD (Non Communicable Diseases) Stroke Posbindu Using Stroke Riskometer (TM) Application: The Newest and Promising Strategy for Primary Stroke Prevention in Indonesia.
94. Guo, Y. (2022). A New Paradigm of “Real-Time” Stroke Risk Prediction and Integrated Care Management in the Digital Health Era: Innovations Using Machine Learning and Artificial Intelligence Approaches. *Thrombosis and Haemostasis*, 122(01), 005-007.
95. Gupta, A. D., & Tripathi, M. Scientific Program Day 01, Thursday, November 10, 2016.
96. Hair, C., Sahathevan, R., Kraemer, T., Lau, M., Feigin, V., & Krishnamurthi, R. (2019). Doing the 1 in 6. The Ballarat Health Services stroke riskometer challenge.
97. Hankey, G. J. (2020). Population impact of potentially modifiable risk factors for stroke. *Stroke*, 51(3), 719-728.
98. Hendriks, J., Andreae, C., & Ågren, S. (2019). Helène Eriksson<sup>2</sup>, Carina Hjelm<sup>2</sup>, 5, Ulla Walfridsson<sup>2</sup>, 6, Chantal F Ski<sup>7</sup>, Ingela Thylén<sup>6</sup> and Tiny Jaarsma<sup>3</sup>, 4 on behalf of the CESAR network. *European Journal of Cardiovascular Nursing*, 1, 10.
99. Hendriks, J., Andreae, C., Ågren, S., Eriksson, H., Hjelm, C., Walfridsson, U., . . . Jaarsma, T. (2020). Cardiac disease and stroke: practical implications for personalised care in cardiac-stroke patients. A state of the art review supported by the Association of Cardiovascular Nursing and Allied Professions. *European Journal of Cardiovascular Nursing*, 19(6), 495-504.
100. Hill, V. A., & Towfighi, A. (2017). Modifiable risk factors for stroke and strategies for stroke prevention.
101. Hippisley-Cox, J., Coupland, C., & Brindle, P. (2015). Concerns on “Validation of a Data Collection Tool and Stroke Risk Predictor”. *International Journal of Stroke*, 10(7), E82-E82.
102. Hodge, A.-L. (2019). Effect of rehabilitation on long-term outcomes after stroke: Results from a population-based study.
103. Hojjati-Emami, K., Dhillon, B. S., & Jenab, K. (2014). Stochastic risk assessment methodology and modeling as an in-vehicle safety enhancing tool for younger drivers on roads. *Journal of Transportation Safety and Security*, 6(4), 301-320. doi:10.1080/19439962.2013.874388
104. Hunaifi, I., Harahap, H. S. i., Sahidu, M. G., Suryani, D., Susilowati, N. N. A., & Dewi, A. B. C. (2021). Pemeriksaan Stroke Riskometer Pada Populasi Risiko Tinggi Dalam Rangka Hari Stroke Sedunia. *Jurnal Abdi Insani*, 8(2), 193-197.

105. Hung, C.-Y., Lin, C.-H., Lan, T.-H., Peng, G.-S., & Lee, C.-C. (2019). Development of an intelligent decision support system for ischemic stroke risk assessment in a population-based electronic health record database. *PLoS ONE*, *14*(3), e0213007.
106. Jauhar, M., Kusumawardani, L. H., Rasdiyanah, I., & Rohana, U. R. (2020). E-Ways (Early Warning System): A Literature Study of Smartphone Application-Based Stroke Early Detection. *Indian Journal of Public Health*, *11*(02), 1389.
107. Jeemon, P., & Mohanan, P. Digital Health Tools in Cardiology: How Useful?
108. Jessen, F. (2020). Attention in subjective cognitive decline—Authors' reply. *The Lancet Neurology*, *19*(7), 566-567.
109. Jiang, B. (2019). Suggestions for Domestic Primary Stroke Care Arising from Epidemiological Characteristics, Prevention and Treatment of Stroke in China. *Chinese General Practice*, *22*(30), 3653.
110. Johnson, C. O., Nguyen, M., Roth, G. A., Nichols, E., Alam, T., Abate, D., . . . Abu-Rmeileh, N. M. E. (2019). Global, regional, and national burden of stroke, 1990–2016: a systematic analysis for the Global Burden of Disease Study 2016. *The Lancet Neurology*, *18*(5), 439-458.
111. Johnson, W. D. PRIMARY STROKE PREVENTION WORLDWIDE: TRANSLATING EVIDENCE INTO ACTION.
112. Jusoh, S. (2017). A Survey on Trend, Opportunities and Challenges of mHealth Apps. *Int. J. Interact. Mob. Technol.*, *11*(6), 73-85.
113. Kalkonde, Y. V., Alladi, S., Kaul, S., & Hachinski, V. (2018). Stroke prevention strategies in the developing world. *Stroke*, *49*(12), 3092-3097.
114. Kang, Y.-N., Shen, H.-N., Lin, C.-Y., Elwyn, G., Huang, S.-C., Wu, T.-F., & Hou, W.-H. (2019). Does a Mobile app improve patients' knowledge of stroke risk factors and health-related quality of life in patients with stroke? A randomized controlled trial. *BMC Medical Informatics and Decision Making*, *19*(1), 1-9.
115. Kessler, D., & Liddy, C. (2017). An integrative literature review to examine the provision of self-management support following transient ischaemic attack. *Journal of Clinical Nursing*, *26*(21-22), 3256-3270.
116. Khriyenko, O., Rönkkö, K., Tsybulko, V., Piik, K., Le, D. P. M., & Riipinen, T. (2018). Stroke cognitive medical assistant (StrokeCMA). *GSTF Journal on Computing*, *6*(1).
117. Kijpaisalratana, N., Travanchakul, S., Vongvasinkul, P., Charnwut, S., Khamkhuneay, P., Nimnual, R., . . . Chutinet, A. (2018). Screening for Stroke Risk Factors Using Stroke Riskometer (TM) Application and Portable Atrial Fibrillation Detection Device: An Experience from King Chulalongkorn Memorial Hospital.
118. Kim, J., Thrift, A. G., Nelson, M. R., Bladin, C. F., & Cadilhac, D. A. (2015). Personalized medicine and stroke prevention: where are we? *Vascular health and risk management*, *11*, 601.
119. Kitjawijit, T. (2020). Stroke Riskometer for Predicting Internal Carotid Atherosclerotic Plaque by Carotid Duplex Ultrasonography in Asymptomatic Thai Adults Older Than 45 Years.
120. Kļaviņa, E., Strazdiņa, K., & Jursens, A. PREVALENCE OF PREVENTABLE STROKE RISK FACTORS IN THE LATVIAN POPULATION. *DAUGAVPILS UNIVERSITĀTES 61. STARPTAUTISKĀS ZINĀTNISKĀS KONFERENCES RAKSTU KRĀJUMS*, *18*.
121. Koehler, P. J. Early Works Identify Writer's Cramp Culprits.
122. Krishnamurthi, R. V., & Feigin, V. L. (2021). Global Burden of Stroke. *Stroke E-Book: Pathophysiology, Diagnosis, and Management*, 163.
123. Krishnamurthi, R., Bhattaacharjee, R., & Parmar, P. (2018). Effectiveness of the stroke riskometer app for primary stroke prevention: a pilot RCT.

124. Krishnamurthi, R., George, A., Merkin, A., Bhattacharjee, R., & Feigin, V. L. (2022). Can we stop the stroke tsunami? Mitigating the barriers, amplifying the facilitators. *Journal of the Royal Society of New Zealand*, 52(2), 109-128.
125. Krishnamurthi, R., Hale, L., Barker-Collo, S., Theadom, A., Bhattacharjee, R., George, A., . . . Feigin, V. (2019). Mobile technology for primary stroke prevention a proof-of-concept pilot randomized controlled trial. *Stroke*, 50(1), 196-198. doi:10.1161/STROKEAHA.118.023058
126. Kruchinina, M. V., Prudnikova, Y. I., Gromov, A. A., Generalov, V. M., Generalov, K. V., Kruchinin, V. N., . . . Minin, I. V. (2019). New opportunities for colorectal cancer diagnostics using an optical cell detection system based on dielectrophoresis. *Optics and Spectroscopy*, 126(5), 568-573. doi:10.1134/S0030400X19050163
127. Kumar, G., Mukherjee, S., & Patnaik, R. (2018). Exploring the Neuroprotective Potential of Chlorogenic Acid: An In-vivo and In-silico Approach. *Cerebrovasc Dis*, 46(1), 1-49.
128. Li, X., Pang, J., Li, M., & Zhao, D. (2019). Discover high-risk factor combinations using Bayesian network from cohort data of National Stroke Screening in China. *BMC Medical Informatics and Decision Making*, 19(2), 1-8.
129. Li, X., Yu, J., Li, J., Li, M., & Zhao, D. (2019). Simulating the risk of stroke in China using Markov model based on national screening data.
130. Lindsay, M. P., Norrving, B., Furie, K., Donnan, G., Langhorne, P., & Davis, S. (2012). Stroke rehabilitation. *Global stroke guidelines and action plan: A road map for quality stroke care*, 1-73.
131. Lindsay, M. P., Norrving, B., Sacco, R. L., Brainin, M., Hacke, W., Martins, S., . . . Feigin, V. (2019). *World Stroke Organization (WSO): global stroke fact sheet 2019*. In: SAGE Publications Sage UK: London, England.
132. Lobo, E. H., Frølich, A., Kensing, F., Rasmussen, L. J., Livingston, P. M., Grundy, J., & Abdelrazek, M. (2021). mHealth applications to support caregiver needs and engagement during stroke recovery: A content review. *Research in nursing & health*, 44(1), 213-225.
133. Lopes, J. C. G. (2017). Utilização da Via Verde do AVC numa perspetiva populacional: caracterização e prognóstico dos utilizadores com ativação extra-hospitalar e intra-hospitalar.
134. Lubetzki, C. (2021). Is remyelination a reasonable target in PMS? *Journal of the Neurological Sciences*, 429.
135. Luiz, J. M., Eidt, N., de Oliveira, N. P., Cardoso, L. R., & Ovando, A. C. (2021). Campanha de combate ao AVC: relato de um projeto de extensão da UFSC no município de Araranguá/SC. *Extensio: Revista Eletrônica de Extensão*, 18(39), 90-100.
136. Luvizutto, G. J., Luvizutto, M. G., de Meira, E. R., Vieira, G., de Albuquerque, J. G. S., Rodrigues, R. T., . . . Bazan, R. (2016). USE OF THE APPLICATION STROKE RISKOMETER TO ANALYZE RISK FACTORS ASSOCIATED WITH STROKE IN A BRAZILIAN POPULATION.
137. Maksimov, V. N., Ivanova, A. A., Orlov, P. S., Savchenko, S. V., & Voevoda, M. I. (2015). Evaluation of the genetic riskometer components KIF6, PALLD, SNX19, MYH15, VAMP8 for ischemic heart disease with sudden cardiac death. *Russian Journal of Cardiology*, 126(10), 12-18. doi:10.15829/1560-4071-2015-10-12-18
138. Malmefeldt, E., & Rao, G. H. R. (2019). Non-invasive diagnostic tools: cardiometabolic risk assessment and prediction. *CJournal of Clinical Cardiology and Diagnostics*, 2(1), 1-10.
139. Markus, H. S., Brainin, M., & Fisher, M. (2020). Tracking the global burden of stroke and dementia: World Stroke Day 2020. In (Vol. 15, pp. 817-818): SAGE Publications Sage UK: London, England.
140. Markus, H., Pereira, A., & Cloud, G. (2016). *Stroke medicine*: Oxford University Press.
141. Martins, S. C. O., Lavados, P., Secchi, T. L., Brainin, M., Ameriso, S., Gongora-Rivera, F., . . . Pérez-Romero, G. E. (2021). Fighting against stroke in Latin America: a joint effort of medical professional societies and governments. *Frontiers in neurology*, 1693.

142. Martins, S. C. O., Sacks, C., Hacke, W., Brainin, M., de Assis Figueiredo, F., Pontes-Neto, O. M., . . . McGhie, D. V. (2019). Priorities to reduce the burden of stroke in Latin American countries. *The Lancet Neurology*, 18(7), 674-683.
143. Mat Said, Z., Musa, K. I., Tengku Ismail, T. A., Abdul Hamid, A., Sahathevan, R., Abdul Aziz, Z., & Feigin, V. (2021). The effectiveness of stroke riskometer™ in improving stroke risk awareness in malaysia: A study protocol of a cluster-randomized controlled trial. *Neuroepidemiology*, 55(6), 436-446. doi:10.1159/000518853
144. Mauliddina, P. K., Damailia, R., & Tursina, A. (2021). Gambaran Probabilitas Stroke Berdasarkan Aplikasi Stroke Riskometer Framingham di Desa Sawah Kulon Kabupaten Purwakarta Periode September-Desember 2020. *Prosiding Pendidikan Dokter*, 7(1), 510-518.
145. Mechtouff, L., Haesebaert, J., Viprey, M., Tainturier, V., Termoz, A., Porthault-Chatard, S., . . . Schott, A.-M. (2018). Secondary prevention three and six years after stroke using the french national insurance healthcare system database. *European Neurology*, 79(5-6), 272-280.
146. Medvedev, O., Truong, Q. C., Merkin, A., Borotkanics, R., Krishnamurthi, R., & Feigin, V. (2021). Cross-cultural validation of the stroke riskometer using generalizability theory. *Scientific Reports*, 11(1), 1-10. doi:10.1038/s41598-021-98591-8
147. Mensah, G. A. (2017). Taking Action for Cardiovascular Health Around the Globe. *Global Heart*, 12(3).
148. Merkin, A., Krishnamurthi, R., & Medvedev, O. N. (2022). Machine learning, artificial intelligence and the prediction of dementia. *Current Opinion in Psychiatry*, 35(2), 123-129.
149. Merkin, A., Medvedev, O., Akinfieva, S., Krishnamurthi, R., Gutsaluk, A., Kuliev, R., . . . Reips, U. D. (2022). Application of the stroke riskometer mobile app-based stroke risk as a predictive tool for clinical outcomes of SARS-COV-2 (COVID-19). *Neuroepidemiology*, 50-50.
150. Merkin A, Akinfieva S, Medvedev ON, Krishnamurthi RV, Gutsaluk A, Reips UD, Kuliev R, Dinov E, Nikiforov I, Shamalov N et al. A pilot study of application of the Stroke Riskometer mobile app for assessment of the course and clinical outcomes of COVID-19 among hospitalised patients. *Cerebrovascular Diseases Extra*. 2023
151. Michael, B., Bo, N., Co, M. S., & Vladimir, H. (2020). Декларация по глобальной первичной профилактике инсульта и деменции Всемирной организации по борьбе с инсультом. *Анналы клинической и экспериментальной неврологии*, 14(3), 5-10.
152. Miranda, J. J., Zhao, D., & Wu, Y. Lijing L. Yan, Chaoyun Li, Jie Chen, Rong Luo, Janet Bettger, Yishan Zhu, Valery Feigin, Martin O'Donnell.
153. Monzani, D., & Pizzoli, S. F. M. (2020). The Prevention of Chronic Diseases Through eHealth: A Practical Overview. P5 eHealth: An Agenda for the Health Technologies of the Future, 33-51.
154. Morgan, J. (2016). The power of the App: can mobile-technology save lives? *The Lancet Neurology*, 15(7), 668.
155. Mustapha, A. F., Fawale, O. M. A., & Adebajo, O. M. (2017). Contributing to a better understanding and management of stroke in Nigeria: The burden, the challenges, resources and opportunities. *Journal of Clinical and Applied Neurosciences Volume*, 2(1).
156. Mutukwa, L. (2019). Communications by the ministry of health to help reduce the prevalence of stroke and improve its management: a case of Lusaka, Zambia.
157. Naji, M. T., Al, H. M., & Al, A. I. Research Article Differential effects of statins on matrix metalloproteinase-9 (MMP-9) in patients with acute ischaemic stroke: A potential for salutary.
158. Naji, M. T., Al-Kuraishy, H. M., & Al-Gareeb, A. I. (2021). Differential effects of statins on matrix metalloproteinase-9 (MMP-9) in patients with acute ischaemic stroke: A potential for salutary. *JPMA. The Journal of the Pakistan Medical Association*, 71(12), S82-S87.

159. Neelam, N. S., Senthil, P., Swathi, S. S., Subramanian, S., Nainar, A. M., Haribabu, L., & Vijayabharathi, E. (2022). Classification of stroke riskometer app™ into low, moderate and high stroke risk range. [Klasyfikacja ryzyka udaru mózgu na niskie, średnie i wysokie przy użyciu aplikacji Stroke Riskometer App™ wśród populacji osób dorosłych i starszych] *Fizjoterapia Polska*, 22(4), 22-26. doi:10.56984/8ZG1A624g
160. Nekrasova, K. A., Ischenko, A. M., & Trofimov, A. V. (2021). Inhibition of the complement anaphylatoxin activities in the central nervous system disorders. *Medical academic journal*, 21(2), 37-52.
161. Norrving, B. (2020). Stroke and TIA. *Oxford Textbook of Neurologic and Neuropsychiatric Epidemiology*, 193.
162. Norrving, B., Davis, S. M., Feigin, V. L., Mensah, G. A., Sacco, R. L., & Varghese, C. (2015). Stroke prevention worldwide-what could make it work. *Neuroepidemiology*, 45(3), 215-220.
163. Nouné Tankou, C. (2022). Association between gender, socioeconomic status, blood pressure, Body Mass Index, and stroke in Germany: An analysis based on the Robert Koch-Institute survey data (DEGS).
164. O'Connor, S. R., Kee, F., Thompson, D. R., Cupples, M. E., Donnelly, M., & Heron, N. (2021). A review of the quality and content of mobile apps to support lifestyle modifications following a transient ischaemic attack or 'minor' stroke. *Digital Health*, 7, 20552076211065271.
165. Ogundimu, S. O. (2021). Perceived Value of Mobile Health Technology Among Older Adults: A Generic Qualitative Inquiry.
166. Olds, M., Ellis, R., & Kersten, P. (2020). Predicting Recurrent Instability of the Shoulder (PRIS): a valid tool to predict which patients will not have repeat shoulder instability after first-time traumatic anterior dislocation. *Journal of Orthopaedic & Sports Physical Therapy*, 50(8), 431-437.
167. Oliveira, W. C. G. d. (2018). Sistema multiagente fuzzy para monitoramento e avaliação.
168. Ortega-Martín, M. E., Lucena-Antón, D., Luque-Moreno, C., Heredia-Rizo, A. M., & Moral-Munoz, J. A. (2020). Aplicaciones móviles en el abordaje terapéutico del ictus: Revisión en repositorios comerciales y búsqueda de evidencia. *Revista Española de Salud Pública*, 93, e201906035.
169. Ortiz Fernández, L. (2022). Usabilidad y eficacia del sistema EHealth de autocuidado Starr para supervivientes de un ictus.
170. Othman, A., Harith, S., Ibrahim, M. I., & Van Rostenberghe, H. A Preliminary Study on the Reliability of the Malay Version of PedsQL™ Family Impact Module among Caregivers of Children.
171. Othman, M., Halil, N. M., Yusof, M. M., Mohamed, R., & Abdullah, M. H. A. (2018). Empowering self-management through M-Health applications.
172. Othman, M., Yusof, M. M., Mohamed, R., & Halil, N. M. Android Based Application for Monitoring Patients Health and Medicine Intake.
173. Ouriques Martins, S. C., Lavados, P., Secchi, T. L., Brainin, M., Ameriso, S., Gongora-Rivera, F., . . . Pérez-Romero, G. E. (2021). Fighting Against Stroke in Latin America: A Joint Effort of Medical Professional Societies and Governments.
174. Owolabi, M. O., Thrift, A. G., Mahal, A., Ishida, M., Martins, S., Johnson, W. D., . . . Phan, H. T. (2021). Primary stroke prevention worldwide: translating evidence into action. *The Lancet Public Health*.
175. Owolabi, M. O., Thrift, A. G., Martins, S., Johnson, W., Pandian, J., Abd-Allah, F., . . . Phan, H. T. (2021). The state of stroke services across the globe: Report of World Stroke Organization–World Health Organization surveys. *International Journal of Stroke*, 16(8), 889-901.
176. Pandian, J. (2021). Generating and implementing new concepts on a population level. *Journal of the Neurological Sciences*, 429, 117927.

177. Pandian, J. D., William, A. G., Kate, M. P., Norrving, B., Mensah, G. A., Davis, S., . . . Kissela, B. M. (2017). Strategies to improve stroke care services in low-and middle-income countries: a systematic review. *Neuroepidemiology*, 49(1-2), 45-61.
178. Parmar, P., Krishnamurthi, R., Ikram, M. A., Hofman, A., Mirza, S. S., Varakin, Y., . . . Feigin, V. L. (2015). The stroke Riskometer™ app: Validation of a data collection tool and stroke risk predictor. *International Journal of Stroke*, 10(2), 231-244. doi:10.1111/ijls.12411
179. Patomella, A.-H., Guidetti, S., Mälstam, E., Eriksson, C., Bergström, A., Åkesson, E., . . . Asaba, E. (2019). Primary prevention of stroke: randomised controlled pilot trial protocol on engaging everyday activities promoting health. *BMJ Open*, 9(11), e031984.
180. Phylactou, P., & Charalambous, M. (2021). The Stroke Riskometer™ App: The Greek Version. Live Poster Presentation.
181. Piran, P., Thomas, J., Kunnakkat, S., Pandey, A., Gilles, N., Weingast, S., . . . Levine, S. R. (2019). Medical mobile applications for stroke survivors and caregivers. *Journal of Stroke and Cerebrovascular Diseases*, 28(11), 104318.
182. Portegies, M. L. P., Koudstaal, P. J., & Ikram, M. A. (2016). Cerebrovascular disease. *Handbook of clinical neurology*, 138, 239-261.
183. Pulbere, V., & Iftene, A. (2021). Using FAST Test to Detect Stroke.
184. Quinn, C. BOOK REVIEW: Palliative Care in Amyotrophic Lateral Sclerosis: From Diagnosis to Bereavement.
185. Ramli, N. N. N., Malik, M. A. A., Fazly, S. H. A., Arasu, R., & Rusli, N. A. (2022). Preventing the first stroke attack via mobile application technology. *Ethics, Medicine and Public Health*, 23, 100780.
186. Reis, J., Román, G. C., Giroud, M., Palmer, V. S., & Spencer, P. S. (2019). Medical management, prevention and mitigation of environmental risks factors in Neurology. *Revue Neurologique*, 175(10), 698-704.
187. Repts, J. M., Williams, R. D., You, S. C., Falconer, T., Minty, E., Callahan, A., . . . Rijnbeek, P. (2020). Feasibility and evaluation of a large-scale external validation approach for patient-level prediction in an international data network: validation of models predicting stroke in female patients newly diagnosed with atrial fibrillation. *BMC medical research methodology*, 20(1), 1-10.
188. Ridwan, A., Andi, Z., Saifuddin, S., & Bintara, B. A. (2020). Primary prevention of stroke through development of mobile health application. *Enfermería Clínica*, 30, 133-139.
189. Roberts, M. (2022). Invited Clinical Commentary On: Wellness Aging Model Related to Inactivity, Illness, and Injury (WAMI-3): A Tool to Encourage Prevention in Practice. *Journal of Geriatric Physical Therapy*, 45(4), 178-179.
190. Roberts, W. C. (2015). Facts and ideas from anywhere.
191. Rosano, C., Ikram, M. A., & Ganguli, M. (2016). Cerebrovascular disease. *Neuroepidemiology*, 239.
192. Ruksakulpiwat, S. (2021). Stroke risk screening scales (SRSS): identification of domain and item generation. *Journal of Stroke and Cerebrovascular Diseases*, 30(6), 105740.
193. Rumsfeld, J. S., Brooks, S. C., Aufderheide, T. P., Leary, M., Bradley, S. M., Nkonde-Price, C., . . . Merchant, R. M. (2016). Use of mobile devices, social media, and crowdsourcing as digital strategies to improve emergency cardiovascular care: a scientific statement from the American Heart Association. *Circulation*, 134(8), e87-e108.
194. Ryan, P. B., Park, R. W., Lim, H.-S., & Rijnbeek, P. (2020). Jenna M. Repts<sup>1</sup>, Ross D. Williams<sup>2</sup>, Seng Chan You<sup>3</sup>, Thomas Falconer<sup>4</sup>, Evan Minty<sup>5</sup>, Alison Callahan<sup>6</sup>.
195. Said, M. Z. M., Musa, K. I., Ismail, T. A. T., Hamid, A. A., Sahathevan, R., Aziz, Z. A., & Feigin, V. (2021). A cluster-randomised controlled trial evaluating the effectiveness of stroke riskometer in improving stroke risk awareness in adults: a preliminary study.
196. Said, Z. M., Musa, K. I., Ismail, T. A. T., Hamid, A. A., Sahathevan, R., Aziz, Z. A., & Feigin, V. (2021). The Effectiveness of Stroke Riskometer™ in Improving Stroke Risk Awareness in

- Malaysia: A Study Protocol of a Cluster-Randomized Controlled Trial. *Neuroepidemiology*, 55(6), 436-446.
197. Salo, S. (2017). Aivoinfarktin ennaltaehkäistävät riskitekijät.
198. Sanchez Fernandez, J. J., Ortiz, M. R., Ballesteros, F. M., Luque, C. O., Penas, E. R., Ortega, M. D., & Rubio, D. M. (2020). CHA<sub>2</sub>DS<sub>2</sub>-VASC score as predictor of stroke and all-cause death in stable ischaemic heart disease patients without atrial fibrillation. *Journal of Neurology*, 267(10), 3061-3068.
199. Sarfo, F. S., Akpa, O., Ovbiagele, B., Akpalu, A., Wahab, K., Komolafe, M., . . . Jenkins, C. (2021). Influence of age on links between major modifiable risk factors and stroke occurrence in West Africa. *Journal of the Neurological Sciences*, 428, 117573.
200. Sasso, G. T. M. D. A. L., Hammes, F. F., & Postal, L. (2021). Cerebrovascular Diseases Dashboard and Update of the Predictive Analysis: A Proposal for e-SUS Brazil in the Primary Care.
201. Sethi, P. R., Mehta, D. A., & Kumar, D. V. (2018). Epidemiological Study Evaluating Uncontrolled Systolic Blood Pressure in Patients  $\geq$  50 Years With Hypertension, in Relation to Stroke Risk and Current Antihypertensive Treatment Strategies (systup)-Analysis of India Cohort. *Hypertension*, 72(Suppl\_1), A029-A029.
202. Sethi, R., Hiremath, J. S., Ganesh, V., Banerjee, S., Shah, M., Mehta, A., . . . Shah, N. (2021). Correlation between stroke risk and systolic blood pressure in patients over 50 years with uncontrolled hypertension: Results from the SYSTUP-india study. *Cardiovascular Therapeutics*, 2021 doi:10.1155/2021/6622651
203. Setiawati, E. (2022). Stroke Prone Profile dan Tingkat Risiko Stroke Lansia Panti Jompo Provinsi Sumatera Barat Tahun 2021. *Scientific Journal*, 1(3), 220-228.
204. Shakir, R. (2015). AFAN Brings New Era in African Neurology.
205. Shao, Z., Chen, C., Li, W., Ren, H., & Chen, W. (2019). Assessment of the risk factors in the daily life of stroke patients based on an optimized decision tree. *Technology and Health Care*, 27(S1), 317-329.
206. Silva, G. S., & Schwamm, L. H. (2021). Advances in stroke: digital health. *Stroke*, 52(1), 351-355.
207. Singer, J., & Levine, S. R. (2016). Stroke and technology: prescribing mHealth apps for healthcare providers, patients and caregivers—a brief, selected review. *Future Neurology*, 11(2), 109-112.
208. Song, S. (2015). The Global Stroke Burden. *World Neurology*, 30(5).
209. Song, T.-j., Jeong, Y., Park, J., & Gwak, H. S. (2020). Risk Factors and Prevention of Stroke. *Cerebrovasc Dis*, 49(1), 1-149.
210. Sparling, T. L., Yih, E. T., Goldstein, R., Slocum, C. S., Ryan, C. M., Zafonte, R., & Schneider, J. C. (2022). Development of a 30-Day Readmission Risk Calculator for the Inpatient Rehabilitation Setting. *Journal of the American Medical Directors Association*.
211. Strambo, D., Zachariadis, A., Lambrou, D., Schwarz, G., Sirimarco, G., Aarnio, K., . . . Michel, P. (2021). A score to predict one-year risk of recurrence after acute ischemic stroke. *International Journal of Stroke*, 16(5), 602-612.
212. Swanepoel, A. C., & Pretorius, E. (2015). Prevention and follow-up in thromboembolic ischemic stroke: Do we need to think out of the box? *Thrombosis research*, 136(6), 1067-1073.
213. Swanson, H. J. (2019). BEFASTA Education to Change Attitudes to Call 911 When Stroke Symptoms Occur.
214. Tench, R. (2021). Review of the book *China and the Modern World: Imperial China and the West Part II*, 1865-1905.
215. TerapÉutico, A. M. E. N. E. L. A., Ictus, D. E. L., BÚSqueda, R. E. N. R. C. Y., & Evidencia, D. E. (2019). ORIGINAL BREVE. *Rev Esp Salud Pública*, 93(12), e16.



216. Thrift, A. G., Kendall, E., Broadley, S. A., & Feigin, V. L. (2015). 5th International Conference on Neurology and Epidemiology. *Neuroepidemiology*, 45, 298-337.
217. Towfighi, A., & Laura Stevens, M. (2020). What You Must Know about Strokes: How to Recover from a Stroke and Prevent Another Stroke: Square One Publishers, Inc.
218. Trial, A. C. R. C. (2022). DR MOHAMAD ZARUDIN MAT SAID.
219. Trinh, T. (2017). Clinical measures of the neurophysiological mechanisms of rehabilitation-induced improvements in chronic stroke.
220. van Gelder, P. (2017). On The Risk-Informed Regulation for the Safety Against External Hazards. *Handbook of Safety Principles*, 415-433.
221. Vanacker, P., Standaert, D., Libbrecht, N., Vansteenkiste, I., Bernard, D., Yperzeele, L., & Vanhooren, G. (2017). An individualized coaching program for patients with acute ischemic stroke: Feasibility study. *Clinical Neurology and Neurosurgery*, 154, 89-93.
222. Verma, A., Towfighi, A., Brown, A., Abhat, A., & Casillas, A. (2022). Moving towards equity with digital health innovations for stroke care. *Stroke*, 29(2), 689-697.
223. Voloshynskiy, O., Vysotska, V., & Bublyk, M. (2021). Cardiovascular Disease Prediction Based on Machine Learning Technology.
224. Wahab, K. (2018). A6091 Influence of Blood Pressure Control on the 10-year Risk of Stroke in Stroke-Free Nigerians with Arterial Hypertension. *Journal of Hypertension*, 36, e303.
225. Walker Jr, R. W. (2021). Black Health Matters: The Vital Facts You Must Know to Protect Your Health and That of Your Loved Ones: Square One Publishers, Inc.
226. Wang, W.-T., Wu, T.-C., Tseng, W.-K., Wu, Y.-W., Lin, T.-H., Yeh, H.-I., . . . Yin, W.-H. (2021). Prognostic indicators for the onset of ischaemic versus haemorrhagic stroke in stable coronary artery disease. *Medicine*, 100(48), e27973-e27973.
227. Wise, K., & Ma, E. (2016). Clinical presentation of tinnitus and a review of, and evidence base for, tinnitus applications. *Perspectives of the ASHA Special Interest Groups*, 1(7), 43-56.
228. Workpackage, W. P. (2016). D2. 2. Predictive modelling in Stroke.
229. Wu, Y. (2017). Lijing L. Yan, Chaoyun Li, Jie Chen, Rong Luo, Janet Bettger, Yishan Zhu, Valery Feigin, Martin O'Donnell, J. Jaime Miranda, Dong Zhao, and. Disease Control Priorities, (Volume 5): Cardiovascular, Respiratory, and Related Disorders.
230. Xu, W., Huang, J., Yu, Q., Yu, H., Pu, Y., & Shi, Q. (2021). A systematic review of the status and methodological considerations for estimating risk of first ever stroke in the general population. *Neurological Sciences*, 42(6), 2235-2247.
231. Yan, L. L., Li, C., Chen, J., Miranda, J. J., Luo, R., Bettger, J., . . . Zhao, D. (2016). Prevention, management, and rehabilitation of stroke in low-and middle-income countries. *Neurologicalsci*, 2, 21-30.
232. Yayla, E. N., & Çizmeci, B. (2022). TC Sağlık Bakanlığı'nın Mobil Sağlık Uygulamalarının Bilinirliğine Yönelik Bir Araştırma. *Süleyman Demirel Üniversitesi Vizyoner Dergisi*, 13(33), 254-270.
233. Zafar, A., Albakr, A. I., Shahid, R., Nazish, S., Aljaafari, D., Alkhamis, F. A., . . . Khatri, I. A. (2020). Stroke literacy in the population of the Eastern Province of Saudi Arabia; immediate steps are essential to bridge the gap. *Journal of Stroke and Cerebrovascular Diseases*, 29(10), 105088.
234. Zee, B., Lee, J., Li, Q., Mok, V., Kong, A., Chiang, L.-K., . . . Yang, Z. (2016). Stroke risk assessment for the community by automatic retinal image analysis using fundus photograph. *Qual Primary Care*, 24(3), 114-124.
235. Zhang, M. W. B., & Ho, R. C. M. (2017). Smartphone Applications providing information about Stroke: Are we missing Stroke Risk computation preventive applications? *Journal of Stroke*, 19(1), 115-116.

236. Zhang, Y., Fang, X., Guan, S., Wu, X., Liu, H., Wang, C., . . . Cheng, J. (2020). Validation of 10-year stroke prediction scores in a community-based cohort of chinese older adults. *Frontiers in neurology*, 11, 986.
237. Zhou, X., Du, M., & Zhou, L. (2018). Use of mobile applications in post-stroke rehabilitation: a systematic review. *Topics in stroke rehabilitation*, 25(7), 489-499.
238. Гнедовская, Е., Кравченко, М., Прокопович, М., Андреева, О., Сергеев, Д., Ощепкова, Е., . . . Пирадов, М. (2016). Распространенность факторов риска цереброваскулярных заболеваний у жителей мегаполиса в возрасте 40-59 лет (клиникоэпидемиологическое исследование). *Анналы клинической и экспериментальной неврологии*, 10(4), 11-19.
239. Кришнамурти, Р., Бхаттачарджи, Р., Пармар, П., Хуссейн, Т., & Барке-Колло, С. Новый подход к профилактике инсульта в России.
240. Рахмонов, Р. А., Тоджиддинов, Т. Б., Исоева, М. Б., & Зуурбекова, Д. П. (2017). Суммарный сердечно-сосудистый риск-новый подход к прогнозированию инсульта. *Вестник Авиценны*, 19(4), 471-475.
241. Рахмонов, Р. РАСПРОСТРАНЕННОСТЬ ФАКТОРОВ РИСКА ИНСУЛЬТА В ПОПУЛЯЦИИ ТРУДОСПОСОБНОГО ВОЗРАСТА Г. ДУШАНБЕ.
242. Фейгин, В., Варакин, Ю., Кравченко, М., Пирадов, М., Танашян, М., Гнедовская, Е., . . . Бхаттачарджи, Р. (2015). Новый подход к профилактике инсульта в России. *Анналы клинической и экспериментальной неврологии*, 9(4), 19-23.
243. 江滨. (2019). 现阶段我国脑卒中流行特征及防治现状对全科医疗服务的启示和建议. *中国全科医学*, 22(30), 3653.
244. 王佳, 张蓓, & 严琴琴. (2022). 全科医生在脑卒中社区防治的现状 & 策略研究. *Advances in Clinical Medicine*, 12, 9514.
245. 邓娟, & 谢红珍. (2018). 移动互联网与机器人技术在脑卒中患者管理中的应用现状. *护理学报*, 25(14), 29-32.

## SUPPLEMENTARY FIGURES

**Supplementary Figure 1: Methodological workflow for deriving pragmatic solutions to reduce the global burden of stroke**

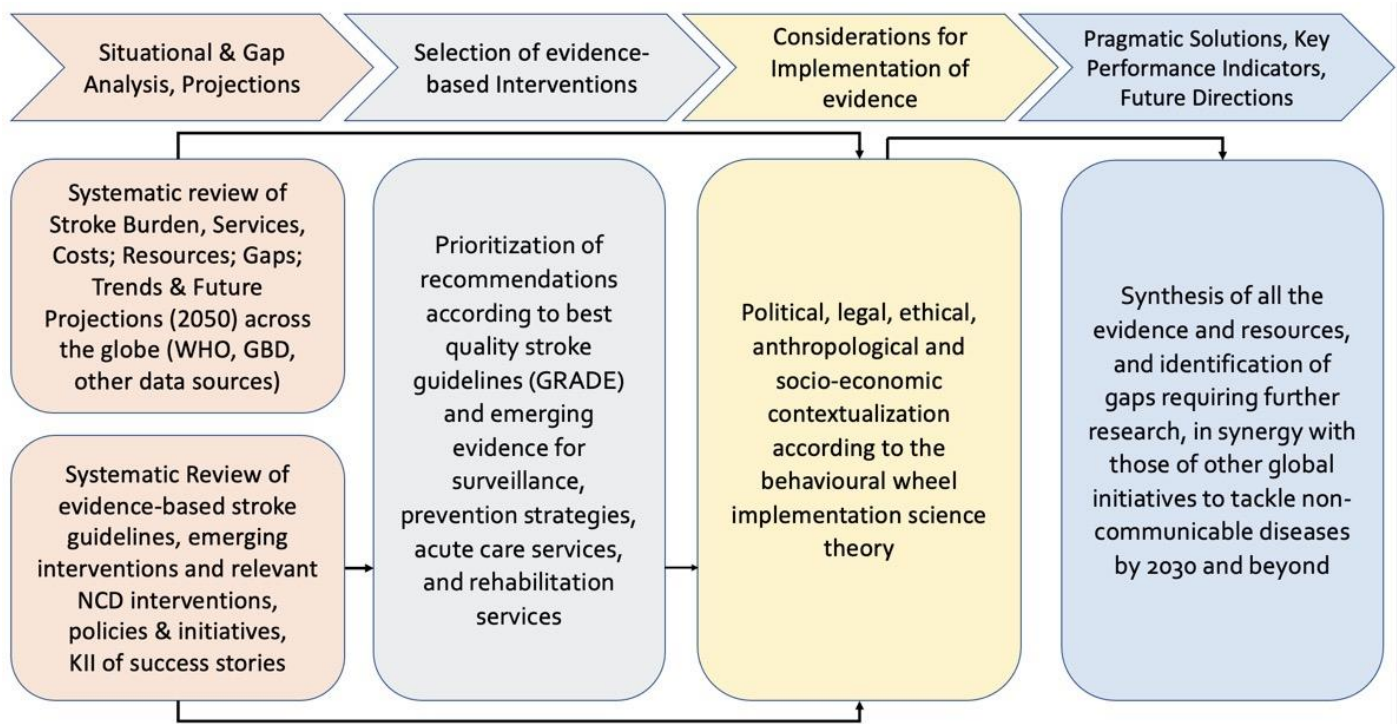

Supplementary Figure 2. Matrix for multiple case study mixed methods analysis of stroke services

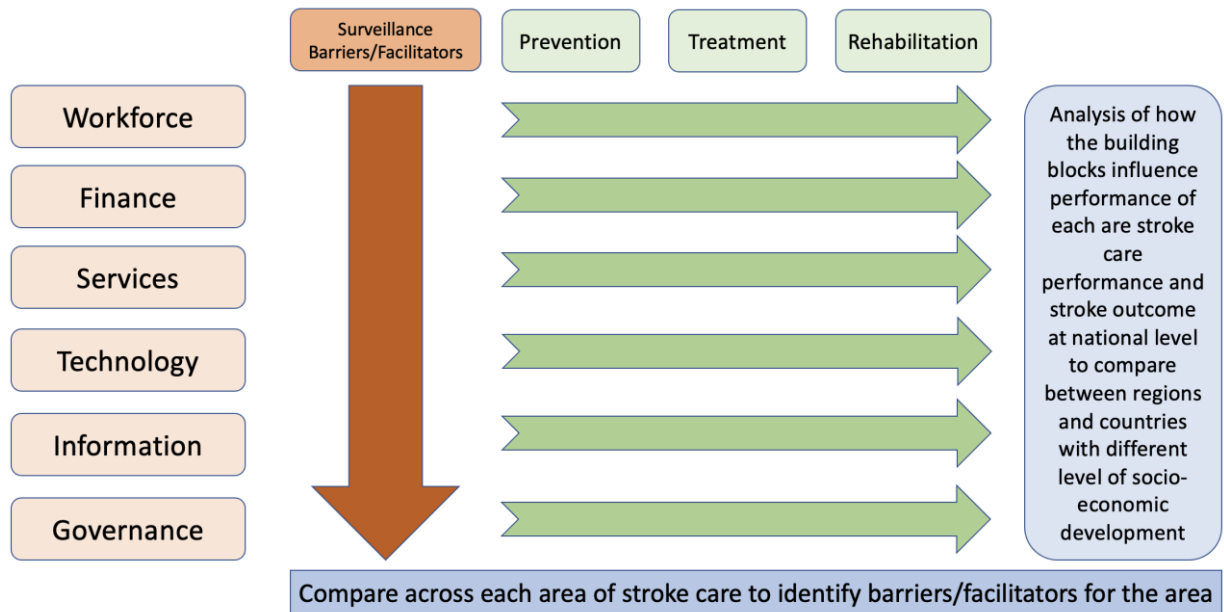

Supplementary Figure 3: Forecasts of stroke deaths (with 95% UI) globally by age group (<60 years, 60+ years), pathological types of stroke (ischaemic stroke, intracerebral haemorrhage, subarachnoid haemorrhage, total strokes), GBD regions and World Bank country income level, 2020-2050

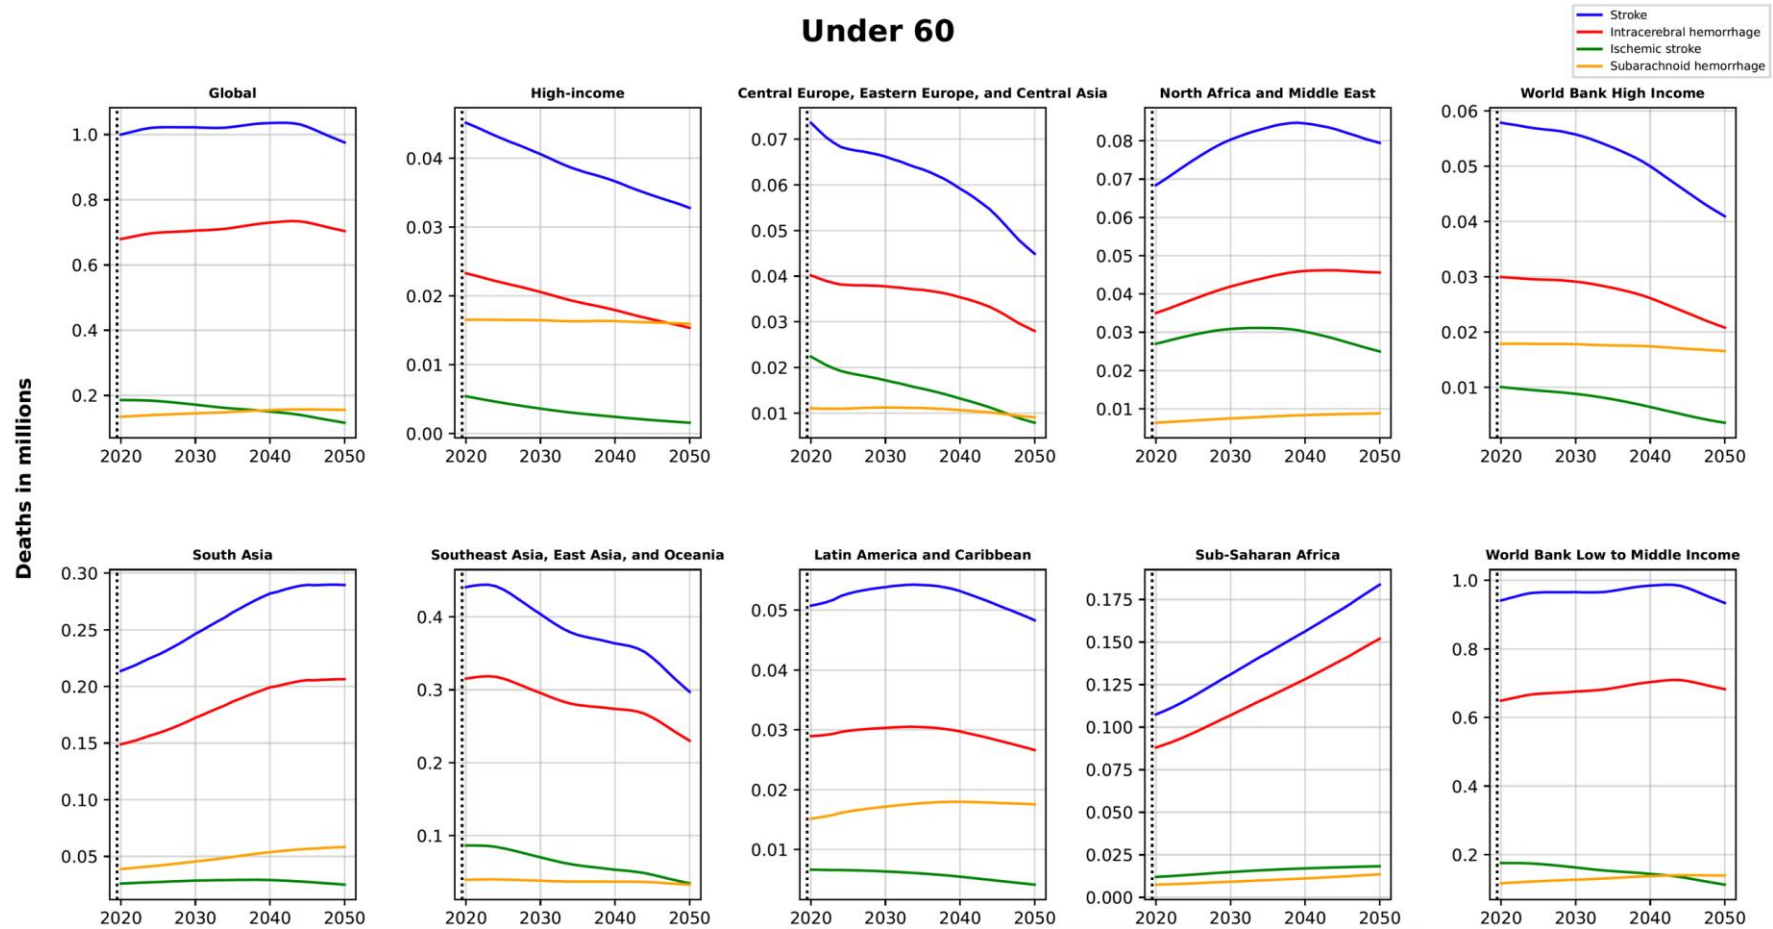

## Over 60

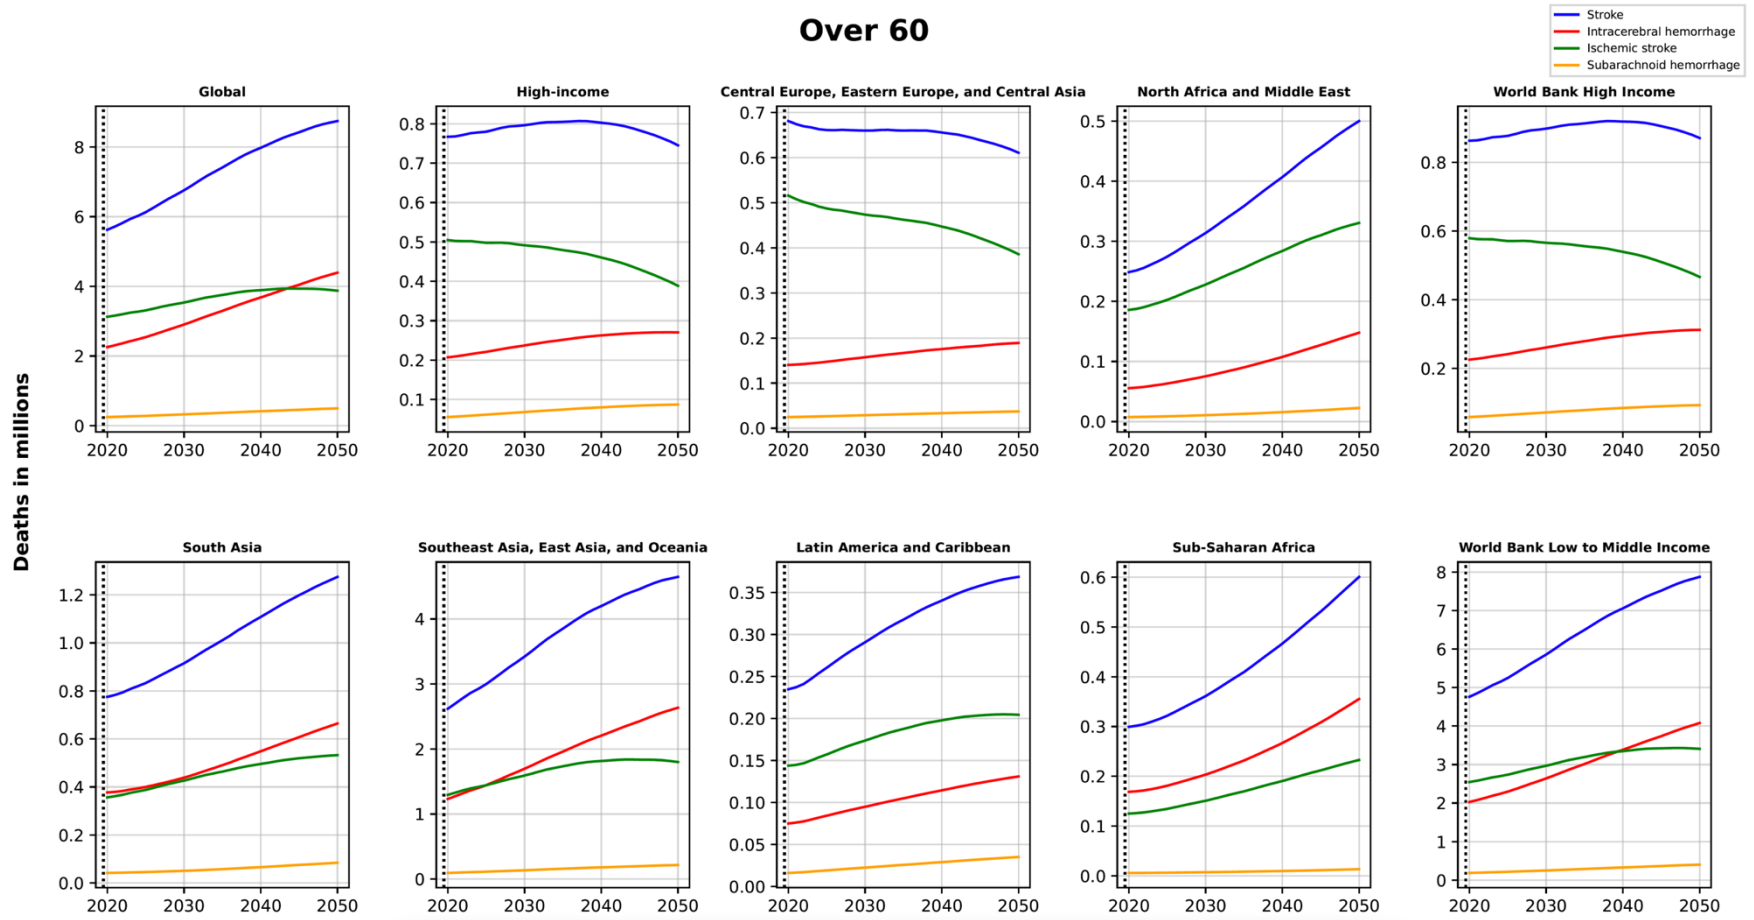

Supplementary Figure 4: Forecasts of age-standardized stroke deaths rates per 100,000 person-years (with 95% UI) globally by age group (<60 years, 60+ years), pathological types of stroke (ischaemic stroke, intracerebral haemorrhage, subarachnoid haemorrhage, total strokes), GBD regions and World Bank country income level, 2020-2050

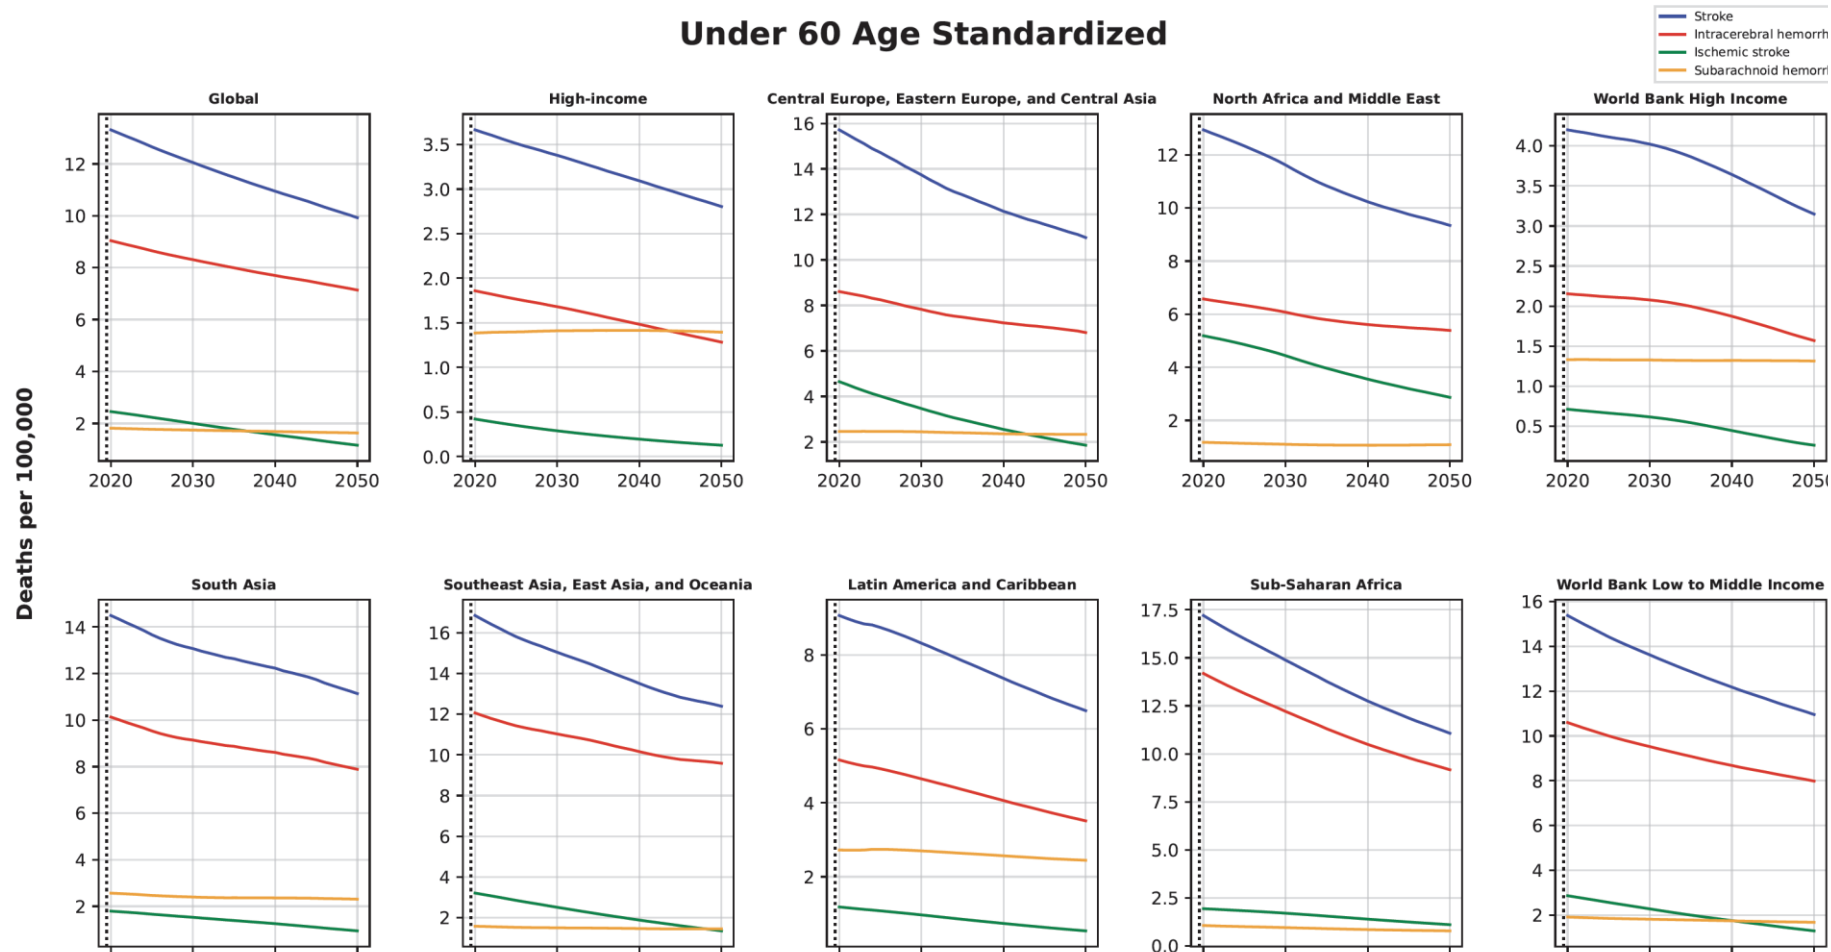

## Over 60 Age Standardized

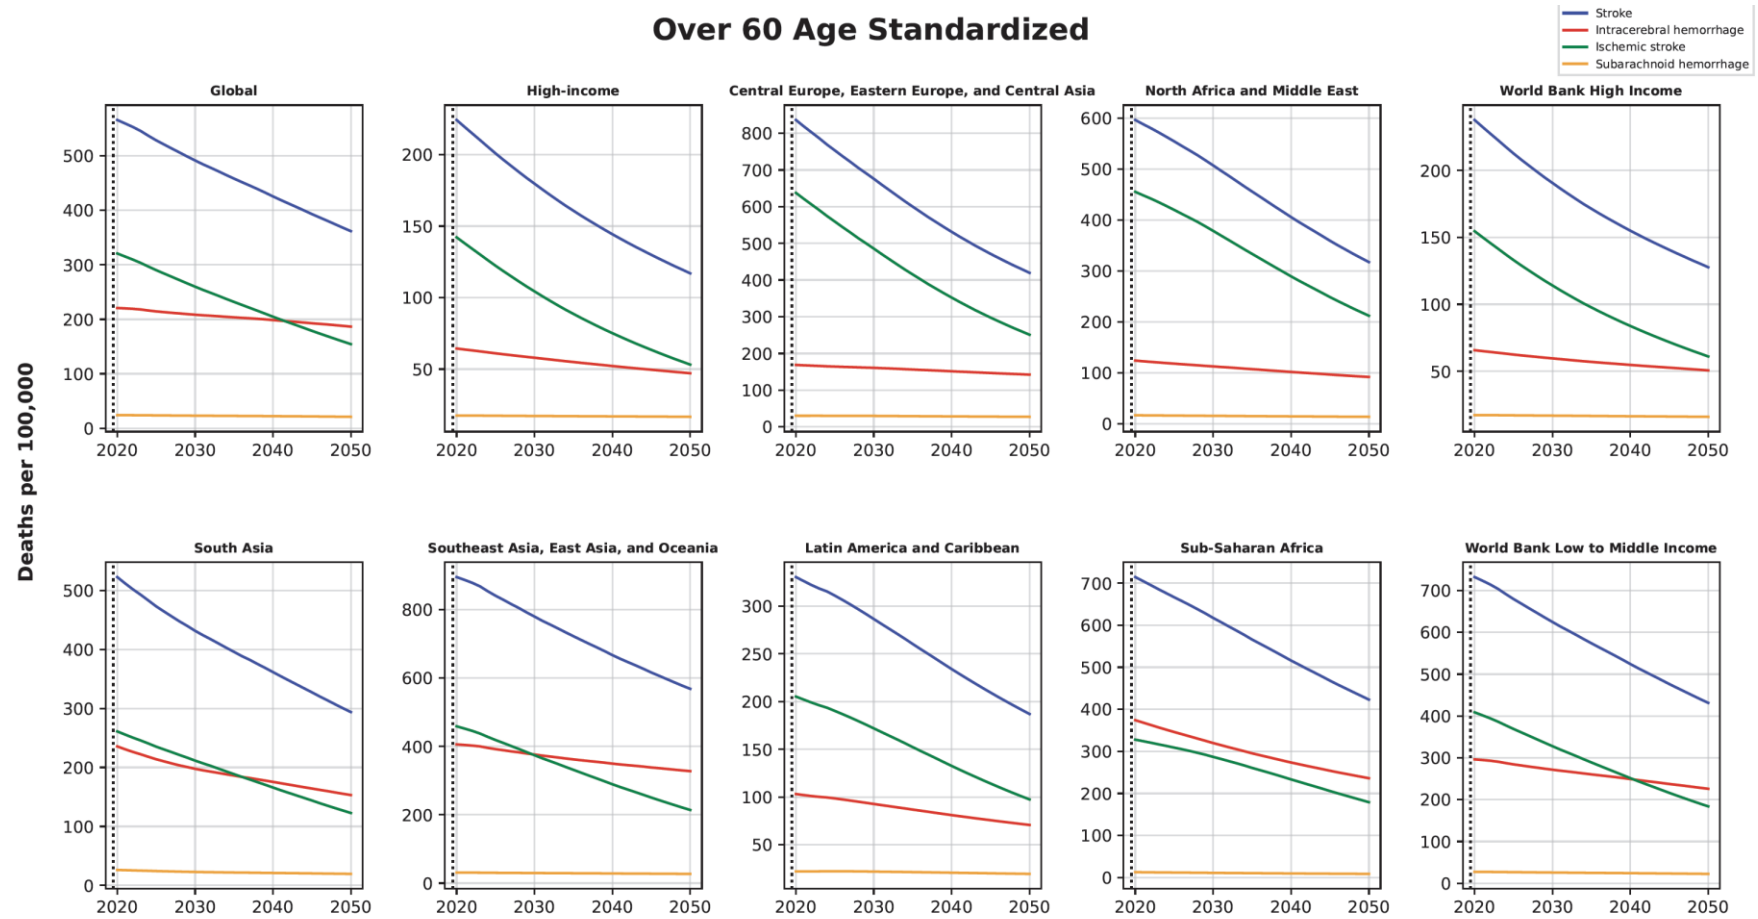



Supplementary Figure 5: Forecasts of DALYs counts globally by age group (<60 years, 60+ years), pathological types of stroke (ischaemic stroke, intracerebral haemorrhage, subarachnoid haemorrhage, total strokes), GBD regions and World Bank country income level, 2020-2050

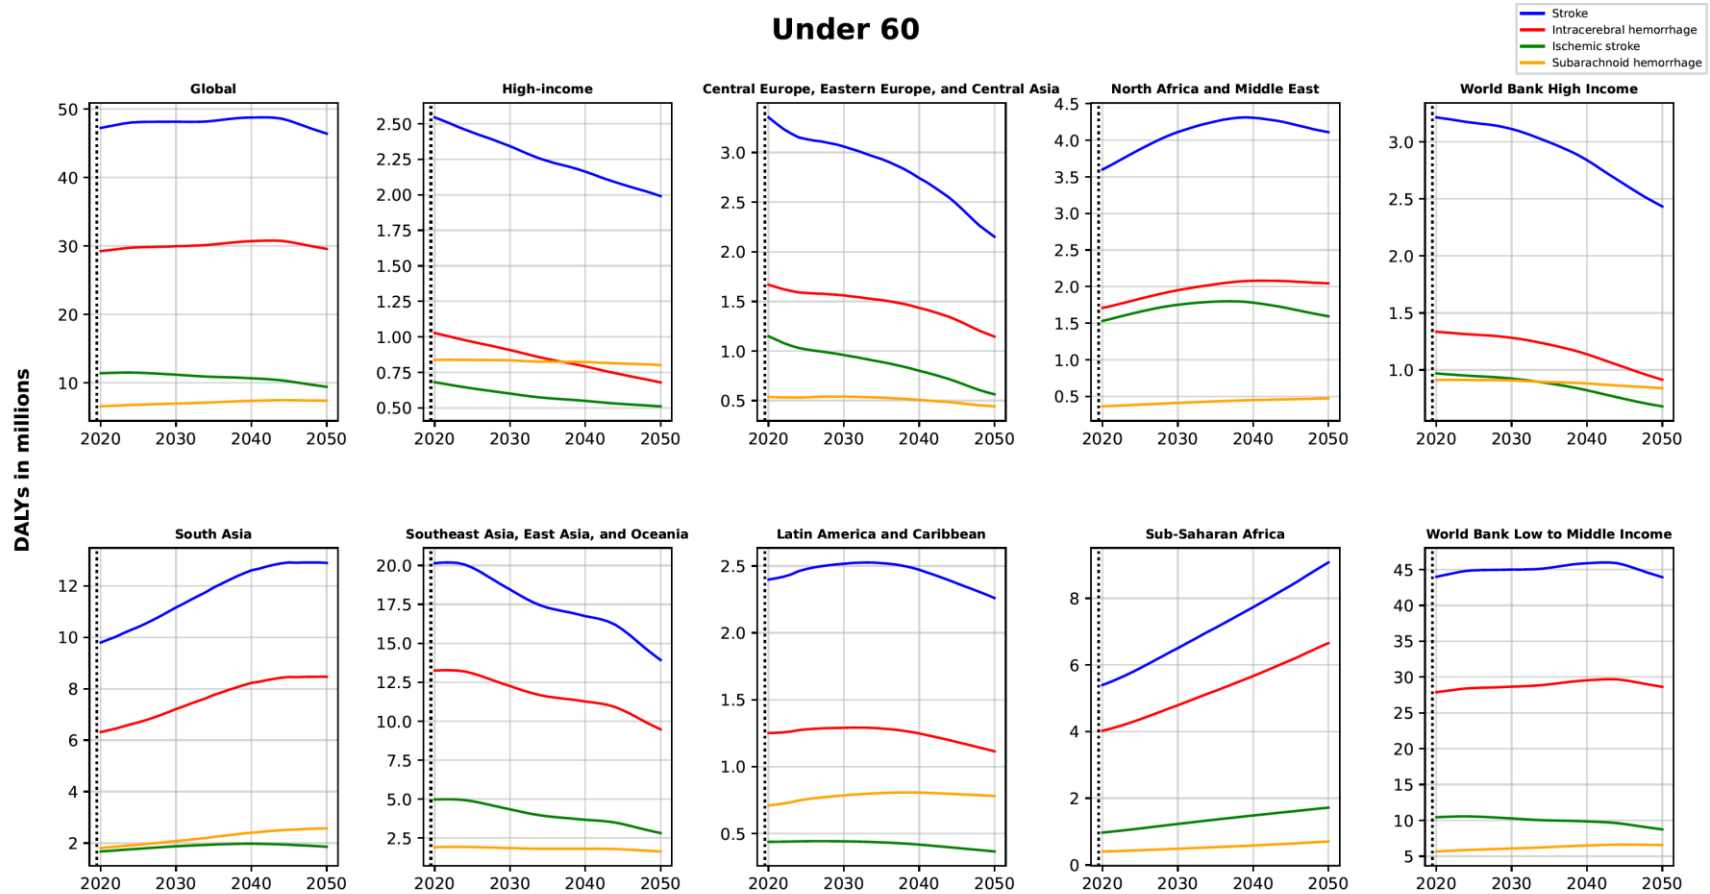

## Over 60

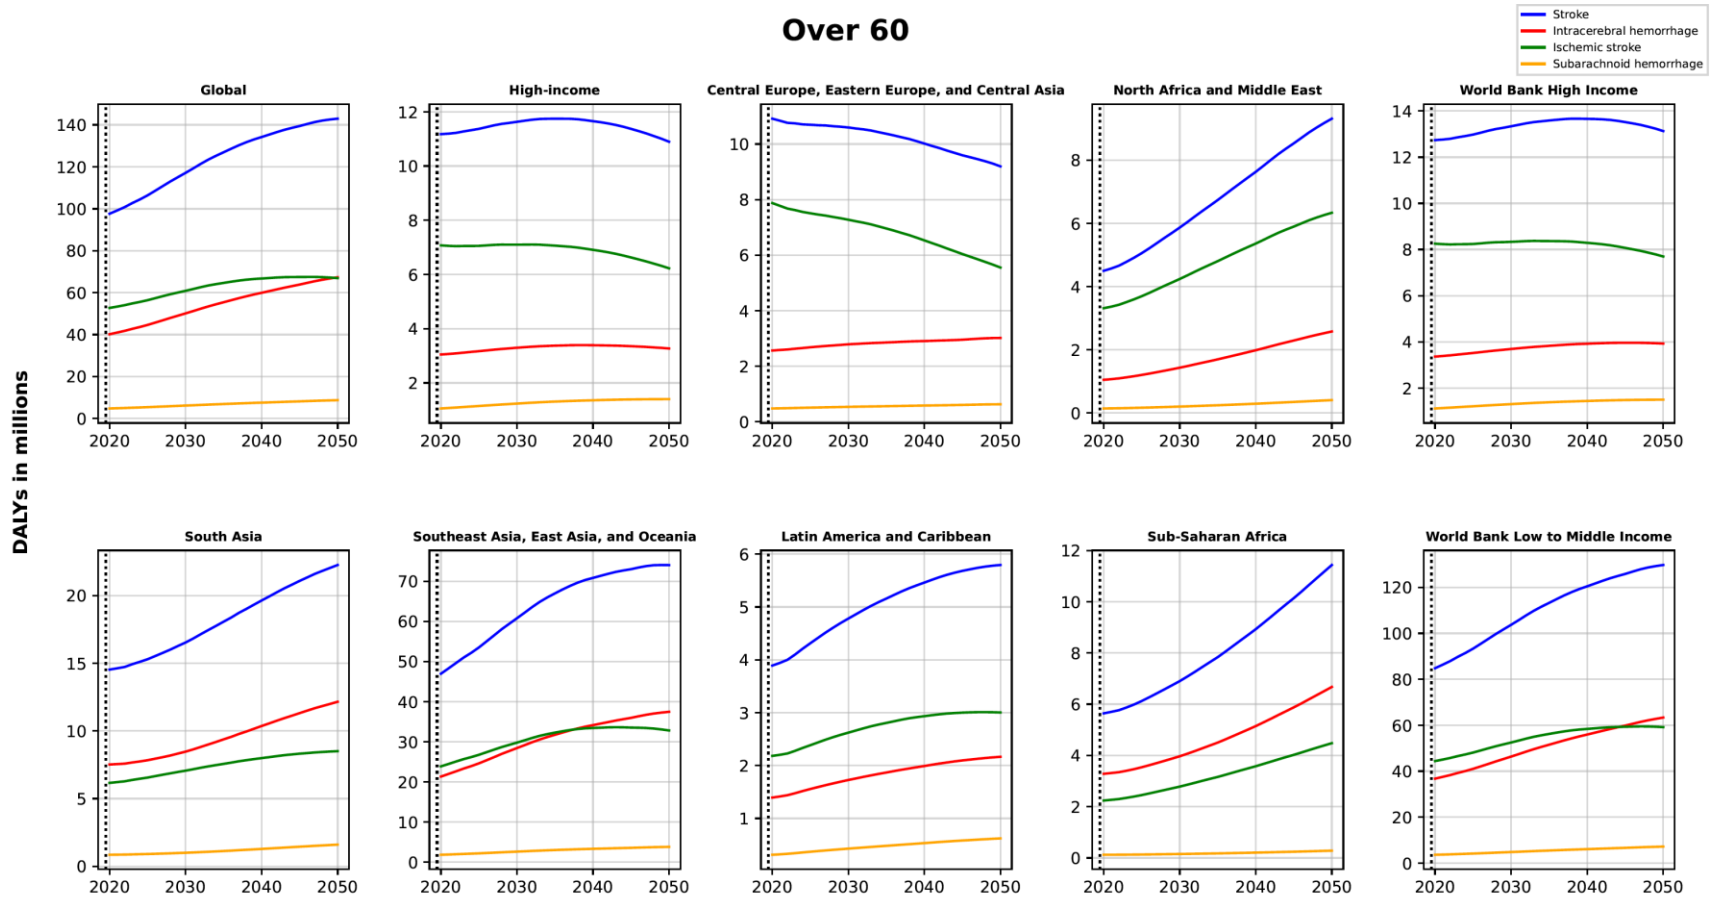

Supplementary Figure 6: Forecasts of age-standardized DALYs rates per 100,000 person-years globally by age group (<60 years, 60+ years), pathological types of stroke (ischaemic stroke, intracerebral haemorrhage, subarachnoid haemorrhage, total strokes), GBD regions and World Bank country income level, 2020-2050

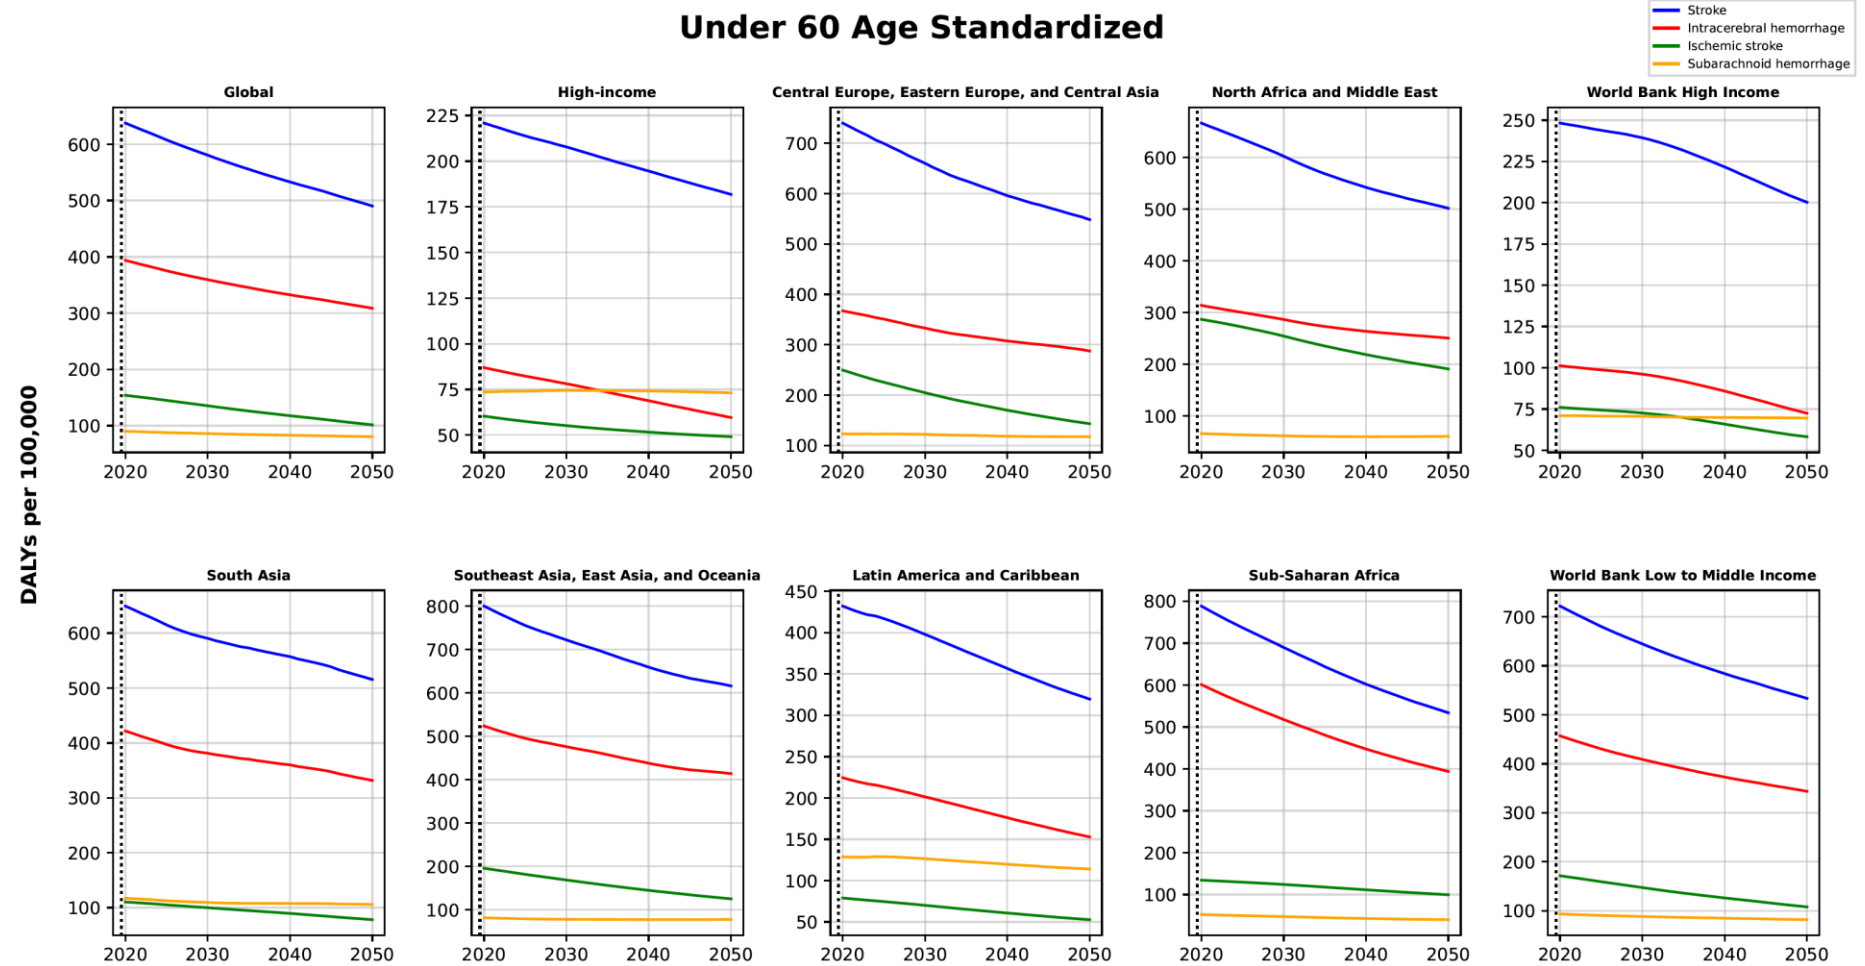

## Over 60 Age Standardized

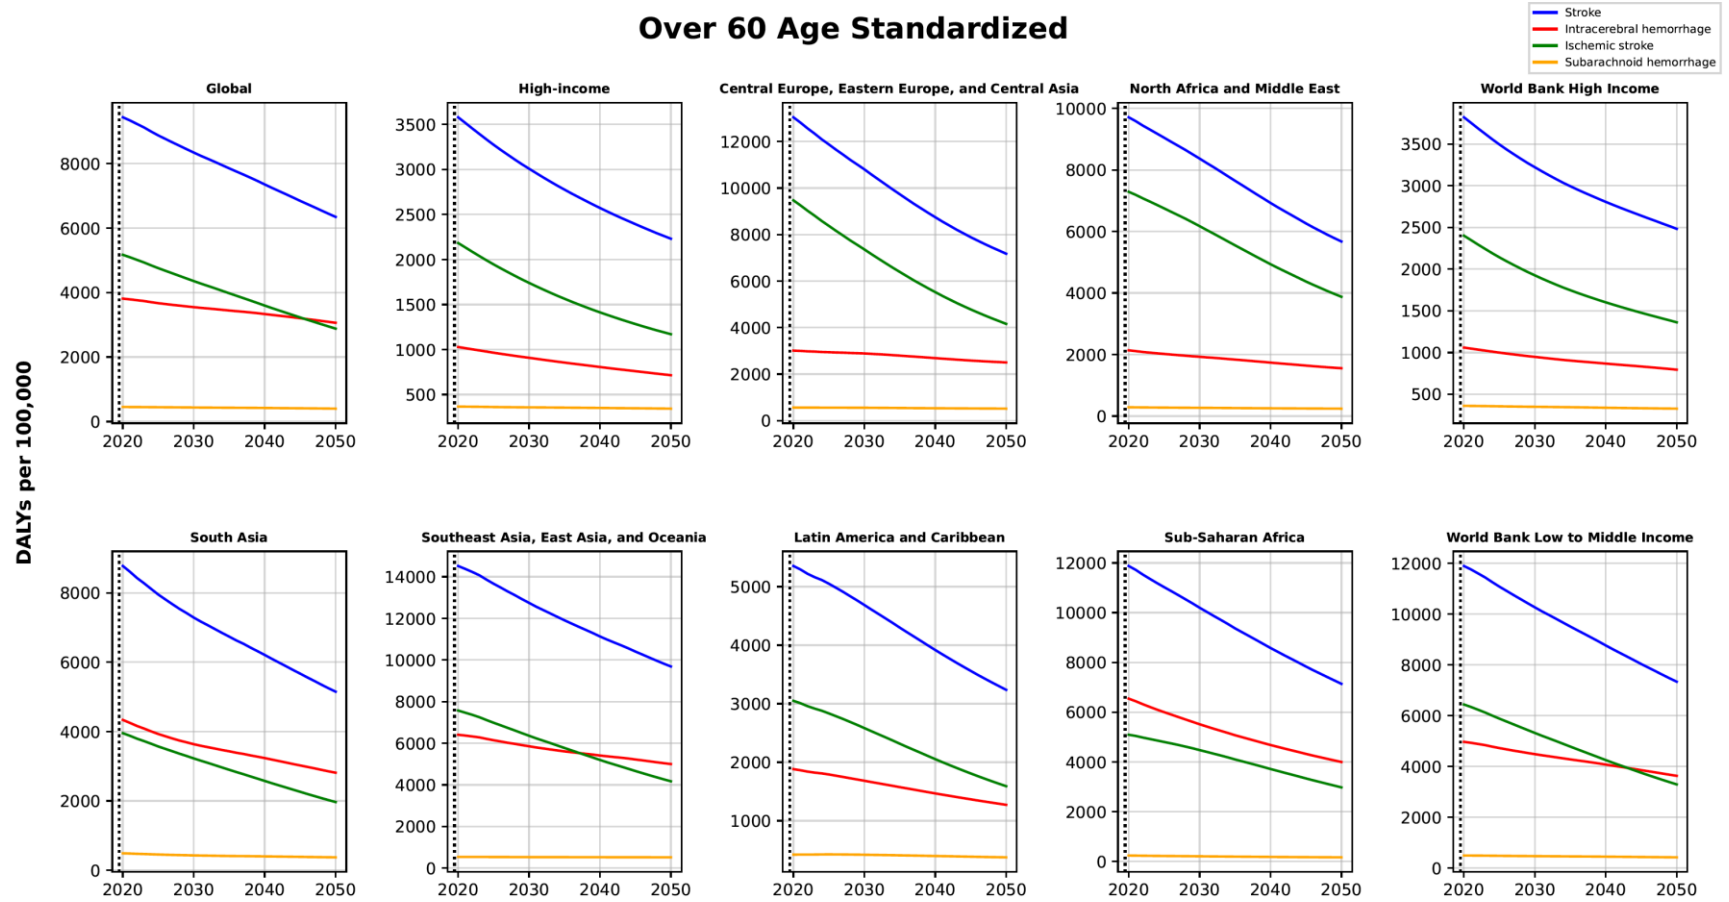

Supplementary Figure 7. Preventing stroke and its major risk factors

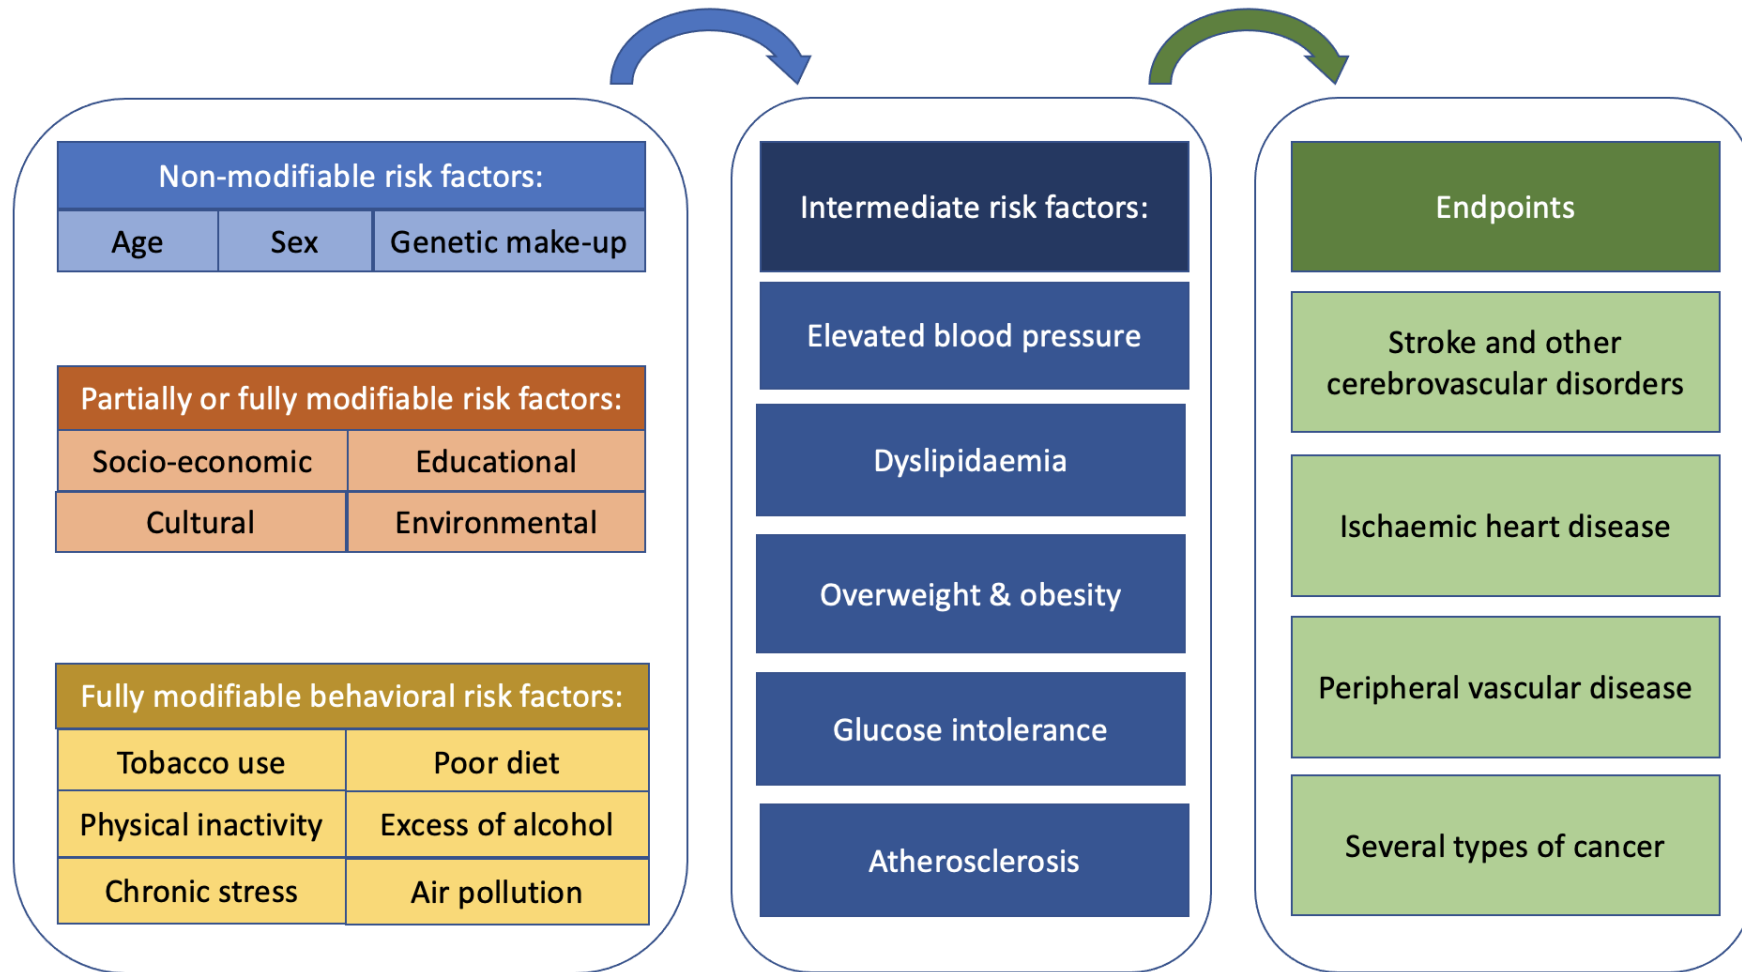

**Supplementary Figure 8: Behavioural Change Wheel**  
 modified from Michie et al.<sup>5</sup>

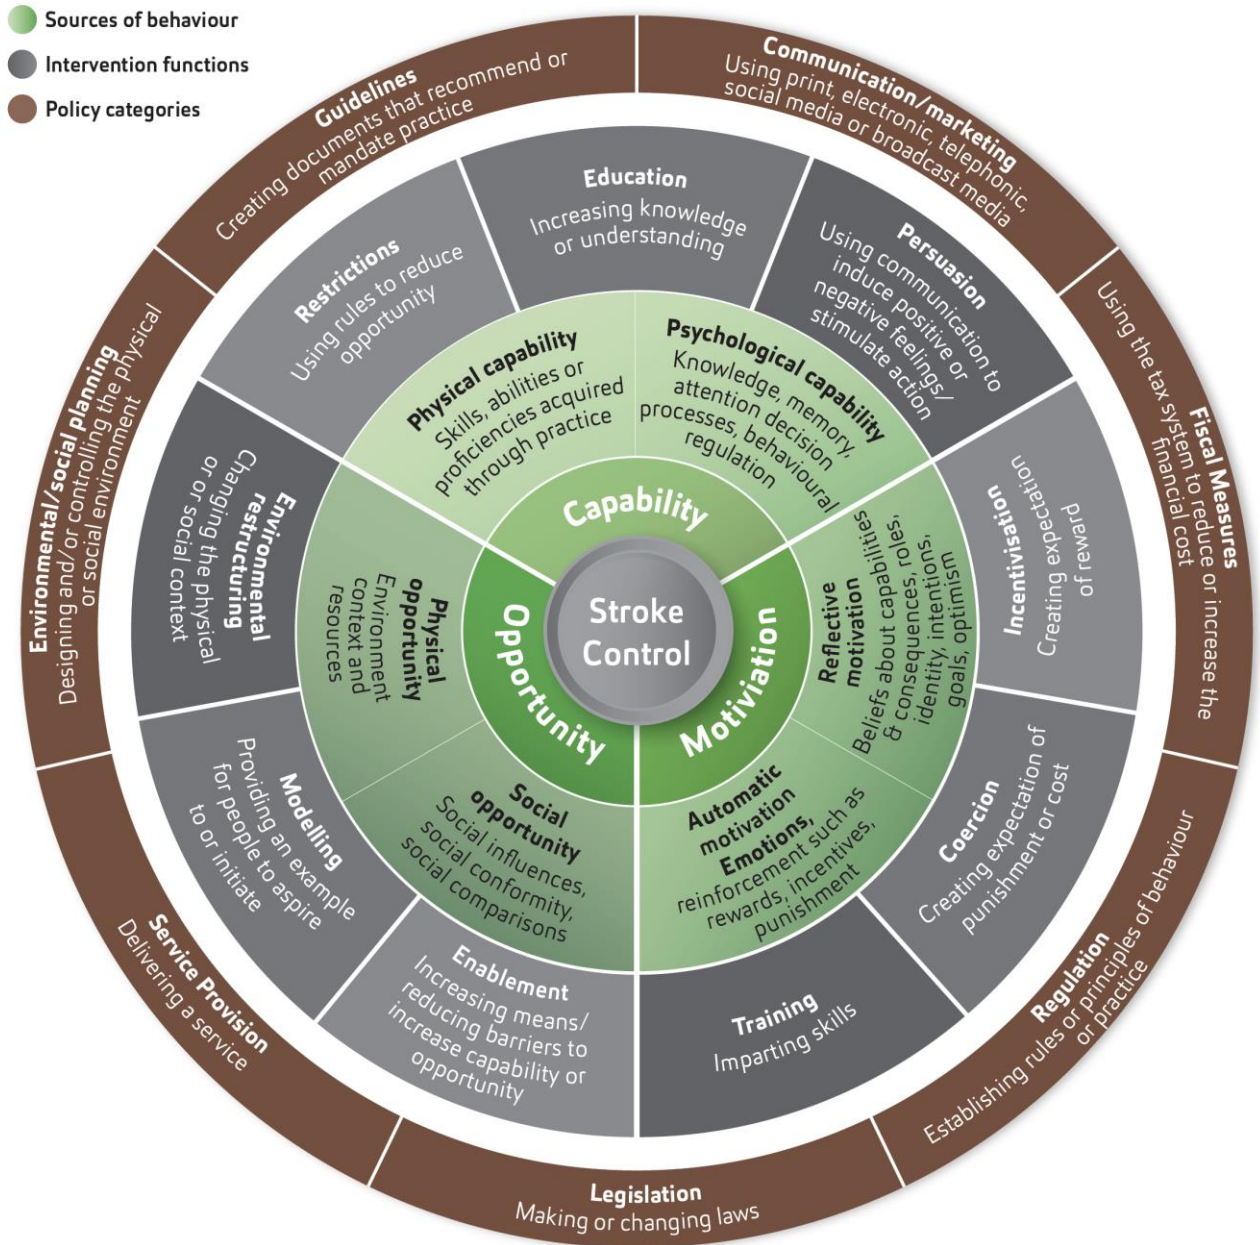



### Supplementary Figure 9 : Neurorehabilitation Services for Stroke

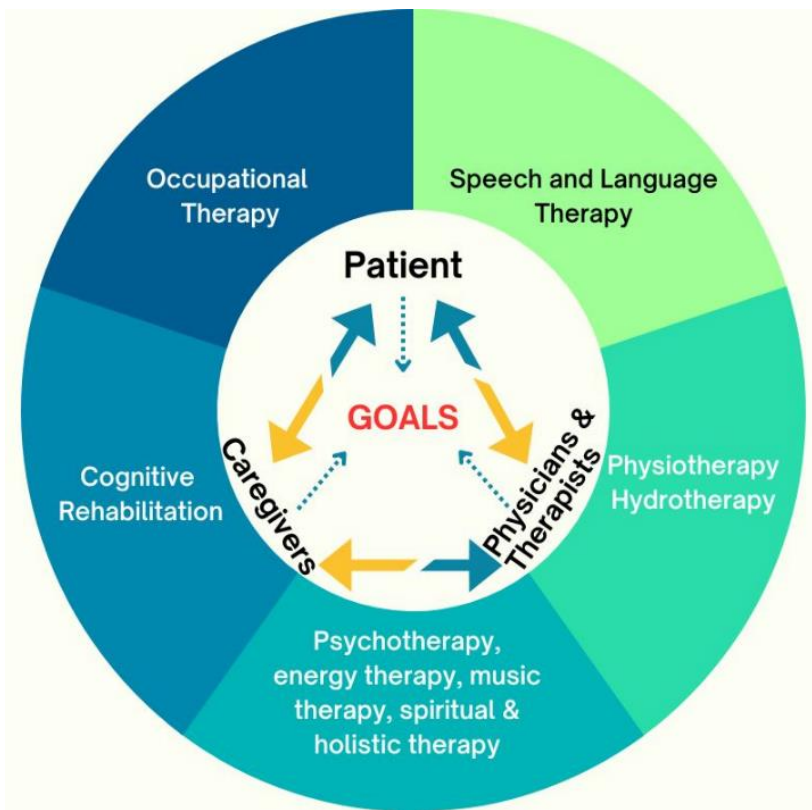

Range of services and care paradigm available at LMIC [eg Blossom Neurorehabilitation Center, Ibadan (Nigeria)] and HICs [eg BDH Klinik, Greifswald (Germany)]: In-patient and out-patient services to facilitate recovery and optimize quality of life of patients are provided by neurologists, physicians (eg cardiologists), neurosurgeons, physiotherapist, psychotherapists, speech and language therapists, occupational therapists, dietitians, nurses, medical officers, client service officers, amongst others. The Center pioneers and propagates Therapeutic services, Research, Enlightenment, Advocacy and conferences, and Training (TREAT) for neurorehabilitation in the region. However, there are a higher number of staff per category for BDH Klinik.

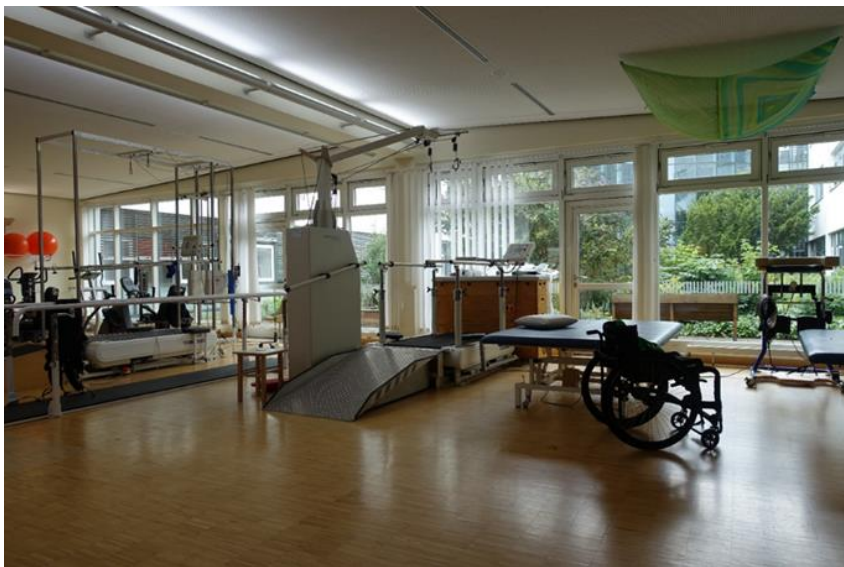

Physiotherapy Gymnasium of the BDH Klinik, Greifswald (Germany)

**Supplementary Table 1. Forecasts of stroke related deaths (counts and rates per 100,000 person-years, with 95% UI) by age group (total, under 60 years old, 60+ years old), GBD super-regions and year (2020 and 2050)**

| GBD super-region                                 | Metric | Year | All ages               | Age-Standardized (AS)<br>Mean (95% UI) | Under 60 years old                      | 60+ years old                           |                         |
|--------------------------------------------------|--------|------|------------------------|----------------------------------------|-----------------------------------------|-----------------------------------------|-------------------------|
|                                                  |        |      | Mean (95% UI)          |                                        | Mean (95% UI)<br>(Rates reported as AS) | Mean (95% UI)<br>(Rates reported as AS) |                         |
| Southeast Asia, East Asia, and Oceania           | Counts | 2020 | 3.06 (2.62-3.46)       |                                        | 0.44 (0.38-0.50)                        | 2.62 (2.23-2.96)                        |                         |
|                                                  |        | 2050 | 4.94 (4.09-5.90)       |                                        | 0.30 (0.22-0.37)                        | 4.65 (3.83-5.51)                        |                         |
|                                                  | Rates  | 2020 | 141.27 (121.11-159.81) |                                        | 127.68 (108.49-144.44)                  | 16.85 (14.51-19.24)                     | 895.16 (761.93-1014.07) |
|                                                  |        | 2050 | 232.25 (192.44-277.01) |                                        | 82.54 (68.37-98.42)                     | 12.39 (9.35-15.59)                      | 568.34 (467.50-677.61)  |
| Central Europe, Eastern Europe, and Central Asia | Counts | 2020 | 0.75 (0.68-0.83)       |                                        | 0.07 (0.07-0.08)                        | 0.68 (0.61-0.75)                        |                         |
|                                                  |        | 2050 | 0.66 (0.56-0.77)       |                                        | 0.04 (0.03-0.07)                        | 0.61 (0.52-0.71)                        |                         |
|                                                  | Rates  | 2020 | 180.57 (162.50-198.46) |                                        | 119.26 (107.35-131.04)                  | 15.71 (13.89-17.55)                     | 836.25 (751.08-917.84)  |
|                                                  |        | 2050 | 164.32 (140.17-192.41) |                                        | 62.53 (51.83-75.21)                     | 10.98 (6.89-16.45)                      | 419.53 (357.46-492.06)  |
| High-income regions                              | Counts | 2020 | 0.81 (0.69-0.91)       |                                        | 0.05 (0.04-0.05)                        | 0.77 (0.64-0.86)                        |                         |
|                                                  |        | 2050 | 0.78 (0.64-0.86)       |                                        | 0.03 (0.03-0.04)                        | 0.75 (0.61-0.86)                        |                         |
|                                                  | Rates  | 2020 | 74.69 (63.41-83.43)    |                                        | 31.49 (27.14-34.92)                     | 3.66 (3.45-3.93)                        | 224.15 (190.90-250.25)  |
|                                                  |        | 2050 | 69.50 (56.73-80.64)    |                                        | 17.21 (14.17-20.20)                     | 2.80 (2.18-3.61)                        | 116.96 (96.01-136.27)   |
| Latin America and Caribbean                      | Counts | 2020 | 0.29 (0.25-0.32)       |                                        | 0.05 (0.05-0.07)                        | 0.23 (0.20-0.26)                        |                         |
|                                                  |        | 2050 | 0.42 (0.32-0.55)       |                                        | 0.05 (0.03-0.08)                        | 0.37 (0.28-0.48)                        |                         |
|                                                  | Rates  | 2020 | 48.58 (43.00-53.88)    |                                        | 49.61 (43.68-54.98)                     | 9.07 (8.07-10.24)                       | 330.39 (285.51-367.33)  |
|                                                  |        | 2050 | 61.80 (46.78-80.77)    |                                        | 29.26 (21.48-39.93)                     | 6.49 (4.08-10.31)                       | 186.95 (140.68-246.18)  |
| North Africa and Middle East                     | Counts | 2020 | 0.32 (0.28-0.36)       |                                        | 0.07 (0.06-0.08)                        | 0.25 (0.22-0.28)                        |                         |
|                                                  |        | 2050 | 0.57 (0.43-0.80)       |                                        | 0.08 (0.05-0.12)                        | 0.50 (0.38-0.67)                        |                         |
|                                                  | Rates  | 2020 | 51.42 (45.70-57.70)    |                                        | 86.57 (77.13-96.40)                     | 12.94 (10.83-15.52)                     | 596.41 (531.95-660.90)  |
|                                                  |        | 2050 | 71.37 (52.93-98.35)    |                                        | 48.23 (36.12-65.80)                     | 9.34 (6.05-14.37)                       | 317.51 (243.27-418.31)  |
| Sub-Saharan Africa                               | Counts | 2020 | 0.41 (0.36-0.46)       |                                        | 0.11 (0.09-0.13)                        | 0.30 (0.26-0.33)                        |                         |
|                                                  |        | 2050 | 0.78 (0.64-0.94)       |                                        | 0.18 (0.13-0.26)                        | 0.60 (0.50-0.69)                        |                         |



|            |        |      |                     |                       |                     |                        |
|------------|--------|------|---------------------|-----------------------|---------------------|------------------------|
|            | Rates  | 2020 | 36.80 (32.30-41.65) | 105.19 (92.64-118.00) | 17.20 (14.15-20.43) | 714.50 (625.28-798.08) |
|            |        | 2050 | 38.62 (31.51-46.47) | 63.06 (52.63-73.21)   | 11.07 (8.01-15.37)  | 423.04 (357.14-484.48) |
| South Asia | Counts | 2020 | 0.99 (0.85-1.15)    |                       | 0.21 (0.18-0.25)    | 0.78 (0.67-0.90)       |
|            |        | 2050 | 1.56 (1.18-2.04)    |                       | 0.29 (0.19-0.44)    | 1.27 (0.97-1.62)       |
|            | Rates  | 2020 | 54.30 (46.78-63.19) | 78.65 (67.53-91.29)   | 14.49 (12.34-17.01) | 522.96 (447.36-605.91) |
|            |        | 2050 | 75.24 (56.80-98.17) | 46.82 (35.04-61.58)   | 11.14 (7.30-17.00)  | 293.92 (222.43-374.88) |

Supplementary Table 2: Forecasts of stroke related DALYs (counts and rates per 100,000 person-years, with 95% UI) by age group (total, under 60 years old, 60+ years old), GBD super-regions and year (2020 and 2050)

| GBD super-region                                 | Metric | Year | All ages                  | Age-Standardized (AS)     | Under 60 years old                      | 60+ years old                           |
|--------------------------------------------------|--------|------|---------------------------|---------------------------|-----------------------------------------|-----------------------------------------|
|                                                  |        |      | Counts/rates (95% UI)     | rates (95% UI)            | Mean (95% UI)<br>(Rates reported as AS) | Mean (95% UI)<br>(Rates reported as AS) |
| Southeast Asia, East Asia, and Oceania           | Counts | 2020 | 67.10 (58.43-75.85)       |                           | 20.14 (17.56-22.99)                     | 46.95 (40.65-53.10)                     |
|                                                  |        | 2050 | 87.98 (74.61-103.26)      |                           | 13.93 (11.08-17.13)                     | 74.06 (62.82-86.76)                     |
|                                                  | Rates  | 2020 | 3098.72 (2698.22-3503.00) | 2531.07 (2210.74-2852.43) | 800.34 (695.10-911.04)                  | 14515.87 (12576.37-16386.97)            |
|                                                  |        | 2050 | 4133.29 (3505.36-4851.04) | 1760.79 (1481.49-2070.58) | 616.17 (486.88-760.68)                  | 9686.91 (8255.21-11348.06)              |
| Central Europe, Eastern Europe, and Central Asia | Counts | 2020 | 14.27 (12.85-15.64)       |                           | 3.35 (2.98-3.76)                        | 10.92 (9.86-11.94)                      |
|                                                  |        | 2050 | 11.35 (9.72-13.10)        |                           | 2.15 (1.59-2.86)                        | 9.20 (8.09-10.40)                       |
|                                                  | Rates  | 2020 | 3415.23 (3075.35-3742.91) | 2292.02 (2064.62-2511.35) | 739.83 (655.81-829.48)                  | 13040.44 (11771.67-14273.44)            |
|                                                  |        | 2050 | 2844.59 (2435.30-3283.44) | 1384.40 (1148.25-1660.84) | 548.22 (401.81-739.17)                  | 7174.71 (6260.53-8178.47)               |
| High-income regions                              | Counts | 2020 | 13.72 (12.28-14.96)       |                           | 2.54 (2.30-2.83)                        | 11.17 (9.89-12.27)                      |
|                                                  |        | 2050 | 12.89 (10.93-14.57)       |                           | 1.99 (1.67-2.41)                        | 10.89 (9.31-12.32)                      |
|                                                  | Rates  | 2020 | 1261.84 (1129.63-1375.59) | 644.58 (578.00-706.37)    | 220.88 (199.20-247.14)                  | 3578.56 (3178.25-3923.08)               |
|                                                  |        | 2050 | 1150.90 (976.25-1300.84)  | 440.32 (375.18-507.88)    | 181.82 (150.95-222.68)                  | 2230.38 (1893.56-2519.85)               |
| Latin America and Caribbean                      | Counts | 2020 | 6.29 (5.69-6.96)          |                           | 2.40 (2.13-2.69)                        | 3.89 (3.49-4.32)                        |
|                                                  |        | 2050 | 8.05 (6.47-10.20)         |                           | 2.26 (1.66-3.20)                        | 5.79 (4.71-7.09)                        |
|                                                  | Rates  | 2020 | 1069.91 (951.33-1166.16)  | 1053.01 (951.34-1166.16)  | 432.15 (383.19-484.38)                  | 5352.31 (4787.79-5951.93)               |
|                                                  |        | 2050 | 1193.46 (958.46-1511.55)  | 687.61 (539.05-900.33)    | 319.56 (231.30-460.02)                  | 3236.32 (2639.65-4016.78)               |
| North Africa and Middle East                     | Counts | 2020 | 8.10 (7.15-9.10)          |                           | 3.60 (3.03-4.23)                        | 4.50 (4.02-4.93)                        |
|                                                  |        | 2050 | 13.42 (10.51-17.50)       |                           | 4.11 (2.95-5.78)                        | 9.31 (7.45-11.96)                       |
|                                                  | Rates  | 2020 | 1313.40 (1159.24-1476.81) | 1807.75 (1596.44-2017.88) | 666.19 (561.98-781.43)                  | 9712.70 (8694.54-10725.79)              |
|                                                  |        | 2050 | 1653.14 (1294.32-2154.86) | 1154.33 (895.49-1521.04)  | 501.50 (358.19-710.24)                  | 5674.98 (4573.65-7234.60)               |
|                                                  | Counts | 2020 | 11.04 (9.57-12.59)        |                           | 5.39 (4.56-6.33)                        | 5.64 (4.99-6.31)                        |

|                    |        |      |                           |                           |                        |                              |
|--------------------|--------|------|---------------------------|---------------------------|------------------------|------------------------------|
| Sub-Saharan Africa |        | 2050 | 20.51 (16.89-24.98)       |                           | 9.07 (6.90-12.08)      | 11.43 (9.86-13.04)           |
|                    | Rates  | 2020 | 998.46 (865.76-1138.49)   | 2187.52 (1927.11-2473.86) | 788.34 (666.08-924.39) | 11876.43 (10522.85-13271.60) |
|                    |        | 2050 | 1009.79 (831.57-1229.82)  | 1367.36 (1151.33-1606.96) | 533.78 (407.41-709.48) | 6576.47 (5670.19-7498.59)    |
| South Asia         | Counts | 2020 | 24.33 (21.40-28.18)       |                           | 9.80 (8.50-11.43)      | 14.53 (12.65-16.89)          |
|                    |        | 2050 | 35.16 (27.82-45.23)       |                           | 12.89 (9.50-17.72)     | 22.26 (17.97-27.69)          |
|                    | Rates  | 2020 | 1336.09 (1174.54-1547.30) | 1674.76 (1467.14-1945.97) | 649.37 (562.23-758.80) | 8775.28 (7640.72-10189.38)   |
|                    |        | 2050 | 1690.59 (1338.26-2175.00) | 1100.40 (865.51-14.25.27) | 515.61 (379.82-711.18) | 5149.84 (4149.83-6403.86)    |

**Supplementary Table 3: Global forecasts of stroke related deaths and DALYs (counts and age-standardized rates per 100,000 person-years, with 95% UI) by stroke type (IS – ischaemic stroke, ICH – intracerebral haemorrhage, SAH – subarachnoid haemorrhage), age group (total, under 60 years old, 60+ years old), and year (2020 and 2050)**

| Type of stroke | Year | Metric                 | Projected estimates of deaths: Mean (95% UI) |                        |                        | Projected estimates of DALYs: Mean (95% UI) |                           |                           |
|----------------|------|------------------------|----------------------------------------------|------------------------|------------------------|---------------------------------------------|---------------------------|---------------------------|
|                |      |                        | Under 60 years                               | 60+ years              | Total                  | Under 60 years                              | 60+ years                 | Total                     |
| IS             | 2020 | Counts                 | 0.18 (0.16-0.21)                             | 3.12 (2.81-3.38)       | 3.31 (2.98-3.58)       | 11.42 (9.81-13.09)                          | 52.70 (47.57-57.67)       | 64.11 (57.47-70.40)       |
|                |      |                        | 2050                                         | 0.11 (0.08-0.17)       | 3.87 (3.21-4.60)       | 4.00 (3.29-4.75)                            | 9.42 (7.33-11.81)         | 66.91 (56.56-78.28)       |
|                | 2020 | Age-standardized rates | 2.45 (2.17-2.74)                             | 320.77 (286.71-347.95) | 42.62 (38.23-46.20)    | 153.88 (132.32-176.66)                      | 5170.52 (4665.88-5662.86) | 786.92 (706.13-864.10)    |
|                |      |                        | 2050                                         | 1.16 (0.77-1.72)       | 154.46 (127.28-184.80) | 20.50 (16.81-24.68)                         | 101.42 (78.77-127.76)     | 2881.74 (2423.50-3389.98) |
| ICH            | 2020 | Counts                 | 0.68 (0.61-0.74)                             | 2.25 (2.01-2.45)       | 2.93 (2.65-3.19)       | 29.25 (26.41-31.99)                         | 40.15 (36.52-43.54)       | 69.40 (63.54-75.35)       |
|                |      |                        | 2050                                         | 0.70 (0.56-0.89)       | 4.39 (3.82-4.95)       | 5.10 (4.42-5.78)                            | 29.57 (23.32-37.67)       | 67.32 (58.24-77.27)       |
|                | 2020 | Age-standardized rates | 10.08 (9.06-10.97)                           | 212.06 (189.37-230.59) | 35.75 (32.20-38.85)    | 393.75 (355.16-430.37)                      | 3811.23 (3462.76-4133.93) | 824.99 (756.20-895.45)    |
|                |      |                        | 2050                                         | 9.86 (7.78-12.53)      | 208.80 (181.83-235.46) | 29.78 (35.70-34.29)                         | 308.55 (241.47-397.86)    | 3063.13 (2636.05-3545.24) |
| SAH            | 2020 | Counts                 | 0.13 (0.11-0.16)                             | 0.25 (0.21-0.27)       | 0.38 (0.33-0.42)       | 6.57 (5.66-7.78)                            | 4.76 (4.20-5.26)          | 11.33 (9.96-12.78)        |
|                |      |                        | 2050                                         | 0.16 (0.10-0.23)       | 0.49 (0.35-0.68)       | 0.65 (0.47-0.89)                            | 7.41 (4.69-10.86)         | 8.71 (6.18-12.03)         |
|                | 2020 |                        | 1.81 (1.55-2.17)                             | 24.16 (20.90-26.72)    | 4.63 (4.07-5.15)       | 90.00 (77.50-106.87)                        | 452.89 (400.11-499.95)    | 135.79 (119.63-153.19)    |

|  |      |                        |                  |                     |                  |                      |                        |                       |
|--|------|------------------------|------------------|---------------------|------------------|----------------------|------------------------|-----------------------|
|  | 2050 | Age-standardized rates | 1.63 (1.03-2.46) | 21.15 (15.03-29.17) | 4.09 (2.87-5.68) | 80.32 (50.56-118.35) | 400.71 (280.68-555.91) | 120.75 (81.48-172.88) |
|--|------|------------------------|------------------|---------------------|------------------|----------------------|------------------------|-----------------------|

**Supplementary Table 4. Income losses due to incident stroke cases in 2017 and 2050 (in billions 2017 US\$)**

| <b>World Bank country classification by income level</b> | <b>2017</b> | <b>2050</b> |
|----------------------------------------------------------|-------------|-------------|
| High-Income countries                                    | 289.1       | 281.0       |
| Upper Middle-Income countries                            | 241.0       | 206.8-432.8 |
| Lower Middle-Income countries                            | 43.6        | 147.6       |
| Low Income countries                                     | 2.0         | 8.6         |
| Global Total                                             | 575.7       | 644.0-870.0 |

Note: 2017 estimates are from Table 4 of the Supplementary Appendix in Owolabi et. al.<sup>1</sup> 2050 estimates are based on projected gross domestic product (GDP) per worker estimates for 2050 as outlined in the accompanying methodological note, with the range for Upper Middle-Income Countries reflecting two different assumptions about projected rate of growth of GDP per capita in China.<sup>113</sup>

**Supplementary Table 5. Direct Costs and income losses due to stroke in 2017 and 2050 (in billions 2017 US\$)**

| <b>World Bank country classification by income level</b> | <b>2017 (Low)</b> | <b>2017 (High)</b> | <b>2050 (Low)</b> | <b>2050 (High)</b> |
|----------------------------------------------------------|-------------------|--------------------|-------------------|--------------------|
| High-Income countries                                    | 417.0             | 597.6              | 436.6-655.9       | 578.3-997.0        |
| Upper Middle-Income countries                            | 279.1             | 410.0              | 273.5-743.6       | 334.2-1,026.4      |
| Lower Middle-Income countries                            | 48.3              | 64.8               | 159.5-200.4       | 170.4-252.5        |
| Low Income countries                                     | 2.6               | 4.9                | 11.2-22.0         | 13.5-34.1          |
| Global Total                                             | 745.9             | 1,077.2            | 880.8-1,621.9     | 1,096.4-2,310.0    |

Supplementary Table 6. Coverage, current capacity for stroke surveillance, and estimated unmet needs

| Country                          | Population size (in millions) <sup>a</sup> | Last risk factors surveillance and assessments conducted <sup>b</sup>       |              |    |           |                          |                 | National stroke registry <sup>c</sup> | National surveillance of risk factors for stroke                  | Surveillance of stroke incidence through national registries                              |
|----------------------------------|--------------------------------------------|-----------------------------------------------------------------------------|--------------|----|-----------|--------------------------|-----------------|---------------------------------------|-------------------------------------------------------------------|-------------------------------------------------------------------------------------------|
|                                  |                                            | Survey name (year), reference                                               | Anthropology | BP | Lab tests | Behavioural surveillance | Metabolic risks |                                       |                                                                   |                                                                                           |
| Afghanistan                      | 48.09                                      | STEPS (2018) <sup>114</sup>                                                 | ✓            | ✓  | ✓         | ✓                        | ✓               | x                                     | Recent and comprehensive survey undertaken                        | National capacity for stroke surveillance through registries required                     |
| Albania                          | 2.73                                       | EHIS (2020) <sup>115</sup>                                                  | ✓            | ✓  | x         | ✓                        | ✓               | x                                     | Recent survey undertaken, but lacking biochemical measures        | National capacity for stroke surveillance through registries required                     |
| Algeria                          | 50.36                                      | STEPS (2016-2017) <sup>114</sup>                                            | ✓            | ✓  | ✓         | ✓                        | ✓               | x                                     | More comprehensive and/or recent survey required                  | National capacity for stroke surveillance through registries required                     |
| Andorra                          | 0.08                                       | NHS (2011) <sup>116</sup>                                                   | ✓            | x  | x         | ✓                        | x               | x                                     | More comprehensive and/or recent survey required                  | National capacity for stroke surveillance through registries required                     |
| Angola                           | 44.83                                      | DHS (2015-16) <sup>117</sup>                                                | x            | x  | x         | ✓                        | x               | x                                     | More comprehensive and/or recent survey required                  | National capacity for stroke surveillance through registries required                     |
| Anguilla                         | 0.02                                       | STEPS (2016) <sup>114</sup>                                                 | ✓            | ✓  | ✓         | ✓                        | ✓               | x                                     | More comprehensive and/or recent survey required                  | National capacity for stroke surveillance through registries required                     |
| Antigua and Barbuda <sup>e</sup> | 0.10                                       | -                                                                           | -            | -  | -         | -                        | -               | x                                     | No information on risk factor survey found                        | National capacity for stroke surveillance through registries required                     |
| Argentina                        | 49.24                                      | National Survey of Chronic Disease Risk Factors (CDRF; 2018) <sup>118</sup> | ✓            | ✓  | x         | ✓                        | ✓               | ✓                                     | Recent survey undertaken, but lacking biochemical measures        | National capacity for stroke surveillance through registries could be expanded nationwide |
| Armenia                          | 2.97                                       | DHS (2015-2016) <sup>119</sup>                                              | x            | x  | x         | ✓                        | x               | x                                     | More comprehensive and/or recent survey required                  | National capacity for stroke surveillance through registries required                     |
| Aruba                            | 0.11                                       | STEPS (2006) <sup>114</sup>                                                 | ✓            | ✓  | ✓         | ✓                        | ✓               | x                                     | More comprehensive and/or recent survey required                  | National capacity for stroke surveillance through registries required                     |
| Australia                        | 28.06                                      | National Health Survey (NHS; 2017-2018) <sup>119</sup>                      | ✓            | ✓  | x         | ✓                        | ✓               | ✓                                     | Recent survey undertaken, but lacking biochemical measures        | National capacity for stroke surveillance through registries could be expanded nationwide |
| Austria                          | 9.06                                       | EHIS (2019) <sup>115</sup>                                                  | ✓            | x  | x         | ✓                        | ✓               | ✓                                     | Recent survey undertaken, but lacking BP and biochemical measures | National capacity for stroke surveillance through registries could be expanded nationwide |
| Azerbaijan                       | 10.65                                      | STEPS (2017) <sup>114</sup>                                                 | ✓            | ✓  | ✓         | ✓                        | ✓               | x                                     | More comprehensive and/or recent survey required                  | National capacity for stroke surveillance through registries required                     |
| Bahamas                          | 0.43                                       | STEPS (2011-2012) <sup>114</sup>                                            | ✓            | ✓  | ✓         | ✓                        | ✓               | x                                     | More comprehensive and/or recent survey required                  | National capacity for stroke surveillance through registries required                     |
| Bahrain                          | 2.01                                       | STEPS (2007) <sup>114</sup>                                                 | ✓            | ✓  | ✓         | ✓                        | ✓               | ✓                                     | More comprehensive and/or recent survey required                  | Have capacity for national stroke surveillance through registries                         |
| Bangladesh                       | 178.99                                     | DHS (2017-2018) <sup>120</sup>                                              | ✓            | ✓  | ✓         | ✓                        | ✓               | x                                     | Recent and comprehensive survey undertaken                        | National capacity for stroke surveillance through registries required                     |
| Barbados                         | 0.29                                       | STEPS (2007) <sup>114</sup>                                                 | ✓            | ✓  | ✓         | ✓                        | ✓               | x                                     | More comprehensive and/or recent survey required                  | National capacity for stroke surveillance through registries required                     |

|                          |        |                                                                  |   |   |   |   |   |   |                                                                                           |                                                                                           |
|--------------------------|--------|------------------------------------------------------------------|---|---|---|---|---|---|-------------------------------------------------------------------------------------------|-------------------------------------------------------------------------------------------|
| Belarus                  | 9.16   | STEPS (2016-2017) <sup>114</sup>                                 | ✓ | ✓ | ✓ | ✓ | ✓ | x | More comprehensive and/or recent survey required                                          | National capacity for stroke surveillance through registries required                     |
| Belgium                  | 11.84  | EHIS & EHES (2018) <sup>115,121</sup>                            | ✓ | ✓ | ✓ | ✓ | ✓ | x | Recent and comprehensive survey undertaken                                                | National capacity for stroke surveillance through registries required                     |
| Belize                   | 0.47   | Central America Diabetes Initiative (CAMDI; 2009) <sup>122</sup> | ✓ | ✓ | ✓ | ✓ | ✓ | x | More comprehensive and/or recent survey required                                          | National capacity for stroke surveillance through registries required                     |
| Benin                    | 15.67  | DHS (2017-2018) <sup>123</sup>                                   | ✓ | x | x | x | x | x | Recent survey undertaken, but lacking measurements of BP and other important risk factors | National capacity for stroke surveillance through registries required                     |
| Bermuda                  | 0.06   | STEPS (2014) <sup>114</sup>                                      | ✓ | ✓ | ✓ | ✓ | ✓ | x | More comprehensive and/or recent survey required                                          | National capacity for stroke surveillance through registries required                     |
| Bhutan                   | 0.84   | STEPS (2019) <sup>114</sup>                                      | ✓ | ✓ | ✓ | ✓ | ✓ | x | Recent and comprehensive survey undertaken                                                | National capacity for stroke surveillance through registries required                     |
| Bolivia                  | 13.24  | DHS (2016) <sup>124</sup>                                        | ✓ | x | x | ✓ | ✓ | x | More comprehensive and/or recent survey required                                          | National capacity for stroke surveillance through registries required                     |
| Bosnia and Herzegovina   | 3.13   | NHS (2012) <sup>125</sup>                                        | ✓ | ✓ | ✓ | ✓ | ✓ | x | More comprehensive and/or recent survey required                                          | National capacity for stroke surveillance through registries required                     |
| Botswana                 | 2.77   | STEPS (2014) <sup>114</sup>                                      | ✓ | ✓ | ✓ | ✓ | ✓ | x | More comprehensive and/or recent survey required                                          | National capacity for stroke surveillance through registries required                     |
| Brazil                   | 223.85 | NHS (2019) <sup>126</sup>                                        | ✓ | x | x | ✓ | ✓ | x | Recent survey undertaken, but lacking BP and biochemical measures                         | National capacity for stroke surveillance through registries required                     |
| British Virgin Islands   | 0.03   | STEPS (2009) <sup>114</sup>                                      | ✓ | ✓ | ✓ | ✓ | ✓ | x | More comprehensive and/or recent survey required                                          | National capacity for stroke surveillance through registries required                     |
| Brunei Darussalam        | 0.47   | STEPS (2015-2016) <sup>114</sup>                                 | ✓ | ✓ | ✓ | ✓ | ✓ | x | More comprehensive and/or recent survey required                                          | National capacity for stroke surveillance through registries required                     |
| Bulgaria                 | 6.41   | EHIS (2019) <sup>115,127</sup>                                   | ✓ | x | x | ✓ | ✓ | x | Recent survey undertaken, but lacking BP and biochemical measures                         | National capacity for stroke surveillance through registries required                     |
| Burkina Faso             | 27.40  | STEPS (2013) <sup>114</sup>                                      | ✓ | ✓ | ✓ | ✓ | ✓ | x | More comprehensive and/or recent survey required                                          | National capacity for stroke surveillance through registries required                     |
| Burundi                  | 15.77  | DHS (2016-2017) <sup>128</sup>                                   | x | x | x | ✓ | ✓ | x | More comprehensive and/or recent survey required                                          | National capacity for stroke surveillance through registries required                     |
| Cambodia                 | 18.78  | DHS (2014) <sup>129</sup>                                        | x | x | x | ✓ | x | x | More comprehensive and/or recent survey required                                          | National capacity for stroke surveillance through registries required                     |
| Cameroon                 | 33.77  | DHS (2018-2019) <sup>130</sup>                                   | x | x | x | x | x | x | Recent survey lacks measures of stroke risk factors                                       | National capacity for stroke surveillance through registries required                     |
| Canada                   | 40.92  | Canadian Health Measures Survey (CHMS; 2018-2019) <sup>131</sup> | ✓ | ✓ | ✓ | ✓ | ✓ | ✓ | Recent and comprehensive survey undertaken                                                | National capacity for stroke surveillance through registries could be expanded nationwide |
| Cape Verde               | 0.61   | STEPS (2007) <sup>114</sup>                                      | ✓ | ✓ | ✓ | ✓ | ✓ | x | More comprehensive and/or recent survey required                                          | National capacity for stroke surveillance through registries required                     |
| Cayman Islands           | 0.07   | STEPS (2012) <sup>114</sup>                                      | ✓ | ✓ | ✓ | ✓ | ✓ | x | More comprehensive and/or recent survey required                                          | National capacity for stroke surveillance through registries required                     |
| Central African Republic | 5.94   | STEPS (2017) <sup>114</sup>                                      | ✓ | ✓ | ✓ | ✓ | ✓ | x | More comprehensive and/or recent survey required                                          | National capacity for stroke surveillance through registries required                     |
| Chad                     | 21.69  | DHS (2014-15) <sup>132</sup>                                     | x | x | x | ✓ | x | x | More comprehensive and/or recent survey required                                          | National capacity for stroke surveillance through registries required                     |



|                                       |         |                                                                                                   |   |   |   |   |   |   |                                                                   |                                                                                           |
|---------------------------------------|---------|---------------------------------------------------------------------------------------------------|---|---|---|---|---|---|-------------------------------------------------------------------|-------------------------------------------------------------------------------------------|
| Chile                                 | 19.46   | CNHS (2016-2017) <sup>133</sup>                                                                   | ✓ | ✓ | ✓ | ✓ | ✓ | x | More comprehensive and/or recent survey required                  | National capacity for stroke surveillance through registries required                     |
| China                                 | 1430.16 | China National Health Survey (CHNS; 2015-2017) <sup>134</sup>                                     | ✓ | ✓ | ✓ | ✓ | ✓ | ✓ | More comprehensive and/or recent survey required                  | National capacity for stroke surveillance through registries could be expanded nationwide |
| Colombia                              | 53.42   | DHS (2015-2016) <sup>135</sup>                                                                    | ✓ | x | x | x | x | x | More comprehensive and/or recent survey required                  | National capacity for stroke surveillance through registries required                     |
| Comoros                               | 1.06    | DHS (2012) <sup>136</sup>                                                                         | x | x | x | ✓ | x | x | More comprehensive and/or recent survey required                  | National capacity for stroke surveillance through registries required                     |
| Congo                                 | 7.02    | DHS (2011-12) <sup>137</sup>                                                                      | x | x | x | ✓ | x | x | More comprehensive and/or recent survey required                  | National capacity for stroke surveillance through registries required                     |
| Congo, Dem. Rep.                      | 120.05  | DHS (2013-2014) <sup>138</sup>                                                                    | x | x | x | x | x | x | Recent survey lacks measures of stroke risk factors               | National capacity for stroke surveillance through registries required                     |
| Cook Islands                          | 0.02    | STEPS (2013-2015) <sup>114</sup>                                                                  | ✓ | ✓ | ✓ | ✓ | ✓ | x | More comprehensive and/or recent survey required                  | National capacity for stroke surveillance through registries required                     |
| Costa Rica                            | 5.47    | CAMDI; 2002-2006) <sup>139</sup>                                                                  | ✓ | ✓ | ✓ | ✓ | ✓ | x | More comprehensive and/or recent survey required                  | National capacity for stroke surveillance through registries required                     |
| Cote d'Ivoire                         | 33.71   | DHS (2011-2012) <sup>140</sup>                                                                    | x | x | x | ✓ | x | x | More comprehensive and/or recent survey required                  | National capacity for stroke surveillance through registries required                     |
| Croatia                               | 3.70    | SHARE (Wave 8; 2019-2020); <sup>141</sup> EHS (2019) <sup>115</sup>                               | ✓ | x | x | ✓ | ✓ | x | Recent survey undertaken, but lacking BP and biochemical measures | National capacity for stroke surveillance through registries required                     |
| Cuba                                  | 11.14   | -                                                                                                 | - | - | - | - | - | x | No information on risk factor survey found                        | National capacity for stroke surveillance through registries required                     |
| Cyprus                                | 1.27    | EHIS (2019) <sup>115</sup>                                                                        | ✓ | x | x | ✓ | ✓ | x | Recent survey undertaken, but lacking BP and biochemical measures | National capacity for stroke surveillance through registries required                     |
| Czechia                               | 10.69   | NIPH (2020); SHARE (Wave 8; 2019-2020); <sup>141</sup> EHS & EHES (2019) <sup>115</sup>           | ✓ | ✓ | ✓ | ✓ | ✓ | ✓ | Recent and comprehensive survey undertaken                        | Have capacity for national stroke surveillance through registries                         |
| Democratic People's Republic of Korea | 26.65   | STEPS (2008) <sup>114</sup>                                                                       | ✓ | ✓ | ✓ | ✓ | ✓ | x | More comprehensive and/or recent survey required                  | National capacity for stroke surveillance through registries required                     |
| Denmark                               | 6.03    | DNHS (2017) <sup>142</sup><br>SHARE (Wave 8; 2019-2020); <sup>141</sup> EHS (2019) <sup>115</sup> | ✓ | x | x | ✓ | ✓ | ✓ | Recent survey undertaken, but lacking BP and biochemical measures | National capacity for stroke surveillance through registries could be expanded nationwide |
| Djibouti                              | 1.12    | -                                                                                                 | - | - | - | - | - | x | No information on risk factor survey found                        | National capacity for stroke surveillance through registries required                     |
| Dominica                              | 0.07    | STEPS (2008) <sup>114</sup>                                                                       | ✓ | ✓ | ✓ | ✓ | ✓ | x | More comprehensive and/or recent survey required                  | National capacity for stroke surveillance through registries required                     |
| Dominican Republic                    | 11.77   | DHS (2013) <sup>143</sup>                                                                         | ✓ | x | x | ✓ | ✓ | x | More comprehensive and/or recent survey required                  | National capacity for stroke surveillance through registries required                     |
| Ecuador                               | 19.82   | STEPS (2018) <sup>114</sup>                                                                       | ✓ | ✓ | ✓ | ✓ | ✓ | x | Recent and comprehensive survey undertaken                        | National capacity for stroke surveillance through registries required                     |
| Egypt, Arab Rep.                      | 120.83  | DHS (2015) <sup>144</sup>                                                                         | ✓ | ✓ | x | ✓ | ✓ | x | More comprehensive and/or recent survey required                  | National capacity for stroke surveillance through registries required                     |
| El Salvador                           | 6.78    | CAMDI (2011) <sup>139</sup>                                                                       | ✓ | ✓ | ✓ | ✓ | ✓ | x | More comprehensive and/or recent survey required                  | National capacity for stroke surveillance through registries required                     |

|                             |        |                                                                                 |   |   |   |   |   |   |                                                                                    |                                                                                           |
|-----------------------------|--------|---------------------------------------------------------------------------------|---|---|---|---|---|---|------------------------------------------------------------------------------------|-------------------------------------------------------------------------------------------|
| Equatorial Guinea           | 1.87   | DHS (2011) <sup>145</sup>                                                       | ✓ | x | x | ✓ | x | x | More comprehensive and/or recent survey required                                   | National capacity for stroke surveillance through registries required                     |
| Eritrea                     | 4.24   | STEPS (2004) <sup>114</sup>                                                     | ✓ | ✓ | x | ✓ | ✓ | x | More comprehensive and/or recent survey required                                   | National capacity for stroke surveillance through registries required                     |
| Estonia                     | 1.28   | EHIS (ETeU2019), <sup>115,146</sup><br>SHARE (Wave 8; 2019-2020) <sup>141</sup> | ✓ | x | x | ✓ | ✓ | x | Recent survey undertaken, but lacking BP and biochemical measures                  | National capacity for stroke surveillance through registries required                     |
| Eswatini                    | 1.30   | STEPS (2014) <sup>114</sup>                                                     | ✓ | ✓ | ✓ | ✓ | ✓ | x | More comprehensive and/or recent survey required                                   | National capacity for stroke surveillance through registries required                     |
| Ethiopia                    | 144.94 | DHS (2019) <sup>147</sup>                                                       | ✓ | x | x | x | x | x | Recent survey undertaken, but lacking BP measures and other important risk factors | National capacity for stroke surveillance through registries required                     |
| Falkland Islands (Malvinas) | 0.00   | NHS (2019) <sup>148</sup>                                                       | x | x | x | ✓ | ✓ | x | Recent survey undertaken, but lacking BP and biochemical measures                  | National capacity for stroke surveillance through registries required                     |
| Fiji                        | 0.97   | STEPS (2011) <sup>114</sup>                                                     | ✓ | ✓ | ✓ | ✓ | ✓ | x | More comprehensive and/or recent survey required                                   | National capacity for stroke surveillance through registries required                     |
| Finland                     | 5.55   | EHIS (2019) <sup>149</sup> & NHS (2017) <sup>150</sup>                          | ✓ | ✓ | ✓ | ✓ | ✓ | ✓ | Recent and comprehensive survey undertaken                                         | Have capacity for national stroke surveillance through registries                         |
| France                      | 68.67  | EHIS (2019) <sup>115</sup>                                                      | ✓ | x | x | ✓ | ✓ | x | Recent survey undertaken, but lacking BP and biochemical measures                  | National capacity for stroke surveillance through registries required                     |
| French Guiana               | 0.44   | -                                                                               | - | - | - | - | - | x | No information on risk factor survey found                                         | National capacity for stroke surveillance through registries required                     |
| Gabon                       | 2.74   | DHS (2012) <sup>151</sup>                                                       | ✓ | x | x | ✓ | x | x | More comprehensive and/or recent survey required                                   | National capacity for stroke surveillance through registries required                     |
| Gambia                      | 3.17   | DHS (2019-20) <sup>152</sup>                                                    | x | x | x | ✓ | ✓ | x | Recent survey undertaken, but lacking BP and biochemical measures                  | National capacity for stroke surveillance through registries required                     |
| Georgia                     | 3.58   | STEPS (2016) <sup>114</sup>                                                     | ✓ | ✓ | ✓ | ✓ | ✓ | x | More comprehensive and/or recent survey required                                   | National capacity for stroke surveillance through registries required                     |
| Germany                     | 82.21  | EHIS (2020) <sup>115</sup>                                                      | ✓ | x | x | ✓ | ✓ | ✓ | Recent survey undertaken, but lacking BP and biochemical measures                  | National capacity for stroke surveillance through registries could be expanded nationwide |
| Ghana                       | 37.83  | DHS (2014) <sup>153</sup>                                                       | ✓ | ✓ | x | ✓ | ✓ | x | More comprehensive and/or recent survey required                                   | National capacity for stroke surveillance through registries required                     |
| Greece                      | 10.20  | EHIS (2019) <sup>115,154</sup>                                                  | ✓ | x | x | ✓ | ✓ | x | Recent survey undertaken, but lacking BP and biochemical measures                  | National capacity for stroke surveillance through registries required                     |
| Grenada                     | 0.12   | STEPS (2010-2011) <sup>114</sup>                                                | ✓ | ✓ | x | ✓ | ✓ | x | More comprehensive and/or recent survey required                                   | National capacity for stroke surveillance through registries required                     |
| Guadeloupe                  | 0.40   | -                                                                               | - | - | - | - | - | x | No information on risk factor survey found                                         | National capacity for stroke surveillance through registries required                     |
| Guatemala                   | 19.88  | STEPS (2015) <sup>114</sup>                                                     | ✓ | ✓ | ✓ | ✓ | ✓ | x | More comprehensive and/or recent survey required                                   | National capacity for stroke surveillance through registries required                     |
| Guinea                      | 17.02  | DHS (2018) <sup>155</sup>                                                       | x | x | x | ✓ | ✓ | x | Recent survey undertaken, but lacking BP and biochemical measures                  | National capacity for stroke surveillance through registries required                     |
| Guinea-Bissau               | 2.46   | -                                                                               | - | - | - | - | - | x | No information on risk factor survey found                                         | National capacity for stroke surveillance through registries required                     |

|                    |         |                                                                             |   |   |   |   |   |   |                                                                   |                                                                                           |
|--------------------|---------|-----------------------------------------------------------------------------|---|---|---|---|---|---|-------------------------------------------------------------------|-------------------------------------------------------------------------------------------|
| Guyana             | 0.82    | STEPS (2016) <sup>114</sup>                                                 | ✓ | ✓ | ✓ | ✓ | ✓ | x | More comprehensive and/or recent survey required                  | National capacity for stroke surveillance through registries required                     |
| Haiti              | 12.73   | DHS (2016-2017) <sup>156</sup>                                              | ✓ | ✓ | ✓ | ✓ | ✓ | x | More comprehensive and/or recent survey required                  | National capacity for stroke surveillance through registries required                     |
| Honduras           | 11.45   | DHS (2011-2012) <sup>157</sup>                                              | ✓ | x | x | x | x | x | More comprehensive and/or recent survey required                  | National capacity for stroke surveillance through registries required                     |
| Hong Kong          | 7.86    | PHS (2020) <sup>158</sup>                                                   | ✓ | ✓ | ✓ | ✓ | ✓ | x | Recent and comprehensive survey undertaken                        | National capacity for stroke surveillance through registries required                     |
| Hungary            | 9.40    | SHARE (Wave 8; 2019-2020) <sup>159</sup> ; EHS (2019) <sup>115</sup>        | ✓ | x | x | ✓ | ✓ | ✓ | Recent survey undertaken, but lacking BP and biochemical measures | National capacity for stroke surveillance through registries could be expanded nationwide |
| Iceland            | 0.39    | EHIS (2019) <sup>115</sup>                                                  | ✓ | x | x | ✓ | ✓ | x | Recent survey undertaken, but lacking BP and biochemical measures | National capacity for stroke surveillance through registries required                     |
| India              | 1503.64 | DHS (2019-2021) <sup>160</sup>                                              | ✓ | ✓ | ✓ | ✓ | ✓ | ✓ | Recent and comprehensive survey undertaken                        | National capacity for stroke surveillance through registries could be expanded nationwide |
| Indonesia          | 299.20  | DHS (2017) <sup>161</sup>                                                   | x | x | x | ✓ | x | x | More comprehensive and/or recent survey required                  | National capacity for stroke surveillance through registries required                     |
| Iran, Islamic Rep. | 92.66   | STEPS (2016) <sup>114</sup>                                                 | ✓ | ✓ | ✓ | ✓ | ✓ | x | More comprehensive and/or recent survey required                  | National capacity for stroke surveillance through registries required                     |
| Iraq               | 50.19   | STEPS (2015) <sup>114</sup>                                                 | ✓ | ✓ | ✓ | ✓ | ✓ | x | More comprehensive and/or recent survey required                  | National capacity for stroke surveillance through registries required                     |
| Ireland            | 5.27    | Healthy Ireland Survey (2021); <sup>162</sup><br>EHIS (2019) <sup>115</sup> | ✓ | x | x | ✓ | ✓ | ✓ | Recent survey undertaken, but lacking BP and biochemical measures | National capacity for stroke surveillance through registries could be expanded nationwide |
| Israel             | 10.61   | Israel National Health Survey (INHIS; 2014) <sup>163</sup>                  | ✓ | ✓ | ✓ | ✓ | ✓ | ✓ | More comprehensive and/or recent survey required                  | Have capacity for national stroke surveillance through registries                         |
| Italy              | 57.60   | SHARE (Wave 8; 2019-2020) <sup>159</sup> ; EHS (2019) <sup>115</sup>        | ✓ | x | x | ✓ | ✓ | x | Recent survey undertaken, but lacking BP and biochemical measures | National capacity for stroke surveillance through registries required                     |
| Jamaica            | 3.05    | Jamaica Health and Lifestyle Survey (2016-2017) <sup>164</sup>              | ✓ | ✓ | ✓ | ✓ | ✓ | x | More comprehensive and/or recent survey required                  | National capacity for stroke surveillance through registries required                     |
| Japan              | 119.58  | NHNS (2019) <sup>165</sup>                                                  | ✓ | ✓ | ✓ | ✓ | ✓ | ✓ | Recent and comprehensive survey undertaken                        | National capacity for stroke surveillance through registries could be expanded nationwide |
| Jordan             | 10.65   | STEPS (2019) <sup>114</sup>                                                 | ✓ | ✓ | ✓ | ✓ | ✓ | x | Recent and comprehensive survey undertaken                        | National capacity for stroke surveillance through registries required                     |
| Kazakhstan         | 20.66   | Aktobe Oblast STEPS (2016) <sup>166</sup>                                   | ✓ | ✓ | ✓ | ✓ | ✓ | x | More comprehensive and/or recent survey required                  | National capacity for stroke surveillance through registries required                     |
| Kenya              | 66.45   | STEPS (2015) <sup>114</sup>                                                 | ✓ | ✓ | ✓ | ✓ | ✓ | x | More comprehensive and/or recent survey required                  | National capacity for stroke surveillance through registries required                     |
| Kiribati           | 0.14    | STEPS (2015-2016) <sup>114</sup>                                            | ✓ | ✓ | ✓ | ✓ | ✓ | x | More comprehensive and/or recent survey required                  | National capacity for stroke surveillance through registries required                     |
| Korea, Rep.        | 51.44   | Korea National Health and Nutrition Survey (KNHANES; 2019) <sup>167</sup>   | ✓ | ✓ | x | ✓ | x | ✓ | Recent survey undertaken, but lacking biochemical measures        | National capacity for stroke surveillance through registries could be expanded nationwide |

|                                  |       |                                                                  |   |   |   |   |   |   |                                                                   |                                                                                           |
|----------------------------------|-------|------------------------------------------------------------------|---|---|---|---|---|---|-------------------------------------------------------------------|-------------------------------------------------------------------------------------------|
| Kuwait                           | 4.75  | STEPS (2014) <sup>114</sup>                                      | ✓ | ✓ | ✓ | ✓ | ✓ | x | More comprehensive and/or recent survey required                  | National capacity for stroke surveillance through registries required                     |
| Kyrgyz Republic                  | 7.53  | STEPS (2013) <sup>114</sup>                                      | ✓ | ✓ | ✓ | ✓ | ✓ | x | More comprehensive and/or recent survey required                  | National capacity for stroke surveillance through registries required                     |
| Lao People's Democratic Republic | 8.23  | DHS (2017) <sup>168</sup>                                        | x | x | x | ✓ | x | x | More comprehensive and/or recent survey required                  | National capacity for stroke surveillance through registries required                     |
| Latvia                           | 1.74  | EHIS (2019) <sup>115</sup>                                       | ✓ | x | x | ✓ | ✓ | x | Recent survey undertaken, but lacking BP and biochemical measures | National capacity for stroke surveillance through registries required                     |
| Lebanon                          | 6.20  | STEPS (2016-2017) <sup>114</sup>                                 | ✓ | ✓ | ✓ | ✓ | ✓ | x | More comprehensive and/or recent survey required                  | National capacity for stroke surveillance through registries required                     |
| Lesotho                          | 2.33  | DHS (2014) <sup>169</sup>                                        | ✓ | ✓ | x | ✓ | ✓ | x | More comprehensive and/or recent survey required                  | National capacity for stroke surveillance through registries required                     |
| Liberia                          | 6.37  | DHS (2019-20) <sup>170</sup>                                     | x | x | x | ✓ | x | x | Recent survey undertaken, but lacking BP and biochemical measures | National capacity for stroke surveillance through registries required                     |
| Libyan Arab Jamahiriya           | 7.61  | STEPS (2009) <sup>114</sup>                                      | ✓ | ✓ | ✓ | ✓ | ✓ | x | More comprehensive and/or recent survey required                  | National capacity for stroke surveillance through registries required                     |
| Lithuania                        | 2.60  | EHIS (2019) <sup>127</sup>                                       | ✓ | x | x | ✓ | ✓ | x | Recent survey undertaken, but lacking BP and biochemical measures | National capacity for stroke surveillance through registries required                     |
| Luxembourg                       | 0.69  | EHIS (2019) <sup>127</sup>                                       | ✓ | x | x | ✓ | ✓ | x | Recent survey undertaken, but lacking BP and biochemical measures | National capacity for stroke surveillance through registries required                     |
| Macau                            | 0.73  | -                                                                | - | - | - | - | - | x | No information on risk factor survey found                        | National capacity for stroke surveillance through registries required                     |
| Madagascar                       | 35.62 | DHS (2021) <sup>171</sup>                                        | ✓ | x | x | ✓ | ✓ | x | Recent survey undertaken, but lacking BP and biochemical measures | National capacity for stroke surveillance through registries required                     |
| Malawi                           | 24.85 | STEPS (2017) <sup>114</sup>                                      | ✓ | ✓ | ✓ | ✓ | ✓ | x | More comprehensive and/or recent survey required                  | National capacity for stroke surveillance through registries required                     |
| Malaysia                         | 36.10 | National Health and Morbidity Survey (NHMS; 2020) <sup>172</sup> | ✓ | ✓ | ✓ | ✓ | ✓ | ✓ | Recent and comprehensive survey undertaken                        | National capacity for stroke surveillance through registries could be expanded nationwide |
| Maldives                         | 0.52  | DHS (2016-2017) <sup>173</sup>                                   | ✓ | x | x | ✓ | ✓ | x | More comprehensive and/or recent survey required                  | National capacity for stroke surveillance through registries required                     |
| Mali                             | 26.96 | DHS (2018) <sup>174</sup>                                        | x | x | x | ✓ | ✓ | x | Recent survey undertaken, but lacking BP and biochemical measures | National capacity for stroke surveillance through registries required                     |
| Malta                            | 0.52  | EHIS (2020) <sup>127</sup>                                       | ✓ | x | x | ✓ | ✓ | x | Recent survey undertaken, but lacking BP and biochemical measures | National capacity for stroke surveillance through registries required                     |
| Marshall Islands                 | 0.06  | STEPS (2017-2018) <sup>114</sup>                                 | ✓ | ✓ | ✓ | ✓ | ✓ | x | Recent and comprehensive survey undertaken                        | National capacity for stroke surveillance through registries required                     |
| Martinique                       | 0.367 | -                                                                | - | - | - | - | - | x | No information on risk factor survey found                        | National capacity for stroke surveillance through registries required                     |
| Mauritania                       | 5.97  | DHS (2021) <sup>175</sup>                                        | x | x | x | ✓ | ✓ | x | Recent survey undertaken, but lacking BP and biochemical measures | National capacity for stroke surveillance through registries required                     |
| Mauritius                        | 1.27  | DHS (2015) <sup>176</sup>                                        | ✓ | ✓ | ✓ | ✓ | ✓ | x | More comprehensive and/or recent survey required                  | National capacity for stroke surveillance through registries required                     |
| Mayotte                          | 0.343 | -                                                                | - | - | - | - | - | x | No information on risk factor survey found                        | National capacity for stroke surveillance through registries required                     |

|                                  |        |                                                             |   |   |   |   |   |   |                                                                   |                                                                                           |
|----------------------------------|--------|-------------------------------------------------------------|---|---|---|---|---|---|-------------------------------------------------------------------|-------------------------------------------------------------------------------------------|
| Mexico                           | 140.88 | ENSANUT-MC (2016) <sup>177</sup>                            | ✓ | ✓ | ✓ | ✓ | ✓ | ✓ | More comprehensive and/or recent survey required                  | National capacity for stroke surveillance through registries could be expanded nationwide |
| Micronesia (Federated States of) | 0.13   | STEPS (2016) <sup>114</sup>                                 | ✓ | ✓ | ✓ | ✓ | ✓ | x | More comprehensive and/or recent survey required                  | National capacity for stroke surveillance through registries required                     |
| Moldova                          | 2.48   | STEPS (2013) <sup>114</sup>                                 | ✓ | ✓ | ✓ | ✓ | ✓ | x | More comprehensive and/or recent survey required                  | National capacity for stroke surveillance through registries required                     |
| Monaco                           | 0.04   | -                                                           | - | - | - | - | - | x | No information on risk factor survey found                        | National capacity for stroke surveillance through registries required                     |
| Mongolia                         | 3.72   | STEPS (2019) <sup>114</sup>                                 | ✓ | ✓ | ✓ | ✓ | ✓ | x | Recent and comprehensive survey undertaken                        | National capacity for stroke surveillance through registries required                     |
| Montserrat                       | 0.005  | -                                                           | - | - | - | - | - | x | No information on risk factor survey found                        | National capacity for stroke surveillance through registries required                     |
| Morocco                          | 40.89  | STEPS (2017-2018) <sup>114</sup>                            | ✓ | ✓ | ✓ | ✓ | ✓ | x | Recent and comprehensive survey undertaken                        | National capacity for stroke surveillance through registries required                     |
| Mozambique                       | 41.19  | STEPS (2014-2015) <sup>114</sup>                            | ✓ | ✓ | ✓ | ✓ | ✓ | x | More comprehensive and/or recent survey required                  | National capacity for stroke surveillance through registries required                     |
| Myanmar                          | 58.48  | DHS (2015-2016) <sup>178</sup>                              | x | x | x | ✓ | x | x | More comprehensive and/or recent survey required                  | National capacity for stroke surveillance through registries required                     |
| Namibia                          | 3.01   | DHS (2013) <sup>179</sup>                                   | ✓ | ✓ | ✓ | ✓ | ✓ | x | More comprehensive and/or recent survey required                  | National capacity for stroke surveillance through registries required                     |
| Nauru                            | 0.01   | STEPS (2004) <sup>114</sup>                                 | ✓ | ✓ | ✓ | ✓ | ✓ | x | More comprehensive and/or recent survey required                  | National capacity for stroke surveillance through registries required                     |
| Nepal                            | 33.39  | STEPS (2019) <sup>114</sup>                                 | ✓ | ✓ | ✓ | ✓ | ✓ | x | Recent and comprehensive survey undertaken                        | National capacity for stroke surveillance through registries required                     |
| Netherlands                      | 17.76  | EHIS (2019) <sup>127</sup>                                  | ✓ | x | x | ✓ | ✓ | ✓ | Recent survey undertaken, but lacking BP and biochemical measures | National capacity for stroke surveillance through registries could be expanded nationwide |
| New Zealand                      | 5.43   | New Zealand Health Survey (NZHS; 2020-2021) <sup>180</sup>  | ✓ | ✓ | ✓ | ✓ | ✓ | x | Recent and comprehensive survey undertaken                        | National capacity for stroke surveillance through registries required                     |
| Nicaragua                        | 7.39   | CAMDI (2011) <sup>139</sup>                                 | ✓ | ✓ | ✓ | ✓ | ✓ | x | More comprehensive and/or recent survey required                  | National capacity for stroke surveillance through registries required                     |
| Niger                            | 34.85  | STEPS (2021) <sup>114</sup>                                 | ✓ | ✓ | ✓ | ✓ | ✓ | x | Recent and comprehensive survey undertaken                        | National capacity for stroke surveillance through registries required                     |
| Nigeria                          | 262.98 | DHS (2018) <sup>181</sup>                                   | ✓ | x | x | ✓ | x | x | Recent survey undertaken, but lacking BP and biochemical measures | National capacity for stroke surveillance through registries required                     |
| Niue                             | 0.00   | STEPS (2011) <sup>114</sup>                                 | ✓ | ✓ | ✓ | ✓ | ✓ | x | More comprehensive and/or recent survey required                  | National capacity for stroke surveillance through registries required                     |
| North Macedonia                  | 2.03   | National Nutrition Survey (2011) <sup>182</sup>             | ✓ | x | x | x | x | x | More comprehensive and/or recent survey required                  | National capacity for stroke surveillance through registries required                     |
| Norway                           | 5.80   | Survey of Living Conditions on Health (2019) <sup>183</sup> | ✓ | x | x | ✓ | ✓ | ✓ | Recent survey undertaken, but lacking BP and biochemical measures | National capacity for stroke surveillance through registries could be expanded nationwide |
| Occupied Palestinian Territory   | 6.74   | STEPS (2010-2011) <sup>114</sup>                            | ✓ | ✓ | ✓ | ✓ | ✓ | x | More comprehensive and/or recent survey required                  | National capacity for stroke surveillance through registries required                     |

|                           |        |                                                                              |   |   |   |   |   |   |                                                                   |                                                                                           |
|---------------------------|--------|------------------------------------------------------------------------------|---|---|---|---|---|---|-------------------------------------------------------------------|-------------------------------------------------------------------------------------------|
| Oman                      | 5.94   | STEPS (2017) <sup>114</sup>                                                  | ✓ | ✓ | ✓ | ✓ | ✓ | x | More comprehensive and/or recent survey required                  | National capacity for stroke surveillance through registries required                     |
| Pakistan                  | 262.96 | DHS (2017-2018) <sup>184</sup>                                               | ✓ | x | x | x | x | x | Recent survey undertaken, but lacking BP and biochemical measures | National capacity for stroke surveillance through registries required                     |
| Palau                     | 0.02   | STEPS (2016) <sup>114</sup>                                                  | ✓ | ✓ | ✓ | ✓ | ✓ | x | More comprehensive and/or recent survey required                  | National capacity for stroke surveillance through registries required                     |
| Panama                    | 4.93   | Panama Living Standard Measurement Survey (PLSMS; 2003) <sup>185</sup>       | ✓ | x | x | x | x | x | More comprehensive and/or recent survey required                  | National capacity for stroke surveillance through registries required                     |
| Papua New Guinea          | 10.71  | DHS (2016-2018) <sup>186</sup>                                               | ✓ | x | x | ✓ | x | x | Recent survey undertaken, but lacking BP and biochemical measures | National capacity for stroke surveillance through registries required                     |
| Paraguay                  | 7.95   | STEPS (2011) <sup>114</sup>                                                  | ✓ | x | x | x | x | x | More comprehensive and/or recent survey required                  | National capacity for stroke surveillance through registries required                     |
| Peru                      | 36.03  | DHS (2020) <sup>187</sup>                                                    | ✓ | ✓ | x | ✓ | ✓ | x | Recent survey undertaken, but lacking biochemical measures        | National capacity for stroke surveillance through registries required                     |
| Philippines               | 123.70 | DHS (2017) <sup>188</sup>                                                    | x | x | x | x | ✓ | x | More comprehensive and/or recent survey required                  | National capacity for stroke surveillance through registries required                     |
| Poland                    | 36.87  | EHIS (2019) <sup>115</sup>                                                   | ✓ | x | x | ✓ | ✓ | ✓ | Recent survey undertaken, but lacking BP and biochemical measures | National capacity for stroke surveillance through registries could be expanded nationwide |
| Portugal                  | 10.01  | EHIS (2019) <sup>115</sup>                                                   | ✓ | x | x | ✓ | ✓ | x | Recent survey undertaken, but lacking BP and biochemical measures | National capacity for stroke surveillance through registries required                     |
| Puerto Rico               | 3.30   | The Behavioural Risk Factor Surveillance System (BRFSS; 2022) <sup>189</sup> | x | x | x | ✓ | ✓ | x | Recent survey undertaken, but lacking BP and biochemical measures | National capacity for stroke surveillance through registries required                     |
| Qatar                     | 3.33   | STEPS (2012) <sup>114</sup>                                                  | ✓ | ✓ | ✓ | ✓ | ✓ | x | More comprehensive and/or recent survey required                  | National capacity for stroke surveillance through registries required                     |
| Reunion                   | -      | -                                                                            | - | - | - | - | - | x | No information on risk factor survey found                        | National capacity for stroke surveillance through registries required                     |
| Rodrigues                 | -      | -                                                                            | - | - | - | - | - | x | No information on risk factor survey found                        | National capacity for stroke surveillance through registries required                     |
| Romania                   | 18.31  | EHIS (2019) <sup>115</sup>                                                   | ✓ | x | x | ✓ | ✓ | x | Recent survey undertaken, but lacking BP and biochemical measures | National capacity for stroke surveillance through registries required                     |
| Russian Federation        | 140.86 | Russia Longitudinal Monitoring Survey (RLMS-HSE; 2020) <sup>190</sup>        | ✓ | x | x | ✓ | ✓ | ✓ | Recent survey undertaken, but lacking BP and biochemical measures | Have capacity for national stroke surveillance through registries                         |
| Rwanda                    | 16.23  | DHS (2019-20) <sup>191</sup>                                                 | x | x | x | ✓ | x | x | Recent survey undertaken, but lacking BP and biochemical measures | National capacity for stroke surveillance through registries required                     |
| Ryu Kyu Islands           | -      | -                                                                            | - | - | - | - | - | x | No information on risk factor survey found                        | National capacity for stroke surveillance through registries required                     |
| Saint Kitts and Nevis     | 0.06   | STEPS (2007) <sup>114</sup>                                                  | ✓ | ✓ | ✓ | ✓ | ✓ | x | More comprehensive and/or recent survey required                  | National capacity for stroke surveillance through registries required                     |
| Saint Lucia               | 0.19   | STEPS (2012) <sup>114</sup>                                                  | ✓ | ✓ | ✓ | ✓ | ✓ | x | More comprehensive and/or recent survey required                  | National capacity for stroke surveillance through registries required                     |
| Saint Pierre and Miquelon | 0.005  | -                                                                            | - | - | - | - | - | x | No information on risk factor survey found                        | National capacity for stroke surveillance through registries required                     |

|                              |       |                                                                                       |   |   |   |   |   |   |                                                                                       |                                                                                           |
|------------------------------|-------|---------------------------------------------------------------------------------------|---|---|---|---|---|---|---------------------------------------------------------------------------------------|-------------------------------------------------------------------------------------------|
| Saint Vincent and Grenadines | 0.11  | STEPS (2013-2014) <sup>114</sup>                                                      | ✓ | ✓ | ✓ | ✓ | ✓ | x | More comprehensive and/or recent survey required                                      | National capacity for stroke surveillance through registries required                     |
| Samoa                        | 0.22  | STEPS (2013) <sup>114</sup>                                                           | ✓ | ✓ | ✓ | ✓ | ✓ | x | More comprehensive and/or recent survey required                                      | National capacity for stroke surveillance through registries required                     |
| San Marino                   | 0.03  |                                                                                       | - | - | - | - | - | x | No information on risk factor survey found                                            | National capacity for stroke surveillance through registries required                     |
| Sao Tome and Principe        | 0.27  | DHS (2008-2009) <sup>192</sup>                                                        | x | x | x | ✓ | x | x | More comprehensive and/or recent survey required                                      | National capacity for stroke surveillance through registries required                     |
| Saudi Arabia                 | 39.32 | NHS (2019) <sup>193</sup>                                                             | ✓ | ✓ | ✓ | ✓ | ✓ | x | Recent and comprehensive survey undertaken                                            | National capacity for stroke surveillance through registries required                     |
| Senegal                      | 21.55 | DHS (2019) <sup>194</sup>                                                             | x | x | x | x | x | x | Recent survey undertaken, but lacking measurements of BP other important risk factors | National capacity for stroke surveillance through registries required                     |
| Serbia                       | 6.47  | Serbian National Health Survey (SNHS; 2019); <sup>195</sup> EHS (2019) <sup>115</sup> | ✓ | ✓ | x | ✓ | ✓ | x | Recent survey undertaken, but lacking biochemical measures                            | National capacity for stroke surveillance through registries required                     |
| Seychelles                   | 0.10  | STEPS (2013) <sup>114</sup>                                                           | ✓ | ✓ | ✓ | ✓ | ✓ | x | More comprehensive and/or recent survey required                                      | National capacity for stroke surveillance through registries required                     |
| Sierra Leone                 | 9.65  | DHS (2019) <sup>196</sup>                                                             | ✓ | x | x | ✓ | x | x | Recent survey undertaken, but lacking BP and biochemical measures                     | National capacity for stroke surveillance through registries required                     |
| Singapore                    | 5.80  | National Population Health Survey (NPHS; 2019-2020) <sup>197</sup>                    | ✓ | ✓ | ✓ | ✓ | ✓ | ✓ | Recent and comprehensive survey undertaken                                            | Have capacity for national stroke surveillance through registries                         |
| Slovak Republic              | 5.38  | EHIS (2019) <sup>115</sup>                                                            | ✓ | x | x | ✓ | ✓ | x | Recent survey undertaken, but lacking BP and biochemical measures                     | National capacity for stroke surveillance through registries required                     |
| Slovenia                     | 2.08  | EHIS (2019) <sup>115</sup>                                                            | ✓ | x | x | ✓ | ✓ | x | Recent survey undertaken, but lacking BP and biochemical measures                     | National capacity for stroke surveillance through registries required                     |
| Solomon Islands              | 0.87  | STEPS (2006) <sup>114</sup>                                                           | ✓ | ✓ | ✓ | ✓ | ✓ | x | More comprehensive and/or recent survey required                                      | National capacity for stroke surveillance through registries required                     |
| Somalia                      | 21.19 | -                                                                                     | - | - | - | - | - | x |                                                                                       |                                                                                           |
| South Africa                 | 65.96 | DHS (2016) <sup>198</sup>                                                             | ✓ | ✓ | ✓ | ✓ | ✓ | x | More comprehensive and/or recent survey required                                      | National capacity for stroke surveillance through registries required                     |
| Spain                        | 46.65 | EHIS (2019) <sup>115</sup>                                                            | ✓ | x | x | ✓ | ✓ | ✓ | Recent survey undertaken, but lacking BP and biochemical measures                     | National capacity for stroke surveillance through registries could be expanded nationwide |
| Sri Lanka                    | 22.69 | DHS (2016) <sup>199</sup>                                                             | ✓ | x | x | ✓ | ✓ | x | More comprehensive and/or recent survey required                                      | National capacity for stroke surveillance through registries required                     |
| Sudan                        | 55.25 | STEPS (2016) <sup>114</sup>                                                           | ✓ | ✓ | ✓ | ✓ | ✓ | x | More comprehensive and/or recent survey required                                      | National capacity for stroke surveillance through registries required                     |
| Suriname                     | 0.63  | STEPS (2013) <sup>114</sup>                                                           | ✓ | ✓ | ✓ | ✓ | ✓ | x | More comprehensive and/or recent survey required                                      | National capacity for stroke surveillance through registries required                     |
| Sweden                       | 10.85 | National Population Health Survey (NPHS; 2021); EHS (2019) <sup>115</sup>             | ✓ | x | x | ✓ | ✓ | ✓ | Recent survey undertaken, but lacking BP and biochemical measures                     | National capacity for stroke surveillance through registries could be expanded nationwide |

|                                   |        |                                                                     |   |   |   |   |   |   |                                                                   |                                                                                           |
|-----------------------------------|--------|---------------------------------------------------------------------|---|---|---|---|---|---|-------------------------------------------------------------------|-------------------------------------------------------------------------------------------|
| Switzerland                       | 9.14   | SHARE (Wave 8; 2019-2020); <sup>141</sup> NHS (2017) <sup>200</sup> | ✓ | x | x | ✓ | ✓ | ✓ | Recent survey undertaken, but lacking BP and biochemical measures | National capacity for stroke surveillance through registries could be expanded nationwide |
| Syrian Arab Republic              | 26.68  | STEPS (2013) <sup>114</sup>                                         | ✓ | ✓ | ✓ | ✓ | ✓ | x | More comprehensive and/or recent survey required                  | National capacity for stroke surveillance through registries required                     |
| Taiwan                            | 24.01  | Nutrition and Health Survey in Taiwan (NAHSIT; 2017) <sup>201</sup> | ✓ | ✓ | ✓ | ✓ | ✓ | ✓ | More comprehensive and/or recent survey required                  | National capacity for stroke surveillance through registries could be expanded nationwide |
| Tajikistan                        | 11.56  | DHS (2017) <sup>202</sup>                                           | x | ✓ | x | ✓ | ✓ | x | More comprehensive and/or recent survey required                  | National capacity for stroke surveillance through registries required                     |
| Thailand                          | 70.35  | National Health Examination Survey (NHES V; 2014) <sup>203</sup>    | ✓ | ✓ | ✓ | ✓ | ✓ | ✓ | More comprehensive and/or recent survey required                  | National capacity for stroke surveillance through registries could be expanded nationwide |
| Togo                              | 10.42  | DHS (2013-14) <sup>204</sup>                                        | x | x | x | ✓ | x | x | More comprehensive and/or recent survey required                  | National capacity for stroke surveillance through registries required                     |
| Tonga                             | 0.12   | STEPS (2012) <sup>114</sup>                                         | ✓ | ✓ | ✓ | ✓ | ✓ | x | More comprehensive and/or recent survey required                  | National capacity for stroke surveillance through registries required                     |
| Trinidad and Tobago               | 1.41   | STEPS (2011) <sup>114</sup>                                         | ✓ | ✓ | ✓ | ✓ | ✓ | x | More comprehensive and/or recent survey required                  | National capacity for stroke surveillance through registries required                     |
| Tunisia                           | 12.76  | DHS (1988) <sup>205</sup>                                           | x | x | x | x | x | x | More comprehensive and/or recent survey required                  | National capacity for stroke surveillance through registries required                     |
| Turkey                            | 89.16  | EHIS (2019) <sup>115</sup>                                          | ✓ | x | x | ✓ | ✓ | x | Recent survey undertaken, but lacking BP and biochemical measures | National capacity for stroke surveillance through registries required                     |
| Turkmenistan                      | 6.78   | STEPS (2018) <sup>114</sup>                                         | ✓ | ✓ | ✓ | ✓ | ✓ | x | Recent and comprehensive survey undertaken                        | National capacity for stroke surveillance through registries required                     |
| Turks and Caicos Islands          | 0.04   | -                                                                   | - | - | - | - | - | x | No information on risk factor survey found                        | National capacity for stroke surveillance through registries required                     |
| Tuvalu                            | 0.01   | STEPS (2015) <sup>114</sup>                                         | ✓ | ✓ | ✓ | ✓ | ✓ | x | More comprehensive and/or recent survey required                  | National capacity for stroke surveillance through registries required                     |
| USA                               | 348.08 | National Health Interview Survey (NHIS; 2021) <sup>206</sup>        | ✓ | ✓ | ✓ | ✓ | ✓ | ✓ | Recent and comprehensive survey undertaken                        | National capacity for stroke surveillance through registries could be expanded nationwide |
| Uganda                            | 59.44  | DHS (2016) <sup>206</sup>                                           | ✓ | x | x | x | x | x | More comprehensive and/or recent survey required                  | National capacity for stroke surveillance through registries required                     |
| Ukraine                           | 41.19  | STEPS (2019) <sup>114</sup>                                         | ✓ | ✓ | ✓ | ✓ | ✓ | x | Recent and comprehensive survey undertaken                        | National capacity for stroke surveillance through registries required                     |
| United Arab Emirates              | 10.66  | STEPS (2017-2018) <sup>114</sup>                                    | ✓ | ✓ | ✓ | ✓ | ✓ | x | Recent and comprehensive survey undertaken                        | National capacity for stroke surveillance through registries required                     |
| United Kingdom, England and Wales | 61.80  | Health Survey for England (HSE; 2021) <sup>207</sup>                | ✓ | ✓ | ✓ | ✓ | ✓ | ✓ | Recent and comprehensive survey undertaken                        | National capacity for stroke surveillance through registries could be expanded nationwide |
| United Kingdom, Northern Ireland  | 5.50   | NHS (2020/21) <sup>208</sup>                                        | x | x | x | ✓ | x | ✓ | Recent survey undertaken, but lacking BP and biochemical measures | National capacity for stroke surveillance through registries could be expanded nationwide |



|                             |        |                                                   |   |   |   |   |   |   |                                                                   |                                                                                           |
|-----------------------------|--------|---------------------------------------------------|---|---|---|---|---|---|-------------------------------------------------------------------|-------------------------------------------------------------------------------------------|
| United Kingdom, Scotland    | 1.90   | The Scottish Health Survey (2020) <sup>209</sup>  | x | x | x | ✓ | ✓ | ✓ | Recent survey undertaken, but lacking BP and biochemical measures | National capacity for stroke surveillance through registries could be expanded nationwide |
| United Republic of Tanzania | 79.16  | STEPS (2012) <sup>114</sup>                       | ✓ | ✓ | ✓ | ✓ | ✓ | x | More comprehensive and/or recent survey required                  | National capacity for stroke surveillance through registries required                     |
| Uruguay                     | 3.57   | Continuous Household Survey (2016) <sup>210</sup> | x | x | x | ✓ | x | x | More comprehensive and/or recent survey required                  | National capacity for stroke surveillance through registries required                     |
| Uzbekistan                  | 38.51  | STEPS (2014) <sup>114</sup>                       | ✓ | ✓ | ✓ | ✓ | ✓ | x | More comprehensive and/or recent survey required                  | National capacity for stroke surveillance through registries required                     |
| Vanuatu                     | 0.38   | STEPS (2011) <sup>114</sup>                       | ✓ | ✓ | ✓ | ✓ | ✓ | x | More comprehensive and/or recent survey required                  | National capacity for stroke surveillance through registries required                     |
| Venezuela                   | 33.63  | -                                                 | - | - | - | - | - | X | No information on risk factor survey found                        | National capacity for stroke surveillance through registries required                     |
| Vietnam                     | 104.16 | STEPS (2015) <sup>114</sup>                       | ✓ | ✓ | ✓ | ✓ | ✓ | x | More comprehensive and/or recent survey required                  | National capacity for stroke surveillance through registries required                     |
| Virgin Islands (USA)        | 0.10   | BRFSS (2021) <sup>189</sup>                       | x | x | x | ✓ | ✓ | x | Recent survey undertaken, but lacking BP and biochemical measures | National capacity for stroke surveillance through registries required                     |
| Yemen                       | 36.41  | DHS (2013) <sup>211</sup>                         | x | x | x | ✓ | ✓ | x | More comprehensive and/or recent survey required                  | National capacity for stroke surveillance through registries required                     |
| Zambia                      | 24.33  | DHS (2018) <sup>212</sup>                         | ✓ | x | x | ✓ | ✓ | x | Recent survey undertaken, but lacking BP and biochemical measures | National capacity for stroke surveillance through registries required                     |
| Zimbabwe                    | 17.60  | DHS (2015) <sup>213</sup>                         | ✓ | x | x | ✓ | x | x | More comprehensive and/or recent survey required                  | National capacity for stroke surveillance through registries required                     |

CAMDI, The Central American Diabetes Initiative; Nat Stroke Registry, National Stroke Registry; EHIS, European Health Interview Survey; EHES, European Health Examination Survey; DHS, Demographic Health Surveys; SHARE, Survey of Health, Ageing and Retirement in Europe; NHS, National Health Survey

<sup>a</sup> Projected population (per million) in the year 2030; <sup>b</sup> Some countries may have more recent surveys that are not listed in these online sources; <sup>c</sup> Data on the presence of national stroke registries were obtained from online resources; <sup>d</sup> Estimated unmet needs are based on the information obtained from online resources.

**Supplementary Table 7: Thematic analysis of surveillance services - summary of barriers and facilitators to high performing stroke surveillance systems**

|                                | <b>Barriers</b>                                                                                                                                                                                                                                                                                                                                                                                  | <b>Facilitators</b>                                                                                                                                                                                                                                                                                                                                                               | <b>Recommendations</b>                                                                                                                                                                                                                                                                             |
|--------------------------------|--------------------------------------------------------------------------------------------------------------------------------------------------------------------------------------------------------------------------------------------------------------------------------------------------------------------------------------------------------------------------------------------------|-----------------------------------------------------------------------------------------------------------------------------------------------------------------------------------------------------------------------------------------------------------------------------------------------------------------------------------------------------------------------------------|----------------------------------------------------------------------------------------------------------------------------------------------------------------------------------------------------------------------------------------------------------------------------------------------------|
| <b>Service provision</b>       | <p>Concerns about accuracy of data on surveillance of stroke and risk factors</p> <p>Lack of detail or coverage on surveillance of stroke and risk factors</p> <p>Information restricted to individual or a small number of hospitals not representative of country</p> <p>No funding of collection or analysis of data</p> <p>Lack of regular data collection on stroke or its risk factors</p> | <p>Inclusion of health conditions (e.g., stroke) or health behaviours in regular national census collections</p> <p>Government responsibility for regular collection of data on stroke with input from experts</p> <p>National databases covering stroke care and outcomes</p> <p>Valid and reliable data on stroke and its risk factors collected by trained data collectors</p> | <p>Governments should be lobbied to include health conditions and/or behaviours in census</p> <p>National stroke plans should include action on surveillance of stroke and risk factors</p> <p>Methods and training to ensure precision of data on stroke and risk factors should be developed</p> |
| <b>Workforce</b>               | <p>Lack of incentive for health professionals or support staff to collect data on stroke</p> <p>Limited training opportunities to build capacity in collection of data on stroke</p> <p>No dedicated funding for staff to collect or analyse data on stroke</p>                                                                                                                                  | <p>Staff are motivated and have capacity to collect data on stroke and/or risk factors</p> <p>Government has invested in training of people to collect data on stroke and/or risk factors</p> <p>Staff have expertise to undertake research using data on stroke and/or risk factors</p>                                                                                          | <p>Identify sustainable sources of funding for collection of data on stroke and/or risk factors</p> <p>Create training opportunities leveraging existing resources to build capacity in collection of high-quality data on stroke and/or risk factors</p>                                          |
| <b>Information system</b>      | <p>Data collected on stroke and/or risk factors are not used for decision making within health systems or governments</p> <p>Limited capacity for data linkage using multiple sources of electronic information on stroke</p> <p>Data only collected on limited aspects of acute care and short-term outcomes</p>                                                                                | <p>Wide range of data are collected in electronic formats that can be used for several purposes at a national level</p> <p>Systems and governance are in place for data linkage</p> <p>Web-based platforms are used to collect data on stroke and/or risk factors</p>                                                                                                             | <p>Build capacity and funding for electronic medical records systems</p> <p>Develop strategies and governance for national data linkage systems</p>                                                                                                                                                |
| <b>Technology and supplies</b> | <p>Investment in technology for data collection/analysis not a priority for government/health services</p> <p>No national strategy for electronic data collection on stroke and/or risk factors</p>                                                                                                                                                                                              | <p>Investment in IT systems to support electronic data collections including in health systems</p> <p>Web-based platforms for data collection on stroke are used within and across health systems</p>                                                                                                                                                                             | <p>Promotion of existing web-based platforms for collection of data on stroke and/or risk factors</p>                                                                                                                                                                                              |
| <b>Finance</b>                 | <p>Funding of data collection on stroke and/or risk factors not a priority for governments</p> <p>Political instability affects funding across entire countries</p>                                                                                                                                                                                                                              | <p>Stroke organizations including health professionals and experts can support funding requests</p> <p>Governments (federal/state/regional) fund collection of data on stroke and its risk factors</p>                                                                                                                                                                            | <p>National stroke organizations should demonstrate how data on stroke can be used to improve prevention, care and outcomes</p>                                                                                                                                                                    |

|                   |                                                                                                                                                           |                                                                                                                                                                                                                                               |                                                                            |
|-------------------|-----------------------------------------------------------------------------------------------------------------------------------------------------------|-----------------------------------------------------------------------------------------------------------------------------------------------------------------------------------------------------------------------------------------------|----------------------------------------------------------------------------|
| <b>Governance</b> | No national plan for stroke surveillance including risk factors, care and outcomes<br>Data that are available are not used nationally for decision making | National plans for stroke articulate stroke surveillance activities<br>Adequate national funding allows good coverage of data and reporting<br>Clear research ethics and governance procedures for collection, analysis and reporting of data | National stroke plans should include stroke surveillance as a key function |
|-------------------|-----------------------------------------------------------------------------------------------------------------------------------------------------------|-----------------------------------------------------------------------------------------------------------------------------------------------------------------------------------------------------------------------------------------------|----------------------------------------------------------------------------|

**Supplementary Table 8: Key recommendations for improving stroke surveillance**

| <b>Key recommendations</b>                                                          | <b>Source</b>                                                                                                 | <b>Resources required</b>                                                                                         | <b>implications /Barriers/Facilitators, for LMICs</b>                                                                                                                                                                                                                                                                                                                                                                                                        | <b>Recommendation for contextualization and implementation through implementation ecosystem on Stroke</b>                                                                                                                                                                                                                                                                                                                                        |
|-------------------------------------------------------------------------------------|---------------------------------------------------------------------------------------------------------------|-------------------------------------------------------------------------------------------------------------------|--------------------------------------------------------------------------------------------------------------------------------------------------------------------------------------------------------------------------------------------------------------------------------------------------------------------------------------------------------------------------------------------------------------------------------------------------------------|--------------------------------------------------------------------------------------------------------------------------------------------------------------------------------------------------------------------------------------------------------------------------------------------------------------------------------------------------------------------------------------------------------------------------------------------------|
| Countries should have a nationwide and representative system for monitoring stroke. | WHO – Global Action Plan on Epilepsy and other Neurological Disorders, target 4.1                             | Expertise in epidemiology, data management and statistics to support ongoing monitoring of stroke. <sup>214</sup> | Major barriers include lack of:<br>(i) infrastructure to support a monitoring program<br>(ii) expertise to develop an efficient program<br>(iii) capacity to analyse the data collected and produce quality statistics<br>(iv) community engagement and feedback of data to enhance demand and accountability; and<br>(v) use of data to drive decision-making.<br>(vi) need for standardized and validated indicators of stroke burden from linked datasets | WSO Implementation Ecosystem on stroke to develop, implement and monitor strategic action plan with all stakeholders to ensure availability of a high-quality monitoring of stroke in their countries and regions. This should include a stepped approach that highlights the elements required for minimum (hospitalized events), essential and advanced monitoring, i.e. incorporating the <a href="#">WHO stepwise approach</a> , or similar. |
| Countries should have a nationwide monitoring program of risk factors for stroke.   | WHO - Global Action Plan on Epilepsy and other Neurological Disorders, strategic objective 3, proposed action | Expertise in epidemiology, data management and statistics to support a regular cycle of national                  | Major barriers include lack of:<br>a) Infrastructure to support a surveillance program.<br>b) expertise to develop an efficient program<br>c) capacity to analyse the data collected and produce quality statistics.<br>d) community engagement and feedback of data to enhance demand and accountability; and                                                                                                                                               | WSO implementation ecosystem on Stroke commissioners to develop, implement and monitor strategic action plan with all stakeholders to ensure availability of a high-quality surveillance system in their countries and regions. This should include a stepped approach that highlights the elements required for minimum, essential and advanced surveillance, i.e. incorporating the <a href="#">WHO stepwise approach</a> , or similar.        |

|                                                                                                                                                      |                                                                                                                                                                                                     |                                                                                                                                                                    |                                                                                                                                                                                                                                                                                                                                                                                                                                                                                                                            |                                                                                                                                                                                                                                                                                                                                                                                                                                                                                               |
|------------------------------------------------------------------------------------------------------------------------------------------------------|-----------------------------------------------------------------------------------------------------------------------------------------------------------------------------------------------------|--------------------------------------------------------------------------------------------------------------------------------------------------------------------|----------------------------------------------------------------------------------------------------------------------------------------------------------------------------------------------------------------------------------------------------------------------------------------------------------------------------------------------------------------------------------------------------------------------------------------------------------------------------------------------------------------------------|-----------------------------------------------------------------------------------------------------------------------------------------------------------------------------------------------------------------------------------------------------------------------------------------------------------------------------------------------------------------------------------------------------------------------------------------------------------------------------------------------|
| Countries should have an electronic recording and reporting system for health care.                                                                  | 88b; NCD-GAP; 2030 Agenda<br>WHO – Global Strategy on Digital Health 2020-25; Global Action Plan on Epilepsy and other Neurological Disorders, strategic objective 4.2 Data and information systems | surveys and analysis. <sup>214</sup><br>Expertise in development and maintenance of secure online data to support rapid and simple input of patient-relevant data. | e) use of data to drive decision-making.<br><br>Major barriers include lack of:<br>(i) infrastructure to support an electronic data system<br>(ii) expertise to develop and maintain a secure record-keeping system<br>(iii) expertise to link data to other collection systems, e.g., death records, to enable assessment of outcomes; and<br>(iv) need for expertise in clinical coding including use of WHO ICD system<br>(v) develop tools to increase quality and coverage of mortality data including verbal autopsy | WSO implementation ecosystem on Stroke commissioners to develop, implement and monitor strategic action plan with all stakeholders to ensure availability of a secure data record system in their countries and regions. This could include the employment of Community Health Workers to register people in the community; this would include a capacity-building component to train them in use of technology, transport to enable collection of information, and appropriate remuneration. |
| Countries should establish national stroke organizations to guide and advocate for surveillance of stroke including burden, management, and outcomes | WHO – Global Strategy on Digital Health 2020-25; Global Action Plan on Epilepsy and other Neurological Disorders, global targets 1.1 and 1.2                                                        | Expertise in governance, co-design, interdisciplinary ways of working, consumer, and government engagement                                                         | Major barriers include lack of:<br>a) resources including cash and in-kind time to establish national networks of researchers and clinicians<br>b) funding to prepare national policy documents including stakeholder engagement; and<br>c) need for mentoring for leaders of new organizations                                                                                                                                                                                                                            | WSO implementation ecosystem on Stroke commissioners to develop national stroke organizations including mentoring and capacity building for health professionals and clinicians. This should include mechanisms to report to governments to enact meaningful and sustainable change.                                                                                                                                                                                                          |

**Supplementary Table 9: Estimated coverage and unmet needs for prevention, according to country**

| Country Name | Population 2018 | Population 2019 | Projected Population 2030 | Primary | Secondary | Overall | No. of hospitals | Complete items* | Estimated Unmet Needs*                                                                                                                                  |
|--------------|-----------------|-----------------|---------------------------|---------|-----------|---------|------------------|-----------------|---------------------------------------------------------------------------------------------------------------------------------------------------------|
| Albania      | 2866376         | 2867000         | 2830000                   | 50.0    | 60.0      | 55.0    | 1                | 9               | Need to further advance implementation of strategies for primary and secondary stroke prevention                                                        |
| Argentina    | 44494502        | 44901000        | 49069000                  | 16.7    | 20.0      | 18.3    | 3                | 2               | Need to develop and implement strategies for primary and secondary stroke prevention                                                                    |
| Armenia      | 2951776         | 2958000         | 2967000                   | 30.0    | 250       | 4.0     | 4                | 3               | Need to develop and implement strategies for primary and secondary stroke prevention                                                                    |
| Aruba        | 105845          | 106000          | 110000                    | 0.0     | 0.0       | 0.0     | 1                | 2               | Need to develop and implement strategies for primary and secondary stroke prevention                                                                    |
| Australia    | 24992369        | 25303000        | 28393000                  | 25.0    | 36.3      | 30.6    | 8                | 3.5             | Need to further advance implementation of strategies for primary and secondary stroke prevention                                                        |
| Austria      | 8847037         | 8865000         | 9017000                   | 50.0    | 50.0      | 50.0    | 2                | 8               | Need to further advance implementation of strategies for primary stroke prevention                                                                      |
| Bangladesh   | 161356039       | 163046000       | 178994000                 | 0.0     | 5.0       | 2.5     | 2                | 2.5             | Need to develop and implement strategies for primary and secondary stroke prevention                                                                    |
| Belarus      | 9485386         | 9467000         | 9191000                   | 0.0     | 30.0      | 15.0    | 1                | 8               | Need to develop and implement strategies for primary stroke prevention and further advance implementation of strategies for secondary stroke prevention |
| Belgium      | 11422068        | 11483000        | 11904000                  | 37.5    | 55.0      | 46.3    | 4                | 8               | Need to further advance implementation of strategies for primary and secondary stroke prevention                                                        |
| Benin        | 11485048        | 11801000        | 15672000                  | 0.0     | 30.0      | 15.0    | 1                | 10              | Need to develop and implement strategies for primary stroke prevention and further advance implementation of strategies for secondary stroke prevention |

|                  |            |            |            |      |      |      |    |      |                                                                                                                                                         |
|------------------|------------|------------|------------|------|------|------|----|------|---------------------------------------------------------------------------------------------------------------------------------------------------------|
| Bolivia          | 11353142   | 11513000   | 13240000   | 50.0 | 50.0 | 50.0 | 1  | 7    | Need to further advance implementation of strategies for primary and secondary stroke prevention                                                        |
| Brazil           | 209469333  | 211050000  | 223852000  | 22.9 | 26.3 | 24.6 | 24 | 3    | Need to further advance implementation of strategies for primary and secondary stroke prevention                                                        |
| Bulgaria         | 7024216    | 6970000    | 6338000    | 50.0 | 70.0 | 60.0 | 2  | 9.5  | Need to further advance implementation of strategies for primary and secondary stroke prevention                                                        |
| Burkina Faso     | 19751535   | 20321000   | 27404000   | 0.0  | 0.0  | 0.0  | 1  | 2    | Need to develop and implement strategies for primary and secondary stroke prevention                                                                    |
| Cameroon         | 25216237   | 25876000   | 33766000   | 0.0  | 50.0 | 25.0 | 1  | 7    | Need to develop and implement strategies for primary stroke prevention and further advance implementation of strategies for secondary stroke prevention |
| Canada           | 37058856   | 37375000   | 40352000   | 50.0 | 10.0 | 30.0 | 1  | 3    | Need to further advance implementation of strategies for primary and secondary stroke prevention                                                        |
| Chile            | 18729160   | 18952000   | 19458000   | 50.0 | 83.3 | 66.7 | 3  | 13   | Need to further advance implementation of strategies for primary and secondary stroke prevention                                                        |
| China            | 1392730000 | 1397295000 | 1416292000 | 40.0 | 30.0 | 35.0 | 5  | 5    | Need to further advance implementation of strategies for primary and secondary stroke prevention                                                        |
| Colombia         | 49648685   | 50339000   | 53417000   | 62.5 | 72.5 | 67.5 | 4  | 13.5 | Need to further advance implementation of strategies for primary and secondary stroke prevention                                                        |
| Congo, Dem. Rep. | 84068091   | 86791000   | 120047000  | 0.0  | 0.0  | 0.0  | 1  | 6    | Need to develop and implement strategies for primary and secondary stroke prevention                                                                    |
| Costa Rica       | 4999441    | 5048000    | 5468000    | 33.3 | 36.7 | 35.0 | 3  | 11   | Need to further advance implementation of strategies for primary and secondary stroke prevention                                                        |
| Croatia          | 4089400    | 4071000    | 3864000    | 50.0 | 65.5 | 57.7 | 11 | 11   | Need to further advance implementation of strategies for primary and secondary stroke prevention                                                        |

|                  |           |           |           |      |       |      |   |     |                                                                                                                                                         |
|------------------|-----------|-----------|-----------|------|-------|------|---|-----|---------------------------------------------------------------------------------------------------------------------------------------------------------|
| Czech Republic   | 10625695  | 10629000  | 10491000  | 0.0  | 50.0  | 25.0 | 2 | 7.5 | Need to develop and implement strategies for primary stroke prevention and further advance implementation of strategies for secondary stroke prevention |
| Denmark          | 5797446   | 5818000   | 6047000   | 50.0 | 65.0  | 57.5 | 2 | 9   | Need to further advance implementation of strategies for primary and secondary stroke prevention                                                        |
| Egypt, Arab Rep. | 98423595  | 100388000 | 120832000 | 16.7 | 46.7  | 31.7 | 3 | 11  | Need to further advance implementation of strategies for primary and secondary stroke prevention                                                        |
| Estonia          | 1320884   | 1317000   | 1265000   | 0.0  | 80.0  | 40.0 | 1 | 14  | Need to develop and implement strategies for primary stroke prevention and further advance implementation of strategies for secondary stroke prevention |
| Ethiopia         | 109224559 | 112079000 | 144944000 | 20.0 | 38.0  | 29.0 | 5 | 9   | Need to further advance implementation of strategies for primary and secondary stroke prevention                                                        |
| France           | 66987244  | 67211000  | 69509000  | 30.0 | 34.0  | 32.0 | 5 | 11  | Need to further advance implementation of strategies for primary and secondary stroke prevention                                                        |
| Georgia          | 3731000   | 3721000   | 3562000   | 50.0 | 100.0 | 75.0 | 1 | 17  | Need to further advance implementation of strategies for primary stroke prevention                                                                      |
| Germany          | 82927922  | 82806000  | 81520000  | 50.0 | 52.5  | 51.3 | 4 | 7   | Need to further advance implementation of strategies for primary and secondary stroke prevention                                                        |
| Ghana            | 29767108  | 30418000  | 37833000  | 75.0 | 55.0  | 65.0 | 2 | 14  | Need to further advance implementation of strategies for primary and secondary stroke prevention                                                        |
| Greece           | 10727668  | 10696000  | 10355000  | 50.0 | 80.0  | 65.0 | 1 | 17  | Need to further advance implementation of strategies for primary and secondary stroke prevention                                                        |
| Honduras         | 9587522   | 9746000   | 11449000  | 50.0 | 100.0 | 75.0 | 1 | 17  | Need to further advance implementation of strategies for primary stroke prevention                                                                      |

|                    |            |            |            |       |      |      |    |    |                                                                                                  |
|--------------------|------------|------------|------------|-------|------|------|----|----|--------------------------------------------------------------------------------------------------|
| Hong Kong          | 7451000    | 7508000    | 8024000    | 50.0  | 50.0 | 50.0 | 1  | 8  | Need to further advance implementation of strategies for primary and secondary stroke prevention |
| Hungary            | 9768785    | 9732000    | 9292000    | 50.0  | 50.0 | 50.0 | 1  | 10 | Need to further advance implementation of strategies for primary and secondary stroke prevention |
| India              | 1352617328 | 1366418000 | 1503642000 | 46.9  | 45.0 | 45.9 | 16 | 9  | Need to further advance implementation of strategies for primary and secondary stroke prevention |
| Iran, Islamic Rep. | 81800269   | 82914000   | 92664000   | 50.0  | 80.0 | 65.0 | 1  | 17 | Need to further advance implementation of strategies for primary and secondary stroke prevention |
| Ireland            | 4853506    | 4893000    | 5255000    | 50.0  | 50.0 | 50.0 | 1  | 7  | Need to further advance implementation of strategies for primary and secondary stroke prevention |
| Israel             | 8883800    | 9018000    | 10471000   | 50.0  | 90.0 | 70.0 | 1  | 16 | Need to further advance implementation of strategies for primary and secondary stroke prevention |
| Italy              | 60431283   | 60340000   | 59196000   | 37.5  | 70.0 | 53.8 | 4  | 14 | Need to further advance implementation of strategies for primary and secondary stroke prevention |
| Japan              | 126529100  | 126097000  | 120095000  | 0.0   | 5.0  | 2.5  | 2  | 2  | Need to develop and implement strategies for primary and secondary stroke prevention             |
| Kazakhstan         | 18276499   | 18469000   | 20165000   | 35.0  | 45.0 | 40.0 | 10 | 11 | Need to further advance implementation of strategies for primary and secondary stroke prevention |
| Kenya              | 51393010   | 52574000   | 66450000   | 0.0   | 10.0 | 5.0  | 1  | 2  | Need to further advance implementation of strategies for primary and secondary stroke prevention |
| Korea, Rep.        | 51635256   | 51782000   | 52975000   | 33.3  | 67.8 | 50.6 | 9  | 13 | Need to further advance implementation of strategies for primary and secondary stroke prevention |
| Kyrgyz Republic    | 6315800    | 6404000    | 7218000    | 100.0 | 90.0 | 95.0 | 1  | 17 | Need to further advance implementation of strategies for secondary stroke prevention             |



|                 |           |           |           |      |      |      |   |      |                                                                                                  |
|-----------------|-----------|-----------|-----------|------|------|------|---|------|--------------------------------------------------------------------------------------------------|
| Latvia          | 1926542   | 1916000   | 1796000   | 50.0 | 62.5 | 56.3 | 4 | 13.5 | Need to further advance implementation of strategies for primary and secondary stroke prevention |
| Lebanon         | 6848925   | 6856000   | 6195000   | 0.0  | 10.0 | 5.0  | 1 | 2    | Need to further advance implementation of strategies for primary and secondary stroke prevention |
| Malaysia        | 31528585  | 31950000  | 36095000  | 43.8 | 42.5 | 43.1 | 8 | 6    | Need to further advance implementation of strategies for primary and secondary stroke prevention |
| Mexico          | 126190788 | 127576000 | 140876000 | 25.0 | 75.0 | 50.0 | 2 | 12   | Need to further advance implementation of strategies for primary and secondary stroke prevention |
| Moldova         | 3545883   | 3536000   | 3368000   | 37.5 | 61.3 | 49.4 | 8 | 13   | Need to further advance implementation of strategies for primary and secondary stroke prevention |
| Morocco         | 36029138  | 36472000  | 40887000  | 50.0 | 33.3 | 41.7 | 3 | 11   | Need to further advance implementation of strategies for primary and secondary stroke prevention |
| Nepal           | 28087871  | 28609000  | 33390000  | 31.3 | 52.5 | 41.9 | 8 | 9.5  | Need to further advance implementation of strategies for primary and secondary stroke prevention |
| New Zealand     | 4885500   | 4929000   | 5342000   | 66.7 | 66.7 | 66.7 | 3 | 7    | Need to further advance implementation of strategies for primary and secondary stroke prevention |
| Nigeria         | 195874740 | 200964000 | 262977000 | 16.7 | 25.0 | 20.8 | 6 | 6.5  | Need to further advance implementation of strategies for primary and secondary stroke prevention |
| North Macedonia | 2082958   | 2083000   | 2051000   | 50.0 | 50.0 | 50.0 | 1 | 11   | Need to further advance implementation of strategies for primary and secondary stroke prevention |
| Norway          | 5314336   | 5369000   | 5854000   | 50.0 | 50.0 | 50.0 | 3 | 6    | Need to further advance implementation of strategies for primary and secondary stroke prevention |

|                    |           |           |           |      |      |      |   |      |                                                                                                                                                         |
|--------------------|-----------|-----------|-----------|------|------|------|---|------|---------------------------------------------------------------------------------------------------------------------------------------------------------|
| Pakistan           | 212215030 | 216565000 | 262959000 | 0.0  | 40.0 | 20.0 | 1 | 7    | to develop and implement strategies for primary stroke prevention and further advance implementation of strategies for secondary stroke prevention      |
| Panama             | 4176873   | 4246000   | 4928000   | 0.0  | 90.0 | 45.0 | 1 | 11   | Need to develop and implement strategies for primary stroke prevention and further advance implementation of strategies for secondary stroke prevention |
| Papua New Guinea   | 8606316   | 8776000   | 10709000  | 0.0  | 0.0  | 0.0  | 1 | 3    | Need to develop and implement strategies for primary stroke prevention and secondary stroke prevention                                                  |
| Paraguay           | 6956071   | 7045000   | 7950000   | 50.0 | 10.0 | 30.0 | 1 | 3    | Need to further advance implementation of strategies for primary and secondary stroke prevention                                                        |
| Peru               | 31989256  | 32510000  | 36031000  | 0.0  | 25.0 | 12.5 | 2 | 9.5  | Need to develop and implement strategies for primary stroke prevention and further advance implementation of strategies for secondary stroke prevention |
| Poland             | 37978548  | 37895000  | 36474000  | 25.0 | 85.0 | 55.0 | 2 | 13.5 | Need to further advance implementation of strategies for primary and secondary stroke prevention                                                        |
| Portugal           | 10281762  | 10237000  | 9832000   | 38.9 | 32.2 | 35.6 | 9 | 5    | Need to further advance implementation of strategies for primary and secondary stroke prevention                                                        |
| Russian Federation | 144478050 | 144369000 | 140912000 | 50.0 | 70.0 | 60.0 | 2 | 12.5 | Need to further advance implementation of strategies for primary and secondary stroke prevention                                                        |
| Rwanda             | 12301939  | 12627000  | 16234000  | 50.0 | 10.0 | 30.0 | 1 | 4    | Need to further advance implementation of strategies for primary and secondary stroke prevention                                                        |
| Serbia             | 6982084   | 6955000   | 6625000   | 25.0 | 61.7 | 43.3 | 6 | 11   | Need to further advance implementation of strategies for primary and secondary stroke prevention                                                        |

|                 |          |          |          |      |      |      |    |     |                                                                                                                                                         |
|-----------------|----------|----------|----------|------|------|------|----|-----|---------------------------------------------------------------------------------------------------------------------------------------------------------|
| Seychelles      | 96762    | 97000    | 99000    | 0.0  | 25.0 | 12.5 | 2  | 6.5 | Need to develop and implement strategies for primary stroke prevention and further advance implementation of strategies for secondary stroke prevention |
| Singapore       | 5638676  | 5710000  | 6157000  | 40.0 | 36.0 | 38.0 | 5  | 3   | Need to further advance implementation of strategies for primary and secondary stroke prevention                                                        |
| Slovak Republic | 5447011  | 5448000  | 5377000  | 16.7 | 36.7 | 26.7 | 3  | 2   | Need to further advance implementation of strategies for primary and secondary stroke prevention                                                        |
| South Africa    | 57779622 | 58558000 | 65956000 | 37.5 | 47.5 | 42.5 | 3  | 9   | Need to further advance implementation of strategies for primary and secondary stroke prevention                                                        |
| Sri Lanka       | 21670000 | 21757000 | 22234000 | 0.0  | 12.5 | 6.3  | 4  | 2.5 | Need to develop and implement strategies for primary stroke prevention and further advance implementation of strategies for secondary stroke prevention |
| Sudan           | 41801533 | 42813000 | 55254000 | 50.0 | 30.0 | 40.0 | 2  | 7   | Need to further advance implementation of strategies for primary and secondary stroke prevention                                                        |
| Sweden          | 10183175 | 10251000 | 10933000 | 37.5 | 32.5 | 35.0 | 4  | 2.5 | Need to further advance implementation of strategies for primary and secondary stroke prevention                                                        |
| Taiwan          | 23726460 | 23773876 | 24011258 | 66.7 | 58.3 | 62.5 | 6  | 9   | Need to further advance implementation of strategies for primary and secondary stroke prevention                                                        |
| Thailand        | 69428524 | 69626000 | 70346000 | 66.7 | 96.7 | 81.7 | 3  | 16  | Need to further advance implementation of strategies for primary and secondary stroke prevention                                                        |
| Turkey          | 82319724 | 83430000 | 89158000 | 43.8 | 51.9 | 47.8 | 16 | 9   | Need to further advance implementation of strategies for primary and secondary stroke prevention                                                        |
| Uganda          | 42723139 | 44270000 | 59438000 | 0.0  | 40.0 | 20.0 | 1  | 7   | Need to develop and implement strategies for primary stroke prevention and further advance                                                              |

|                      |           |           |           |      |      |      |    |    |  | implementation of strategies for secondary stroke prevention                                                                                            |
|----------------------|-----------|-----------|-----------|------|------|------|----|----|--|---------------------------------------------------------------------------------------------------------------------------------------------------------|
| Ukraine              | 44622516  | 44391000  | 41719000  | 37.5 | 70.0 | 53.8 | 4  | 14 |  | Need to further advance implementation of strategies for primary and secondary stroke prevention                                                        |
| United Arab Emirates | 9630959   | 9771000   | 10661000  | 50.0 | 40.0 | 45.0 | 1  | 7  |  | Need to further advance implementation of strategies for primary and secondary stroke prevention                                                        |
| United Kingdom       | 66488991  | 66856000  | 70277000  | 28.1 | 30.0 | 29.1 | 16 | 3  |  | Need to further advance implementation of strategies for primary and secondary stroke prevention                                                        |
| United States        | 327167434 | 329534000 | 354448000 | 30.0 | 42.7 | 36.3 | 15 | 7  |  | Need to further advance implementation of strategies for primary and secondary stroke prevention                                                        |
| Uruguay              | 3449299   | 3462000   | 3569000   | 50.0 | 80.0 | 65.0 | 1  | 17 |  | Need to further advance implementation of strategies for primary and secondary stroke prevention                                                        |
| Vietnam              | 95540395  | 96462000  | 104164000 | 50.0 | 50.0 | 50.0 | 1  | 7  |  | Need to further advance implementation of strategies for primary and secondary stroke prevention                                                        |
| Wales                | 3,139,308 | 3,151,569 | 3,234,289 | 0.0  | 10.0 | 5.0  | 1  | 2  |  | Need to develop and implement strategies for primary stroke prevention and further advance implementation of strategies for secondary stroke prevention |

\* Refers to median number of questions answered (out of 17 possible questions) for each country.

Supplementary Table 10. Summary of barriers and facilitators to stroke prevention services

|                                | Barriers                                                                                                                   | Facilitators                                                                                                                                         | Recommendations                                                                                                                                                      |
|--------------------------------|----------------------------------------------------------------------------------------------------------------------------|------------------------------------------------------------------------------------------------------------------------------------------------------|----------------------------------------------------------------------------------------------------------------------------------------------------------------------|
| <b>Service provision</b>       | Unequal distribution of services across the country                                                                        | Wide network of service delivery (through GP or community health staff)                                                                              | Establish a continuum of care for stroke prevention<br>Improve population health literacy on stroke prevention                                                       |
|                                | Low health literacy of the population regarding stroke prevention                                                          | Coordinated service delivery for primary and secondary stroke prevention                                                                             |                                                                                                                                                                      |
|                                | Lack of continuum of stroke prevention services                                                                            | Primary stroke prevention activities are led by the government                                                                                       |                                                                                                                                                                      |
| <b>Workforce</b>               | Lack of health staff                                                                                                       | High capacity and motivation of staff                                                                                                                | Provide training for health staff, especially primary health care and community health workers on stroke prevention.                                                 |
|                                | Lack of incentive for health staff to work in rural areas                                                                  | Availability of training opportunity for health staff                                                                                                | Improve incentives for health staff in rural areas to encourage relocation and retention                                                                             |
|                                | Lack of stroke-specific training for health staff                                                                          |                                                                                                                                                      |                                                                                                                                                                      |
| <b>Information system</b>      | Lack of adequate and systematic information                                                                                | Data used for auditing and benchmarking<br>Availability of a national database                                                                       | Identify key data to be collected at all facilities to contribute to national priority setting, monitoring and evaluation of stroke prevention                       |
|                                | Lack of data use for decision making                                                                                       |                                                                                                                                                      |                                                                                                                                                                      |
| <b>Technology and supplies</b> | Unavailability of medications                                                                                              | Advancement in information technology infrastructure                                                                                                 | Essential drugs for secondary prevention should be subsidized by the government and made available at all hospitals.                                                 |
|                                | Inadequate infrastructure to implement new technologies                                                                    | Use of social media for primary stroke prevention                                                                                                    | Use social media to deliver stroke prevention communication and education                                                                                            |
|                                | Lack of access to new technologies                                                                                         |                                                                                                                                                      |                                                                                                                                                                      |
| <b>Finance</b>                 | Lack of funding                                                                                                            | Adequate resources allocated for stroke prevention                                                                                                   | Primary and secondary stroke prevention services should be covered by the national health insurance/universal health coverage                                        |
|                                | Lack of universal health coverage or government-subsidized services                                                        | Universal health coverage<br>Government-subsidized or low fee prevention services                                                                    | Government to set a fixed proportion of annual health funding for stroke prevention activities                                                                       |
|                                |                                                                                                                            |                                                                                                                                                      |                                                                                                                                                                      |
| <b>Governance</b>              | Stroke prevention has low priority on government agenda                                                                    | National policy to control risk factors for cardiovascular diseases or stroke                                                                        | Develop/update national strategy on cardiovascular diseases/stroke prevention                                                                                        |
|                                | Lack of national strategy for cardiovascular diseases and/or stroke prevention. Lack of clear stroke prevention guidelines | Availability of clear guidelines for stroke prevention. Participation of stroke organization in advocacy and policy development in stroke prevention | Develop/update national guidelines for stroke prevention.<br>Enhance the involvement of stroke organizations in advocacy and policy development in stroke prevention |
|                                |                                                                                                                            |                                                                                                                                                      |                                                                                                                                                                      |

**Supplementary Table 11: Key recommendations for healthcare providers and governments to improve primordial, primary and secondary stroke prevention**

| Key recommendations                                                                                                                                                                                                                                                                                                                                                                                                                                                                                                                                                                                                                                                                                                 | Source                                                                                                                                                                                                           | Level of evidence/<br>GRADE <sup>4</sup>                                                                                                                                                                                                                                     | Resources<br>required for<br>implementation                                                             | Political, legal, ethical, sociocultural<br>and economic considerations for<br>barriers and facilitators                                                                                                                                                                                                                                                                                                                                                                                                    | Recommendation for<br>implementation through WSO<br>implementation ecosystem on<br>Stroke                                                                                                                                                                                                                                                                                                                                                                                                                                                                                                                |
|---------------------------------------------------------------------------------------------------------------------------------------------------------------------------------------------------------------------------------------------------------------------------------------------------------------------------------------------------------------------------------------------------------------------------------------------------------------------------------------------------------------------------------------------------------------------------------------------------------------------------------------------------------------------------------------------------------------------|------------------------------------------------------------------------------------------------------------------------------------------------------------------------------------------------------------------|------------------------------------------------------------------------------------------------------------------------------------------------------------------------------------------------------------------------------------------------------------------------------|---------------------------------------------------------------------------------------------------------|-------------------------------------------------------------------------------------------------------------------------------------------------------------------------------------------------------------------------------------------------------------------------------------------------------------------------------------------------------------------------------------------------------------------------------------------------------------------------------------------------------------|----------------------------------------------------------------------------------------------------------------------------------------------------------------------------------------------------------------------------------------------------------------------------------------------------------------------------------------------------------------------------------------------------------------------------------------------------------------------------------------------------------------------------------------------------------------------------------------------------------|
| Countries should have government endorsed policies for community-wide stroke prevention.                                                                                                                                                                                                                                                                                                                                                                                                                                                                                                                                                                                                                            | UN/WHO <sup>215</sup> Action plan for stroke in Europe, <sup>11</sup> AHA Guide for improving cardiovascular health at the community level <sup>216</sup>                                                        | Level B evidence that tobacco, <sup>214,217,218</sup> salt <sup>219,220</sup> and alcohol <sup>9-13,221-225</sup> taxation is an effective strategy to improve health. Level A evidence for population-wide primary stroke and other NCD prevention <sup>14-16,226-228</sup> | Expertise in stroke and CVD epidemiology and public health                                              | Major barriers: Industry lobbying (e.g., for reducing salt content in processed food, reducing consumption of sugary drinks, alcohol) as well as lack of:<br>a) expertise to develop an efficient action plan<br>b) community support for introducing taxation on salt, sugary drinks, alcohol, tobacco products<br>c) government and health policy engagement; and<br>d) public resources for accessible and affordable healthy food outlets, physical activity facilities, healthy ecological environment | WSO implementation ecosystem on Stroke commissioners to develop legislative changes for reducing salt content in processed food, reducing consumption of sugary drinks, alcohol, including development of policies for community-wide stroke prevention activities, monitoring effectiveness of these activities, and workforce development. Reinvestment of taxation revenue into primary (including the development of accessible and affordable healthy food outlets, physical activity facilities, reducing air pollution) and secondary prevention, health service development and health research. |
| Countries should have ongoing stroke awareness and prevention campaigns and interventions. The main risk factors to be targeted for primary stroke prevention are: elevated blood pressure ( $\geq 120/80$ ), low physical activity (<2½ hours a week of moderate to vigorous exercise), poor unbalanced diet (e.g. less than 6 servings a day of fruits or vegetables), excessive sodium (>2 g/day; equivalent to 5 g/salt/day) intake, overweight (BMI $\geq 25$ or waist-to-hip ratio $\geq 0.8$ for women and $\geq 0.9$ for men), tobacco use, cardiac causes (coronary heart disease, atrial fibrillation (AF), valve disease, heart failure), dyslipidaemia (total cholesterol $\geq 5$ mmol/L or 200 mg/dL; | WSO, <sup>109</sup> WHO <sup>238</sup> , Action plan for stroke in Europe, <sup>11</sup> Gramado Declaration <sup>32</sup><br><br>AHA stroke primary and secondary prevention guidelines, <sup>234,237,239</sup> | Level B evidence. <sup>226-228</sup> WHO 'One Health' initiative <sup>238</sup> Level A evidence for risk factors control for stroke prevention <sup>24,29,30,234,239,246</sup>                                                                                              | Expertise in development and maintenance of awareness campaigns; electronic patient management systems. | Major barriers include lack of:<br>(vi) engagement of stakeholders (patients, populace, providers, and policy makers)<br>(vii) collaboration between multiple sectors of society (e.g., government, public health, research/education)                                                                                                                                                                                                                                                                      | WSO implementation ecosystem on Stroke commissioners to develop strategies and action plans for ongoing stroke awareness and primary prevention, with a strong emphasis in LMICs on early detection and management of elevated BP, and on reduction of exposure to air pollution. They should develop a plan for                                                                                                                                                                                                                                                                                         |

LDL-C  $\geq 4$  mmol/L or  $\geq 150$  mg/dL; HDL-C  $< 1$  mmol/L or  $< 40$  mg/dL; triglycerides  $> 1.7$  mmol/L or 150/mg/dL), persistent stress or depression, alcohol consumption ( $> 1$  standard drink a day), and diabetes mellitus. Primary stroke prevention is cost-effective: investing US\$1.27 per person per year in LMICs until 2030 can save an estimated 8.2 million lives and yield a return on investment of at least US\$7.<sup>229,230</sup> Non-pharmacological and motivational cognitive-behavioural interventions are recommended for lifestyle risk management. For example, regular physical activity before the index event was found to be associated with reduced risk of poor functional outcome after stroke (OR 0.52, 95% CI 0.42–0.66;  $p < 0.0001$ ).

For primary stroke and CVD prevention, polypill containing generic BP-lowering medications and statin can be recommended in adults at intermediate (10-20% 10-year Framingham Risk Score) or greater CVD risk,<sup>231</sup> and no contraindications to the medications. Individuals aged 40-75 years with isolated hypercholesterolaemia of LDL-C  $\geq 4.9$  mmol/L ( $\geq 190$  mg/dL) should receive high-intensity statin therapy without calculating CVD risk. Individuals of that age group with LDL-C levels  $\geq 70$  mg/dL to 189 mg/dL ( $\geq 1.8$ -4.9 mmol/L) should receive statin therapy if their 10-year CVD risk is 7.5-19.9% (if a decision about statin therapy is uncertain, a clinician should consider measuring coronary artery calcium).<sup>232</sup> Aspirin should not be routinely used for primary stroke prevention, but is recommended for secondary stroke prevention after TIA or ischaemic stroke. Pharmacological treatment of elevated blood pressure for primary stroke prevention should be initiated in (a) people with SBP  $\geq 140$  mmHg or DBP  $\geq 90$  mmHg, or (b) people with existing CVD and SBP 130-139 mmHg, or (c) people with SBP 130-139 mmHg but without CVD who are at high CVD risk (10-year Framingham Risk Score  $> 20\%$ ), diabetes mellitus, or chronic kidney disease.<sup>233</sup> The use of BP-lowering medications for secondary stroke prevention in people with clinical CVD should be initiated with BP  $\geq 130/80$  mmHg.<sup>234,235</sup> Most individuals with SBP  $\geq 140$  or DBP  $\geq 90$  mmHg are high risk and indicated for pharmacological treatment; they do not require CVD risk assessment prior to initiating treatment.

Secondary stroke prevention interventions have been shown to be cost-effective.<sup>236</sup> For secondary stroke prevention, control of hypertension, blood glucose, and lipids (regardless of their level) as well as timely diagnostic evaluation are effective.<sup>234</sup> For those

WHO Guidelines,<sup>233</sup> INTERSTROKE Study,<sup>240</sup> GBD Study,<sup>241</sup> Framingham Study,<sup>242,243</sup> White Paper for Circulatory Health,<sup>244</sup> European Guidelines on CVD prevention.<sup>245</sup>

Level A evidence for use of polypill<sup>231,247,248</sup> for BP and cholesterol reduction.<sup>232,234,235</sup> Level A evidence for use of antiplatelet therapy, oral anticoagulation, blood pressure and lipid lowering therapy, and carotid revascularization for secondary stroke prevention.<sup>232,249-261</sup> Level of evidence for lifestyle modifications for secondary stroke prevention: smoking cessation and healthy balanced diet (B),<sup>262-264</sup> limited alcohol consumption and sodium intake, regular physical activity, normal BMI (C),<sup>31,54,55,240,264,265</sup> and salt substitute (A).<sup>266</sup>

prioritization of multisectoral and cost-effective accessible and affordable interventions, including implementation of and digital technologies for promoting healthy lifestyle<sup>267-270</sup> and primary/secondary stroke prevention.<sup>28,61-65,32,101,111,112,268,271,272</sup> For example, population-wide strategies recently recommended for implementation for stroke prevention in all Latin American countries (e.g. the free Stroke Riskometer app),<sup>32</sup> should be one of the priorities for funders and policy makers.<sup>32,271</sup> A sustained TV-led FAST education campaign led to significant improvement of stroke awareness and timely hospital admissions in the UK.<sup>273</sup> There is evidence that multidomain lifestyle intervention is effective for primary and secondary stroke prevention.<sup>274</sup> Legislative changes in South Africa led to the reduction of salt consumption.<sup>275</sup> Evidence-based digital tools (e.g. the PreventS-MD webapp)<sup>112,272</sup> and most recent ASA/AHA guidelines for secondary stroke prevention recommend them in patients with stroke and TIA<sup>111,234,276</sup> for use and adaptation for local conditions, when required.

requiring pharmacological therapy, the target blood pressure should generally be <130/80 mm Hg.<sup>234,235,237</sup>

Countries should have a nationwide and representative system for measuring and monitoring effects of primary and secondary stroke prevention activities (for more details see surveillance section). This should include a stepped approach that highlights the elements required for minimum (hospitalized events), essential and advanced monitoring, i.e. incorporating the WHO stepwise approach<sup>277</sup> or similar.<sup>278-280</sup>

In patients with nonvalvular AF (including paroxysmal) or atrial flutter and stroke or TIA, oral anticoagulation is recommended.<sup>234</sup>

Ischaemic stroke patients with severe stenosis ipsilateral to a nondisabling stroke or TIA who are candidates for intervention should have the stenosis fixed, likely relatively early after their ischemic stroke.<sup>234</sup> The choice between carotid endarterectomy and carotid artery stenting should be driven by specific patient comorbidities and features of their vascular anatomy.<sup>234</sup> Large health service providers should have outpatient Stroke Clinics to facilitate GPs in better management of post-discharge stroke/TIA patients. In LMICs with high rate of rheumatic heart disease Oral Anticoagulation Clinics are also recommended.

WHO STEPs,<sup>277</sup>  
Action plan for  
stroke in Europe<sup>11</sup>

Level B evidence

Expertise in epidemiology, data management and statistics to support ongoing monitoring of stroke.

Major barriers include lack of:  
(vii) infrastructure to support a monitoring program  
(viii) expertise to develop an efficient program  
(ix) capacity to analyse the data collected and produce quality statistics  
(x) use of data to drive decision-making.

WSO implementation ecosystem on Stroke commissioners to develop, implement and monitor reliable, simple, and fit-for-purpose strategic action plan with all stakeholders to ensure availability of a reliable monitoring of stroke and risk factors standardized surveillance systems in their countries and regions.



**Supplementary Table 12: Identified problems with and suggested strategies for policy makers to achieve sustainable and appropriate primary and secondary stroke prevention**

| <b>Problems</b>                                                                                                                                                                                                                                                                                                 | <b>Goals</b>                                                                                                                                            | <b>Targets</b>                                                                                                                           | <b>Recommendations/Actions</b>                                                                                                                                                                                                                                                                                                                                                                                                                                                                                                                                                                                                                                                                                                                                                                                                                                                                                                                                                                                                                                                                                                                                                                                                                                                                                                                                                                                                                                                                                                                                                                                                | <b>Assessment methods</b>                                                                                                                                                                                                                                                                                                                                         |
|-----------------------------------------------------------------------------------------------------------------------------------------------------------------------------------------------------------------------------------------------------------------------------------------------------------------|---------------------------------------------------------------------------------------------------------------------------------------------------------|------------------------------------------------------------------------------------------------------------------------------------------|-------------------------------------------------------------------------------------------------------------------------------------------------------------------------------------------------------------------------------------------------------------------------------------------------------------------------------------------------------------------------------------------------------------------------------------------------------------------------------------------------------------------------------------------------------------------------------------------------------------------------------------------------------------------------------------------------------------------------------------------------------------------------------------------------------------------------------------------------------------------------------------------------------------------------------------------------------------------------------------------------------------------------------------------------------------------------------------------------------------------------------------------------------------------------------------------------------------------------------------------------------------------------------------------------------------------------------------------------------------------------------------------------------------------------------------------------------------------------------------------------------------------------------------------------------------------------------------------------------------------------------|-------------------------------------------------------------------------------------------------------------------------------------------------------------------------------------------------------------------------------------------------------------------------------------------------------------------------------------------------------------------|
| Lack of funding for primary stroke prevention across all countries, particularly in LMICs                                                                                                                                                                                                                       | To provide sufficient funding for primary and secondary stroke prevention                                                                               | Governments and politicians                                                                                                              | Encourage all governments and politicians to re-invest revenues from taxation on unhealthy products (e.g., tobacco, sugary drinks, alcohol, salt in processed food, reduced consumption) back to health services and preventative strategies<br>All healthcare policy makers should be aware that for every US\$1 spent on prevention of stroke and CVD there are over US\$10 returns on investment                                                                                                                                                                                                                                                                                                                                                                                                                                                                                                                                                                                                                                                                                                                                                                                                                                                                                                                                                                                                                                                                                                                                                                                                                           | Proportion of funding allocated to primary and secondary stroke prevention                                                                                                                                                                                                                                                                                        |
| Few countries or regions have established action plans for stroke prevention. Low level of secondary prevention activities, especially in LMICs and activities related to education about stroke and lifestyle management for stroke patients and their families, stroke/TIA clinics and guidelines utilization | To establish country-specific action plans and stroke prevention guidelines for every country in the world                                              | The whole population for population-wide prevention strategies and individuals at any level of risk for individual prevention strategies | All governments should allocate sufficient funding for the development and implementation of primary stroke prevention strategies<br>All countries should have financially sustainable action plans for primary and secondary stroke prevention<br>All countries should have culturally appropriate guidelines for primary and secondary stroke prevention<br>Adults are encouraged to use the freely available and validated mobile apps for managing their risk factors (e.g., the WSO recommended free Stroke Riskometer app)<br>Upskilling of health staff, including doctors, nurses, and other support staff, in the primary and secondary prevention of stroke, including providing advice on lifestyle changes and adherence to medications<br>Transferring tasks of primary stroke prevention from highly trained health professionals to healthcare workers with less training, qualifications, and education should be encouraged<br>Culturally appropriate education about healthy lifestyles should be incorporated into standard education curricula and started early in life, with reinforcement across the lifespan<br>Service providers should ensure adequate health services for people with acute cerebrovascular diseases to reduce the risk of recurrent stroke, including multidisciplinary acute stroke units, outpatient stroke/TIA clinics and routinely available education about stroke and lifestyle management for stroke patients and their families, ongoing stroke and risk factors awareness campaigns, and availability of valid digital secondary stroke prevention tools for clinicians | Stroke incidence, mortality, and disability<br>Prevalence of risk factors<br>5 or 10-year risk of CVD and/or stroke<br>Availability of stroke/TIA and stroke prevention clinics and proportion of people at risk of stroke and people who have experienced a stroke or TIA managed in such clinics<br>Proportion of evidence-based decisions in stroke prevention |
| Lack of integrative approach and digital tools for primary and secondary stroke prevention interventions, particularly in LMICs                                                                                                                                                                                 | To establish collaboration between different national and international agencies and organizations involved in primary and secondary prevention of NCDs | National and international agencies and organizations                                                                                    | Include nationally and internationally recognized stroke experts in all relevant national and international agencies and organizations involved in primary and secondary prevention of NCDs<br>Priority in the primary stroke prevention strategies should be given to the reduction of exposure to CVD risk factors of the whole population across the life course, with the focus on behavioural and lifestyle risk factors, thus allowing an integrative approach that also targets other major NCDs, such as dementia, diabetes, cancer, and pulmonary diseases. Absolute CVD risk treatment thresholds should not be the sole criteria for selecting individuals for pharmacological management of elevated blood pressure and lipids. Categorization of people into low, moderate (mild) and high absolute CVD risk (including use of risk-stratified heat maps)                                                                                                                                                                                                                                                                                                                                                                                                                                                                                                                                                                                                                                                                                                                                                        | Representation of stroke experts in all relevant national and international agencies and organizations involved in primary prevention of NCDs                                                                                                                                                                                                                     |

|                                                                                                   |                                                                                                         |                                               |                                                                                                                                                                                                                                                                                                                                                                                                                                                                                                                                                                                                                                                                       |                                                                                                                                                                                                                                                                                                                                             |
|---------------------------------------------------------------------------------------------------|---------------------------------------------------------------------------------------------------------|-----------------------------------------------|-----------------------------------------------------------------------------------------------------------------------------------------------------------------------------------------------------------------------------------------------------------------------------------------------------------------------------------------------------------------------------------------------------------------------------------------------------------------------------------------------------------------------------------------------------------------------------------------------------------------------------------------------------------------------|---------------------------------------------------------------------------------------------------------------------------------------------------------------------------------------------------------------------------------------------------------------------------------------------------------------------------------------------|
| Low stroke awareness across all countries                                                         | To establish national ongoing stroke awareness campaigns about stroke, its warning signs and prevention | The whole population                          | <p>when communicating risk should be abandoned, and individual primary stroke and CVD prevention interventions should include all people at increased risk of stroke and CVD regardless of the level of the increased risk.</p> <p>All countries should be encouraged to adapt validated, affordable, and culturally appropriate digital tools for secondary stroke prevention.</p> <p>All national and regional stroke organizations should conduct ongoing stroke awareness campaigns about stroke, its warning signs and prevention, coordinated by the World Stroke Organization. Regular TV programmes are the preferred channel of media for such campaigns</p> | Stroke awareness surveys                                                                                                                                                                                                                                                                                                                    |
| Lack of monitoring systems for evaluation of the effectiveness of preventative strategies         | To establish national and subnational (for large countries) monitoring frameworks                       | Whole population and people at risk of stroke | <p>All countries should have monitoring systems to evaluate the effects of primary and secondary prevention strategies</p> <p>In the absence of sufficient quality country-specific epidemiological data on stroke burden and risk factors, healthcare policy makers should be encouraged to use relevant Global Burden of Disease estimates</p> <p>Regular use of accurate data to support decision-making</p> <p>In consultation with recognized regional experts on stroke and public health, allocate sufficient funding for research in primary and secondary stroke prevention</p>                                                                              | Changes in the 5- or 10-year absolute risk of stroke/CVD of outpatients<br>Registries of recurrent strokes/TIA (including their outcomes), digital tools for monitoring trends in stroke/CVD risk and risk factors<br>Proportion of research funding allocated to primary stroke prevention (compared to the total health research funding) |
| Insufficient funding of stroke prevention research across all countries, particularly in LMICs    | To study determinants of stroke occurrence and outcomes and the best strategies to reduce stroke burden | Health research funding agencies              | In consultation with recognized regional experts on stroke and public health, allocate sufficient funding for research in primary and secondary stroke prevention                                                                                                                                                                                                                                                                                                                                                                                                                                                                                                     | Proportion of research funding allocated to primary stroke prevention (compared to the total health research funding)                                                                                                                                                                                                                       |
| Affordability of essential drugs for primary and secondary stroke prevention across all countries | To establish a list of essential drugs for primary and secondary stroke                                 | People at risk of stroke                      | All countries should have a list of essential drugs for primary and secondary stroke prevention funded by the government                                                                                                                                                                                                                                                                                                                                                                                                                                                                                                                                              | Availability of government subsidized essential drugs for primary and secondary stroke prevention aligned with the WHO list of essential drugs                                                                                                                                                                                              |

**Supplementary Table 13: Estimated coverage and unmet needs for acute care according to country**

| Country Name | Population 2018 | Population 2019 | Projected Population 2030 | Estimated Coverage for Acute care |                      |                  |                   |                    | Estimated Unmet Needs*                                                                                                  |
|--------------|-----------------|-----------------|---------------------------|-----------------------------------|----------------------|------------------|-------------------|--------------------|-------------------------------------------------------------------------------------------------------------------------|
|              |                 |                 |                           | Section Score                     | Guidelines Protocols | Acute Treatments | Acute Stroke Unit | General acute care |                                                                                                                         |
| Albania      | 2866376         | 2867000         | 2830000                   | 70.3                              | 0.0                  | 100.0            | 100.0             | 44.4               | Only 1 hospital represented in the survey, need to follow guidelines and implement protocols                            |
| Argentina    | 44494502        | 44901000        | 49069000                  | 47.2                              | 40.0                 | 58.3             | 100.0             | 63.0               | Only 2 hospitals represented, the country needs to implement stroke centres, guidelines, protocol                       |
| Armenia      | 2951776         | 2958000         | 2967000                   | 0.0                               | 25.0                 | 8.7              | 100.0             | 25.0               | Need to implement stroke centres and acute care in the country                                                          |
| Aruba        | 105845          | 106000          | 110000                    | 0.0                               | 0.0                  | 0.0              | 0.0               | 0.0                | Need to implement stroke centres and acute care in the country                                                          |
| Australia    | 24992369        | 25303000        | 28393000                  | 50.5                              | 40.0                 | 59.4             | 100.0             | 69.4               | Need to improve acute treatments, same number of stroke units may still be adequate in 2030                             |
| Austria      | 8847037         | 8865000         | 9017000                   | 42.6                              | 40.0                 | 50.0             | 100.0             | 72.2               | Same number of stroke units may still be adequate in 2030                                                               |
| Bangladesh   | 161356039       | 163046000       | 178994000                 | 10.5                              | 0.0                  | 0.0              | 50.0              | 44.4               | Need to implement stroke centres and acute care in the country                                                          |
| Belarus      | 9485386         | 9467000         | 9191000                   | 22.5                              | 0.0                  | 25.0             | 100.0             | 77.8               | Only 1 hospital represented in the survey, need to follow guidelines, implement protocols and acute care in the country |

|                  |            |            |            |      |      |      |       |      |                                                                                                                                                 |
|------------------|------------|------------|------------|------|------|------|-------|------|-------------------------------------------------------------------------------------------------------------------------------------------------|
| Belgium          | 11422068   | 11483000   | 11904000   | 65.2 | 55.0 | 75.0 | 100.0 | 88.9 | Same number of stroke centres/ stroke units may still be adequate in 2030                                                                       |
| Benin            | 11485048   | 11801000   | 15672000   | 7.7  | 0.0  | 25.0 | 0.0   | 44.4 | Need to implement stroke centres and acute care in the country                                                                                  |
| Bolivia          | 11353142   | 11513000   | 13240000   | 7.7  | 0.0  | 25.0 | 0.0   | 44.4 | Need to implement stroke centres and acute care in the country                                                                                  |
| Brazil           | 209469333  | 211050000  | 223852000  | 30.9 | 17.5 | 29.2 | 58.3  | 75.5 | Need to implement guidelines and protocols, need to improve access to acute treatments and increase the number of stroke centres in the country |
| Bulgaria         | 7024216    | 6970000    | 6338000    | 71.9 | 50.0 | 87.5 | 100.0 | 77.8 | Same number of stroke centres/ stroke units may still be adequate in 2030                                                                       |
| Burkina Faso     | 19751535   | 20321000   | 27404000   | 2.5  | 0.0  | 0.0  | 0.0   | 22.2 | Need to implement stroke centres and acute care in the country                                                                                  |
| Cameroon         | 25216237   | 25876000   | 33766000   | 20.1 | 0.0  | 25.0 | 100.0 | 55.6 | Only 1 hospital in the survey, need to implement protocols, stroke centres and acute care in the country                                        |
| Canada           | 37058856   | 37375000   | 40352000   | 18.5 | 0.0  | 0.0  | 100.0 | 66.7 | Only 1 hospital represented in the survey, same number of stroke centres/ stroke units may still be adequate in 2030                            |
| Chile            | 18729160   | 18952000   | 19458000   | 63.5 | 46.7 | 75.0 | 100.0 | 81.5 | Same number of stroke centres/ stroke units may still be adequate in 2030                                                                       |
| China            | 1392730000 | 1397295000 | 1416292000 | 53.6 | 52.0 | 75.0 | 100.0 | 77.8 | Same number of stroke centres/ stroke units may still be adequate in 2030                                                                       |
| Colombia         | 49648685   | 50339000   | 53417000   | 67.0 | 60.0 | 75.0 | 100.0 | 72.2 | Only 3 hospitals represented, need to increase the number of stroke centres and to increase the implementation of acute stroke treatments       |
| Congo, Dem. Rep. | 84068091   | 86791000   | 120047000  | 8.9  | 0.0  | 0.0  | 0.0   | 22.2 | Need to implement stroke centres and acute care in the country                                                                                  |

|                  |           |           |           |      |      |       |       |      |                                                                                                                                                                           |
|------------------|-----------|-----------|-----------|------|------|-------|-------|------|---------------------------------------------------------------------------------------------------------------------------------------------------------------------------|
| Costa Rica       | 4999441   | 5048000   | 5468000   | 44.7 | 33.3 | 66.7  | 66.7  | 81.5 | Need to increase the number of stroke centres and the implementation of acute stroke treatments                                                                           |
| Croatia          | 4089400   | 4071000   | 3864000   | 60.7 | 60.0 | 75.0  | 100.0 | 75.8 | Same number of stroke centres/ stroke units may still be adequate in 2030                                                                                                 |
| Czech Republic   | 10625695  | 10629000  | 10491000  | 42.9 | 20.0 | 62.5  | 100.0 | 88.9 | Same number of stroke centres/ stroke units may still be adequate in 2030                                                                                                 |
| Denmark          | 5797446   | 5818000   | 6047000   | 79.9 | 80.0 | 100.0 | 100.0 | 94.4 | Same number of stroke centres/ stroke units may still be adequate in 2030                                                                                                 |
| Egypt, Arab Rep. | 98423595  | 100388000 | 120832000 | 38.7 | 20.0 | 33.3  | 100.0 | 81.5 | Same number of stroke centres/ stroke units may still be adequate in 2030                                                                                                 |
| Estonia          | 1320884   | 1317000   | 1265000   | 74.6 | 80.0 | 100.0 | 100.0 | 77.8 | Same number of stroke centres/ stroke units may still be adequate in 2030                                                                                                 |
| Ethiopia         | 109224559 | 112079000 | 144944000 | 27.1 | 12.0 | 10.0  | 20.0  | 31.1 | Need to implement stroke centres and acute care in the country                                                                                                            |
| France           | 66987244  | 67211000  | 69509000  | 31.5 | 16.0 | 30.0  | 100.0 | 88.9 | Need to implement guidelines and protocols, need to improve acute treatments and increase the number of stroke centres in the country                                     |
| Georgia          | 3731000   | 3721000   | 3562000   | 73.5 | 60.0 | 100.0 | 100.0 | 33.3 | Only 1 hospital represented, need to implement basic acute stroke care                                                                                                    |
| Germany          | 82927922  | 82806000  | 81520000  | 48.2 | 40.0 | 56.3  | 100.0 | 88.9 | Same number of stroke centres/ stroke units may still be adequate in 2030                                                                                                 |
| Ghana            | 29767108  | 30418000  | 37833000  | 48.3 | 40.0 | 25.0  | 50.0  | 33.3 | Need to implement stroke centres and acute care in the country                                                                                                            |
| Greece           | 10727668  | 10696000  | 10355000  | 73.1 | 60.0 | 100.0 | 100.0 | 55.6 | Same number of stroke centres/ stroke units may still be adequate in 2030                                                                                                 |
| Honduras         | 9587522   | 9746000   | 11449000  | 81.3 | 40.0 | 100.0 | 100.0 | 77.8 | Only 1 hospital represented in the survey, need to follow guidelines, implement protocols and the country needs to implement stroke centres and acute care in the country |

|                    |            |            |            |      |       |       |       |       |                                                                                                                                                         |
|--------------------|------------|------------|------------|------|-------|-------|-------|-------|---------------------------------------------------------------------------------------------------------------------------------------------------------|
| Hong Kong          | 7451000    | 7508000    | 8024000    | 86.4 | 100.0 | 75.0  | 100.0 | 100.0 | Same number of strokes centres/ stroke units may still be adequate in 2030                                                                              |
| Hungary            | 9768785    | 9732000    | 9292000    | 63.7 | 60.0  | 100.0 | 100.0 | 66.7  | Same number of stroke centres/ stroke units may still be adequate in 2030                                                                               |
| India              | 1352617328 | 1366418000 | 1503642000 | 37.4 | 30.0  | 45.3  | 56.3  | 68.1  | Need to implement guidelines and protocols, need to improve acute treatments and increase the number of stroke centres in the country                   |
| Iran, Islamic Rep. | 81800269   | 82914000   | 92664000   | 81.5 | 80.0  | 100.0 | 100.0 | 88.9  | Only 1 hospital represented with good structure. The country needs to increase the number of stroke centres and the implementation of stroke treatments |
| Ireland            | 4853506    | 4893000    | 5255000    | 64.0 | 40.0  | 100.0 | 100.0 | 88.9  | Only 1 hospital represented in the survey. The country needs to increase the number of stroke centres/stroke units and acute stroke treatments          |
| Israel             | 8883800    | 9018000    | 10471000   | 62.1 | 80.0  | 100.0 | 0.0   | 44.4  | Only 1 hospital represented. stroke centres/ stroke units may still be adequate in 2030                                                                 |
| Italy              | 60431283   | 60340000   | 59196000   | 62.3 | 60.0  | 81.3  | 100.0 | 63.9  | Same number of stroke centres/ stroke units may still be adequate in 2030                                                                               |
| Japan              | 126529100  | 126097000  | 120095000  | 39.2 | 30.0  | 37.5  | 100.0 | 66.7  | Only 1 hospital represented. The country needs to increase access to acute treatments and increase the number of stroke centres in the country          |
| Kazakhstan         | 18276499   | 18469000   | 20165000   | 44.8 | 40.0  | 57.5  | 80.0  | 68.9  | Need to implement guidelines and protocols. Same number of stroke centres/ stroke units may still be adequate in 2030                                   |
| Kenya              | 51393010   | 52574000   | 66450000   | 12.3 | 0.0   | 0.0   | 100.0 | 11.1  | Need to implement stroke centres and acute care in the country                                                                                          |
| Korea, Rep.        | 51635256   | 51782000   | 52975000   | 71.8 | 66.7  | 69.4  | 100.0 | 92.6  | Same number of stroke centres/ stroke units may still be adequate in 2030                                                                               |
| Kyrgyz Republic    | 6315800    | 6404000    | 7218000    | 50.7 | 40.0  | 50.0  | 0.0   | 11.1  | Need to implement stroke centres and acute care in the country                                                                                          |

|                 |           |           |           |      |      |       |       |       |                                                                                                                                              |
|-----------------|-----------|-----------|-----------|------|------|-------|-------|-------|----------------------------------------------------------------------------------------------------------------------------------------------|
| Latvia          | 1926542   | 1916000   | 1796000   | 77.6 | 75.0 | 93.8  | 100.0 | 72.2  | Same number of stroke centres/ stroke units may still be adequate in 2030                                                                    |
| Lebanon         | 6848925   | 6856000   | 6195000   | 18.5 | 0.0  | 0.0   | 100.0 | 66.7  | Only 1 hospital represented. Need to increase the number of stroke centres and to implement acute care treatments                            |
| Malaysia        | 31528585  | 31950000  | 36095000  | 41.5 | 42.5 | 46.9  | 37.5  | 37.5  | Need to implement guidelines and protocols, to increase access to acute treatments and number of stroke centres in the country               |
| Mexico          | 126190788 | 127576000 | 140876000 | 52.7 | 30.0 | 62.5  | 100.0 | 77.8  | Need to implement guidelines and protocols, to increase access to acute treatments and number of stroke centres in the country               |
| Moldova         | 3545883   | 3536000   | 3368000   | 57.0 | 65.0 | 53.1  | 50.0  | 48.6  | Need to increase access to acute treatments and the number of stroke centres in the country                                                  |
| Morocco         | 36029138  | 36472000  | 40887000  | 31.6 | 13.3 | 33.3  | 100.0 | 63.0  | Need to increase access to acute treatments and increase the number of stroke centres in the country                                         |
| Nepal           | 28087871  | 28609000  | 33390000  | 40.3 | 15.0 | 37.5  | 25.0  | 47.2  | Need to implement stroke centres and acute care in the country                                                                               |
| New Zealand     | 4885500   | 4929000   | 5342000   | 72.9 | 73.3 | 100.0 | 100.0 | 88.9  | same number of stroke centres/ stroke units may still be adequate in 2030                                                                    |
| Nigeria         | 195874740 | 200964000 | 262977000 | 19.4 | 10.0 | 33.3  | 16.7  | 38.9  | Need to implement protocols, guidelines, to increase access to acute treatments and increase the number of stroke centres in the country     |
| North Macedonia | 2082958   | 2083000   | 2051000   | 52.6 | 40.0 | 75.0  | 100.0 | 44.4  | Only 1 hospital represented in the survey. The country needs to increase the number of stroke centres and to implement acute care treatments |
| Norway          | 5314336   | 5369000   | 5854000   | 59.8 | 46.7 | 66.7  | 100.0 | 100.0 | Same number of stroke centres/ stroke units may still be adequate in 2030                                                                    |
| Pakistan        | 212215030 | 216565000 | 262959000 | 41.0 | 0.0  | 100.0 | 0.0   | 44.4  | Need to implement protocols, guidelines, to increase access to acute treatments and increase the number of stroke centres in the country     |

|                    |           |           |           |      |       |       |       |      |                                                                                                                                            |
|--------------------|-----------|-----------|-----------|------|-------|-------|-------|------|--------------------------------------------------------------------------------------------------------------------------------------------|
| Panama             | 4176873   | 4246000   | 4928000   | 85.3 | 100.0 | 100.0 | 100.0 | 66.7 | Same number of stroke centres/ stroke units may still be adequate in 2030                                                                  |
| Papua New Guinea   | 8606316   | 8776000   | 10709000  | 18.8 | 0.0   | 25.0  | 100.0 | 44.4 | Need to implement protocols, guidelines, to increase access to acute treatments and increase the number of stroke centres in the country   |
| Paraguay           | 6956071   | 7045000   | 7950000   | 67.2 | 80.0  | 100.0 | 100.0 | 77.8 | Only 1 hospital represented with good resources, the country needs to implement acute treatments and increase the number of stroke centres |
| Peru               | 31989256  | 32510000  | 36031000  | 74.8 | 80.0  | 100.0 | 100.0 | 22.2 | Only 1 hospital represented, the country needs to implement acute treatments and increase the number of stroke centres                     |
| Poland             | 37978548  | 37895000  | 36474000  | 71.2 | 60.0  | 100.0 | 100.0 | 66.7 | Same number of stroke centres/ stroke units may still be adequate in 2030                                                                  |
| Portugal           | 10281762  | 10237000  | 9832000   | 40.6 | 32.0  | 42.5  | 90.0  | 74.4 | Need to implement protocols, guidelines, same number of stroke centres/ stroke units may still be adequate in 2030                         |
| Russian Federation | 144478050 | 144369000 | 140912000 | 74.2 | 80.0  | 75.0  | 100.0 | 44.4 | Probably the same number of stroke centres/ stroke units may still be adequate in 2030                                                     |
| Rwanda             | 12301939  | 12627000  | 16234000  | 9.6  | 0.0   | 0.0   | 0.0   | 11.1 | Need to implement acute treatments and stroke centres                                                                                      |
| Serbia             | 6982084   | 6955000   | 6625000   | 78.7 | 66.7  | 95.8  | 100.0 | 81.5 | Same number of stroke centres/ stroke units may still be adequate in 2030                                                                  |
| Seychelles         | 96762     | 97000     | 99000     | 19.6 | 10.0  | 25.0  | 0.0   | 33.3 | Need to implement acute treatments and stroke centres                                                                                      |
| Singapore          | 5638676   | 5710000   | 6157000   | 38.0 | 20.0  | 40.0  | 80.0  | 80.0 | Need to implement protocols, guidelines, acute treatments and increase the number of stroke centres                                        |
| Slovak Republic    | 5447011   | 5448000   | 5377000   | 36.5 | 26.7  | 33.3  | 66.7  | 51.9 | Need to implement protocols and guidelines, to improve access to acute treatments and increase the number of stroke centres in the country |



|                      |           |           |           |      |      |       |       |      |                                                                                                                                                                |
|----------------------|-----------|-----------|-----------|------|------|-------|-------|------|----------------------------------------------------------------------------------------------------------------------------------------------------------------|
| South Africa         | 57779622  | 58558000  | 65956000  | 77.8 | 93.3 | 83.3  | 100.0 | 77.8 | Despite the high score of 2 out of 3 centres, the country needs to improve access to acute treatments and increase the number of stroke centres in the country |
| Sri Lanka            | 21670000  | 21757000  | 22234000  | 26.4 | 5.0  | 18.8  | 75.0  | 47.2 | Need to implement protocols and guidelines, to improve access to acute treatments and increase the number of stroke centres in the country                     |
| Sudan                | 41801533  | 42813000  | 55254000  | 29.7 | 0.0  | 25.0  | 100.0 | 27.8 | Need to implement protocols and guidelines, to improve access to acute treatments and increase the number of stroke centres in the country                     |
| Sweden               | 10183175  | 10251000  | 10933000  | 39.0 | 20.0 | 25.0  | 100.0 | 97.2 | Same number of stroke centres/ stroke units may still be adequate in 2030                                                                                      |
| Taiwan               | 23726460  | 23773876  | 24011258  | 60.5 | 53.3 | 66.7  | 100.0 | 88.9 | Probably the same number of stroke centres/ stroke units may still be adequate in 2030                                                                         |
| Thailand             | 69428524  | 69626000  | 70346000  | 87.7 | 93.3 | 100.0 | 100.0 | 92.6 | Same number of stroke centres/ stroke units may still be adequate in 2030                                                                                      |
| Turkey               | 82319724  | 83430000  | 89158000  | 70.4 | 63.8 | 81.3  | 93.8  | 79.2 | Probably the same number of stroke centres/ stroke units may still be adequate in 2030                                                                         |
| Uganda               | 42723139  | 44270000  | 59438000  | 35.3 | 0.0  | 75.0  | 0.0   | 33.3 | Need to implement stroke centres and acute care in the country                                                                                                 |
| Ukraine              | 44622516  | 44391000  | 41719000  | 60.1 | 35.0 | 81.3  | 100.0 | 77.8 | Need to implement protocols, guidelines, increase the number of stroke centres                                                                                 |
| United Arab Emirates | 9630959   | 9771000   | 10661000  | 1.2  | 0.0  | 0.0   | 0.0   | 11.1 | Need to implement stroke centres and acute care in the country                                                                                                 |
| United Kingdom       | 66488991  | 66856000  | 70277000  | 42.0 | 31.3 | 39.1  | 100.0 | 85.4 | Need to implement protocols, guidelines and increase access to acute stroke treatments                                                                         |
| United States        | 327167434 | 329534000 | 354448000 | 57.1 | 52.0 | 66.7  | 80.0  | 78.5 | same number of stroke centres/ stroke units may still be adequate in 2030                                                                                      |
| Uruguay              | 3449299   | 3462000   | 3569000   | 82.9 | 80.0 | 100.0 | 100.0 | 77.8 | Despite the high score of this single centre, the country needs to implement protocols and guidelines, increase access to acute stroke                         |

|         |           |           |           |      |      |       |       |      |                                                                                                                                   |
|---------|-----------|-----------|-----------|------|------|-------|-------|------|-----------------------------------------------------------------------------------------------------------------------------------|
| Vietnam | 95540395  | 96462000  | 104164000 | 63.0 | 60.0 | 100.0 | 100.0 | 77.8 | treatments and increase the number of stroke centres<br>Same number of stroke centres/ stroke units may still be adequate in 2030 |
| Wales   | 3,139,308 | 3,151,569 | 3,234,289 | 21.0 | 0.0  | 0.0   | 100.0 | 88.9 | Need to implement protocols, guidelines, increase access to acute stroke treatments and increase the number of stroke centres     |

\* Completed number of items answered (median) out of a total of 104.

Limitations with generalizability. Data used to generate table was collected in 2017 and details published<sup>2</sup>

Supplementary Table 14. Summary of barriers and facilitators to acute stroke care services

|                              | <b>Barrier</b>                                                                                                                                                                                                                                                                                                                              | <b>Facilitator</b>                                                                                                                                                                                                                                                                                                                                                     | <b>Recommendation</b>                                                                                                                                                                                                                                                                                      |
|------------------------------|---------------------------------------------------------------------------------------------------------------------------------------------------------------------------------------------------------------------------------------------------------------------------------------------------------------------------------------------|------------------------------------------------------------------------------------------------------------------------------------------------------------------------------------------------------------------------------------------------------------------------------------------------------------------------------------------------------------------------|------------------------------------------------------------------------------------------------------------------------------------------------------------------------------------------------------------------------------------------------------------------------------------------------------------|
| Service provision            | <ul style="list-style-type: none"> <li>• Inequalities in stroke care by geography or socioeconomic status</li> <li>• Government funding for stroke care does not cover all services</li> <li>• Lack of community awareness limits access to care</li> <li>• No national strategy or guidelines</li> </ul>                                   | <ul style="list-style-type: none"> <li>• Development and implementation of national stroke plans or guidelines Increasing evidence-base for new therapies drives investment and awareness of stroke</li> <li>• Training in stroke care increases capacity to deliver services</li> <li>• Collection of data on stroke care and outcomes drives improvements</li> </ul> | <ul style="list-style-type: none"> <li>• Create national plan for stroke with regional networks to increase access to care</li> <li>• Create structured, regular training for general physicians to increase capacity for stroke care</li> </ul>                                                           |
| Funding                      | <ul style="list-style-type: none"> <li>• Tension between public and private health care systems</li> <li>• Stroke is not a priority for governments</li> <li>• No universal health care decreases access to evidence-based care</li> </ul>                                                                                                  | <ul style="list-style-type: none"> <li>• Availability of services across public and private systems increased access across countries</li> <li>• Universal health care or low-cost services ensures access for more people</li> <li>• Data collection on stroke care provides mechanisms for funding through government</li> </ul>                                     | <ul style="list-style-type: none"> <li>• Collect data on stroke care and outcomes to lobby for funding to meet community needs</li> <li>• Lobby for universal health care or inclusion of evidence-based care in government-funded services</li> </ul>                                                     |
| Workforce                    | <ul style="list-style-type: none"> <li>• Few staff with stroke specific training</li> <li>• Remuneration in public compared to private sector</li> <li>• Brain drain from low and middle income countries</li> </ul>                                                                                                                        | <ul style="list-style-type: none"> <li>• Provision of training to a wide range of health professionals</li> <li>• Importance of nurses to provision of high-quality care</li> <li>• Motivated staff including through incentives, e.g., bonuses, research, awards</li> </ul>                                                                                           | <ul style="list-style-type: none"> <li>• Create plans for training and retaining staff in stroke including professional development and other incentives</li> </ul>                                                                                                                                        |
| Data and information systems | <ul style="list-style-type: none"> <li>• No funding for data collection</li> <li>• Lack of national strategy for collection of data</li> <li>• Data limited to acute care and short-term outcomes</li> <li>• Lack of interoperability between electronic medical record systems</li> </ul>                                                  | <ul style="list-style-type: none"> <li>• National or local registries collect stroke care data used for quality improvement including awards</li> <li>• Data are used to increase stroke awareness and advocacy</li> <li>• Existing systems can be used for collection in many settings, e.g., RES-Q or SITS</li> </ul>                                                | <ul style="list-style-type: none"> <li>• Develop and implement national data collection for key stroke care and outcomes</li> <li>• Use data to advocate for stroke and leverage funding</li> <li>• Work with IT specialists to increase interoperability of electronic medical records systems</li> </ul> |
| Technology                   | <ul style="list-style-type: none"> <li>• No formal infrastructure for telehealth</li> <li>• Electronic medical records only in some hospitals for some data</li> <li>• Lack of access to newer imaging modalities across countries</li> <li>• Desire for new technology, e.g., AI, mobile stroke units, robotics, but no funding</li> </ul> | <ul style="list-style-type: none"> <li>• Telehealth networks either formal through government or informal using free technology, e.g. What's App</li> <li>• Government investment in innovations, e.g., mobile stroke units, advanced imaging, robotics</li> <li>• Electronic medical records provide some data on stroke at most levels of hospital system</li> </ul> | <ul style="list-style-type: none"> <li>• Create national telehealth networks with funding for services provided</li> <li>• Increase evidence-base for mobile stroke units</li> <li>• Increase coverage of electronic medical records</li> </ul>                                                            |
| Governance                   | <ul style="list-style-type: none"> <li>• No national strategy for stroke care</li> <li>• Lack of political will to invest in stroke</li> </ul>                                                                                                                                                                                              | <ul style="list-style-type: none"> <li>• Development of national stroke strategy and/or guidelines</li> </ul>                                                                                                                                                                                                                                                          | <ul style="list-style-type: none"> <li>• Create a national strategy for stroke including management guidelines with 'living' models</li> </ul>                                                                                                                                                             |

- Under-developed professional networks for stroke
  - No accreditation for stroke care
  - Low community awareness of stroke
  - National professional networks for stroke with strong leadership with influence in government
  - Accreditation or certification of stroke care drives improvements
  - Increasing community and health professional awareness of stroke
  - Foster national professional organizations for stroke care and advocacy
  - Explore mechanisms to certify or accredit delivery of stroke care
-

Supplementary Table 15: Key evidence-based recommendations to improve acute stroke care worldwide

| Key recommendations                                                                                                                                                                                                                   | Source                                          | Level of evidence/<br>GRADE | Resources required for implementation                            | Political, legal, ethical, sociocultural and economic considerations and barriers for                                                                                                                                                  | Recommendation for contextualization and implementation through WSO Task Force on Stroke and implementation ecosystem                                                                                                                                                                                                                                            |
|---------------------------------------------------------------------------------------------------------------------------------------------------------------------------------------------------------------------------------------|-------------------------------------------------|-----------------------------|------------------------------------------------------------------|----------------------------------------------------------------------------------------------------------------------------------------------------------------------------------------------------------------------------------------|------------------------------------------------------------------------------------------------------------------------------------------------------------------------------------------------------------------------------------------------------------------------------------------------------------------------------------------------------------------|
| <b>For all stroke patients</b>                                                                                                                                                                                                        |                                                 |                             |                                                                  |                                                                                                                                                                                                                                        |                                                                                                                                                                                                                                                                                                                                                                  |
| Patients with an acute stroke should be admitted to hospital                                                                                                                                                                          | WSO Guideline and Action Plan <sup>15,281</sup> | Level A                     | Hospitals available (preferably stroke centres)                  | Some regions without hospitals                                                                                                                                                                                                         | Governments should map the country and build at least 1 hospital per region (ideally every 200-250 km, preferably a stroke centre). Online roadmap can help in the evaluation                                                                                                                                                                                    |
| All patients with suspected acute stroke should receive brain imaging evaluation on arrival to hospital (non-contrast CT – NCCT – or Magnetic Resonance - MRI)                                                                        | AHA Guideline for Acute Stroke <sup>282</sup>   | Level 1A <sup>4</sup>       | Availability of CT scan in hospitals                             | Lack of resources to equip more hospitals with NCCT scan                                                                                                                                                                               | Governments should map the country and implement at least 1 CT scan equipment every 200 km. Online roadmaps can help in the evaluation                                                                                                                                                                                                                           |
|                                                                                                                                                                                                                                       | Canadian Guidelines <sup>283</sup>              | Level A                     |                                                                  |                                                                                                                                                                                                                                        |                                                                                                                                                                                                                                                                                                                                                                  |
|                                                                                                                                                                                                                                       | ICH Guidelines<br>AHA/ASA <sup>276</sup>        | Level 1A                    |                                                                  |                                                                                                                                                                                                                                        |                                                                                                                                                                                                                                                                                                                                                                  |
| Patients with acute stroke or TIA admitted to a hospital should be treated by an interdisciplinary stroke team (at least a physician with training in stroke care, a nurse, physiotherapist and speech therapist)                     | Canadian Guidelines <sup>283</sup>              |                             | Interdisciplinary stroke team                                    | Lack of knowledge of health managers that interdisciplinary team is cost effective and improves the patient’s outcomes<br>Lack of training for the interdisciplinary team                                                              | WSO implementation ecosystem on Stroke commissioners to work together with the health managers to show the evidence about interdisciplinary stroke team<br>Educational teaching courses for the stroke team (online – World Stroke Academy) and face to face with local societies                                                                                |
|                                                                                                                                                                                                                                       | WSO Guideline and Action plan <sup>15</sup>     | Level A                     |                                                                  |                                                                                                                                                                                                                                        |                                                                                                                                                                                                                                                                                                                                                                  |
|                                                                                                                                                                                                                                       | Action plan for stroke in Europe <sup>11</sup>  | Level A<br>Level A          |                                                                  |                                                                                                                                                                                                                                        |                                                                                                                                                                                                                                                                                                                                                                  |
| Patients with acute stroke or TIA admitted to a hospital should be treated in a stroke unit, which is a specialized, geographically defined area dedicated to the management of stroke patients with an interdisciplinary stroke team | Canadian Guidelines <sup>283</sup>              |                             | Geographic area in the hospital<br>Interdisciplinary stroke team | Lack of space to create stroke units<br>Lack of resources<br>Lack of knowledge of health managers that interdisciplinary team is cost effective and improves the patient’s outcomes<br>Lack of training for the interdisciplinary team | WSO implementation ecosystem on Stroke commissioners to work together with health managers and local societies to show the evidence about stroke units and to create plans to organize them more than built new areas<br>Educational teaching courses for the stroke team members (online – World Stroke Academy) and face to face meetings with local societies |
|                                                                                                                                                                                                                                       | WSO Guideline and Action plan <sup>15</sup>     | Level A                     |                                                                  |                                                                                                                                                                                                                                        |                                                                                                                                                                                                                                                                                                                                                                  |
|                                                                                                                                                                                                                                       | Action plan for stroke in Europe <sup>11</sup>  | Level A                     |                                                                  |                                                                                                                                                                                                                                        |                                                                                                                                                                                                                                                                                                                                                                  |
|                                                                                                                                                                                                                                       | Declaration of Gramado <sup>32</sup>            | Level A                     |                                                                  |                                                                                                                                                                                                                                        |                                                                                                                                                                                                                                                                                                                                                                  |
| Patients should be evaluated and managed to prevent complications (early access to swallowing, nutrition and                                                                                                                          | Canadian Guidelines <sup>283</sup>              | Level A                     | Training for the stroke team                                     | Lack of knowledge of health professionals about the importance of these general actions                                                                                                                                                | Educational teaching courses for the stroke team (online – World Stroke Academy) and                                                                                                                                                                                                                                                                             |
|                                                                                                                                                                                                                                       | WSO Guideline and Action plan <sup>15</sup>     | Level A                     |                                                                  |                                                                                                                                                                                                                                        |                                                                                                                                                                                                                                                                                                                                                                  |

|                                                                                                                                                                                                                                                         |                                                                                                                                                                                   |                        |                                                                                                                         |                                                                                                                                                                                                                                              |                                                                                                                                                                                                                                                                                                                                                                                                                                                                   |
|---------------------------------------------------------------------------------------------------------------------------------------------------------------------------------------------------------------------------------------------------------|-----------------------------------------------------------------------------------------------------------------------------------------------------------------------------------|------------------------|-------------------------------------------------------------------------------------------------------------------------|----------------------------------------------------------------------------------------------------------------------------------------------------------------------------------------------------------------------------------------------|-------------------------------------------------------------------------------------------------------------------------------------------------------------------------------------------------------------------------------------------------------------------------------------------------------------------------------------------------------------------------------------------------------------------------------------------------------------------|
| hydration status, fever, glucose, oxygen saturation, blood pressure, deep vein thrombosis, skin ulcers)                                                                                                                                                 | Action plan for stroke in Europe <sup>11</sup><br>AHA Guidelines <sup>282</sup>                                                                                                   | Level A<br><br>Level A |                                                                                                                         | Lack of training for the interdisciplinary team                                                                                                                                                                                              | face to face with local societies/professionals                                                                                                                                                                                                                                                                                                                                                                                                                   |
| In remote regions without doctors with stroke expertise, telemedicine in community hospitals may help to provide acute stroke treatment, including thrombolysis.                                                                                        | AHA, <sup>282</sup> Canadian, <sup>283</sup> Action plan in Europe, <sup>11</sup> Declaration of Gramado <sup>32</sup>                                                            | Level IIa, B-R         | Tools for communication and image evaluation in real time<br>Stroke experts to give consultation 24h/day, 7 days a week | Lack of communication and image transfer tools<br>Low resources to pay the equipment and professionals                                                                                                                                       | WSO implementation ecosystem on Stroke commissioners to work together with health managers and hospitals to develop a network to increase the access to stroke treatment in areas without doctors with stroke expertise.                                                                                                                                                                                                                                          |
| Specific for Ischemic stroke/TIA                                                                                                                                                                                                                        |                                                                                                                                                                                   |                        |                                                                                                                         |                                                                                                                                                                                                                                              |                                                                                                                                                                                                                                                                                                                                                                                                                                                                   |
| Patients with TIA should be assessed in hospital or if not possible, in a specialized outpatient clinic to perform CT scan, evaluate stroke aetiology and immediately to start stroke prevention (within 48 hours from symptoms onset)                  | Canadian Guidelines <sup>283</sup><br>WSO Guideline and Action plan <sup>15</sup><br>Action plan for stroke in Europe <sup>11</sup>                                               | Level A<br><br>Level A | Training for health professionals<br>Organization of TIA acute assistance                                               | Lack of awareness of health professionals about the importance to evaluate TIA and minor stroke as a medical urgency<br>Lack of structure for a fast evaluation of AIT aetiology and prevention treatment initiation                         | WSO implementation ecosystem on Stroke commissioners to develop strategies and action plans for education of health professionals to treat TIA as a medical urgency and to educate them with the best prevention strategies starting immediately after symptoms onset.                                                                                                                                                                                            |
| Patients with ischemic stroke should be evaluated for IV thrombolysis with tPA up to 4,5 hours of symptoms onset                                                                                                                                        | AHA, <sup>282</sup> Canadian Guidelines, <sup>283</sup> WSO, <sup>15</sup> Action plan in Europe. <sup>11</sup> Declaration of Gramado <sup>32</sup> ESO Guideline <sup>284</sup> | Level 1A               | Availability of tPA;<br>Training for stroke professionals;<br>Organization of pathways for fast treatment               | Lack of knowledge of health managers about the benefit and cost-effectiveness of the thrombolytic treatment<br>lack of trained doctors and interdisciplinary team<br>lack of thrombolytic medication in some countries<br>cost of medication | WSO implementation ecosystem on Stroke commissioners to work together with health managers and local societies to show the evidence about IV thrombolysis and to create plans to implement treatment; teaching courses; telemedicine is an effective and cost-effective tool to help the implementation in areas without stroke expertise doctors. <sup>78,79</sup><br><br>Governments should discuss with companies to ensure affordable thrombolytic medication |
| Ischemic stroke patients should be given acetylsalicylic acid (ASA) as soon as possible within 48 hours from symptom onset after brain imaging has excluded intracranial haemorrhage. Thrombolysed patients should receive ASA 24 hours after treatment | AHA, <sup>282</sup> Canadian Guidelines, <sup>283</sup> WSO, <sup>15</sup> Action plan in Europe. <sup>11</sup>                                                                   | Level 1A               | Health professional education                                                                                           | Lack of medical education                                                                                                                                                                                                                    | Educational teaching courses for the stroke team (online – World Stroke Academy) and face to face with local societies/professionals                                                                                                                                                                                                                                                                                                                              |
| Patients with minor stroke (NIHSS ≤ 3) who did not receive IV alteplase or high-risk TIA (ABCD2 score >4) of non-cardioembolic origin should receive dual antiplatelet                                                                                  | AHA, <sup>282</sup> Canadian Guidelines, <sup>283</sup>                                                                                                                           | Level 1A<br>Level 1A   | Training for the stroke team                                                                                            | Lack of medical education                                                                                                                                                                                                                    | Educational teaching courses for the stroke team (online – World Stroke Academy) and                                                                                                                                                                                                                                                                                                                                                                              |

|                                                                                                                                                                                                                                                                                                                                                                                                                                                                                                                                                                                                                                                                                                                                                                                             |                                                                                                                             |                          |                                                                                                                                                                               |                                                                                                                                                                                                                                                             |                                                                                                                                                                                                                                                                                                                                           |
|---------------------------------------------------------------------------------------------------------------------------------------------------------------------------------------------------------------------------------------------------------------------------------------------------------------------------------------------------------------------------------------------------------------------------------------------------------------------------------------------------------------------------------------------------------------------------------------------------------------------------------------------------------------------------------------------------------------------------------------------------------------------------------------------|-----------------------------------------------------------------------------------------------------------------------------|--------------------------|-------------------------------------------------------------------------------------------------------------------------------------------------------------------------------|-------------------------------------------------------------------------------------------------------------------------------------------------------------------------------------------------------------------------------------------------------------|-------------------------------------------------------------------------------------------------------------------------------------------------------------------------------------------------------------------------------------------------------------------------------------------------------------------------------------------|
| therapy (DAPT) up to 24 hours of symptoms onset with aspirin plus clopidogrel (loading dose 300 or 600 mg followed by 75 mg/day). DAPT should continue for 21 to 30 days. After, should continue antiplatelet monotherapy indefinitely                                                                                                                                                                                                                                                                                                                                                                                                                                                                                                                                                      |                                                                                                                             |                          |                                                                                                                                                                               |                                                                                                                                                                                                                                                             | face to face with local societies/professionals                                                                                                                                                                                                                                                                                           |
| Patients with Large Vessel Occlusion (LVO) with symptoms up to 24 hours should be evaluated for mechanical thrombectomy (MT) in comprehensive stroke centres (Advanced as the WSO Roadmap classification).                                                                                                                                                                                                                                                                                                                                                                                                                                                                                                                                                                                  | AHA, <sup>282</sup><br>Canadian<br>Guidelines, <sup>283</sup> WSO, <sup>15</sup><br>Action plan in<br>Europe. <sup>11</sup> | Level 1A                 | Comprehensive stroke centres (advanced)<br>Neurointerventionalists trained available 24h, 7 days a week,<br>anaesthesiologist,<br>Access to Angiography units, devices for MT | Lack of knowledge of health managers about the benefit of the treatment<br>lack of structure in hospitals (usually LIC without any advanced hospital)<br>lack of resources to pay the professionals and devices<br>lack of trained neuro-interventionalists | WSO implementation ecosystem on Stroke commissioners to work together with health managers and local societies to show the evidence already available and to create plans to implement treatment, teaching courses, hands-on in high volume centres. Governments should discuss with companies to ensure affordable devices and materials |
| Patients eligible for IV thrombolysis should receive IV thrombolysis even if MT is being considered.                                                                                                                                                                                                                                                                                                                                                                                                                                                                                                                                                                                                                                                                                        | AHA, <sup>282</sup><br>Canadian<br>Guidelines, <sup>283</sup> ESO<br>Guideline. <sup>284</sup>                              | Level 1A<br><br>Level 1A | Training for the stroke team                                                                                                                                                  | Lack of medical education                                                                                                                                                                                                                                   | Educational teaching courses for the stroke team (online – World Stroke Academy) and face to face with local societies/professionals                                                                                                                                                                                                      |
| Specific for intracerebral haemorrhage (ICH)                                                                                                                                                                                                                                                                                                                                                                                                                                                                                                                                                                                                                                                                                                                                                |                                                                                                                             |                          |                                                                                                                                                                               |                                                                                                                                                                                                                                                             |                                                                                                                                                                                                                                                                                                                                           |
| In patients with spontaneous ICH of mild to moderate severity presenting with SBP between 150 and 220 mmHg, acute lowering of SBP to a target of 140 mmHg (maintaining in the range of 130 to 150 mm Hg) is safe and may be reasonable for improving functional outcomes                                                                                                                                                                                                                                                                                                                                                                                                                                                                                                                    | AHA ICH <sup>276</sup>                                                                                                      | Level 1A                 | Training for the stroke team                                                                                                                                                  | Lack of medical education                                                                                                                                                                                                                                   | Educational teaching courses for the stroke team                                                                                                                                                                                                                                                                                          |
| In patients with spontaneous ICH presenting within 6 h of the onset of the event, the use of a care bundle protocol incorporating the early control of elevated blood pressure (SBP < 140 mm Hg within 1 h of the initiation of treatment) together with management algorithms for hyperglycaemia (achieving a glucose target of 6.1–7.8 mmol/L for patients without diabetes and 7.8–10.0 mmol/L for patients with diabetes as soon as possible after the initiation of treatment), pyrexia (achieving a body temperature of <37.5°C within 1 h of initiation), and the reversal of abnormal anticoagulation in those taking warfarin using fresh frozen plasma or prothrombin concentrate complex with the goal of reaching an international normalised ratio of less than 1.5 within 1 h | INTERACT <sub>3</sub> <sup>285</sup>                                                                                        | Level 1A                 | Training for the stroke team                                                                                                                                                  | Lack of medical education                                                                                                                                                                                                                                   | Educational teaching courses for the stroke team                                                                                                                                                                                                                                                                                          |

|                                                                                                                                                                                                                                                                                                                                                                                                                             |                        |                                                           |                                                                                                                                                                              |                                                                                                                                                                                                                                              |                                                                                                                                                                                                                                                                                                                |
|-----------------------------------------------------------------------------------------------------------------------------------------------------------------------------------------------------------------------------------------------------------------------------------------------------------------------------------------------------------------------------------------------------------------------------|------------------------|-----------------------------------------------------------|------------------------------------------------------------------------------------------------------------------------------------------------------------------------------|----------------------------------------------------------------------------------------------------------------------------------------------------------------------------------------------------------------------------------------------|----------------------------------------------------------------------------------------------------------------------------------------------------------------------------------------------------------------------------------------------------------------------------------------------------------------|
| of treatment. Maintaining these treatment targets for 7 days or until discharge results in an improved functional outcome at 6 months.                                                                                                                                                                                                                                                                                      |                        |                                                           |                                                                                                                                                                              |                                                                                                                                                                                                                                              |                                                                                                                                                                                                                                                                                                                |
| In patients with spontaneous ICH and clinical hydrocephalus, transfer to centres with neurosurgical capabilities for definitive hydrocephalus management with external ventricular derivation (EVD) placement and monitoring is recommended to reduce mortality                                                                                                                                                             | AHA ICH <sup>276</sup> | Level 1-BNR                                               | Training for the stroke team                                                                                                                                                 | Lack of medical education                                                                                                                                                                                                                    | Educational teaching courses for the stroke team                                                                                                                                                                                                                                                               |
| Intermittent pneumatic compression (IPC) starting on the day of diagnosis is recommended for deep venous thrombosis and pulmonary embolism prophylaxis                                                                                                                                                                                                                                                                      | AHA ICH <sup>276</sup> | Level 1-BR                                                | Training for the stroke team                                                                                                                                                 | Lack of medical education                                                                                                                                                                                                                    | Educational teaching courses for the stroke team                                                                                                                                                                                                                                                               |
| In patients with spontaneous ICH, impaired consciousness, and confirmed electrographic seizures, antiseizure drugs should be administered to reduce morbidity                                                                                                                                                                                                                                                               | AHA ICH <sup>276</sup> | Level 1-CLD                                               | Training for the stroke team                                                                                                                                                 | Lack of medical education                                                                                                                                                                                                                    | Educational teaching courses for the stroke team                                                                                                                                                                                                                                                               |
| In patients with clinical seizures antiseizure drugs should be administered                                                                                                                                                                                                                                                                                                                                                 | AHA ICH <sup>276</sup> | Level 1 CEO                                               | Training for the stroke team                                                                                                                                                 | Lack of medical education                                                                                                                                                                                                                    | Educational teaching courses for the stroke team                                                                                                                                                                                                                                                               |
| For patients with cerebellar ICH who are deteriorating neurologically, have brainstem compression and/or hydrocephalus from ventricular obstruction, or have cerebellar ICH volume $\geq 15$ mL, immediate surgical removal of the haemorrhage with or without EVD is recommended in preference to medical management alone to reduce mortality                                                                             | AHA ICH <sup>276</sup> | Level 1 BNR                                               | Training for the stroke team<br>Availability of operating room and neurosurgeon<br>24h, 7 days                                                                               | Lack of medical education<br>Unavailability of structure to the surgery (equipment and professional)                                                                                                                                         | Educational teaching courses for the stroke team. If unavailability of resources, the patient should be transferred to a hospital with neurosurgery<br>Plans to transfer these patients should be coordinated with health managers as regional protocol                                                        |
| ICH while anticoagulated:<br>-Acute reversal of anticoagulation using protein complex concentrate (PCC) more than fresh frozen plasma for reversal of vitamin K antagonists followed immediately by IV Vitamin K to avoid increased INR again.<br>- Idarucizumab for reversal of the thrombin inhibitor dabigatran<br><br>-Andexanet alfa for reversal of factor Xa inhibitors such as Rivaroxaban, Apixaban, and Edoxaban. | AHA ICH <sup>276</sup> | Level 1 BR<br>Level 1 CLD<br>Level 2a BNR<br>Level 2a BNR | Training for the stroke team<br>Availability of PCC<br>Training for the stroke team, availability of Idarucizumab<br>Training for the stroke team, availability of Andexanet | Lack of medical education<br>Lack of medication for anticoagulation reversal<br>Lack of medical education<br>Lack of medication for anticoagulation reversal<br>Lack of medical education<br>Lack of medication for anticoagulation reversal | Educational teaching courses for the stroke team.<br>Director of hospital and Health managers should provide medication for anticoagulation reversal<br><br>Educational teaching courses to the stroke team<br>Director of hospital and Health managers should provide medication for anticoagulation reversal |



| Specific for subarachnoid haemorrhage (SAH)                                                                                                                                                                                                                                                              |                            |              |                                                                                                      |                                           |                                                                                                                                                                                                                   |
|----------------------------------------------------------------------------------------------------------------------------------------------------------------------------------------------------------------------------------------------------------------------------------------------------------|----------------------------|--------------|------------------------------------------------------------------------------------------------------|-------------------------------------------|-------------------------------------------------------------------------------------------------------------------------------------------------------------------------------------------------------------------|
| Acute diagnostic workup should include non-contrast head CT, which, if nondiagnostic, should be followed by lumbar puncture                                                                                                                                                                              | AHA SAH <sup>286</sup>     | 1B           | Availability of CT scan and lumbar puncture material in the hospital                                 | Lack of resources to equip more hospitals | Governments should map the country and implement at least 1 CT scan equipment every 200 km. Online Roadmap can help in the evaluation                                                                             |
| CTA may be considered in the workup of aSAH. If an aneurysm is detected by CTA, this study may help guide the decision for type of aneurysm repair, but if CTA is inconclusive, Diagnostic subtraction angiography still recommended (except possibly in the instance of classic perimesencephalic aSAH) |                            | 2B, C        | Availability of CTA                                                                                  | Lack of resources to equip more hospitals | Governments should plan and implement at least 1 comprehensive (advanced) stroke centre to each 2 million inhabitants<br>Coordinated routes to transfer these patients in the first 24 hours should be organized. |
| The magnitude of blood pressure control to reduce the risk of rebleeding has not been established, but a decrease in systolic blood pressure to <160 mmHg is reasonable                                                                                                                                  | AHA SAH <sup>286,287</sup> | Level C, 2A, | Training for health professionals                                                                    | Lack of training                          | Educational teaching courses for the stroke team.                                                                                                                                                                 |
| Patients with SAH should start oral nimodipine to improve outcomes but not to decrease vasospasm                                                                                                                                                                                                         | AHA SAH <sup>286,287</sup> | Level 1A     | Training for health professionals                                                                    | Lack of training<br>Lack of nimodipine    | Educational teaching courses for the stroke team.<br>Health managers should ensure that essential medication is available                                                                                         |
| Surgical clipping or endovascular coiling of the ruptured aneurysm should be performed as early as feasible in the majority of patients to reduce the rate of rebleeding after aSAH                                                                                                                      | AHA SAH <sup>286,287</sup> | Level 1 B    | Availability of neurosurgeon or neurointerventionalists, availability of surgery room or angio-suite | Lack of equipment and professionals       | Educational teaching courses for neurosurgeon, neurointerventionalists<br>Comprehensive (advanced) stroke centre available in the region to transfer the patient                                                  |
| A neuroradiologist and a neurosurgeon should discuss the options for managing the culprit aneurysm (endovascular coiling or neurosurgical clipping), taking into account the patient's clinical condition, the characteristics of the aneurysm, and the amount and location of subarachnoid blood        | AHA SAH <sup>286,287</sup> | 1B           |                                                                                                      | Lack of training                          | Educational teaching courses to neurosurgeon, neurointerventionalist                                                                                                                                              |

**Supplementary Table 16: Estimated coverage and unmet needs for rehabilitation, according to country**

| Country Name | Population 2018 | Population 2019 | Projected Population 2030 | Estimated Coverage for rehabilitation services |           |               | Estimated Unmet Needs*                                                                                                                                                                   |
|--------------|-----------------|-----------------|---------------------------|------------------------------------------------|-----------|---------------|------------------------------------------------------------------------------------------------------------------------------------------------------------------------------------------|
|              |                 |                 |                           | In patient                                     | community | Section score |                                                                                                                                                                                          |
| Albania      | 2866376         | 2867000         | 2830000                   | 0                                              | 0         | 33.33         | Need to provide qualitative and high number of in-patient and out-patient facilities                                                                                                     |
| Argentina    | 44494502        | 44901000        | 49069000                  | 66.67                                          | 0         | 22.22         | Need to provide qualitative and high number of in-patient and out-patient facilities                                                                                                     |
| Armenia      | 2951776         | 2958000         | 2967000                   | 50                                             | 0         | 1             | Need to provide qualitative and high number of in-patient and out-patient facilities                                                                                                     |
| Aruba        | 105845          | 106000          | 110000                    | 0                                              | 0         | 0             | Need to provide qualitative and high number of in-patient and out-patient facilities                                                                                                     |
| Australia    | 24992369        | 25303000        | 28393000                  | 75                                             | 25        | 33.33         | Need to provide qualitative and high number of in-patient and out-patient facilities                                                                                                     |
| Austria      | 8847037         | 8865000         | 9017000                   | 100                                            | 50        | 55.56         | Need to provide qualitative and high number of in-patient and out-patient facilities                                                                                                     |
| Bangladesh   | 161356039       | 163046000       | 178994000                 | 50                                             | 0         | 5.56          | Same number of facilities may still be adequate in 2030.                                                                                                                                 |
| Belarus      | 9485386         | 9467000         | 9191000                   | 100                                            | 0         | 22.22         | Rigorous epidemiological surveillance for stroke to make these quantitative projections reliable<br>Need to provide qualitative and high number of in-patient and out-patient facilities |
| Belgium      | 11422068        | 11483000        | 11904000                  | 100                                            | 50        | 55.56         | Need to provide qualitative and high number of in-patient and out-patient facilities                                                                                                     |
| Benin        | 11485048        | 11801000        | 15672000                  | 100                                            | 0         | 22.22         | rigorous epidemiological surveillance for stroke to make these quantitative projections reliable                                                                                         |
| Bolivia      | 11353142        | 11513000        | 13240000                  | 100                                            | 0         | 11.11         | Need to provide qualitative and high number of in-patient and out-patient facilities                                                                                                     |
| Brazil       | 209469333       | 211050000       | 223852000                 | 87.5                                           | 8.33      | 21.3          | Rigorous epidemiological surveillance for stroke to make these quantitative projections reliable                                                                                         |
| Bulgaria     | 7024216         | 6970000         | 6338000                   | 100                                            | 50        | 55.56         | Need to provide qualitative and high number of in-patient and out-patient facilities                                                                                                     |
| Burkina Faso | 19751535        | 20321000        | 27404000                  | 0                                              | 0         | 0             | Need to provide qualitative and high number of in-patient and out-patient facilities                                                                                                     |
| Cameroon     | 25216237        | 25876000        | 33766000                  | 100                                            | 0         | 22.22         | Rigorous epidemiological surveillance for stroke to make these quantitative projections reliable                                                                                         |

|                  |            |            |            |     |       |       |                                                                                                                                                |
|------------------|------------|------------|------------|-----|-------|-------|------------------------------------------------------------------------------------------------------------------------------------------------|
| Canada           | 37058856   | 37375000   | 40352000   | 0   | 0     | 0     | Only one hospital completed the survey, and only 2 of 17 questions answered. This is unlikely to represent rehabilitation care in this region. |
| Chile            | 18729160   | 18952000   | 19458000   | 100 | 66.67 | 62.96 | Need to provide qualitative and high number of in-patient and out-patient facilities                                                           |
| China            | 1392730000 | 1397295000 | 1416292000 | 100 | 0     | 24.44 | Rigorous epidemiological surveillance for stroke to make these quantitative projections reliable                                               |
| Colombia         | 49648685   | 50339000   | 53417000   | 75  | 25    | 44.44 | Need to provide qualitative and high number of in-patient and out-patient facilities                                                           |
| Congo, Dem. Rep. | 84068091   | 86791000   | 120047000  | 100 | 0     | 11.11 | Rigorous epidemiological surveillance for stroke to make these quantitative projections reliable                                               |
| Costa Rica       | 4999441    | 5048000    | 5468000    | 100 | 0     | 29.63 | Need to provide qualitative and high number of in-patient and out-patient facilities                                                           |
| Croatia          | 4089400    | 4071000    | 3864000    | 100 | 36.36 | 44.44 | Need to provide qualitative and high number of in-patient and out-patient facilities                                                           |
| Czech Republic   | 10625695   | 10629000   | 10491000   | 100 | 0     | 27.78 | Need to provide qualitative and high number of in-patient and out-patient facilities                                                           |
| Denmark          | 5797446    | 5818000    | 6047000    | 100 | 0     | 33.33 | Need to provide qualitative and high number of in-patient and out-patient facilities                                                           |
| Egypt, Arab Rep. | 98423595   | 100388000  | 120832000  | 100 | 0     | 25.93 | Rigorous epidemiological surveillance for stroke to make these quantitative projections reliable                                               |
| Estonia          | 1320884    | 1317000    | 1265000    | 100 | 100   | 55.56 | Rigorous epidemiological surveillance for stroke to make these quantitative projections reliable                                               |
| Ethiopia         | 109224559  | 112079000  | 144944000  | 20  | 0     | 11.11 | Rigorous epidemiological surveillance for stroke to make these quantitative projections reliable                                               |
| France           | 66987244   | 67211000   | 69509000   | 100 | 0     | 26.67 | Need to provide qualitative and high number of in-patient and out-patient facilities                                                           |
| Georgia          | 3731000    | 3721000    | 3562000    | 100 | 0     | 33.33 | Same number of facilities may still be adequate in 2030.                                                                                       |
| Germany          | 82927922   | 82806000   | 81520000   | 100 | 25    | 36.11 | Same number of facilities may still be adequate in 2030                                                                                        |
| Ghana            | 29767108   | 30418000   | 37833000   | 100 | 0     | 38.89 | Need to provide qualitative and high number of in-patient and out-patient facilities                                                           |
| Greece           | 10727668   | 10696000   | 10355000,  | 100 | 0     | 44.44 | Need to provide qualitative and high number of in-patient and out-patient facilities                                                           |
| Honduras         | 9587522    | 9746000    | 11449000   | 100 | 100   | 100   | Need to provide more in-patient and out-patient facilities towards 2030                                                                        |

|                    |            |            |            |       |       |       |                                                                                                  |
|--------------------|------------|------------|------------|-------|-------|-------|--------------------------------------------------------------------------------------------------|
| Hong Kong          | 7451000    | 7508000    | 8024000    | 100   | 100   | 88.89 | Rigorous epidemiological surveillance for stroke to make these quantitative projections reliable |
| Hungary            | 9768785    | 9732000    | 9292000    | 100   | 0     | 22.22 | Same number of facilities may still be adequate in 2030                                          |
| India              | 1352617328 | 1366418000 | 1503642000 | 68.75 | 6.25  | 25    | Need to provide qualitative and high number of in-patient and out-patient facilities             |
| Iran, Islamic Rep. | 81800269   | 82914000   | 92664000   | 100   | 0     | 44.44 | Rigorous epidemiological surveillance for stroke to make these quantitative projections reliable |
| Ireland            | 4853506    | 4893000    | 5255000    | 100   | 0     | 22.22 | Need to provide qualitative and high number of in-patient and out-patient facilities             |
| Israel             | 8883800    | 9018000    | 10471000   | 100   | 0     | 44.44 | Need to provide qualitative and high number of in-patient and out-patient facilities             |
| Italy              | 60431283   | 60340000   | 59196000   | 100   | 0     | 41.67 | Need to provide qualitative and high number of in-patient and out-patient facilities             |
| Japan              | 126529100  | 126097000  | 120095000  | 100   | 0     | 16.67 | Same number of facilities may still be adequate in 2030                                          |
| Kazakhstan         | 18276499   | 18469000   | 20165000   | 100   | 0     | 28.89 | Rigorous epidemiological surveillance for stroke to make these quantitative projections reliable |
| Kenya              | 51393010   | 52574000   | 66450000   | 0     | 0     | 0     | Need to provide qualitative and high number of in-patient and out-patient facilities             |
| Korea, Rep.        | 51635256   | 51782000   | 52975000   | 100   | 11.11 | 48.15 | Same number of facilities may still be adequate in 2030                                          |
| Kyrgyz Republic    | 6315800    | 6404000    | 7218000    | 100   | 0     | 33.33 | Need to provide qualitative and high number of in-patient and out-patient facilities             |
| Latvia             | 1926542    | 1916000    | 1796000    | 100   | 75    | 50    | Same number of facilities may still be adequate in 2030                                          |
| Lebanon            | 6848925    | 6856000    | 6195000    | 0     | 0     | 0     | Need to provide qualitative and high number of in-patient and out-patient facilities             |
| Malaysia           | 31528585   | 31950000   | 36095000   | 75    | 37.5  | 40.3  | Need to provide qualitative and high number of in-patient and out-patient facilities             |
| Mexico             | 126190788  | 127576000  | 140876000  | 100   | 50    | 50    | Need to provide qualitative and high number of in-patient and out-patient facilities             |
| Moldova            | 3545883    | 3536000    | 3368000    | 87.5  | 12.5  | 33.33 | Same number of facilities may still be adequate in 2030                                          |
| Morocco            | 36029138   | 36472000   | 40887000   | 100   | 0     | 14.81 | Rigorous epidemiological surveillance for stroke to make these quantitative projections reliable |
| Nepal              | 28087871   | 28609000   | 33390000   | 75    | 25    | 31.94 | Need to provide qualitative and high number of in-patient and out-patient facilities             |
| New Zealand        | 4885500    | 4929000    | 5342000    | 100   | 33.33 | 55.56 | Need to provide qualitative and high number of in-patient and out-patient facilities             |

|                    |           |           |           |       |       |       |                                                                                                  |
|--------------------|-----------|-----------|-----------|-------|-------|-------|--------------------------------------------------------------------------------------------------|
| Nigeria            | 195874740 | 200964000 | 262977000 | 66.67 | 0     | 22.22 | Need to provide qualitative and high number of in-patient and out-patient facilities             |
| North Macedonia    | 2082958   | 2083000   | 2051000   | 100   | 0     | 22.22 | Rigorous epidemiological surveillance for stroke to make these quantitative projections reliable |
| Norway             | 5314336   | 5369000   | 5854000   | 100   | 33.33 | 51.85 | Same number of facilities may still be adequate in 2030                                          |
| Pakistan           | 212215030 | 216565000 | 262959000 | 100   | 0     | 44.44 | Rigorous epidemiological surveillance for stroke to make these quantitative projections reliable |
| Panama             | 4176873   | 4246000   | 4928000   | 100   | 0     | 44.44 | Need to provide qualitative and high number of in-patient and out-patient facilities             |
| Papua New Guinea   | 8606316   | 8776000   | 10709000  | 100   | 0     | 11.11 | Need to provide qualitative and high number of in-patient and out-patient facilities             |
| Paraguay           | 6956071   | 7045000   | 7950000   | 100   | 0     | 22.22 | Need to provide qualitative and high number of in-patient and out-patient facilities             |
| Peru               | 31989256  | 32510000  | 36031000  | 100   | 0     | 22.22 | Need to provide qualitative and high number of in-patient and out-patient facilities             |
| Poland             | 37978548  | 37895000  | 36474000  | 100   | 0     | 33.33 | Need to provide qualitative and high number of in-patient and out-patient facilities             |
| Portugal           | 10281762  | 10237000  | 9832000   | 90    | 10    | 30    | Rigorous epidemiological surveillance for stroke to make these quantitative projections reliable |
| Russian Federation | 144478050 | 144369000 | 140912000 | 100   | 0     | 38.89 | Need to provide qualitative and high number of in-patient and out-patient facilities             |
| Rwanda             | 12301939  | 12627000  | 16234000  | 100   | 0     | 44.4  | Need to provide qualitative and high number of in-patient and out-patient facilities             |
| Serbia             | 6982084   | 6955000   | 6625000   | 100   | 50    | 55.56 | Rigorous epidemiological surveillance for stroke to make these quantitative projections reliable |
| Seychelles         | 96762     | 97000     | 99000     | 50    | 0     | 16.67 | Need to provide qualitative and high number of in-patient and out-patient facilities             |
| Singapore          | 5638676   | 5710000   | 6157000   | 100   | 20    | 37.78 | Rigorous epidemiological surveillance for stroke to make these quantitative projections reliable |
| Slovak Republic    | 5447011   | 5448000   | 5377000   | 66.67 | 0     | 25.93 | Need to provide qualitative and high number of in-patient and out-patient facilities             |
| South Africa       | 57779622  | 58558000  | 65956000  | 100   | 33.33 | 70.37 | Need to provide qualitative and high number of in-patient and out-patient facilities             |
| Sri Lanka          | 21670000  | 21757000  | 22234000  | 50    | 0     | 5.56  | Need to provide qualitative and high number of in-patient and out-patient facilities             |

|                      |           |           |           |     |      |       |                                                                                                  |
|----------------------|-----------|-----------|-----------|-----|------|-------|--------------------------------------------------------------------------------------------------|
| Sudan                | 41801533  | 42813000  | 55254000  | 100 | 0    | 11.11 | Need to provide qualitative and high number of in-patient and out-patient facilities             |
| Sweden               | 10183175  | 10251000  | 10933000  | 100 | 25   | 33.33 | Rigorous epidemiological surveillance for stroke to make these quantitative projections reliable |
| Taiwan               | 23726460  | 23773876  | 24011258  | 100 | 50   | 55.56 | Rigorous epidemiological surveillance for stroke to make these quantitative projections reliable |
| Thailand             | 69428524  | 69626000  | 70346000  | 100 | 100  | 81.48 | Rigorous epidemiological surveillance for stroke to make these quantitative projections reliable |
| Turkey               | 82319724  | 83430000  | 89158000  | 100 | 37.5 | 48.61 | Rigorous epidemiological surveillance for stroke to make these quantitative projections reliable |
| Uganda               | 42723139  | 44270000  | 59438000  | 0   | 0    | 0     | Need to provide qualitative and high number of in-patient and out-patient facilities             |
| Ukraine              | 44622516  | 44391000  | 41719000  | 100 | 25   | 44.44 | Rigorous epidemiological surveillance for stroke to make these quantitative projections reliable |
| United Arab Emirates | 9630959   | 9771000   | 10661000  | 100 | 0    | 33.33 | Need to provide qualitative and high number of in-patient and out-patient facilities             |
| United Kingdom       | 66488991  | 66856000  | 70277000  | 100 | 25   | 37.5  | Rigorous epidemiological surveillance for stroke to make these quantitative projections reliable |
| United States        | 327167434 | 329534000 | 354448000 | 80  | 40   | 40.74 | Rigorous epidemiological surveillance for stroke to make these quantitative projections reliable |
| Uruguay              | 3449299   | 3462000   | 3569000,  | 100 | 0    | 44.44 | Need to provide qualitative and high number of in-patient and out-patient facilities             |
| Vietnam              | 95540395  | 96462000  | 104164000 | 100 | 0    | 44.44 | Need to provide qualitative and high number of in-patient and out-patient facilities             |
| Wales                | 3,139,308 | 3,151,569 | 3,234,289 | 100 | 0    | 11.11 | Need to provide qualitative and high number of in-patient and out-patient facilities             |

All data were obtained from the World Bank site (obtained from <https://data.worldbank.org/indicator/SP.POP.TOTL>), except for Taiwan (obtained from <https://population.un.org/wpp2019/Download/Standard/Population/>); DHS, Demographic Health Survey. Please note that for all the countries, there is a need for more rigorous epidemiological surveillance of stroke burden to make more reliable projections. Nevertheless, nearly all the countries need to provide qualitative and high number of in-patient and out-patient facilities with more units being needed according to projected population growth.

Limitations with generalizability. Data used to generate table was collected in 2017 and details published<sup>2</sup>

**Supplementary Table 17. Barriers and facilitators for improving stroke rehabilitation services**

|                             | <b>Barriers</b>                                                                                                                                                                                                                                                                                                                                           | <b>Facilitators</b>                                                                                                                                                                                                                                                                                                                      | <b>Recommendations</b>                                                                                                                                                                                                                                                                           |
|-----------------------------|-----------------------------------------------------------------------------------------------------------------------------------------------------------------------------------------------------------------------------------------------------------------------------------------------------------------------------------------------------------|------------------------------------------------------------------------------------------------------------------------------------------------------------------------------------------------------------------------------------------------------------------------------------------------------------------------------------------|--------------------------------------------------------------------------------------------------------------------------------------------------------------------------------------------------------------------------------------------------------------------------------------------------|
| <b>Workforce</b>            | <p>Gaps outside physiotherapy in psychology, speech pathology, occupational therapy</p> <p>Not enough staff and low staff retention with dependency on small numbers of people</p> <p>Lack of awareness of interdisciplinary stroke rehabilitation in recovery</p> <p>Lack of coordinated leadership</p>                                                  | <p>Growing awareness of the role of interdisciplinary stroke rehabilitation</p> <p>Availability of multidisciplinary care across several settings</p> <p>Professionalisation of allied health including stroke specialisation</p> <p>Communities of practice for allied health in stroke</p>                                             | <p>Ensure local stroke-specific training of all allied health specialties</p> <p>Consider task shifting to allied health assistants</p> <p>Create national plans to promote awareness of stroke rehabilitation</p> <p>Create regional communities of practice to support allied health staff</p> |
| <b>Service provision</b>    | <p>Inequality in access to stroke rehabilitation – geography, income, age</p> <p>Complexity of pathways</p> <p>Lack of interdisciplinary services, e.g., psychology, occupational therapy, speech pathology</p> <p>Funding for services too low or limited in scope</p> <p>Small number of individuals relied on to provide all services</p>              | <p>Patchwork of services across settings offer options for rehabilitation</p> <p>Better trained staff led to better evidence-based care</p> <p>Clinical guidelines, protocols or frameworks</p> <p>Motivated workforce focused on patient outcomes</p> <p>Raising awareness of rehabilitation after stroke across stakeholder groups</p> | <p>Use clinical guidelines to promote best practice care including all specialties</p> <p>Embed telerehabilitation to increase access to care across regions</p> <p>Lobby for increased funding for rehabilitation across settings and specialties</p>                                           |
| <b>Finance</b>              | <p>Universal health care covers limited range of services for a short time</p> <p>Services only accessible through a user pays system</p> <p>Funding models are complex</p> <p>Governments not prioritising stroke as a public health issue</p> <p>Stroke impacts on the person’s financial wellbeing affecting their family and their access to care</p> | <p>Universal health care provides safety net of some rehabilitation for most people</p> <p>Government funding supports some infrastructure in mostly large tertiary hospitals</p> <p>User pays services play an important role in providing access to rehabilitation</p>                                                                 | <p>Ensure all countries have universal health care</p> <p>Lobby for coverage of all allied health specialties across settings in government-funded services</p> <p>Ensure private health insurers fund evidence-based stroke rehabilitation</p>                                                  |
| <b>Data and information</b> | <p>Electronic medical records not standard across countries or settings</p> <p>Data on numbers of strokes collected at hospital level but not used for country-wide service planning</p> <p>Data available for in-patient rehabilitation in public system but not private system or community/home settings</p>                                           | <p>Individual hospitals collect rehabilitation data to use for quality improvement</p> <p>Electronic medical records becoming common but mostly for operational reasons</p> <p>Covid pandemic has shown power of data for decision making</p>                                                                                            | <p>Expand electronic medical records and include a range of settings</p> <p>Make data available at a national level for planning</p>                                                                                                                                                             |
| <b>Technology</b>           | <p>Technology for rehabilitation is expensive for devices and staffing</p>                                                                                                                                                                                                                                                                                | <p>Electronic data capture integrated into clinical care</p> <p>Innovative organizations are developing and implementing technology</p>                                                                                                                                                                                                  | <p>Ensure hospitals are equipped for telerehabilitation</p>                                                                                                                                                                                                                                      |

|                   |                                                                                                                                                                                                                                                                                                                                                                                                                                                                                                                                                                                                            |                                                                                                                                                                                                                                                                                                                                                                                                                                                                                                                                                                |                                                                                                                                                                                                                                                                                                               |
|-------------------|------------------------------------------------------------------------------------------------------------------------------------------------------------------------------------------------------------------------------------------------------------------------------------------------------------------------------------------------------------------------------------------------------------------------------------------------------------------------------------------------------------------------------------------------------------------------------------------------------------|----------------------------------------------------------------------------------------------------------------------------------------------------------------------------------------------------------------------------------------------------------------------------------------------------------------------------------------------------------------------------------------------------------------------------------------------------------------------------------------------------------------------------------------------------------------|---------------------------------------------------------------------------------------------------------------------------------------------------------------------------------------------------------------------------------------------------------------------------------------------------------------|
| <b>Governance</b> | <p>Not common to have advanced technology like robotics in rehabilitation services</p> <p>Lack of awareness and/or evidence for advanced technologies in rehabilitation</p> <p>Most hospitals not equipped to deliver telerehabilitation</p> <p>Complex governance over disciplines and settings</p> <p>Defining clinical excellence challenging due to range of specialities and patient needs</p> <p>Policy settings not amenable to changes in delivery of rehabilitation</p> <p>Governing bodies do not see stroke as priority</p> <p>Lack of regional collaboration/frameworks for rehabilitation</p> | <p>Covid pandemic forced the use of telerehabilitation</p> <p>Digital tools like smartphones can be used to deliver rehabilitation</p> <p>Non-government stroke organizations improve awareness and quality of rehabilitation</p> <p>Registration bodies for allied health including subspecialisation in stroke improves care</p> <p>Existing government structures provide oversight for clinical care</p> <p>Clinical guidelines improve the quality of rehabilitation care</p> <p>Individuals in government act as champions for stroke rehabilitation</p> | <p>Build evidence base for advanced technologies in rehabilitation</p> <p>Create transparent information about rehabilitation pathways across all settings for the community, health professionals and policy makers</p> <p>Create national stroke advocacy organizations to build capacity and awareness</p> |
|-------------------|------------------------------------------------------------------------------------------------------------------------------------------------------------------------------------------------------------------------------------------------------------------------------------------------------------------------------------------------------------------------------------------------------------------------------------------------------------------------------------------------------------------------------------------------------------------------------------------------------------|----------------------------------------------------------------------------------------------------------------------------------------------------------------------------------------------------------------------------------------------------------------------------------------------------------------------------------------------------------------------------------------------------------------------------------------------------------------------------------------------------------------------------------------------------------------|---------------------------------------------------------------------------------------------------------------------------------------------------------------------------------------------------------------------------------------------------------------------------------------------------------------|

---



**Supplementary Table 18: Survey on the implementation of WFNR stroke rehabilitation practice recommendations - participant characteristics and settings**

|                                           |                                      | Total (n, %) | HIC group (n, %) | LMIC group (n, %) | P (Chi <sup>2</sup> ) |
|-------------------------------------------|--------------------------------------|--------------|------------------|-------------------|-----------------------|
| Age group (years):                        | <30                                  | 6 (9%)       | 2 (11%)          | 4 (9%)            | 0.1152                |
|                                           | <40                                  | 18 (27%)     | 5 (26%)          | 13 (28%)          |                       |
|                                           | <50                                  | 22 (33%)     | 4 (21%)          | 18 (38%)          |                       |
|                                           | <60                                  | 12 (18%)     | 7 (37%)          | 5 (11%)           |                       |
|                                           | ≥60                                  | 8 (12%)      | 1 (5%)           | 7 (15%)           |                       |
| Sex                                       | Female                               | 36 (55%)     | 7 (37%)          | 29 (62%)          | 0.0663                |
| Education                                 | High school                          | 1 (2%)       | 1 (5%)           | 0                 | 0.0512                |
|                                           | Bachelor                             | 10 (15%)     | 1 (5%)           | 9 (20%)           |                       |
|                                           | Master                               | 13 (20%)     | 4 (21%)          | 9 (20%)           |                       |
|                                           | Medical Doctor                       | 20 (31%)     | 3 (16%)          | 17 (37%)          |                       |
|                                           | PhD                                  | 20 (31%)     | 9 (47%)          | 11 (24%)          |                       |
|                                           | Other                                | 1 (2%)       | 1 (5%)           | 0                 |                       |
| Profession                                | Medical Doctor                       | 38 (58%)     | 10 (53%)         | 28 (60%)          | 0.1997                |
|                                           | Nurse                                | 0            | 0                | 0                 |                       |
|                                           | Occupational Therapist               | 2 (3%)       | 0                | 2 (4%)            |                       |
|                                           | Psychologist                         | 1 (2%)       | 0                | 1 (2%)            |                       |
|                                           | Physiotherapist                      | 21 (32%)     | 7 (37%)          | 14 (30%)          |                       |
|                                           | Speech and Language Therapist        | 2 (3%)       | 0                | 2 (4%)            |                       |
|                                           | Other                                | 2 (3%)       | 2 (11%)          | 0                 |                       |
| Experience in neurorehabilitation (years) | 0                                    | 2 (3%)       | 0                | 2 (4%)            | 0.5674                |
|                                           | <2                                   | 3 (5%)       | 0                | 3 (6%)            |                       |
|                                           | <5                                   | 13 (20%)     | 5 (26%)          | 8 (17%)           |                       |
|                                           | <10                                  | 8 (12%)      | 3 (16%)          | 5 (11%)           |                       |
|                                           | ≥10                                  | 40 (61%)     | 11 (58%)         | 29 (62%)          |                       |
| Type of service                           | Acute care                           | 20 (30%)     | 6 (32%)          | 14 (30%)          | 0.0245                |
|                                           | Early rehabilitation                 | 6 (9%)       | 5 (26%)          | 1 (2%)            |                       |
|                                           | Inpatient rehabilitation             | 19 (29%)     | 6 (32%)          | 13 (28%)          |                       |
|                                           | Outpatient rehabilitation            | 16 (24%)     | 2 (11%)          | 14 (30%)          |                       |
|                                           | Single profession outpatient service | 2 (3%)       | 0                | 2 (4%)            |                       |
|                                           | Other                                | 3 (5%)       | 0                | 3 (6%)            |                       |
| Region (World Bank region classification) | East Asia & Pacific                  | 22 (33%)     | 2 (11%)          | 20 (43%)          | <0.0001               |

|                           |                                                   |          |          |          |
|---------------------------|---------------------------------------------------|----------|----------|----------|
|                           | Europe & Central Asia                             | 14 (21%) | 14 (74%) | 0        |
|                           | Latin America & Caribbean                         | 10 (15%) | 1 (5%)   | 9 (19%)  |
|                           | Middle East & North Africa                        | 6 (9%)   | 2 (11%)  | 4 (9%)   |
|                           | South Asia                                        | 4 (6%)   | 0        | 4 (9%)   |
|                           | Sub-Saharan Africa                                | 10 (15%) | 0        | 10 (21%) |
| World Bank country        | High income countries (HIC)                       | 19 (29%) |          |          |
| economical classification | Low and (lower and upper) middle income countries | 47 (71%) |          |          |

*Abbreviations: P (Chi<sup>2</sup>)* - P value for Chi<sup>2</sup> test when comparing distributions for HIC and LMIC respondents. *Note:* percentage is rounded for each category, thus total might deviate from 100%. Education: analysis based on entries provided by 65 respondents (1 missing).

Supplementary Table 19: Frequency of implementation of team oriented WFNR stroke rehabilitation practice recommendations

|                                                                                                                                                                                                                                                                                                                                                                                                                                                                                                                                                                                                                                                                                                                             |   | Total (n, %) | HIC group (n, %) | LMIC group (n, %) | P (Chi <sup>2</sup> ) |
|-----------------------------------------------------------------------------------------------------------------------------------------------------------------------------------------------------------------------------------------------------------------------------------------------------------------------------------------------------------------------------------------------------------------------------------------------------------------------------------------------------------------------------------------------------------------------------------------------------------------------------------------------------------------------------------------------------------------------------|---|--------------|------------------|-------------------|-----------------------|
| <b>REC 1 – Team (n=66)</b><br>If possible, stroke rehabilitation should be delivered by interdisciplinary teams with specific training and experience in the field.                                                                                                                                                                                                                                                                                                                                                                                                                                                                                                                                                         | A | 24 (36%)     | 10 (53%)         | 14 (30%)          | 0.0404                |
|                                                                                                                                                                                                                                                                                                                                                                                                                                                                                                                                                                                                                                                                                                                             | B | 25 (38%)     | 8 (42%)          | 17 (36%)          |                       |
|                                                                                                                                                                                                                                                                                                                                                                                                                                                                                                                                                                                                                                                                                                                             | C | 17 (26%)     | 1 (5%)           | 16 (34%)          |                       |
|                                                                                                                                                                                                                                                                                                                                                                                                                                                                                                                                                                                                                                                                                                                             | D | 0            | 0                | 0                 |                       |
| <b>REC 2 – Initiation (n=65)</b><br>Initiation: The early rehabilitation process after stroke should be initiated in stroke units.                                                                                                                                                                                                                                                                                                                                                                                                                                                                                                                                                                                          | A | 22 (34%)     | 10 (56%)         | 12 (26%)          | 0.1187                |
|                                                                                                                                                                                                                                                                                                                                                                                                                                                                                                                                                                                                                                                                                                                             | B | 29 (45%)     | 5 (28%)          | 24 (51%)          |                       |
|                                                                                                                                                                                                                                                                                                                                                                                                                                                                                                                                                                                                                                                                                                                             | C | 12 (18%)     | 3 (17%)          | 9 (19%)           |                       |
|                                                                                                                                                                                                                                                                                                                                                                                                                                                                                                                                                                                                                                                                                                                             | D | 2 (3%)       | 0                | 2 (4%)            |                       |
| <b>REC 3 – Continuation (n=65)</b><br>Since the rehabilitation process after stroke will rarely be complete when it is time to leave hospital, rehabilitation should be continued after discharge especially during the first year after stroke to reduce the risk of disability and may individually be needed at later stages.                                                                                                                                                                                                                                                                                                                                                                                            | A | 15 (23%)     | 2 (11%)          | 13 (28%)          | 0.0274                |
|                                                                                                                                                                                                                                                                                                                                                                                                                                                                                                                                                                                                                                                                                                                             | B | 37 (57%)     | 15 (83%)         | 22 (47%)          |                       |
|                                                                                                                                                                                                                                                                                                                                                                                                                                                                                                                                                                                                                                                                                                                             | C | 13 (20%)     | 1 (6%)           | 12 (26%)          |                       |
|                                                                                                                                                                                                                                                                                                                                                                                                                                                                                                                                                                                                                                                                                                                             | D | 0            | 0                | 0                 |                       |
| <b>REC 4 – Integration (n=65)</b><br>For delivering high-quality healthcare for stroke survivors, the integration (in contrast with fragmentation) of care providers (e.g., specialists, general practitioners and other healthcare providers such as pharmacists, nurses, psychologists, physiotherapists) and close coordination (multidisciplinary care) of their activities across levels of care and multiple sites is warranted, all of which can be optimally embedded within a system that promotes patient empowerment.                                                                                                                                                                                            | A | 14 (22%)     | 3 (17%)          | 11 (23%)          | 0.5546                |
|                                                                                                                                                                                                                                                                                                                                                                                                                                                                                                                                                                                                                                                                                                                             | B | 24 (36%)     | 9 (50%)          | 15 (32%)          |                       |
|                                                                                                                                                                                                                                                                                                                                                                                                                                                                                                                                                                                                                                                                                                                             | C | 26 (40%)     | 6 (33%)          | 20 (43%)          |                       |
|                                                                                                                                                                                                                                                                                                                                                                                                                                                                                                                                                                                                                                                                                                                             | D | 1 (2%)       | 0                | 1 (2%)            |                       |
| <b>REC 5 – Action planning (n=64)</b><br>Heightened attention should be paid to evaluate team processes related to assessing/reporting of clinical findings and to goal setting and action planning processes. This includes to review the structure of team meetings, encourage the use of standardized measurement tools and assessments for clinical status and progress monitoring and the explicit method used for goal setting and action planning.                                                                                                                                                                                                                                                                   | A | 19 (30%)     | 7 (41%)          | 12 (26%)          | 0.4913                |
|                                                                                                                                                                                                                                                                                                                                                                                                                                                                                                                                                                                                                                                                                                                             | B | 19 (30%)     | 4 (24%)          | 15 (32%)          |                       |
|                                                                                                                                                                                                                                                                                                                                                                                                                                                                                                                                                                                                                                                                                                                             | C | 23 (36%)     | 6 (35%)          | 17 (36%)          |                       |
|                                                                                                                                                                                                                                                                                                                                                                                                                                                                                                                                                                                                                                                                                                                             | D | 3 (5%)       | 0                | 3 (6%)            |                       |
| <b>REC 6 – ICF (n=65)</b><br>All domains, including the body functions and structures (impairment), the activity and participation as well as the environmental factors domain of the ICF, can be used as a common language for professionals when setting goals in a semi-structured, ‘guided’ manner. Using the main ICF activity and participation domain as broad goal categories will prevent the missing of important goal areas, such as interactions and relations and social and civil life.                                                                                                                                                                                                                       | A | 11 (17%)     | 3 (17%)          | 8 (17%)           | 0.5259                |
|                                                                                                                                                                                                                                                                                                                                                                                                                                                                                                                                                                                                                                                                                                                             | B | 28 (43%)     | 10 (56%)         | 18 (38%)          |                       |
|                                                                                                                                                                                                                                                                                                                                                                                                                                                                                                                                                                                                                                                                                                                             | C | 24 (37%)     | 5 (28%)          | 19 (40%)          |                       |
|                                                                                                                                                                                                                                                                                                                                                                                                                                                                                                                                                                                                                                                                                                                             | D | 2 (3%)       | 0                | 2 (4%)            |                       |
| <b>REC 7 – GOALS (n=65)</b><br>Heightened attention can be paid to the goal syntax (starting with a verb, denominating a task, followed by modifiers, denominating the circumstances to accomplish the task). Patient’s perceptions/appraisal of goal importance, goal difficulty, self-efficacy and emotional stability can be checked, as they will mainly impact on individual goal choice and ranking and how to avoid goal conflicts. Evaluation of goal achievement (appraisal and feedback) can be used as a distinct and important intervention aiming to enhance self-efficacy and set the basis for (guided) self-management, marking the transition from ‘therapy’ (receptive) to ‘training’ (active, self-set). | A | 17 (26%)     | 3 (17%)          | 14 (30%)          | 0.3642                |
|                                                                                                                                                                                                                                                                                                                                                                                                                                                                                                                                                                                                                                                                                                                             | B | 27 (42%)     | 8 (44%)          | 19 (40%)          |                       |
|                                                                                                                                                                                                                                                                                                                                                                                                                                                                                                                                                                                                                                                                                                                             | C | 18 (28%)     | 7 (39%)          | 11 (23%)          |                       |
|                                                                                                                                                                                                                                                                                                                                                                                                                                                                                                                                                                                                                                                                                                                             | D | 3 (5%)       | 0                | 3 (6%)            |                       |

*Abbreviations: P (Chi<sup>2</sup>)* - P value for Chi<sup>2</sup> test when comparing distributions for HIC and LMIC respondents. *Levels of implementation:* A: Can regularly be applied as indicated, B: Can be applied regularly, but less than indicated, C: Can be applied, but only to a limited extent / much less than indicated, D: Cannot be applied. *Note:* percentage is rounded for each category, thus total might deviate from 100%.

**Supplementary Table 20. Key Recommendations based on National Stroke Guidelines and WFNR recommendations to improve stroke rehabilitation services worldwide**

| <b>KEY RECOMMENDATIONS</b><br>(Criteria: Class I and III and IIa A or B, IIbA recommendations only from best Guidelines reviewed based on COUNCIL Criteria)                                                                                                                                                                                                                                                                                                               | Source                  | level of evidence/<br>GRADE                                | Resources required for<br>implementation                                                                                                                                                                               | Barriers and Facilitators for<br>implementation                                                                                                                                                                                                                                                                                                                                                                                                                                        | Pragmatic solutions and<br>recommendation for<br>contextualization and<br>implementation through WSO<br>implementation ecosystem on<br>Stroke                                                                                                               |
|---------------------------------------------------------------------------------------------------------------------------------------------------------------------------------------------------------------------------------------------------------------------------------------------------------------------------------------------------------------------------------------------------------------------------------------------------------------------------|-------------------------|------------------------------------------------------------|------------------------------------------------------------------------------------------------------------------------------------------------------------------------------------------------------------------------|----------------------------------------------------------------------------------------------------------------------------------------------------------------------------------------------------------------------------------------------------------------------------------------------------------------------------------------------------------------------------------------------------------------------------------------------------------------------------------------|-------------------------------------------------------------------------------------------------------------------------------------------------------------------------------------------------------------------------------------------------------------|
| <b>ORGANIZATION OF REHABILITATION SERVICE</b>                                                                                                                                                                                                                                                                                                                                                                                                                             |                         |                                                            |                                                                                                                                                                                                                        |                                                                                                                                                                                                                                                                                                                                                                                                                                                                                        |                                                                                                                                                                                                                                                             |
| Organized community-based and coordinated interprofessional rehabilitation care is recommended in the outpatient or home-based settings.                                                                                                                                                                                                                                                                                                                                  | AHA<br>ESAP<br>Au<br>UK | IC<br>Weak<br>Nil<br><br>LoE: 5<br>QoE: very low<br>SoR: 0 | Rehabilitation personnel e.g., rehabilitation doctor/physician/neurologist; physiotherapist; occupational therapist; speech and language and dysphagia therapist; clinical psychologist; nurse; etc.                   | Inadequate number of rehabilitation personnel.<br>Task-shifting and task-sharing with caregivers                                                                                                                                                                                                                                                                                                                                                                                       | WSO implementation ecosystem on Stroke commissioners to advocate for the training of rehabilitation personnel who can offer domiciliary services                                                                                                            |
| Home-based rehabilitation may be considered as a preferred model for delivering rehabilitation in the community. Where home rehabilitation is unavailable, stroke patients requiring rehabilitation should receive centre-based care.<br>People with stroke living in care homes should be offered assessment and treatment from community stroke rehabilitation services to identify activities and adaptations that might improve quality of life.                      | AHA<br>ESAP             | I A                                                        | Multidisciplinary rehabilitation facilities with rehabilitation doctor/physician/neurologist; physiotherapist; occupational therapist; speech and language and dysphagia therapist; clinical psychologist; nurse; etc. | Major barriers to be surmounted include lack of awareness and low demand, absence of/or inadequate number of rehabilitation professionals (need to establish training institutions/program to produce adequate number of professionals); need to adapt evidence-based practice recommendations to regional capacities (need to establish regional protocols / clinical pathways); need to finance rehabilitation services to make them accessible and available to all stroke patients | WSO implementation ecosystem on Stroke commissioners to develop, implement and monitor strategic action plan with all stakeholders to ensure availability of stroke rehabilitation services to all eligible stroke patients in their countries and regions. |
| All domains, including the body functions and structures (impairment), the activity and participation as well as the environmental factors domain of the ICF, can be used as a common language for professionals when setting goals in a semi-structured, 'guided' manner. Using the main ICF activity and participation domain as broad goal categories will prevent the missing of important goal areas, such as, interactions and relations and social and civil life. | WFNR                    | LoE: 5<br>QoE: very low<br>SoR: 0                          |                                                                                                                                                                                                                        |                                                                                                                                                                                                                                                                                                                                                                                                                                                                                        |                                                                                                                                                                                                                                                             |
| Duration of complex interdisciplinary rehabilitation: It should be continued for a reasonable time to ensure that a potential for gradual recovery has a chance to evolve under specialized treatment and might be repeated at later stages to re-evaluate the potential for recovery.                                                                                                                                                                                    | WFNR                    | LoE: 5<br>QoE: very low<br>[expert opinion]<br>SoR: B+     |                                                                                                                                                                                                                        |                                                                                                                                                                                                                                                                                                                                                                                                                                                                                        |                                                                                                                                                                                                                                                             |

|                                                                                                                                                                                                                                                                                                                                                                                                                                                                                                     |     |                       |                                                                                                                                                                                                                                               |                                                                                                                                                                                                                                                                                                                                               |                                                                                                                                                                                                                                                                                                                                                                                                                                                                                                           |
|-----------------------------------------------------------------------------------------------------------------------------------------------------------------------------------------------------------------------------------------------------------------------------------------------------------------------------------------------------------------------------------------------------------------------------------------------------------------------------------------------------|-----|-----------------------|-----------------------------------------------------------------------------------------------------------------------------------------------------------------------------------------------------------------------------------------------|-----------------------------------------------------------------------------------------------------------------------------------------------------------------------------------------------------------------------------------------------------------------------------------------------------------------------------------------------|-----------------------------------------------------------------------------------------------------------------------------------------------------------------------------------------------------------------------------------------------------------------------------------------------------------------------------------------------------------------------------------------------------------------------------------------------------------------------------------------------------------|
| Comprehensive discharge care plans that address the specific needs of the stroke survivor should be developed in conjunction with the stroke survivor and carer prior to discharge.                                                                                                                                                                                                                                                                                                                 | Au  | Strong recommendation | Adequate number of rehabilitation professionals to establish training institutions/program to produce adequate number of professionals                                                                                                        | Limited number of rehabilitation professionals (need to establish training institutions/program to produce adequate number of professionals)                                                                                                                                                                                                  | Need to finance rehabilitation services to make them accessible and available to all stroke patients                                                                                                                                                                                                                                                                                                                                                                                                      |
| It is recommended that all individuals with stroke discharged to independent community living from post-acute rehabilitation or SNFs receive ADL and IADL assessment directly related to their discharge living setting, patient and family.                                                                                                                                                                                                                                                        | AHA | I B                   | Adequate number of post-acute rehabilitation centres                                                                                                                                                                                          | Limited number of post-acute rehabilitation centres                                                                                                                                                                                                                                                                                           | Need to finance post-acute rehabilitation centres                                                                                                                                                                                                                                                                                                                                                                                                                                                         |
| A functional assessment by a clinician with expertise in rehabilitation is recommended for patients with an acute stroke with residual functional deficits.                                                                                                                                                                                                                                                                                                                                         | AHA | I C                   | Adequate number of rehabilitation professionals to establish training institutions/program to produce adequate number of professionals                                                                                                        | Limited number of rehabilitation professionals (need to establish training institutions/program to produce adequate number of professionals)                                                                                                                                                                                                  | Need to finance rehabilitation services to make them accessible and available to all stroke patients                                                                                                                                                                                                                                                                                                                                                                                                      |
| Determination of post-acute rehabilitation needs should be based on assessments of residual neurological deficits; activity limitations; cognitive, communicative, and psychological status; swallowing ability; determination of previous functional ability and medical comorbidities; level of family/caregiver support; capacity of family/ caregiver to meet the care needs of the stroke survivor; likelihood of returning to community living; and ability to participate in rehabilitation. | AHA | I C                   | Multidisciplinary rehabilitation facilities with rehabilitation doctor/physician/neurologist; physiotherapist; occupational therapist; speech and language and dysphagia therapist; clinical psychologist; occupational therapist nurse; etc. | Major barriers to be surmounted include lack of awareness and low demand, absence of/or inadequate number of rehabilitation professionals (need to establish training institutions/program to produce adequate number of professionals); need to finance rehabilitation services to make them accessible and available to all stroke patients | WSO implementation ecosystem on Stroke commissioners to develop, implement and monitor strategic action plan with all stakeholders to ensure availability of stroke rehabilitation services in a variety of settings to all eligible stroke patients in their countries and regions. Early supported discharge should only be practiced if there is a coordinated community /family-based care and other comorbidities have been controlled such that there is no reason to keep the patient on admission |
| It is reasonable that individuals with stroke discharged from acute and post-acute hospitals/ centers receive formal follow-up on their ADL and IADL status, communication abilities, and functional mobility within 30 days of discharge.                                                                                                                                                                                                                                                          | AHA | Ila B                 | Multidisciplinary rehabilitation facilities with rehabilitation doctor/physician/neurologist; physiotherapist; occupational therapist; speech and language and dysphagia therapist; clinical psychologist; occupational therapist             | Major barriers to be surmounted include lack of awareness and low demand, absence of/or inadequate number of rehabilitation professionals (need to establish training institutions/program to produce adequate number of professionals); need to adapt evidence-based practice recommendations to regional                                    | WSO implementation ecosystem on Stroke commissioners to develop, implement and monitor strategic action plan with all stakeholders to ensure availability of stroke rehabilitation services in a variety of settings to all eligible stroke patients in their countries and regions.                                                                                                                                                                                                                      |

|                                                                                                                                                                                                                                                                                                                                                                                                                                                                                                                                                                                                                                                                                                                                                                                                                                                                                                                                                                                                                                                                                                                                    |                                        |                                                                             |                                                                                                                                                                                                                        |                                                                                                                                                                                                                                                                                                                                                                                                                                                                                        |                                                                                                                                                                                                                                                             |
|------------------------------------------------------------------------------------------------------------------------------------------------------------------------------------------------------------------------------------------------------------------------------------------------------------------------------------------------------------------------------------------------------------------------------------------------------------------------------------------------------------------------------------------------------------------------------------------------------------------------------------------------------------------------------------------------------------------------------------------------------------------------------------------------------------------------------------------------------------------------------------------------------------------------------------------------------------------------------------------------------------------------------------------------------------------------------------------------------------------------------------|----------------------------------------|-----------------------------------------------------------------------------|------------------------------------------------------------------------------------------------------------------------------------------------------------------------------------------------------------------------|----------------------------------------------------------------------------------------------------------------------------------------------------------------------------------------------------------------------------------------------------------------------------------------------------------------------------------------------------------------------------------------------------------------------------------------------------------------------------------------|-------------------------------------------------------------------------------------------------------------------------------------------------------------------------------------------------------------------------------------------------------------|
|                                                                                                                                                                                                                                                                                                                                                                                                                                                                                                                                                                                                                                                                                                                                                                                                                                                                                                                                                                                                                                                                                                                                    |                                        |                                                                             |                                                                                                                                                                                                                        | capacities (need to establish regional protocols / clinical pathways); need to finance rehabilitation services to make them accessible and available to all stroke patients                                                                                                                                                                                                                                                                                                            | Early supported discharge should only be practiced if there is a coordinated community /family-based care and other co-morbidities have been controlled such that there is no reason to keep the patient on admission                                       |
| <p>Early supported discharge in which services are provided at home by a mobile well-resourced coordinated rehabilitation team, should be seen as a part of the stroke treatment pathway for patients with mild or moderate stroke symptoms.</p> <p>Where appropriate stroke services are available, early supported discharge services should be offered to stroke patients with mild to moderate disability.</p> <p>Early supported discharge services are an acceptable form of rehabilitation for a select group of patients when available and provided by a well-resourced, coordinated specialized interprofessional team</p>                                                                                                                                                                                                                                                                                                                                                                                                                                                                                               | AHA (Fearon et al)<br>ESAP<br>Au<br>Ca | I A<br>Strong<br><br>Evidence Level A.                                      | Rehabilitation personnel e.g., rehabilitation doctor/physician/neurologist; physiotherapist; speech and language and dysphagia therapist; clinical psychologist; nurse; etc.                                           | Inadequate number of rehabilitation personnel.<br>Task-shifting and task-sharing with caregivers                                                                                                                                                                                                                                                                                                                                                                                       | WSO implementation ecosystem on Stroke commissioners to advocate for the training of rehabilitation personnel who can offer domiciliary services                                                                                                            |
| <p>It is recommended that stroke survivors receive rehabilitation at an intensity commensurate with anticipated benefit and tolerance.</p> <p>It has been demonstrated that increasing the intensity of therapy (in terms of more hours of exercise) for patients with a stroke, compared to less intensive exercising, results in more rapid recovery of selective movements, comfortable walking speed, maximum walking speed, walking distance, muscle tone, sitting and standing balance, performance of basic activities of daily living, and severity of depression and anxiety.<br/>Studied for early, late and chronic rehabilitation.</p> <p>Patients should receive rehabilitation therapies of appropriate intensity and duration, individually designed to meet their needs for optimal recovery and tolerance levels.</p> <p>People with stroke should accumulate at least 45 minutes of each appropriate therapy every day, at a frequency that enables them to meet their rehabilitation goals, and for as long as they are willing and capable of participating and showing measurable benefit from treatment.</p> | AHA<br>ESAP<br>Ne<br>Ca<br>UK          | I B<br>(Level 1)<br>(Evidence Level A).<br><br>UK evidence level not stated | Multidisciplinary rehabilitation facilities with rehabilitation doctor/physician/neurologist; physiotherapist; occupational therapist; speech and language and dysphagia therapist; clinical psychologist; nurse; etc. | Major barriers to be surmounted include lack of awareness and low demand, absence of/or inadequate number of rehabilitation professionals (need to establish training institutions/program to produce adequate number of professionals); need to adapt evidence-based practice recommendations to regional capacities (need to establish regional protocols / clinical pathways); need to finance rehabilitation services to make them accessible and available to all stroke patients | WSO implementation ecosystem on Stroke commissioners to develop, implement and monitor strategic action plan with all stakeholders to ensure availability of stroke rehabilitation services to all eligible stroke patients in their countries and regions. |
| Communication assessment should consist of interview, conversation, observation, standardized tests, or non-standardized items; assess speech, language, cognitive communication, pragmatics, reading, and writing; identify communicative strengths and weaknesses; and identify helpful compensatory strategies                                                                                                                                                                                                                                                                                                                                                                                                                                                                                                                                                                                                                                                                                                                                                                                                                  | AHA                                    | I B                                                                         | Multidisciplinary approach with clinical neurologist, physiotherapist, occupational therapist, speech and language therapist, clinical psychologist                                                                    | Limited number of rehabilitation professionals (need to establish training institutions/program to produce adequate number of professionals)                                                                                                                                                                                                                                                                                                                                           | Need to finance multidisciplinary rehabilitation services to make them accessible and available to all stroke patients                                                                                                                                      |
| Telerehabilitation is reasonable when face-to-face assessment is impossible or impractical                                                                                                                                                                                                                                                                                                                                                                                                                                                                                                                                                                                                                                                                                                                                                                                                                                                                                                                                                                                                                                         | AHA                                    | Ila A                                                                       | Availability of tele-rehab system with hub and spoke model                                                                                                                                                             | Limited number of organized programs for tele-rehabilitation                                                                                                                                                                                                                                                                                                                                                                                                                           | Sponsoring tele-rehabilitation facilities                                                                                                                                                                                                                   |
| High-dose, very early mobilization within 24 hours of stroke onset can reduce the odds of a favourable outcome at 3 months and is NOT recommended                                                                                                                                                                                                                                                                                                                                                                                                                                                                                                                                                                                                                                                                                                                                                                                                                                                                                                                                                                                  | AHA<br>Au                              | III A<br>Strong                                                             | Appropriate trained rehabilitation staff                                                                                                                                                                               | Same as above                                                                                                                                                                                                                                                                                                                                                                                                                                                                          | Same as above                                                                                                                                                                                                                                               |

|                                                                                                                                                                                                                                                                                                                                                                                                                                                                                                                                                                                                     |      |                                                         |                                                                    |                                                                |                                                             |
|-----------------------------------------------------------------------------------------------------------------------------------------------------------------------------------------------------------------------------------------------------------------------------------------------------------------------------------------------------------------------------------------------------------------------------------------------------------------------------------------------------------------------------------------------------------------------------------------------------|------|---------------------------------------------------------|--------------------------------------------------------------------|----------------------------------------------------------------|-------------------------------------------------------------|
| <p>Patients with difficulty moving early after stroke who are medically stable should be offered frequent, short daily mobilizations (sitting out of bed, standing or walking) by appropriately trained staff with access to appropriate equipment, typically beginning between 24 and 48 hours of stroke onset. Mobilization within 24 hours of onset should only be for patients who require little or no assistance to mobilize</p>                                                                                                                                                              | UK   | Nil                                                     | (physiotherapist) with appropriate equipment                       |                                                                |                                                             |
| <p>Management of secondary complications resulting from primary impairments should commence in the acute phase, as well as being considered during sub-acute and long-term care. This includes prevention, early detection, and reduction strategies</p>                                                                                                                                                                                                                                                                                                                                            | Au   |                                                         | See below                                                          | See below                                                      | See below                                                   |
| <p>Neurological weaning and rehabilitation centres: Prolonged weaning in stroke patients requires a special setting which can best be provided in neurological weaning and rehabilitation centres. Through the integrated possibilities of an adequate weaning process and a neurologically oriented multi-professional rehabilitation both successful weaning and the goal of the best possible interaction may simultaneously be achieved</p>                                                                                                                                                     | WFNR | LoE: 2c<br>QoE: low<br>SoR: B+ [clinical reasoning]     |                                                                    |                                                                |                                                             |
| <p>Weaning strategies: For prolonged weaning of stroke patients, strategies with progressively expanded spontaneous breathing phases can be used, taking into account the underlying pathology and a constant re-evaluation of patient response. In cases of disturbances of neuromuscular transmission, additional pressure support during the spontaneous breathing phases can be useful. Weaning in patients with central respiratory dysregulation disorders should be individualized, taking into account the underlying injury and also regular adjustments according to patient response</p> |      |                                                         |                                                                    |                                                                |                                                             |
| <p>Weaning and rehabilitation: Weaning in stroke patients ought to include (early) rehabilitation of various concomitant aspects of care to achieve best possible patient participation</p>                                                                                                                                                                                                                                                                                                                                                                                                         | WFNR | LoE: 5<br>QoE: very low<br>SoR: A+ [clinical reasoning] |                                                                    |                                                                |                                                             |
| <p>Weaning protocols: Weaning protocols can be used during the weaning process of long-term mechanically ventilated stroke patients</p>                                                                                                                                                                                                                                                                                                                                                                                                                                                             | WFNR | LoE: 5<br>QoE: very low<br>SoR: 0                       |                                                                    |                                                                |                                                             |
| <p>Weaning and success criterion: Patients undergoing early neurological-neurosurgical rehabilitation are considered to have been successfully weaned if they manage at least 48 h without any mechanical ventilation</p>                                                                                                                                                                                                                                                                                                                                                                           | WFNR | LoE: 5<br>QoE: very low<br>SoR: B+ [clinical reasoning] |                                                                    |                                                                |                                                             |
| <b>SKIN</b>                                                                                                                                                                                                                                                                                                                                                                                                                                                                                                                                                                                         |      |                                                         |                                                                    |                                                                |                                                             |
| <p>During hospitalization and inpatient rehabilitation, regular skin assessments are recommended with objective scales of risk such as the Braden scale.</p>                                                                                                                                                                                                                                                                                                                                                                                                                                        | AHA  | I C                                                     | Nurse/ physician/care giver trained to inspect skin                | Training of healthcare providers and caregivers                | Include in routine assessments of stroke patients           |
| <p>It is recommended to minimize or eliminate skin friction, to minimize skin pressure, to provide appropriate support surfaces, to avoid excessive moisture, and to maintain adequate nutrition and</p>                                                                                                                                                                                                                                                                                                                                                                                            | AHA  | I C                                                     | Trained personnel, specialized mattresses (waterbed, air mattress) | Barriers include availability and affordability of specialized | Training of personnel. Provision of specialized mattresses. |



|                                                                                                                                                                                                                                                                                                                                                                                                                                                                                                                                                                                                                                                  |           |            |                                                 |                                                                              |                                                                                                  |
|--------------------------------------------------------------------------------------------------------------------------------------------------------------------------------------------------------------------------------------------------------------------------------------------------------------------------------------------------------------------------------------------------------------------------------------------------------------------------------------------------------------------------------------------------------------------------------------------------------------------------------------------------|-----------|------------|-------------------------------------------------|------------------------------------------------------------------------------|--------------------------------------------------------------------------------------------------|
| hydration to prevent skin breakdown. Regular turning, good skin hygiene, and use of specialized mattresses, wheelchair cushions, and seating are recommended until mobility returns                                                                                                                                                                                                                                                                                                                                                                                                                                                              |           |            |                                                 | mattresses, availability of trained personnel                                |                                                                                                  |
| Patients, staff, and caregivers should be educated about the prevention of skin breakdown                                                                                                                                                                                                                                                                                                                                                                                                                                                                                                                                                        | AHA       | I C        | Trained personnel /training materials           | Trained personnel                                                            | Educate patients, staff and caregivers on the prevention of skin breakdown.                      |
| In ischaemic stroke, prophylactic-dose subcutaneous heparin (UFH or LMWH) should be used for the duration of the acute and rehabilitation hospital stay or until the stroke survivor regains mobility                                                                                                                                                                                                                                                                                                                                                                                                                                            | AHA       | I A        | Subcutaneous heparin                            | Availability of subcutaneous heparin                                         | Provision and administration of sc Heparin for DVT prophylaxis in patients with ischaemic stroke |
| In ICH, it may be reasonable to use intermittent pneumatic compression devices over no prophylaxis                                                                                                                                                                                                                                                                                                                                                                                                                                                                                                                                               | AHA       | IIB C      | intermittent pneumatic compression devices      | Availability and affordability of intermittent pneumatic compression devices | Provision of intermittent pneumatic compression devices for ICH patients                         |
| In ICH, it is not useful to use elastic compression stockings                                                                                                                                                                                                                                                                                                                                                                                                                                                                                                                                                                                    | AHA       | III C      | training                                        | training                                                                     | training                                                                                         |
| In ischaemic stroke, it is not useful to use elastic compression stockings                                                                                                                                                                                                                                                                                                                                                                                                                                                                                                                                                                       | AHA       | III B      | training                                        | training                                                                     | training                                                                                         |
| <b>URINARY TRACT</b>                                                                                                                                                                                                                                                                                                                                                                                                                                                                                                                                                                                                                             |           |            |                                                 |                                                                              |                                                                                                  |
| A history of urological issues before stroke should be obtained                                                                                                                                                                                                                                                                                                                                                                                                                                                                                                                                                                                  | AHA       | I B        | training                                        | training                                                                     | training                                                                                         |
| Assessment of urinary retention through bladder scanning or intermittent catheterizations after voiding while recording volumes is recommended for patients with urinary incontinence or retention                                                                                                                                                                                                                                                                                                                                                                                                                                               | UK<br>AHA | Ila B      |                                                 |                                                                              |                                                                                                  |
| Stroke unit staff should be trained in the use of standardized assessment and management protocols for urinary and faecal incontinence and constipation in people with stroke                                                                                                                                                                                                                                                                                                                                                                                                                                                                    |           |            |                                                 |                                                                              |                                                                                                  |
| Assessment of cognitive awareness of need to void or having voided is reasonable                                                                                                                                                                                                                                                                                                                                                                                                                                                                                                                                                                 |           |            |                                                 |                                                                              |                                                                                                  |
| Removal of the Foley catheter (if any) within 24 hours after admission for acute stroke is recommended                                                                                                                                                                                                                                                                                                                                                                                                                                                                                                                                           | AHA<br>UK | I B<br>Nil | Training, medications, continence aids catheter | Training, availability of affordable continence aids, catheter, medications  | Training of healthcare providers and caregivers, provision of medications and continence aids    |
| People with stroke should NOT have an indwelling (urethral) catheter inserted unless indicated to relieve urinary retention or when fluid balance is critical                                                                                                                                                                                                                                                                                                                                                                                                                                                                                    |           |            |                                                 |                                                                              |                                                                                                  |
| People with stroke who have continued loss of bladder and/or bowel control 2 weeks after onset should be reassessed to identify the cause of incontinence and be involved in deriving a treatment plan (with their family/carers if appropriate). The treatment plan should include:<br>– treatment of any identified cause of incontinence<br>– training for the person with stroke and/or their family/carers in the management of incontinence<br>– referral for specialist treatments and behavioural adaptations if the person is able to participate.<br>– adequate arrangements for the continued supply of continence aids and services. |           |            |                                                 |                                                                              |                                                                                                  |
| People with stroke with continued loss of urinary continence should be offered behavioural interventions and adaptations such as:<br>– timed toileting<br>– prompted voiding                                                                                                                                                                                                                                                                                                                                                                                                                                                                     |           |            |                                                 |                                                                              |                                                                                                  |

|                                                                                                                                                                                                                                                                                                                                                                                                                                                                                                                                                                                                                                                                                                                                 |           |              |                                                                                                     |                                                                                                                                                          |                                                                                                                                                                                                                                                                                                                                                                                                          |
|---------------------------------------------------------------------------------------------------------------------------------------------------------------------------------------------------------------------------------------------------------------------------------------------------------------------------------------------------------------------------------------------------------------------------------------------------------------------------------------------------------------------------------------------------------------------------------------------------------------------------------------------------------------------------------------------------------------------------------|-----------|--------------|-----------------------------------------------------------------------------------------------------|----------------------------------------------------------------------------------------------------------------------------------------------------------|----------------------------------------------------------------------------------------------------------------------------------------------------------------------------------------------------------------------------------------------------------------------------------------------------------------------------------------------------------------------------------------------------------|
| <ul style="list-style-type: none"> <li>– review of caffeine intake</li> <li>– bladder retraining</li> <li>– pelvic floor exercises</li> <li>– external equipment prior to considering pharmaceutical and long-term catheter options</li> </ul>                                                                                                                                                                                                                                                                                                                                                                                                                                                                                  |           |              |                                                                                                     |                                                                                                                                                          |                                                                                                                                                                                                                                                                                                                                                                                                          |
| <p>People with stroke with constipation should be offered:</p> <ul style="list-style-type: none"> <li>– advice on diet, fluid intake and exercise</li> <li>– a regulated routine of toileting</li> <li>– a prescribed drug review to minimize use of constipating drugs</li> <li>– oral laxatives</li> <li>– a structured bowel management program which includes nurse-led bowel care interventions</li> <li>– education and information for the person with stroke and their family/carers</li> <li>– rectal laxatives if severe problems persist</li> </ul> <p>People with continued continence problems on transfer of care from hospital should receive follow-up with specialist continence services in the community</p> | UK        | Nil          | Training, laxatives                                                                                 | Training and availability of laxatives and medications                                                                                                   | Training of healthcare providers and caregivers, provision of medications and continence aids                                                                                                                                                                                                                                                                                                            |
| <b>PAIN</b>                                                                                                                                                                                                                                                                                                                                                                                                                                                                                                                                                                                                                                                                                                                     |           |              |                                                                                                     |                                                                                                                                                          |                                                                                                                                                                                                                                                                                                                                                                                                          |
| Patient and family education (i.e., range of motion, positioning) is recommended for shoulder pain and shoulder care after stroke, particularly before discharge or transitions in care                                                                                                                                                                                                                                                                                                                                                                                                                                                                                                                                         | AHA       | I C          | Education                                                                                           | Education                                                                                                                                                | Training of care providers to educate patients/family members                                                                                                                                                                                                                                                                                                                                            |
| The use of overhead pulley exercises is not recommended                                                                                                                                                                                                                                                                                                                                                                                                                                                                                                                                                                                                                                                                         | AHA       | III C        | Training                                                                                            | Training                                                                                                                                                 | Training                                                                                                                                                                                                                                                                                                                                                                                                 |
| The diagnosis of central poststroke pain should be based on established diagnostic criteria after other causes of pain have been excluded                                                                                                                                                                                                                                                                                                                                                                                                                                                                                                                                                                                       | AHA       | I C          | Training                                                                                            | Training                                                                                                                                                 | Training                                                                                                                                                                                                                                                                                                                                                                                                 |
| The choice of pharmacological agent for the treatment of central poststroke pain should be individualized to the patient's needs and response to therapy and any side effects                                                                                                                                                                                                                                                                                                                                                                                                                                                                                                                                                   | AHA       | I C          | Multidisciplinary approach with clinical neurologist, clinical pharmacist, and pain management team | Major barriers to be surmounted include absence of/or inadequate number of clinical pharmacist and pain management team available to all stroke patients | WSO implementation ecosystem on Stroke commissioners to develop, implement and monitor strategic action plan with all stakeholders to ensure availability of stroke rehabilitation services in a variety of settings to all eligible stroke patients in their countries and regions. In addition to financing co-ordinated programs between Neurologists, clinical pharmacists, and pain management team |
| <p>Amitriptyline and lamotrigine are reasonable first-line pharmacological treatments</p> <p>People with central post-stroke pain should be initially treated with amitriptyline, gabapentin or pregabalin:</p> <ul style="list-style-type: none"> <li>– amitriptyline starting at 10 mg per day, with gradual titration as tolerated, but no higher than 75 mg per day (higher doses could be considered in consultation with a specialist pain service)</li> <li>– gabapentin starting at 300 mg twice daily with titration as tolerated to a maximum of 3.6 g per day</li> </ul>                                                                                                                                             | AHA<br>UK | Ila B<br>Nil | Multidisciplinary approach with clinical neurologist, clinical pharmacist, and pain management team | Major barriers to be surmounted include absence of/or inadequate number of clinical pharmacist and pain management team available to all stroke patients | WSO implementation ecosystem on Stroke commissioners to develop, implement and monitor strategic action plan with all stakeholders to ensure availability of stroke rehabilitation services in a variety                                                                                                                                                                                                 |

|                                                                                                                                                                                                                                                                                                                                                                                                                                                                                                                                                                                                                                                                                                                                                                                                                                                                           |           |            |                                                                                                                      |                                                                                                                                                          |                                                                                                                                                                                                 |
|---------------------------------------------------------------------------------------------------------------------------------------------------------------------------------------------------------------------------------------------------------------------------------------------------------------------------------------------------------------------------------------------------------------------------------------------------------------------------------------------------------------------------------------------------------------------------------------------------------------------------------------------------------------------------------------------------------------------------------------------------------------------------------------------------------------------------------------------------------------------------|-----------|------------|----------------------------------------------------------------------------------------------------------------------|----------------------------------------------------------------------------------------------------------------------------------------------------------|-------------------------------------------------------------------------------------------------------------------------------------------------------------------------------------------------|
| <p>– pregabalin starting at 150 mg per day (in two divided doses; a lower starting dose may be appropriate for some people), with titration as tolerated but no higher than 600 mg per day in two divided doses</p> <p>B People with central post-stroke pain who do not achieve satisfactory pain reduction with initial pharmacological treatment at the maximum tolerated dose should be considered for treatment with another drug or in combination with the original drug:</p> <p>– if initial treatment was with amitriptyline switch to or combine with pregabalin</p> <p>– if initial treatment was with gabapentin switch to pregabalin</p> <p>– if initial treatment was with pregabalin switch to or combine with amitriptyline</p>                                                                                                                           |           |            |                                                                                                                      |                                                                                                                                                          | of settings to all eligible stroke patients in their countries and regions. In addition to financing co-ordinated programs between Neurologists, clinical pharmacists, and pain management team |
| <p>C People with central post-stroke pain should be regularly reviewed including physical and psychological wellbeing, adverse effects, the impact on lifestyle, sleep, activities and participation, and the continued need for pharmacological treatment. If there is sufficient improvement, treatment should be continued and gradual reductions in the dose over time should be considered if improvement is sustained.</p>                                                                                                                                                                                                                                                                                                                                                                                                                                          | UK        | Nil        | Multidisciplinary approach with clinical neurologist, clinical pharmacist, and pain management team                  | Major barriers to be surmounted include absence of/or inadequate number of clinical pharmacist and pain management team available to all stroke patients | Financing co-ordinated programs between neurologists, clinical pharmacists, and pain management team                                                                                            |
| <p>People with musculoskeletal pain after stroke should be assessed to ensure that movement, posture and moving and handling techniques are optimized to reduce pain</p> <p>B People who continue to experience musculoskeletal pain should be offered pharmacological treatment with simple analgesic drugs. Paracetamol, topical non-steroidal anti-inflammatory drugs (NSAIDs) or transcutaneous electrical nerve stimulation (TENS) should be offered before considering the addition of opioid analgesics</p>                                                                                                                                                                                                                                                                                                                                                        | UK        | Nil        | Multidisciplinary approach with physiotherapist, clinical neurologist, clinical pharmacist, and pain management team | Major barriers to be surmounted include inadequate number of rehabilitation professionals, clinical pharmacist and pain management team                  | Financing coordinated programs between neurologists, clinical pharmacists, and pain management team                                                                                             |
| TENS has not been established as an effective treatment                                                                                                                                                                                                                                                                                                                                                                                                                                                                                                                                                                                                                                                                                                                                                                                                                   | AHA       | III B      | Training                                                                                                             | Training                                                                                                                                                 | Training                                                                                                                                                                                        |
| Deep brain stimulation has not been established as an effective treatment                                                                                                                                                                                                                                                                                                                                                                                                                                                                                                                                                                                                                                                                                                                                                                                                 | AHA       | III        | Training                                                                                                             | Training                                                                                                                                                 | Training                                                                                                                                                                                        |
| <b>FALLS</b>                                                                                                                                                                                                                                                                                                                                                                                                                                                                                                                                                                                                                                                                                                                                                                                                                                                              |           |            |                                                                                                                      |                                                                                                                                                          |                                                                                                                                                                                                 |
| It is recommended that individuals with stroke discharged to the community participate in exercise programs with balance training to reduce falls                                                                                                                                                                                                                                                                                                                                                                                                                                                                                                                                                                                                                                                                                                                         | AHA       | I B        | Rehabilitation facilities with trained professionals for balance exercise                                            | Limited number of trained professionals                                                                                                                  | Free online training videos in different languages on goal setting, and caregiver training                                                                                                      |
| It is recommended that individuals with stroke be provided a formal fall prevention program during hospitalization                                                                                                                                                                                                                                                                                                                                                                                                                                                                                                                                                                                                                                                                                                                                                        | AHA<br>UK | I A<br>Nil | In hospital rehabilitation programs with balance and falls risk assessment                                           | Limited number of organized programs with assessment of balance and risk falls                                                                           | Support for workshops, production of free online training materials                                                                                                                             |
| <p>People with stroke should be offered falls risk assessment and management as part of their stroke rehabilitation, including training for them and their family/carers in how to get up after a fall</p> <p>People with stroke should be offered an assessment of fear of falling as part of their falls risk assessment</p> <p>People at high risk of falls after stroke should be offered a standardized assessment of fragility fracture risk as part of their stroke rehabilitation</p> <p>People with stroke with symptoms of vitamin D deficiency, or those who are considered to be at high risk (e.g., housebound) should be offered calcium and vitamin D supplements</p> <p>People at high risk of falls after stroke should be advised to participate in physical activity/exercise which incorporates balance and co-ordination at least twice per week</p> |           |            |                                                                                                                      |                                                                                                                                                          |                                                                                                                                                                                                 |
| Any patient who develops a seizure should be treated with standard management approaches, including a search for reversible causes of seizure in addition to potential use of antiepileptic drugs                                                                                                                                                                                                                                                                                                                                                                                                                                                                                                                                                                                                                                                                         | AHA       | I C        | Availability of well-trained neurologists with experience in epilepsy management                                     | Limited number of trained neurologists                                                                                                                   | WSO implementation ecosystem on Stroke commissioners to develop, implement and monitor                                                                                                          |

|                                                                                                                                                                                                                                                                                                                                                                                                                                                                                                                                                                                                                                                                                                                                                                                                                                                                                     |                 |                                           |                                                                                                           |                                                                                                                                                                                  |                                                                                                                                                                                    |
|-------------------------------------------------------------------------------------------------------------------------------------------------------------------------------------------------------------------------------------------------------------------------------------------------------------------------------------------------------------------------------------------------------------------------------------------------------------------------------------------------------------------------------------------------------------------------------------------------------------------------------------------------------------------------------------------------------------------------------------------------------------------------------------------------------------------------------------------------------------------------------------|-----------------|-------------------------------------------|-----------------------------------------------------------------------------------------------------------|----------------------------------------------------------------------------------------------------------------------------------------------------------------------------------|------------------------------------------------------------------------------------------------------------------------------------------------------------------------------------|
|                                                                                                                                                                                                                                                                                                                                                                                                                                                                                                                                                                                                                                                                                                                                                                                                                                                                                     |                 |                                           |                                                                                                           |                                                                                                                                                                                  | strategic action plan with all stakeholders to ensure availability of trained neurologists                                                                                         |
| <b>DEPRESSION</b>                                                                                                                                                                                                                                                                                                                                                                                                                                                                                                                                                                                                                                                                                                                                                                                                                                                                   |                 |                                           |                                                                                                           |                                                                                                                                                                                  |                                                                                                                                                                                    |
| Administration of a structured depression inventory such as the Patient Health Questionnaire-2 is recommended to routinely screen for poststroke depression                                                                                                                                                                                                                                                                                                                                                                                                                                                                                                                                                                                                                                                                                                                         | AHA             | I B                                       | Availability of well-trained psychiatrists                                                                | Limited number of trained psychiatrists                                                                                                                                          | WSO implementation ecosystem on Stroke commissioners to develop, implement and monitor strategic action plan with all stakeholders to ensure availability of trained psychiatrists |
| Techniques to support people with mild symptoms of depression A range of techniques to support people with mild symptoms of depression can be considered (e.g., behavioral therapy, psychosocial support, and problem-solving)                                                                                                                                                                                                                                                                                                                                                                                                                                                                                                                                                                                                                                                      | WFNR            | LoE: 2a<br>QoE: very low to low<br>SoR: 0 |                                                                                                           |                                                                                                                                                                                  |                                                                                                                                                                                    |
| Patient education about stroke is recommended<br>Patients should be provided with information, advice, and the opportunity to talk about the impact of the illness on their lives<br>All stroke survivors and their families/carers should be offered information tailored to meet their individual needs using relevant language and communication format. Information should be provided at different stages in the recovery process                                                                                                                                                                                                                                                                                                                                                                                                                                              | AHA<br>Au       | I B<br>Strong                             | In-hospital patient education programs, media awareness campaign                                          | Major barriers to be surmounted include lack of awareness and low demand                                                                                                         | Support for awareness campaign, and free online training materials                                                                                                                 |
| Patients diagnosed with poststroke depression should be treated with antidepressants in the absence of contraindications and closely monitored to verify effectiveness<br><br>People with stroke who persistently cry or laugh in unexpected situations or are upset by their fluctuating emotional state should be assessed by a specialist member of the multidisciplinary team trained in the assessment of emotionalism<br>People with severe or persistent emotionalism after stroke should be given antidepressant medication, monitoring effectiveness by the frequency of crying. They should be monitored for adverse effects and treated for at least four months beyond initial recovery. If the person's emotionalism has not improved after 2-4 weeks, medication adherence should be checked before considering a dose increase or a change to another antidepressant | AHA<br>Au<br>UK | I B<br>Strong<br>Nil                      | Multidisciplinary approach with neurologist, clinical psychologist, clinical pharmacist, and psychiatrist | Major barriers to be surmounted include absence of/or inadequate number of neurologists, psychotherapist, clinical pharmacist, and psychiatrist available to all stroke patients | Financing coordinated programs between neurologist, psychotherapist, clinical pharmacist, and psychiatrist management team                                                         |
| No recommendation for the use of any particular class of antidepressants is made. SSRIs are commonly used and generally well tolerated in this patient population                                                                                                                                                                                                                                                                                                                                                                                                                                                                                                                                                                                                                                                                                                                   | AHA<br>Au       | III A<br>Strong                           | Training                                                                                                  | Training                                                                                                                                                                         | Training                                                                                                                                                                           |
| In the first months, post-stroke antidepressant pharmacotherapy is only recommended if the process of rehabilitation is hindered by emotional problems. Increasing motivation for and participation in rehabilitation is the target for treatment. Selective serotonin reuptake inhibitors, SSRIs should be considered when depressive complaints or emotionalism are long lasting and become chronic while adverse effects should be monitored continuously                                                                                                                                                                                                                                                                                                                                                                                                                        | WFNR            | LoE: 1a<br>QoE: moderate<br>SoR: B+       |                                                                                                           |                                                                                                                                                                                  |                                                                                                                                                                                    |
| People with stroke with one mood disorder (e.g., depression) should be assessed for others (e.g., anxiety)<br>B People with or at risk of depression or anxiety after stroke should be offered brief psychological interventions such as motivational interviewing or problem-solving therapy (adapted, if necessary,                                                                                                                                                                                                                                                                                                                                                                                                                                                                                                                                                               | UK              | Nil                                       | Multidisciplinary approach with neurologist, clinical psychologist, and psychiatrist team                 | Major barriers to be surmounted include absence of/or inadequate number of neurologists, clinical                                                                                | Financing coordinated programs between stroke physician / neurologist, clinical psychologist,                                                                                      |

|                                                                                                                                                                                                                                                                                                                                                                                                                                                                                                                                                                                                                                                                                                                                                                                                                                                                                                                                                                                                                                                                                                                                                                                                                                                                                                                                                                                                                                                                                                                                                                                                                                                                                                                                                                                                                                                                                                                         |                   |                                                                        |                                                                                                                                                                                                                     |                                                                                                                                                                                                                                                                                                                                                                                                                                                                                                                                                                                                                                                                                                                                                                                                                                                                                                                   |
|-------------------------------------------------------------------------------------------------------------------------------------------------------------------------------------------------------------------------------------------------------------------------------------------------------------------------------------------------------------------------------------------------------------------------------------------------------------------------------------------------------------------------------------------------------------------------------------------------------------------------------------------------------------------------------------------------------------------------------------------------------------------------------------------------------------------------------------------------------------------------------------------------------------------------------------------------------------------------------------------------------------------------------------------------------------------------------------------------------------------------------------------------------------------------------------------------------------------------------------------------------------------------------------------------------------------------------------------------------------------------------------------------------------------------------------------------------------------------------------------------------------------------------------------------------------------------------------------------------------------------------------------------------------------------------------------------------------------------------------------------------------------------------------------------------------------------------------------------------------------------------------------------------------------------|-------------------|------------------------------------------------------------------------|---------------------------------------------------------------------------------------------------------------------------------------------------------------------------------------------------------------------|-------------------------------------------------------------------------------------------------------------------------------------------------------------------------------------------------------------------------------------------------------------------------------------------------------------------------------------------------------------------------------------------------------------------------------------------------------------------------------------------------------------------------------------------------------------------------------------------------------------------------------------------------------------------------------------------------------------------------------------------------------------------------------------------------------------------------------------------------------------------------------------------------------------------|
| <p>for use with people with aphasia or cognitive problems) before considering antidepressant medication</p> <p>C People with mild or moderate symptoms of psychological distress, depression or anxiety after stroke should be given information, support and advice and considered for one or more of the following interventions:</p> <ul style="list-style-type: none"> <li>– increased social interaction</li> <li>– increased exercise</li> <li>– other psychosocial interventions such as psychosocial education groups</li> </ul> <p>D People with aphasia and low mood after stroke should be considered for individual behavioural therapy e.g., from an assistant psychologist</p> <p>E People with depression or anxiety after stroke who are treated with antidepressant medication should be monitored for adverse effects and treated for at least four months beyond initial recovery. If the person’s mood has not improved after 2-4 weeks, medication adherence should be checked before considering a dose increase or a change to another antidepressant</p> <p>F People with severe or persistent symptoms of emotional disturbance after stroke should receive specialist assessment and treatment from a clinical neuropsychologist/clinical psychologist</p> <p>G People with persistent moderate to severe emotional disturbance after stroke who have not responded to high intensity psychological intervention or pharmacological treatment should be considered for collaborative care. Their care should involve collaboration between the GP, primary and secondary physical health services and case management, with supervision from a senior mental health professional and should include long term follow-up</p> <p>People diagnosed with emotionalism after stroke should be appropriately distracted from the provoking stimulus when they show increased emotional behavior</p> |                   | <p>psychologist, and psychiatrist available to all stroke patients</p> | <p>and psychiatrist management team</p>                                                                                                                                                                             |                                                                                                                                                                                                                                                                                                                                                                                                                                                                                                                                                                                                                                                                                                                                                                                                                                                                                                                   |
| <p>Problem-solving therapy and motivational interviewing can be considered to prevent depressive symptoms post-stroke</p>                                                                                                                                                                                                                                                                                                                                                                                                                                                                                                                                                                                                                                                                                                                                                                                                                                                                                                                                                                                                                                                                                                                                                                                                                                                                                                                                                                                                                                                                                                                                                                                                                                                                                                                                                                                               | <p>WFNR</p>       | <p>LoE: 2b<br/>QoE: low<br/>SoR: 0</p>                                 |                                                                                                                                                                                                                     |                                                                                                                                                                                                                                                                                                                                                                                                                                                                                                                                                                                                                                                                                                                                                                                                                                                                                                                   |
| <p><b>MISCELLANEOUS</b></p>                                                                                                                                                                                                                                                                                                                                                                                                                                                                                                                                                                                                                                                                                                                                                                                                                                                                                                                                                                                                                                                                                                                                                                                                                                                                                                                                                                                                                                                                                                                                                                                                                                                                                                                                                                                                                                                                                             |                   |                                                                        |                                                                                                                                                                                                                     |                                                                                                                                                                                                                                                                                                                                                                                                                                                                                                                                                                                                                                                                                                                                                                                                                                                                                                                   |
| <p>It is recommended that all individuals with stroke be provided a formal assessment of their ADLs and IADLs, communication abilities, and functional mobility before discharge from acute care hospitalization and the findings be incorporated into the care transition and the discharge planning process</p> <p>People with stroke should be formally assessed for their safety and independence in all relevant personal activities of daily living by a clinician with the appropriate expertise, and the findings should be recorded using a standardized assessment tool</p> <p>People with limitations of personal activities of daily living after stroke should be referred to an occupational therapist with experience in neurological disability, be assessed within 72 hours of referral, and be offered treatment for identified problems (e.g., feeding, toileting) by the occupational therapist, who should also involve other members of the specialist multidisciplinary team</p> <p>People with stroke should be offered, as needed, specific treatments that include:</p> <ul style="list-style-type: none"> <li>– dressing practice for people with residual problems with dressing– as many opportunities as appropriate to practice self-care</li> </ul>                                                                                                                                                                                                                                                                                                                                                                                                                                                                                                                                                                                                                                     | <p>AHA<br/>UK</p> | <p>I B<br/>Nil</p>                                                     | <p>Multidisciplinary rehabilitation facilities with rehab doctor/physician/neurologist; physiotherapist; speech and language and dysphagia therapist; clinical psychologist; occupational therapist nurse; etc.</p> | <p>Major barriers to be surmounted include lack of awareness and low demand, absence of/or inadequate number of rehabilitation professionals (need to establish training institutions/program to produce adequate number of professionals); need to adapt evidence-based practice recommendations to regional capacities (need to establish regional protocols / clinical pathways); need to finance rehabilitation services to make</p> <p>WSO implementation ecosystem on Stroke commissioners to develop, implement and monitor strategic action plan with all stakeholders to ensure availability of stroke rehabilitation services in a variety of settings to all eligible stroke patients in their countries and regions. Early supported discharge should only be practiced if there is a coordinated community/family-based care; and other comorbidities have been controlled such that there is no</p> |

|                                                                                                                                                                                                                                                                                                                                                                                                                                                                                                                                                                                                                                                                                                                                                                                                                                                                                                                                                                                                                                                                                                                                                                                                                                                                                                                                                                                                                                                                                                                                                                                                                 |      |                                                                  |                                                                                                                                        |                                                                                                                                              |                                                                                                      |
|-----------------------------------------------------------------------------------------------------------------------------------------------------------------------------------------------------------------------------------------------------------------------------------------------------------------------------------------------------------------------------------------------------------------------------------------------------------------------------------------------------------------------------------------------------------------------------------------------------------------------------------------------------------------------------------------------------------------------------------------------------------------------------------------------------------------------------------------------------------------------------------------------------------------------------------------------------------------------------------------------------------------------------------------------------------------------------------------------------------------------------------------------------------------------------------------------------------------------------------------------------------------------------------------------------------------------------------------------------------------------------------------------------------------------------------------------------------------------------------------------------------------------------------------------------------------------------------------------------------------|------|------------------------------------------------------------------|----------------------------------------------------------------------------------------------------------------------------------------|----------------------------------------------------------------------------------------------------------------------------------------------|------------------------------------------------------------------------------------------------------|
| <ul style="list-style-type: none"> <li>– assessment, provision and training in the use of equipment and adaptations that increase safe independence</li> <li>– training of family/carers in how to help the person with stroke</li> </ul> <p>People whose activities have been limited by stroke should be:</p> <ul style="list-style-type: none"> <li>– assessed by an occupational therapist with expertise in neurological disability</li> <li>– trained in how to achieve activities safely and be given as many opportunities to practise as reasonable under supervision, provided that the activities are potentially achievable</li> <li>– provided with and trained in how to use any adaptations or equipment needed to perform activities safely</li> </ul> <p>People with stroke who cannot undertake a necessary activity safely should be offered alternative means of achieving the goal to ensure safety and well-being</p> <p>People with difficulty executing tasks after stroke despite adequate limb movement should be assessed for the presence of apraxia using standardized measures</p> <p>B People with apraxia after stroke should:</p> <ul style="list-style-type: none"> <li>– have their profile of impaired and preserved abilities determined using a standardized approach</li> <li>– have the impairment and the impact on function explained to them, their family/carers, and the multidisciplinary team</li> <li>– be offered therapy and/or trained in compensatory techniques specific to the deficits identified, ideally in the context of a clinical trial</li> </ul> |      |                                                                  |                                                                                                                                        | them accessible and available to all stroke patients                                                                                         | reason to keep the patient on admission                                                              |
| For stroke survivors in the acute, sub-acute or chronic phase post-stroke, acupuncture should NOT be used to improve AD                                                                                                                                                                                                                                                                                                                                                                                                                                                                                                                                                                                                                                                                                                                                                                                                                                                                                                                                                                                                                                                                                                                                                                                                                                                                                                                                                                                                                                                                                         | Au   | Strong recommendation AGAINST                                    | Training                                                                                                                               | Training                                                                                                                                     | Training                                                                                             |
| Administration of amphetamines to improve ADL is NOT recommended                                                                                                                                                                                                                                                                                                                                                                                                                                                                                                                                                                                                                                                                                                                                                                                                                                                                                                                                                                                                                                                                                                                                                                                                                                                                                                                                                                                                                                                                                                                                                | Au   | Strong recommendation AGAINST                                    | Training                                                                                                                               | Training                                                                                                                                     | Training                                                                                             |
| <b>CONSCIOUSNESS</b>                                                                                                                                                                                                                                                                                                                                                                                                                                                                                                                                                                                                                                                                                                                                                                                                                                                                                                                                                                                                                                                                                                                                                                                                                                                                                                                                                                                                                                                                                                                                                                                            |      |                                                                  |                                                                                                                                        |                                                                                                                                              |                                                                                                      |
| Amantadine for a course of amantadine treatment over a couple of weeks can be used in the beginning of the rehabilitation treatment of stroke survivors with DoC (VS-MCS) to promote recovery in the disability domain<br>The evidence is too limited to guide clinical decision-making with respect to long-term use and discontinuation of amantadine, or the prescription of other drugs to treat DoC in stroke survivors                                                                                                                                                                                                                                                                                                                                                                                                                                                                                                                                                                                                                                                                                                                                                                                                                                                                                                                                                                                                                                                                                                                                                                                    | WFNR | LoE: 1b<br>QoE: moderate<br>SoR: 0<br>[indirectness of evidence] |                                                                                                                                        |                                                                                                                                              |                                                                                                      |
| The evidence is too limited to guide clinical decision-making for therapies such as tilt therapy with integrated stepping device, repetitive transcranial magnetic stimulation, rTMS, or transcranial direct current stimulation, tDCS when used with the intention to treat DoC in stroke survivors. Their use is discouraged for routine clinical practice with the therapeutic goal to improve DoC in stroke survivors                                                                                                                                                                                                                                                                                                                                                                                                                                                                                                                                                                                                                                                                                                                                                                                                                                                                                                                                                                                                                                                                                                                                                                                       | WFNR | LoE: 4 to 1b<br>QoE: very low to moderate<br>SoR: B-             |                                                                                                                                        |                                                                                                                                              |                                                                                                      |
| The routine administration of standardized measures can be useful to document the severity of stroke and resulting disability, starting in the acute phase, and progressing over the course of recovery and rehabilitation.                                                                                                                                                                                                                                                                                                                                                                                                                                                                                                                                                                                                                                                                                                                                                                                                                                                                                                                                                                                                                                                                                                                                                                                                                                                                                                                                                                                     | AHA  | Ila C                                                            | Adequate number of rehabilitation professionals to establish training institutions/program to produce adequate number of professionals | Limited number of rehabilitation professionals (need to establish training institutions/program to produce adequate number of professionals) | Need to finance rehabilitation services to make them accessible and available to all stroke patients |

## COGNITION

|                                                                                                                                                                                                                                                                                                                                   |                  |                         |                                                                                                                                 |                                              |                                                                               |
|-----------------------------------------------------------------------------------------------------------------------------------------------------------------------------------------------------------------------------------------------------------------------------------------------------------------------------------|------------------|-------------------------|---------------------------------------------------------------------------------------------------------------------------------|----------------------------------------------|-------------------------------------------------------------------------------|
| Screening for cognitive deficits is recommended for all stroke patients before discharge home                                                                                                                                                                                                                                     | AHA<br>AHA<br>UK | I B<br>IIa C<br><br>Nil | Multidisciplinary approach should include trained clinical psychologist experienced in cognitive assessment (neuropsychologist) | Limited number of trained neuropsychologists | Need to finance multidisciplinary rehabilitation including neuropsychologists |
| When screening reveals cognitive deficits, a more detailed neuropsychological evaluation to identify areas of cognitive strength and weakness may be beneficial                                                                                                                                                                   |                  |                         |                                                                                                                                 |                                              |                                                                               |
| Services for people with stroke should have a comprehensive approach to delivering psychological care that includes specialist clinical neuropsychology/clinical psychology input within the multidisciplinary team                                                                                                               |                  |                         |                                                                                                                                 |                                              |                                                                               |
| People with stroke should be considered to have at least some cognitive impairment in the early phase. Routine screening should be undertaken to identify the person's level of functioning, using standardized measures                                                                                                          |                  |                         |                                                                                                                                 |                                              |                                                                               |
| People with communication impairment after stroke should receive a cognitive assessment using valid assessments in conjunction with a speech and language therapist. Specialist advice should be sought if there is uncertainty about the interpretation of cognitive test results                                                |                  |                         |                                                                                                                                 |                                              |                                                                               |
| Any person with stroke who is not progressing as expected in rehabilitation should receive a detailed assessment to determine whether cognitive impairments are responsible, with the results explained to the person, their family, and the multidisciplinary team                                                               |                  |                         |                                                                                                                                 |                                              |                                                                               |
| People with acute cognitive problems after stroke whose care is being transferred from hospital should receive an assessment for any safety risks from persisting cognitive impairments. Risks should be communicated to their primary care team together with any mental capacity issues that might affect their decision-making |                  |                         |                                                                                                                                 |                                              |                                                                               |
| People with stroke returning to cognitively demanding activities such as driving, or work should have their cognition fully assessed                                                                                                                                                                                              |                  |                         |                                                                                                                                 |                                              |                                                                               |
| People with continuing cognitive difficulties after stroke should be considered for comprehensive interventions aimed at developing compensatory behaviours and learning adaptive skills                                                                                                                                          | UK               | Nil                     | Multidisciplinary approach should include trained neuropsychologist experienced in cognitive assessment                         | Limited number of trained neuropsychologists | Need to finance multidisciplinary rehabilitation including neuropsychologists |
| People with severe or persistent cognitive problems after stroke should receive specialist assessment and treatment from a clinical neuropsychologist/clinical psychologist                                                                                                                                                       |                  |                         | Multidisciplinary approach should include trained clinical psychologist experienced in cognitive assessment (neuropsychologist) |                                              |                                                                               |
| People with cognitive problems after stroke should receive appropriate adjustments to their multidisciplinary treatments to enable them to participate, and this should be regularly reviewed                                                                                                                                     |                  |                         |                                                                                                                                 |                                              |                                                                               |
| The specialist multidisciplinary team should be involved in making decisions about mental capacity, and should provide information and advice to the person with stroke (when appropriate) and their family/carers                                                                                                                | UK               | Nil                     | Multidisciplinary approach should include trained clinical psychologist experienced in                                          | Limited number of trained neuropsychologists | Need to finance multidisciplinary rehabilitation including neuropsychologists |

|                                                                                                                                                                                                                                                                                                                                                                                                                                                                                                                                                                                                                                                                                                             |           |                                               |                                                                                                                                                                              |                                                                                                                |                                                                                                                                              |
|-------------------------------------------------------------------------------------------------------------------------------------------------------------------------------------------------------------------------------------------------------------------------------------------------------------------------------------------------------------------------------------------------------------------------------------------------------------------------------------------------------------------------------------------------------------------------------------------------------------------------------------------------------------------------------------------------------------|-----------|-----------------------------------------------|------------------------------------------------------------------------------------------------------------------------------------------------------------------------------|----------------------------------------------------------------------------------------------------------------|----------------------------------------------------------------------------------------------------------------------------------------------|
|                                                                                                                                                                                                                                                                                                                                                                                                                                                                                                                                                                                                                                                                                                             |           |                                               | cognitive assessment<br>(neuropsychologist)                                                                                                                                  |                                                                                                                |                                                                                                                                              |
| Evaluation of stroke patients for sensory impairments, including touch, vision, and hearing, is probably indicated                                                                                                                                                                                                                                                                                                                                                                                                                                                                                                                                                                                          | AHA       | Ila B                                         | Availability of clinical neurologist and physiotherapist                                                                                                                     | Limited number clinical neurologist and physiotherapist                                                        | Need to finance multidisciplinary rehabilitation stroke program                                                                              |
| People with stroke should be:<br>– assessed for visual acuity whilst wearing the appropriate glasses to check their ability to read newspaper text and see distant objects clearly<br>– examined for the presence of visual field deficit (e.g., hemianopia) and eye movement disorders (e.g., strabismus and motility deficit)                                                                                                                                                                                                                                                                                                                                                                             | UK        | Nil                                           | Availability of clinical ophthalmologist for stroke patient                                                                                                                  | Limited number of clinical ophthalmologists                                                                    | Need to finance coordinated program between neurologists and clinical ophthalmologists for stroke cases presenting with visual symptoms      |
| People with altered vision, visual field defects or eye movement disorders after stroke should receive information, support, and advice from an orthoptist and/or an ophthalmologist                                                                                                                                                                                                                                                                                                                                                                                                                                                                                                                        |           |                                               |                                                                                                                                                                              |                                                                                                                |                                                                                                                                              |
| People with visual loss due to retinal artery occlusion should be jointly managed by an ophthalmologist and a stroke physician                                                                                                                                                                                                                                                                                                                                                                                                                                                                                                                                                                              |           |                                               |                                                                                                                                                                              |                                                                                                                |                                                                                                                                              |
| It has been shown that visual search training was more effective than prism glasses and standard care (no training) in improving vision-related quality of life in patients with visual field deficits, VFDs. As a consequence, they should be used for treatment of VFD patients                                                                                                                                                                                                                                                                                                                                                                                                                           |           | LoE: 2a-1a<br>QoE: low to moderate<br>SoR: B+ |                                                                                                                                                                              |                                                                                                                |                                                                                                                                              |
| With an acquired deficit of light and/or dark adaptation of the visual system (not the eye!) tinted glasses may reduce the feelings of blinding, while additional light sources and the use of light dimmers are helpful to cope with dark vision. These treatments do not “heal” the original underlying disorder or light–dark adaptation, but they alleviate the behavioral consequences for the patients and can be used                                                                                                                                                                                                                                                                                | WFNR      | LoE: 4<br>QoE: very low<br>SoR: 0             |                                                                                                                                                                              |                                                                                                                |                                                                                                                                              |
| Systematization of visual search strategies by cognitive instructions reduces omissions                                                                                                                                                                                                                                                                                                                                                                                                                                                                                                                                                                                                                     | WFNR      | LoE: 4 - 2b<br>QoE: low<br>SoR: 0             |                                                                                                                                                                              |                                                                                                                |                                                                                                                                              |
| People with stroke should be screened for altered sensation and if present, assessed for sensory impairments using standardized measures                                                                                                                                                                                                                                                                                                                                                                                                                                                                                                                                                                    | UK        | Nil                                           | Availability of clinical neurologist and physiotherapist                                                                                                                     | Limited number clinical neurologist and physiotherapist                                                        | Need to finance multidisciplinary rehabilitation stroke program                                                                              |
| People with sensory loss after stroke should be trained in how to avoid injury to the affected body parts                                                                                                                                                                                                                                                                                                                                                                                                                                                                                                                                                                                                   |           |                                               |                                                                                                                                                                              |                                                                                                                |                                                                                                                                              |
| Recommendations: Nondrug therapies for cognitive impairment, including memory class level of evidence, enriched environments to increase engagement with cognitive activities are recommended                                                                                                                                                                                                                                                                                                                                                                                                                                                                                                               | AHA<br>UK | I A<br>Nil                                    | Multidisciplinary approach should include trained clinical psychologist, neuropsychiatrist for assessment, advice, and monitoring for stroke cases with cognitive impairment | Limited number of trained clinical psychologist, neuropsychiatrist in cognitive and neurobehavioral assessment | Financing coordinated programs between neurologists, clinical psychologist, and neuropsychiatrist for stroke cases with cognitive impairment |
| People with stroke who report memory problems and those considered to have problems with learning and remembering should have their memory assessed using standardized measures<br>B People with memory impairment after stroke causing difficulties with rehabilitation should:<br>– have the impairment explained to them, their family/carers and the multidisciplinary team<br>– be assessed for treatable or contributing factors (e.g., delirium, hypothyroidism)<br>– have their profile of impaired and preserved memory abilities determined, including the impact of other cognitive deficits e.g., attention<br>– have nursing and therapy sessions altered to capitalize on preserved abilities |           |                                               |                                                                                                                                                                              |                                                                                                                |                                                                                                                                              |



|                                                                                                                                                                                                                                                                                                                                                                                                                                                                                                                                                                                                                                                                                                                                                                                                                                                                                                                                                                                                                                                                                                                                                                                                                                                                                                                                                                                                                                                                                                                                                                       |                 |                         |                                                                                                                                                                                                         |                                                                                                                                            |                                                                                                                               |
|-----------------------------------------------------------------------------------------------------------------------------------------------------------------------------------------------------------------------------------------------------------------------------------------------------------------------------------------------------------------------------------------------------------------------------------------------------------------------------------------------------------------------------------------------------------------------------------------------------------------------------------------------------------------------------------------------------------------------------------------------------------------------------------------------------------------------------------------------------------------------------------------------------------------------------------------------------------------------------------------------------------------------------------------------------------------------------------------------------------------------------------------------------------------------------------------------------------------------------------------------------------------------------------------------------------------------------------------------------------------------------------------------------------------------------------------------------------------------------------------------------------------------------------------------------------------------|-----------------|-------------------------|---------------------------------------------------------------------------------------------------------------------------------------------------------------------------------------------------------|--------------------------------------------------------------------------------------------------------------------------------------------|-------------------------------------------------------------------------------------------------------------------------------|
| <ul style="list-style-type: none"> <li>– be trained in approaches that help them to encode, store and retrieve new information e.g., spaced retrieval (increasing time intervals between review of information) or deep encoding of material (emphasizing semantic features)</li> <li>– be trained in compensatory techniques to reduce their prospective memory problems (e.g., use of electronic reminders or written checklists)</li> <li>– receive therapy in an environment as similar as possible to their usual environment</li> </ul>                                                                                                                                                                                                                                                                                                                                                                                                                                                                                                                                                                                                                                                                                                                                                                                                                                                                                                                                                                                                                         |                 |                         |                                                                                                                                                                                                         |                                                                                                                                            |                                                                                                                               |
| <p>Use of cognitive rehabilitation to improve attention, memory, visual neglect, and executive functioning is reasonable. It has been demonstrated that attention training using compensation strategies has a favorable effect on the attention span of patients whose stroke occurred 6 weeks ago</p> <p>Cognitive rehabilitation aimed at memory deficits</p> <p>It has been demonstrated that memory strategies using internal and external strategies have a favorable effect on patients with a stroke in terms of learning to compensate for mild memory deficits (Level 1).</p> <p>People who appear easily distracted or unable to concentrate after stroke should have their attentional abilities assessed using standardized measures</p> <p>People with impaired attention after stroke should have cognitive demands reduced by:</p> <ul style="list-style-type: none"> <li>– having shorter treatment sessions</li> <li>– taking planned rests</li> <li>– reducing background distractions</li> <li>– avoiding activities when tired</li> </ul> <p>People with impaired attention after stroke should:</p> <ul style="list-style-type: none"> <li>– have the impairment explained to them, their family/carers and the multidisciplinary team</li> <li>– be offered an attentional intervention (e.g., time pressure management, attention process training, environmental manipulation), ideally in the context of a clinical trial</li> <li>– be given as many opportunities to practice their activities as reasonable under supervision</li> </ul> | AHA<br>Ne<br>UK | Ila B<br>Level 1<br>Nil | Multidisciplinary approach should include trained neuropsychologist or physician with training in cognitive neurology for assessment, advice, and monitoring for stroke cases with cognitive impairment | Limited number of trained neuropsychologist or physician with training in cognitive neurology for cognitive and neurobehavioral assessment | Financing coordinated programs between clinical neurologists and neuropsychologist for stroke cases with cognitive impairment |
| <p>People who appear to have perceptual difficulties after stroke should have a perceptual assessment using standardized measures</p> <p>People with agnosia after stroke should:</p> <ul style="list-style-type: none"> <li>– have the impairment explained to them, their family/carers and the multidisciplinary team</li> <li>– have their environment assessed and adapted to reduce potential risks and promote independence</li> <li>– be offered a perceptual intervention, such as functional training, sensory stimulation, strategy training and/or task repetition, ideally in the context of a clinical trial.</li> </ul>                                                                                                                                                                                                                                                                                                                                                                                                                                                                                                                                                                                                                                                                                                                                                                                                                                                                                                                                | UK              | Nil                     | Multidisciplinary approach should include trained neuropsychologist or physician with training in cognitive neurology for assessment, advice and monitoring for stroke cases with cognitive impairment  | Limited number of trained neuropsychologist or physician with training in cognitive neurology for cognitive and neurobehavioral assessment | Financing coordinated programs between clinical neurologists and neuropsychologist for stroke cases with cognitive impairment |
| <p>Use of cognitive training strategies that consider practice, compensation, and adaptive techniques for increasing independence is reasonable</p>                                                                                                                                                                                                                                                                                                                                                                                                                                                                                                                                                                                                                                                                                                                                                                                                                                                                                                                                                                                                                                                                                                                                                                                                                                                                                                                                                                                                                   | AHA             | Ila B                   | Multidisciplinary approach should include trained neuropsychologist or physician with training in cognitive neurology for assessment, advice and monitoring for stroke cases with cognitive impairment  | Limited number of trained neuropsychologist or physician with training in cognitive neurology for cognitive and neurobehavioral assessment | Financing coordinated programs between clinical neurologists and neuropsychologist for stroke cases with cognitive impairment |

|                                                                                                                                                                                                                                                                                                                                                                                                                                                                                                                                                                                                                                                                                                                                                                                                                                                                                                                                                                                                                                                                                                                                                                                                                                                                                                                                                                                                                                                                                                                   |           |                                                            |                                                                                                                                                                                                        |                                                                                                                                            |                                                                                                                               |
|-------------------------------------------------------------------------------------------------------------------------------------------------------------------------------------------------------------------------------------------------------------------------------------------------------------------------------------------------------------------------------------------------------------------------------------------------------------------------------------------------------------------------------------------------------------------------------------------------------------------------------------------------------------------------------------------------------------------------------------------------------------------------------------------------------------------------------------------------------------------------------------------------------------------------------------------------------------------------------------------------------------------------------------------------------------------------------------------------------------------------------------------------------------------------------------------------------------------------------------------------------------------------------------------------------------------------------------------------------------------------------------------------------------------------------------------------------------------------------------------------------------------|-----------|------------------------------------------------------------|--------------------------------------------------------------------------------------------------------------------------------------------------------------------------------------------------------|--------------------------------------------------------------------------------------------------------------------------------------------|-------------------------------------------------------------------------------------------------------------------------------|
| Compensatory strategies may be considered to improve memory functions, including the use of internalized strategies (e.g., visual imagery, semantic organization, spaced practice) and external memory assistive technology (e.g., notebooks, paging systems, computers, other prompting devices)                                                                                                                                                                                                                                                                                                                                                                                                                                                                                                                                                                                                                                                                                                                                                                                                                                                                                                                                                                                                                                                                                                                                                                                                                 | AHA       | IIB A                                                      | Multidisciplinary approach should include trained neuropsychologist or physician with training in cognitive neurology for assessment, advice and monitoring for stroke cases with cognitive impairment | Limited number of trained neuropsychologist or physician with training in cognitive neurology for cognitive and neurobehavioral assessment | Financing coordinated programs between clinical neurologists and neuropsychologist for stroke cases with cognitive impairment |
| Interventions for cognitive-communication disorders are reasonable to consider if they are individually tailored and target:<br>The overt communication deficit affecting prosody, comprehension, expression of discourse, and pragmatics. The cognitive deficits that accompany or underlie the communication deficit, including attention, memory, and executive                                                                                                                                                                                                                                                                                                                                                                                                                                                                                                                                                                                                                                                                                                                                                                                                                                                                                                                                                                                                                                                                                                                                                | AHA       | Ila B                                                      | Multidisciplinary approach should include trained neuropsychologist or physician with training in cognitive neurology for assessment, advice and monitoring for stroke cases with cognitive impairment | Limited number of trained neuropsychologist or physician with training in cognitive neurology for cognitive and neurobehavioral assessment | Financing coordinated programs between clinical neurologists and neuropsychologist for stroke cases with cognitive impairment |
| It has been demonstrated that visual scanning training has a favorable effect on the attention for the neglected side of patients with a stroke in the right hemisphere. Studied for ER (B), LR (B) and RC<br><br>People with stroke affecting the non-dominant cerebral hemisphere should be considered at risk of impaired awareness on the contralateral side and should be assessed for this using standardized measures<br>When assessing problems with spatial awareness in people with stroke, clinicians should use a standardized test battery in preference to a single subtest, and the effect on functional tasks such as dressing, and mobility should be included<br><br>People with impaired awareness to one side after stroke should:<br>– have the impairment explained to them, their family/carers and the multidisciplinary team<br>– be trained in compensatory strategies to reduce the impact on their activities<br>– be given cues to draw attention to the affected side during therapy and nursing activities<br>– be monitored to ensure that they do not eat too little through missing food on one side of the plate<br>– be offered interventions aimed at reducing the functional impact of the reduced awareness (e.g., visual scanning training, limb activation, sensory stimulation, eye patching, prism wearing, prism adaptation training, mirror therapy, galvanic vestibular stimulation, transcranial magnetic stimulation), ideally in the context of a clinical trial | Ne<br>UK  | Level 1<br>Nil                                             | Multidisciplinary approach should include trained neuropsychiatrist for assessment, advice and monitoring for stroke cases with cognitive impairment                                                   | Major barriers to be surmounted include lack of awareness and low demand, absence of/or inadequate number of professionals                 | Financing training program, workshops and online materials for healthcare provider                                            |
| <b>DYSPHASIA SCREENING, MANAGEMENT, AND NUTRITIONAL SUPPORT</b>                                                                                                                                                                                                                                                                                                                                                                                                                                                                                                                                                                                                                                                                                                                                                                                                                                                                                                                                                                                                                                                                                                                                                                                                                                                                                                                                                                                                                                                   |           |                                                            |                                                                                                                                                                                                        |                                                                                                                                            |                                                                                                                               |
| Early dysphagia screening is recommended for acute stroke patients to identify dysphagia or aspiration, which can lead to pneumonia, malnutrition, dehydration, and other complications                                                                                                                                                                                                                                                                                                                                                                                                                                                                                                                                                                                                                                                                                                                                                                                                                                                                                                                                                                                                                                                                                                                                                                                                                                                                                                                           | AHA<br>Au | I B<br>Strong                                              | Multidisciplinary approach should include trained speech and swallowing therapist                                                                                                                      | Limited number of trained speech and swallowing therapist                                                                                  | Financing training program, workshops and online materials for healthcare provider                                            |
| Dysphagia screening: Dysphagia screening ought to be administered by the trained healthcare provider early after stroke onset before starting oral feeding to prevent pneumonia and other adverse events such as malnutrition, dehydration, and to reduce mortality                                                                                                                                                                                                                                                                                                                                                                                                                                                                                                                                                                                                                                                                                                                                                                                                                                                                                                                                                                                                                                                                                                                                                                                                                                               | WFNR      | LoE: 1<br>QoE: moderate<br>SoR: A+<br>[clinical reasoning] |                                                                                                                                                                                                        |                                                                                                                                            |                                                                                                                               |

|                                                                                                                                                                                                                                                                                                                                                                                                         |                 |                                                            |                                                                                                      |                                                                                                                            |                                                                                          |
|---------------------------------------------------------------------------------------------------------------------------------------------------------------------------------------------------------------------------------------------------------------------------------------------------------------------------------------------------------------------------------------------------------|-----------------|------------------------------------------------------------|------------------------------------------------------------------------------------------------------|----------------------------------------------------------------------------------------------------------------------------|------------------------------------------------------------------------------------------|
| Dysphagia Screening tools: One of the dysphagia screening tools that shows acceptable reliability, higher sensitivity, and negative predictive value, which consists of items such as alertness assessment, dry swallowing test, and direct swallowing test with water or semisolid and solid foods, should be used                                                                                     | WFNR            | LoE: 1<br>QoE: moderate<br>SoR: B+                         |                                                                                                      |                                                                                                                            |                                                                                          |
| Dysphagia screening is reasonable to be administered by a speech-language pathologist /therapist or other trained healthcare provider                                                                                                                                                                                                                                                                   | AHA             | Ila C                                                      | Multidisciplinary approach should include trained speech and swallowing therapist                    | Limited number of trained speech and swallowing therapist                                                                  | Financing training program, workshops and online materials for healthcare provider       |
| Assessment of swallowing before the patient begins eating, drinking, or receiving oral medications is recommended                                                                                                                                                                                                                                                                                       | AHA             | I B                                                        | Multidisciplinary approach should include trained speech and swallowing therapist                    | Limited number of trained speech and swallowing therapist                                                                  | Financing training program, workshops and online materials for healthcare provider       |
| An instrumental evaluation is probably indicated for those patients suspected of aspiration to verify the presence/absence of aspiration and to determine the physiological reasons for the dysphagia to guide the treatment plan                                                                                                                                                                       | AHA             | Ila B                                                      | Implementation of a dysphagia screening program for all stroke cases                                 | Major barriers to be surmounted include lack of awareness and low demand, absence of/or inadequate number of professionals | Financing training program, workshops and online materials for healthcare provider       |
| Selection of instrumental study (fibreoptic endoscopic evaluation of swallowing, video-fluoroscopy, fibreoptic endoscopic evaluation of swallowing with sensory testing) may be based on availability or other considerations                                                                                                                                                                           | AHA             | Iib C                                                      | Implementation of instrumental evaluation of dysphagia for stroke cases with positive screening test | Limited investigational tools and training programs                                                                        | Financing for instrumental tools and training program, workshops and online materials    |
| Instrumental assessment of dysphagia: Instrumental assessments such as video-fluoroscopic swallowing study, VFSS or fibreoptic endoscopic evaluation of swallowing, FEES ought to be performed to verify the aspiration and to set the appropriate dysphagia management plan in stroke patients who showed the risk for pharyngeal dysphagia or aspiration in the initial or ongoing swallowing screens | WFNR            | LoE: 1<br>QoE: moderate<br>SoR: A+<br>[clinical reasoning] |                                                                                                      |                                                                                                                            |                                                                                          |
| Oral hygiene care should be implemented to reduce the risk of pneumonia after stroke                                                                                                                                                                                                                                                                                                                    | WFNR            | LoE: 2<br>QoE: moderate<br>SoR: B+                         |                                                                                                      |                                                                                                                            |                                                                                          |
| Oral hygiene protocols should be implemented to reduce the risk of aspiration pneumonia after stroke                                                                                                                                                                                                                                                                                                    | AHA<br>Au<br>UK | I B<br>Strong<br>Nil                                       | Implementation of oral hygiene protocols for all stroke cases presented with swallowing problems     | Major barriers to be surmounted include lack of awareness and low demand, absence of/or inadequate number of professionals | Training program, workshops and online materials for healthcare providers and caregivers |
| All stroke patients, particularly those with swallowing difficulties, should have assistance and/or education to maintain good oral and dental (including dentures) hygiene<br>Staff and carers of stroke patients (in hospital, in residential care and home settings) should be trained in assessment and management of oral hygiene                                                                  |                 |                                                            |                                                                                                      |                                                                                                                            |                                                                                          |
| People with stroke, especially those who have difficulty swallowing or are tube fed, should have mouth care at least 3 times a day including:<br>– brushing of teeth and cleaning of gums with a suitable cleaning agent (toothpaste and/or chlorhexidine dental gel), for which an electric toothbrush should be considered<br>– removal of excess secretions<br>– application of lip balm             |                 |                                                            |                                                                                                      |                                                                                                                            |                                                                                          |
| People with stroke who have dentures should have their dentures:<br>– put in during the day<br>– cleaned regularly using a toothbrush, toothpaste and/or chlorhexidine dental gel                                                                                                                                                                                                                       |                 |                                                            |                                                                                                      |                                                                                                                            |                                                                                          |

– checked and replaced if ill-fitting, damaged or lost

People in hospital or living in a care home after stroke should receive mouth care from staff who have been trained in:

- assessment of oral hygiene
- selection and use of appropriate oral hygiene equipment and cleaning agents
- provision of oral care routines
- awareness and recognition of swallowing difficulties

People with stroke and their family/carers should receive information and training in mouth care and maintaining good oral hygiene before transfer of their care from hospital

|                                                                                                                                                                                                                                                                                          |                   |                                    |                                                                                                      |                                                                                                                            |                                                                                       |
|------------------------------------------------------------------------------------------------------------------------------------------------------------------------------------------------------------------------------------------------------------------------------------------|-------------------|------------------------------------|------------------------------------------------------------------------------------------------------|----------------------------------------------------------------------------------------------------------------------------|---------------------------------------------------------------------------------------|
| For stroke survivors with swallowing difficulties, behavioral approaches such as swallowing exercises, environmental modifications, safe swallowing advice, and appropriate dietary modifications should be used early                                                                   | Au<br>UK          | Strong<br><br>Nil                  | Multidisciplinary approach should include trained speech and swallowing therapist                    | Limited number of trained speech and swallowing therapist                                                                  | Financing for instrumental tools and training program, workshops and online materials |
| People with difficulties self-feeding after stroke should be assessed and provided with the appropriate equipment and assistance (including physical help and verbal encouragement) to promote independent and safe feeding                                                              |                   |                                    |                                                                                                      |                                                                                                                            |                                                                                       |
| Enteral feedings (tube feedings) should be initiated within 7 days after stroke for patients who cannot safely swallow                                                                                                                                                                   | AHA               | I A                                | Implementation of a dysphagia screening program for all stroke cases                                 | Major barriers to be surmounted include lack of awareness and low demand, absence of/or inadequate number of professionals | Financing training program, workshops and online materials for healthcare provider    |
| Enteral tube feeding:<br>Early enteral tube feeding should be implemented in stroke patients with dysphagia who cannot swallow safely and intake sufficient nutrition orally                                                                                                             | WFNR              | LoE: 1<br>QoE: moderate<br>SoR: B+ |                                                                                                      |                                                                                                                            |                                                                                       |
| Early gastrostomy within 4 weeks after stroke does not have to be prioritized over nasogastric tube feeding, unless there is a mandatory reason for percutaneous gastrostomy                                                                                                             | WFNR              | LoE: 1<br>QoE: low<br>SoR: 0       |                                                                                                      |                                                                                                                            |                                                                                       |
| Nasogastric tube feeding should be used for short term (2–3 weeks) nutritional support for patients who cannot swallow safely                                                                                                                                                            | AHA               | I B                                | Implementation of a dysphagia screening program for all stroke cases                                 | Major barriers to be surmounted include lack of awareness and low demand, absence of/or inadequate number of professionals | Financing training program, workshops and online materials for healthcare provider    |
| Percutaneous gastrostomy tubes should be placed in patients with chronic inability to swallow safely                                                                                                                                                                                     | AHA<br>UK<br>WFNR | I B<br><br>Nil                     | Implementation of instrumental evaluation of dysphagia for stroke cases with positive screening test | Limited investigational tools and training programs                                                                        | Financing for instrumental tools and training program, workshops and online materials |
| People with stroke should be considered for gastrostomy feeding if they:<br>– need but are unable to tolerate nasogastric tube feeding<br>– are unable to swallow adequate food and fluids orally by four weeks from the onset of stroke<br>– are at high long-term risk of malnutrition |                   |                                    |                                                                                                      |                                                                                                                            |                                                                                       |

|                                                                                                                                                                                                                                                                                                                                                                                                                                                                                                                                                                                                                                                                                                                                                     |           |                                                         |                                                                                                                                                                                  |                                                                    |                                                                                                                                 |
|-----------------------------------------------------------------------------------------------------------------------------------------------------------------------------------------------------------------------------------------------------------------------------------------------------------------------------------------------------------------------------------------------------------------------------------------------------------------------------------------------------------------------------------------------------------------------------------------------------------------------------------------------------------------------------------------------------------------------------------------------------|-----------|---------------------------------------------------------|----------------------------------------------------------------------------------------------------------------------------------------------------------------------------------|--------------------------------------------------------------------|---------------------------------------------------------------------------------------------------------------------------------|
| Nutritional supplements are reasonable to consider for patients who are malnourished or at risk of malnourishment                                                                                                                                                                                                                                                                                                                                                                                                                                                                                                                                                                                                                                   | AHA<br>UK | Ila B<br>Nil                                            | Multidisciplinary approach should include trained dietitian for specialist nutritional assessment, advice and monitoring for stroke cases with prolonged swallowing difficulties | Limited number of dietitians for specialist nutritional assessment | Financing coordinated programs between clinical neurologists and dietitians for stroke cases with prolonged swallowing problems |
| <p>People with stroke who require food or fluid of a modified consistency should:</p> <ul style="list-style-type: none"> <li>– be referred to a dietitian for specialist nutritional assessment, advice and monitoring</li> <li>– have the texture of modified food or fluids prescribed using nationally agreed descriptors</li> </ul> <p>People with stroke discharged from specialist care services with continuing problems meeting their nutritional needs should have their dietary intake and nutritional status monitored regularly</p> <p>People with stroke receiving end-of-life (palliative) care should not have burdensome restrictions imposed on oral food and/or fluid intake if those restrictions would exacerbate suffering</p> |           |                                                         |                                                                                                                                                                                  |                                                                    |                                                                                                                                 |
| Behavioural interventions for dysphagia treatment program including behavioral interventions should be provided for the dysphagia patients after stroke to prevent dysphagia-related complications and to recover the swallowing                                                                                                                                                                                                                                                                                                                                                                                                                                                                                                                    | WFNR      | LoE: 1<br>QoE: moderate<br>SoR: B+                      |                                                                                                                                                                                  |                                                                    |                                                                                                                                 |
| Neuromuscular electrical stimulation, NMES, can be used to improve the swallowing function in patients with dysphagia after stroke, combined with a traditional swallowing treatment program including behavioral interventions                                                                                                                                                                                                                                                                                                                                                                                                                                                                                                                     | WFNR      | LoE: 1<br>QoE: low<br>SoR: 0                            |                                                                                                                                                                                  |                                                                    |                                                                                                                                 |
| Acupuncture for dysphagia treatment: Acupuncture can be considered to treat post-stroke dysphagia                                                                                                                                                                                                                                                                                                                                                                                                                                                                                                                                                                                                                                                   | WFNR      | LoE: 1<br>QoE: low<br>SoR: 0                            |                                                                                                                                                                                  |                                                                    |                                                                                                                                 |
| rTMS for post stroke dysphagia: TMS can be considered to treat post-stroke dysphagia by the clinical expert in this field as an additional treatment modality to the traditional swallowing treatment, especially within 3 months post-stroke                                                                                                                                                                                                                                                                                                                                                                                                                                                                                                       | WFNR      | LoE: 1<br>QoE: low<br>SoR: 0                            |                                                                                                                                                                                  |                                                                    |                                                                                                                                 |
| Non-invasive ventilation: Non-invasive ventilation ought not to be used in patients with neurogenic dysphagia or prolonged reduced vigilance and a high risk of aspiration. In these patients, a blocked-off tracheostomy tube should remain as a portal for ventilator access until there is no danger of macro-aspiration                                                                                                                                                                                                                                                                                                                                                                                                                         | WFNR      | LoE: 5<br>QoE: very low<br>SoR: A- [clinical reasoning] |                                                                                                                                                                                  |                                                                    |                                                                                                                                 |
| Drug therapy, NMES, pharyngeal electrical stimulation, physical stimulation, tDCS, and transcranial magnetic stimulation are of uncertain benefit and not currently recommended                                                                                                                                                                                                                                                                                                                                                                                                                                                                                                                                                                     | AHA       | III A                                                   | Training                                                                                                                                                                         | Training                                                           | Training                                                                                                                        |
| Anodal tDCS over the left dorsolateral prefrontal cortex to improve language-based complex attention (working memory) remains experimental                                                                                                                                                                                                                                                                                                                                                                                                                                                                                                                                                                                                          | AHA       | III B                                                   | Training                                                                                                                                                                         | Training                                                           | Training                                                                                                                        |
| Active, contralesionally smooth pursuit eye movements reduce multimodal neglect (by reactivation of ipsi- and contralesional parietal cortices) and should be used to treat neglect                                                                                                                                                                                                                                                                                                                                                                                                                                                                                                                                                                 | WFNR      | LoE: 2b, 1b<br>QoE: moderate<br>SoR: B                  |                                                                                                                                                                                  |                                                                    |                                                                                                                                 |
| Repetitive neck muscle vibration, NMV realigns subjective straight-ahead direction (probably by activation of right perisylvian and insular cortices) and can be used to treat neglect                                                                                                                                                                                                                                                                                                                                                                                                                                                                                                                                                              | WFNR      | LoE: 2b<br>QoE: low<br>SoR: 0                           |                                                                                                                                                                                  |                                                                    |                                                                                                                                 |
| Re-directing gaze towards the neglected hemispace by temporary exposure to prisms inducing a rightward gaze shift (activates a cerebellar–cortical network and) can be used to treat neglect                                                                                                                                                                                                                                                                                                                                                                                                                                                                                                                                                        | WFNR      | LoE: 2b, 4<br>QoE: low<br>SoR: 0                        |                                                                                                                                                                                  |                                                                    |                                                                                                                                 |
| Patients are asked to lift horizontally extended wooden rods. If lifted too far to the right, the unbalanced rod gives direct feedback to the patient. Visuomotor feedback can be used to treat neglect                                                                                                                                                                                                                                                                                                                                                                                                                                                                                                                                             | WFNR      | LoE: 2b<br>QoE: low<br>SoR: 0                           |                                                                                                                                                                                  |                                                                    |                                                                                                                                 |

|                                                                                                                                                                                                                                                                                                                                                                                                       |                         |                                                      |                                                                                  |                                                          |                                                                                    |
|-------------------------------------------------------------------------------------------------------------------------------------------------------------------------------------------------------------------------------------------------------------------------------------------------------------------------------------------------------------------------------------------------------|-------------------------|------------------------------------------------------|----------------------------------------------------------------------------------|----------------------------------------------------------|------------------------------------------------------------------------------------|
| Action observation of healthy limb in a mirror promotes recovery of contralesional motor deficits (of the affected limb behind the mirror) and visuospatial neglect and can be used to treat neglect                                                                                                                                                                                                  | WFNR                    | LoE: 2b<br>QoE: low<br>SoR: 0                        |                                                                                  |                                                          |                                                                                    |
| Inhibitory rTMS of left parietal cortex reduces left-sided neglect (by reduction of interhemispheric imbalance) and can be used to treat neglect                                                                                                                                                                                                                                                      | WFNR                    | LoE: 2b<br>QoE: low<br>SoR: 0                        |                                                                                  |                                                          |                                                                                    |
| tDCS of parietal cortex (right-anodal or left-cathodal) has a potential of re-balancing interhemispheric imbalance<br>[Evidence insufficient for recommendation]                                                                                                                                                                                                                                      | WFNR                    | LoE: 4, 1b<br>QoE: very low                          |                                                                                  |                                                          |                                                                                    |
| Galvanic vestibular stimulation, GVS, improves visual neglect, tactile extinction, and arm position sense (by activation of vestibular thalamocortical system and multimodal brain regions) and can be used to treat neglect                                                                                                                                                                          | WFNR                    | LoE: 1b, 2b<br>QoE: low<br>SoR: 0                    |                                                                                  |                                                          |                                                                                    |
| Transcutaneous electrical nerve stimulation (TENS): Electric stimulation of contralesional neck (activates the right cerebral hemisphere) and can be used to treat neglect                                                                                                                                                                                                                            | WFNR                    | LoE: 1b, 4<br>QoE: low<br>SoR: 0                     |                                                                                  |                                                          |                                                                                    |
| Left-sided motor action shifts attention to the neglected side, concurrent electrical arm stimulation facilitates this, and can be used to treat neglect                                                                                                                                                                                                                                              | WFNR                    | LoE: 1b<br>QoE: low<br>SoR: 0                        |                                                                                  |                                                          |                                                                                    |
| Treatment of non-lateralized attention (sustained attention, alertness) has a potential to reduce neglect and motor deficits. [Evidence insufficient for recommendation]                                                                                                                                                                                                                              | WFNR                    | LoE: 4<br>QoE: very low                              |                                                                                  |                                                          |                                                                                    |
| Modulation of attention by different drugs have a potential to be helpful as an add-on treatment (not as a primary neglect therapy)<br>[Evidence insufficient for recommendation]                                                                                                                                                                                                                     | WFNR                    | LoE: 1a<br>QoE: very low                             |                                                                                  |                                                          |                                                                                    |
| Press-on (Fresnel) prism foils attached on the contralesional side of the two glasses of a conventional spectacle sparing the central (macular) visual field region have a potential to reduce shift gaze and attention to the neglected hemispace<br>[Evidence insufficient for recommendation]                                                                                                      | WFNR                    | LoE: 2b<br>QoE: very low<br>(mixed diagnostic group) |                                                                                  |                                                          |                                                                                    |
| <b>APHASIA</b>                                                                                                                                                                                                                                                                                                                                                                                        |                         |                                                      |                                                                                  |                                                          |                                                                                    |
| Recommendations: Aphasia<br>Speech and language therapy is recommended for individuals with aphasia                                                                                                                                                                                                                                                                                                   | AHA<br>Au<br>UK<br>WFNR | I A<br>Strong<br>Nil                                 | Multidisciplinary approach should include trained speech and language therapists | Limited number of trained speech and language therapists | Financing training program, workshops and online materials for healthcare provider |
| People with communication problems after stroke should be assessed by a speech and language therapist to diagnose the problem and to explain the nature and implications to the person, their family/carers and the multidisciplinary team. Reassessment in the first four months should only be undertaken if the results will affect decision-making or are required for mental capacity assessment |                         |                                                      |                                                                                  |                                                          |                                                                                    |
| People with communication problems after stroke should be assessed by a speech and language therapist to diagnose the problem and to explain the nature and implications to the person, their family/carers and the multidisciplinary team. Reassessment in the first four months should only be undertaken if the results will affect decision-making or are required for mental capacity assessment |                         |                                                      |                                                                                  |                                                          |                                                                                    |
| Published assessments of depression in aphasia can be considered                                                                                                                                                                                                                                                                                                                                      | WFNR                    | LoE: 2a<br>QoE: very low<br>SoR: 0                   |                                                                                  |                                                          |                                                                                    |

|                                                                                                                                                                                                                                                                                                                                                                                                                                                       |                    |                                                                        |                                                                                                       |                                                                                                                            |                                                                                                        |
|-------------------------------------------------------------------------------------------------------------------------------------------------------------------------------------------------------------------------------------------------------------------------------------------------------------------------------------------------------------------------------------------------------------------------------------------------------|--------------------|------------------------------------------------------------------------|-------------------------------------------------------------------------------------------------------|----------------------------------------------------------------------------------------------------------------------------|--------------------------------------------------------------------------------------------------------|
| Published assessments of speech and language should be used to provide a profile of the speech or language disorder in patients with a positive screening result                                                                                                                                                                                                                                                                                      | WFNR               | LoE: 2b<br>QoE: very low<br>SoR: B+ [clinical importance]              |                                                                                                       |                                                                                                                            |                                                                                                        |
| Speech and language therapy should be provided to people with aphasia as individually indicated to reduce communication difficulties and enhance functional communication                                                                                                                                                                                                                                                                             | WFNR               | LoE: 1a<br>QoE: very low to moderate<br>SoR: B+                        |                                                                                                       |                                                                                                                            |                                                                                                        |
| Constraint-induced aphasia therapy can be considered for the treatment of people with aphasia, especially when promotion of verbal communication activity is the aim                                                                                                                                                                                                                                                                                  | WFNR               | LoE: 1a<br>QoE: very low to low<br>SoR: 0                              |                                                                                                       |                                                                                                                            |                                                                                                        |
| Treatment for aphasia should include communication partner training                                                                                                                                                                                                                                                                                                                                                                                   | AHA<br>Ca          | I B<br>Evidence Level A).                                              | Comprehensive programs for speech and communication training involving caregivers for stroke patients | Major barriers to be surmounted include lack of awareness and low demand, absence of/or inadequate number of professionals | Financing coordinating programs, workshops and online materials for healthcare provider and caregivers |
| Treatment to improve functional communication should include Supported Conversation techniques for potential communication partners of the person with aphasia                                                                                                                                                                                                                                                                                        | ESAP<br>UK<br>WFNR | Nil<br>LoE: 1a<br>QoE: very low to low<br>SoR: B+ [clinical relevance] |                                                                                                       |                                                                                                                            |                                                                                                        |
| Language training in specific groups or with computer programs has also been reported to be beneficial                                                                                                                                                                                                                                                                                                                                                |                    |                                                                        |                                                                                                       |                                                                                                                            |                                                                                                        |
| In the first four months after stroke, people with aphasia should be given the opportunity to practise their language and communication with a speech and language therapist or other communication partner as frequently as tolerated                                                                                                                                                                                                                |                    |                                                                        |                                                                                                       |                                                                                                                            |                                                                                                        |
| After the first four months, people with communication problems after stroke should be reviewed to determine their suitability for further treatment with the aim of increasing participation in communication and social activities. This may involve using an assistant or volunteer, family member or communication partner guided by the speech and language therapist, computer-based practice or other impairment-based or functional treatment |                    |                                                                        |                                                                                                       |                                                                                                                            |                                                                                                        |
| People with communication problems after stroke should be considered for assistive technology and communication aids by an appropriately trained, experienced clinician                                                                                                                                                                                                                                                                               |                    |                                                                        |                                                                                                       |                                                                                                                            |                                                                                                        |
| People with aphasia after stroke whose first language is not English should be assessed and provided with information about aphasia and communication practice in their preferred language                                                                                                                                                                                                                                                            |                    |                                                                        |                                                                                                       |                                                                                                                            |                                                                                                        |
| The carers and family of a person with communication problems after stroke, and health and social care staff, should receive information and training from a speech and language therapist which should enable communication partners to optimize engagement in rehabilitation, and promote autonomy and social participation                                                                                                                         |                    |                                                                        |                                                                                                       |                                                                                                                            |                                                                                                        |
| People with persistent communication problems after stroke that limit their social activities should be offered information about local or national groups for people with aphasia, and referred as appropriate                                                                                                                                                                                                                                       |                    |                                                                        |                                                                                                       |                                                                                                                            |                                                                                                        |

|                                                                                                                                                                                                                                                                                                                                                                                  |             |                                                                    |                                       |                                                       |                                            |
|----------------------------------------------------------------------------------------------------------------------------------------------------------------------------------------------------------------------------------------------------------------------------------------------------------------------------------------------------------------------------------|-------------|--------------------------------------------------------------------|---------------------------------------|-------------------------------------------------------|--------------------------------------------|
| People with marked difficulty articulating words after stroke should be assessed for apraxia of speech and treated to maximize articulation of key words to improve speech intelligibility                                                                                                                                                                                       |             |                                                                    |                                       |                                                       |                                            |
| People with severe communication difficulties but good cognitive and language function after stroke should be assessed and provided with alternative or augmentative communication techniques or aids to supplement or compensate for limited speech                                                                                                                             |             |                                                                    |                                       |                                                       |                                            |
| Pharmacological therapy for aphasia. On the whole, drugs cannot yet be recommended to augment the effects of behavioral therapy for aphasia. Piracetam can be considered to improve aphasia, notably written language but further investigation of long-term effects and safety are needed                                                                                       | WFNR        | LoE: 1a<br>QoE: very low<br>SoR: 0                                 |                                       |                                                       |                                            |
| Aphasia therapy in the chronic phase therapy should be provided to people with aphasia who still wish to have therapy in the chronic phase post-stroke to improve their communication                                                                                                                                                                                            | WFNR        | LoE: 1a<br>QoE: very low to medium<br>SoR: B+ [clinical relevance] |                                       |                                                       |                                            |
| People with aphasia who want to improve their language and communication abilities should be offered intensive therapy of a long duration in both the acute and chronic stages post-stroke, if they can tolerate it                                                                                                                                                              | WFNR        | LoE: 1a<br>QoE: medium<br>SoR: B+ [clinical relevance]             |                                       |                                                       |                                            |
| Self-managed computerized therapy for word finding practice: Use of self-managed computerized therapy for word finding practice should be considered as a method for delivering repetitive practice to improve word finding ability. However, combination with additional techniques to promote functional use of newly learned vocabulary in conversation need to be considered | WFNR        | LoE: 1b<br>QoE: medium<br>SoR: B+                                  |                                       |                                                       |                                            |
| Organizational setting for aphasia therapy. Individual, one-to-one or group therapy from a qualified speech and language therapist, SLT, computer-mediated therapy and volunteer-supported therapy can all be considered for the provision of speech and language therapy                                                                                                        | WFNR        | LoE: 1a<br>QoE: very low<br>SoR: 0                                 |                                       |                                                       |                                            |
| Behavioral treatment approaches can be used to treat the impairment in apraxia of speech, AOS                                                                                                                                                                                                                                                                                    | WFNR        | LoE: 2a<br>QoE: very low<br>SoR: 0                                 |                                       |                                                       |                                            |
| tDCS or rTMS to enhance verbal production in aphasia can be considered                                                                                                                                                                                                                                                                                                           | WFNR        | LoE: 1a<br>QoE: low<br>SoR: 0                                      |                                       |                                                       |                                            |
| Augmentative and alternative modes of communication can be considered                                                                                                                                                                                                                                                                                                            | WFNR        | LoE: 2a<br>QoE: very low<br>SoR: 0                                 |                                       |                                                       |                                            |
| Communication partner training should be considered to facilitate communication                                                                                                                                                                                                                                                                                                  | WFNR        | LoE: 2a<br>QoE: very low to low<br>SoR: B+ [clinical relevance]    |                                       |                                                       |                                            |
| Licensing of specific medical devices needs to be considered based on regional regulatory affairs and safety standards ought to be followed                                                                                                                                                                                                                                      | WFNR        | LoE: 1a<br>QoE: high<br>SoR: A+                                    |                                       |                                                       |                                            |
| Intensive treatment is probably indicated, but there is no definitive agreement on the optimum amount, timing, intensity, distribution, or duration of treatment                                                                                                                                                                                                                 | AHA<br>WFNR | Ila A                                                              | Speech and language therapists needed | Large number of Speech and language therapists needed | Training of speech and language therapists |



|                                                                                                                                                                                                                                                                                                                                                                          |           |                                                                                                                 |                                                                                    |                                                          |                                                                                                                                         |
|--------------------------------------------------------------------------------------------------------------------------------------------------------------------------------------------------------------------------------------------------------------------------------------------------------------------------------------------------------------------------|-----------|-----------------------------------------------------------------------------------------------------------------|------------------------------------------------------------------------------------|----------------------------------------------------------|-----------------------------------------------------------------------------------------------------------------------------------------|
| Brain stimulation techniques as adjuncts to behavioral speech and language therapy are considered experimental and therefore are NOT currently recommended for routine use                                                                                                                                                                                               | AHA       | III B                                                                                                           | Training                                                                           | Training                                                 | Training                                                                                                                                |
| Recommendations: Motor Speech Disorders: Dysarthria and Apraxia of Speech Class Level of Evidence, Interventions for motor speech disorders should be individually tailored and can include behavioral techniques and strategies that target:                                                                                                                            | AHA       | I B                                                                                                             | Multidisciplinary approach should include trained speech and language therapists   | Limited number of trained speech and language therapists | Financing coordinated programs between clinical neurologists and Speech and Language Therapists for stroke cases with speech impairment |
| Physiological support for speech, including respiration, phonation, articulation, and resonance<br>Global aspects of speech production such as loudness, rate, and prosody<br>Augmentative and alternative communication devices and modalities should be used to supplement speech                                                                                      | AHA       | I C                                                                                                             | Comprehensive speech therapy program                                               | Limited number of trained speech and language therapists | Financing coordinating programs, workshops and online materials for healthcare provider                                                 |
| <b>SPASTICITY</b>                                                                                                                                                                                                                                                                                                                                                        |           |                                                                                                                 |                                                                                    |                                                          |                                                                                                                                         |
| Recommendations: Spasticity Class<br>Level of evidence<br>Targeted injection of botulinum toxin into localized upper limb muscles is recommended to reduce spasticity, to improve passive or active range of motion, and to improve dressing, hygiene, and limb positioning                                                                                              | AHA       | I A                                                                                                             | Multidisciplinary approach should include trained neurologists for Botox injection | Limited number of trained neurologists                   | Financing training programs, workshops and online materials for clinical neurologists                                                   |
| For patients with spastic equinovarus deformity injections of botulinum toxin A should be considered to reduce the need of supportive devices in the chronic phase after stroke                                                                                                                                                                                          | WFNR      | LoE: 1b<br>QoE: moderate<br>SoR: B+                                                                             |                                                                                    |                                                          |                                                                                                                                         |
| BoNT-A therapy should be considered for clinically relevant upper limb PSS that does not sufficiently respond to nonpharmacological treatment. In these cases, it should be entertained when the therapeutic goal is to support passive functions (prevention of contractures; hygiene, washing, dressing) and can be used in selected cases to support active function. | WFNR      | Passive function<br>LoE: 1a<br>QoE: moderate<br>SoR: B+<br><br>Active function<br>LoE: 1a<br>QoE: low<br>SoR: 0 |                                                                                    |                                                          |                                                                                                                                         |
| BoNT-A therapy can be considered for clinically relevant lower limb post-stroke spasticity, PSS (ankle, knee, or hip) that does not sufficiently respond to nonpharmacological treatment (level of evidence 1b, quality of evidence moderate, 0 (functional benefit uncertain))<br>It is also an option to treat functionally relevant sustained clonus                  | WFNR      | LoE: 3a<br>QoE: low<br>SoR: 0                                                                                   |                                                                                    |                                                          |                                                                                                                                         |
| Instrumental injection guidance for BoNT-A Both ultrasound, US, electrical stimulation, ES, and EMG guidance can be used and are especially relevant when smaller or deeper muscles are injected                                                                                                                                                                         | WFNR      | LoE: 2a<br>QoE: low<br>SoR: 0                                                                                   |                                                                                    |                                                          |                                                                                                                                         |
| Anatomical injection guidance for BoNT-A the injection of larger superficial muscles, non-instrumented manual needle placement can be adequate                                                                                                                                                                                                                           | WFNR      | LoE: 2a<br>QoE: low<br>SoR: 0                                                                                   |                                                                                    |                                                          |                                                                                                                                         |
| Targeted injection of botulinum toxin into lower limb muscles is recommended to reduce spasticity that interferes with gait function. Chemodenervation using botulinum toxin can be used to reduce spasticity, increase range of motion, and improve gait, for patients with focal and/or symptomatically distressing spasticity                                         | AHA<br>Ca | I A<br>Evidence<br>Level: Early-Level C; Late-Level A).                                                         | Multidisciplinary approach should include trained neurologists for Botox injection | Limited number of trained neurologists                   | Financing training programs, workshops and online materials for clinical neurologists                                                   |

|                                                                                                                                                                                                                                                                                                                                                                                                                                                                                                                                                                                                                                                                                                                                                                                                                                                                                                                                                                                                                                                                                                                                                                                                                                                                                                                                                                                                                                             |      |                                                                        |                                                                                         |                                                                |                                                                                           |
|---------------------------------------------------------------------------------------------------------------------------------------------------------------------------------------------------------------------------------------------------------------------------------------------------------------------------------------------------------------------------------------------------------------------------------------------------------------------------------------------------------------------------------------------------------------------------------------------------------------------------------------------------------------------------------------------------------------------------------------------------------------------------------------------------------------------------------------------------------------------------------------------------------------------------------------------------------------------------------------------------------------------------------------------------------------------------------------------------------------------------------------------------------------------------------------------------------------------------------------------------------------------------------------------------------------------------------------------------------------------------------------------------------------------------------------------|------|------------------------------------------------------------------------|-----------------------------------------------------------------------------------------|----------------------------------------------------------------|-------------------------------------------------------------------------------------------|
| BoNT-A therapy can be considered to treat spasm-related and stretch- or exercise-induced spasticity-associated pain in spastic limb segments, both in the upper or lower extremity                                                                                                                                                                                                                                                                                                                                                                                                                                                                                                                                                                                                                                                                                                                                                                                                                                                                                                                                                                                                                                                                                                                                                                                                                                                          | WFNR | LoE: 1b<br>QoE: low [partially indirect]<br>SoR: 0                     |                                                                                         |                                                                |                                                                                           |
| Substantial difficulties to integrate a plegic and severely spastic arm in daily activities and spasticity-associated pain should trigger the evaluation of a botulinum neurotoxin A, BoNT-A treatment of the affected muscle groups                                                                                                                                                                                                                                                                                                                                                                                                                                                                                                                                                                                                                                                                                                                                                                                                                                                                                                                                                                                                                                                                                                                                                                                                        | WFNR | LoE: 1a<br>QoE: moderate<br>SoR: B+                                    |                                                                                         |                                                                |                                                                                           |
| NMES as adjuvant treatment for BoNT-A Neuromuscular electrostimulation. NMES applied for 3 to 5 days after BoNT-A therapy can be considered to enhance treatment effects in treated muscle groups                                                                                                                                                                                                                                                                                                                                                                                                                                                                                                                                                                                                                                                                                                                                                                                                                                                                                                                                                                                                                                                                                                                                                                                                                                           | WFNR | LoE: 1a<br>QoE: low (risk of bias)<br>SoR: 0                           |                                                                                         |                                                                |                                                                                           |
| Adjuvant treatment for BoNT-A Safety aspects for the medical products used need to be taken into account. Other adjuvant therapies such as casting taping, mCIMT, and dynamic splint treatment can be used as individually indicated                                                                                                                                                                                                                                                                                                                                                                                                                                                                                                                                                                                                                                                                                                                                                                                                                                                                                                                                                                                                                                                                                                                                                                                                        | WFNR | LoE: 1a<br>QoE: very low (risk of bias, inconsistency)<br>SoR: 0       |                                                                                         |                                                                |                                                                                           |
| Phenol and alcohol neurolysis. Phenol and alcohol neurolysis can be considered for clinically relevant PSS that does not sufficiently respond to nonpharmacological treatment (and oral medication), especially when BoNT-A treatment is not feasible                                                                                                                                                                                                                                                                                                                                                                                                                                                                                                                                                                                                                                                                                                                                                                                                                                                                                                                                                                                                                                                                                                                                                                                       | WFNR | LoE: 2b<br>QoE: low<br>SoR: 0                                          |                                                                                         |                                                                |                                                                                           |
| I Intrathecal baclofen, ITB for PSS Intrathecal baclofen. ITB can be considered for clinically relevant severe segmental or generalized PSS that does not sufficiently respond to other interventions                                                                                                                                                                                                                                                                                                                                                                                                                                                                                                                                                                                                                                                                                                                                                                                                                                                                                                                                                                                                                                                                                                                                                                                                                                       | WFNR | LoE: 1b<br>QoE: moderate<br>SoR: 0 [benefit risk for harm assessment]  |                                                                                         |                                                                |                                                                                           |
| Organization of ITB treatment. ITB treatment ought to be tested, initiated, adjusted, and monitored with long-term support (including emergency work-up when indicated) by physicians experienced with the treatment                                                                                                                                                                                                                                                                                                                                                                                                                                                                                                                                                                                                                                                                                                                                                                                                                                                                                                                                                                                                                                                                                                                                                                                                                        | WFNR | LoE: 1b<br>QoE: moderate<br>SoR: A+ [benefit risk for harm assessment] |                                                                                         |                                                                |                                                                                           |
| People with motor weakness after stroke should be assessed for spasticity as a cause of pain, as a factor limiting activities or care, and as a risk factor for the development of contractures<br>B People with stroke should be supported to set and monitor specific goals for interventions for spasticity using appropriate clinical measures for ease of care, pain and/or range of movement<br>C People with spasticity after stroke should be monitored to determine the extent of the problem and the effect of simple measures to reduce spasticity e.g., positioning, passive movement, active movement (with monitoring of the range of movement and alteration in function) and/or pain control<br>D People with persistent or progressive focal spasticity after stroke affecting one or two areas for whom a therapeutic goal can be identified (e.g., ease of care, pain) should be offered intramuscular botulinum toxin. This should be within a specialist multidisciplinary team and be accompanied by rehabilitation therapy and/or splinting or casting for up to 12 weeks after the injections. Goal attainment should be assessed 3-4 months after the injections and further treatment planned according to response<br>E People with generalized or diffuse spasticity after stroke should be offered treatment with skeletal muscle relaxants (e.g., baclofen, tizanidine) and monitored for adverse effects, in | UK   | Nil                                                                    | Multidisciplinary approach should include spasticity service with trained professionals | Limited number of trained professionals for spasticity service | Financing coordinated programs with spasticity service professionals for post-stroke care |

|                                                                                                                                                                                                                                                                                                                                                                                                                                                                                                                                                                                                                             |  |                                                        |                                     |                                                                                         |                                                                |                                                                                           |
|-----------------------------------------------------------------------------------------------------------------------------------------------------------------------------------------------------------------------------------------------------------------------------------------------------------------------------------------------------------------------------------------------------------------------------------------------------------------------------------------------------------------------------------------------------------------------------------------------------------------------------|--|--------------------------------------------------------|-------------------------------------|-----------------------------------------------------------------------------------------|----------------------------------------------------------------|-------------------------------------------------------------------------------------------|
| particular sedation and increased weakness. Combinations of antispasticity drugs should only be initiated by healthcare professionals with specific expertise in managing spasticity                                                                                                                                                                                                                                                                                                                                                                                                                                        |  |                                                        |                                     |                                                                                         |                                                                |                                                                                           |
| F People with stroke should only receive intrathecal baclofen, intraneural phenol or similar interventions in the context of a specialist multidisciplinary spasticity service                                                                                                                                                                                                                                                                                                                                                                                                                                              |  |                                                        |                                     |                                                                                         |                                                                |                                                                                           |
| G People with stroke with increased tone that is reducing passive or active movement around a joint should have the range of passive joint movement assessed. They should only be offered splinting or casting following individualized assessment and with monitoring by appropriately skilled staff                                                                                                                                                                                                                                                                                                                       |  |                                                        |                                     |                                                                                         |                                                                |                                                                                           |
| H People with stroke should not be routinely offered splinting for the arm and hand                                                                                                                                                                                                                                                                                                                                                                                                                                                                                                                                         |  |                                                        |                                     |                                                                                         |                                                                |                                                                                           |
| It is important to keep in mind that spasticity could be one component of motor impairments and clinical problems following stroke and may contribute to reduction in activities of daily living and quality of life in about 10–12% of chronic stroke survivors. Spasticity should be classified according to the topical distribution as focal, multifocal, segmental, hemispastic, paraspastic, or as generalized spasticity. It should primarily be assessed and documented by standardized validated clinical assessment scales such as the Ashworth Scale, AS, modified Ashworth Scale MAS, or the Tardieu scale, TS. |  | AS, mAS<br>LoE: 2a<br>QoE:<br>moderate<br>SoR: B+      |                                     |                                                                                         |                                                                |                                                                                           |
|                                                                                                                                                                                                                                                                                                                                                                                                                                                                                                                                                                                                                             |  | TS:<br>LoE: 2b<br>QoE: low<br>SoR: 0                   |                                     |                                                                                         |                                                                |                                                                                           |
| An important component of assessment and management decision-making is arriving at treatment goals. Identifying goals that are mutually agreed upon by the patient, caregiver, and clinician a priori should be an important step in spasticity treatment decision-making.                                                                                                                                                                                                                                                                                                                                                  |  | LoE: 2b<br>QoE:<br>moderate<br>SoR: B+                 |                                     |                                                                                         |                                                                |                                                                                           |
| Oral antispasticity agents can be useful for generalized spastic dystonia but may result in dose-limiting sedation or other side effects.                                                                                                                                                                                                                                                                                                                                                                                                                                                                                   |  | AHA                                                    | Ila A                               | Multidisciplinary approach should include spasticity service with trained professionals | Limited number of trained professionals for spasticity service | Financing coordinated programs with spasticity service professionals for post-stroke care |
| Oral systemic medications can be used for segmental and generalized spasticity but may be associated with dose-dependent adverse effects.                                                                                                                                                                                                                                                                                                                                                                                                                                                                                   |  | LoE: 2b<br>QoE: low<br>SoR: 0                          |                                     |                                                                                         |                                                                |                                                                                           |
| Selection of type of oral medication depends on individual circumstances and may include combinations. These medications should be titrated slowly, and both clinical benefits and unwanted effects need to be monitored.                                                                                                                                                                                                                                                                                                                                                                                                   |  | LoE: 1a<br>QoE: low<br>SoR: B+<br>[clinical reasoning] |                                     |                                                                                         |                                                                |                                                                                           |
| The use of splints and taping are NOT recommended for prevention of wrist and finger spasticity after stroke                                                                                                                                                                                                                                                                                                                                                                                                                                                                                                                |  | AHA                                                    | III B                               | Training                                                                                | Training                                                       | Training                                                                                  |
| Splints and other orthoses used to immobilize joints (recovery): Using splints and other orthoses to intermittently immobilize joints, e.g., the wrist of the severely affected arm or shoulder strapping (glenohumeral, scapulo-thoracic), does not facilitate motor recovery and should not be used for this therapeutic goal                                                                                                                                                                                                                                                                                             |  | WFNR                                                   | LoE: 1a<br>QoE: moderate<br>SoR: B- |                                                                                         |                                                                |                                                                                           |

|                                                                                                                                                                                                                                                                                                                                    |      |                                         |
|------------------------------------------------------------------------------------------------------------------------------------------------------------------------------------------------------------------------------------------------------------------------------------------------------------------------------------|------|-----------------------------------------|
| In the chronic stage, an orthosis with or without electrical stimulation should be applied in appropriate patients if available to support gait velocity as an assistive device (indirect effect)                                                                                                                                  | WFNR | LoE: 1b<br>QoE: moderate<br>SoR: B+     |
| Intensive task specific strength-endurance training, gait training with acoustic rhythmic stimulation or task specific with additional cognitive elements (e.g., motor imagery, motor observation, knowledge of result, acoustic feedback, dual tasks) can also be used in the subacute and chronic stage to improve gait velocity | WFNR | LoE: 2b<br>QoE: low<br>SoR: 0           |
|                                                                                                                                                                                                                                                                                                                                    | WFNR |                                         |
| In order to increase walking distance in patients who can walk independently with or without an aid or with little help task- and goal-specific endurance training ought to be performed, especially in the subacute phase after stroke                                                                                            | WFNR | LoE: 2b-1a<br>QoE: high<br>SoR: A+      |
| If this is not possible, an intensive gait training with or without a use of a treadmill (especially progressive aerobic treadmill training), or an intensive supervised home training program (strength, endurance, and balance training) with progression should be performed in the subacute stage                              | WFNR | LoE: 2b, 1b<br>QoE: moderate<br>SoR: B+ |
| In the chronic stage, task-specific endurance training, e.g., progressive aerobic treadmill training should be performed                                                                                                                                                                                                           | WFNR | LoE: 1b<br>QoE: moderate<br>SoR: B+     |
| Splints and other orthoses used to immobilize joints (pain): It can be used to prevent or treat pain associated with severe paresis at these joints                                                                                                                                                                                | WFNR | LoE: 1a<br>QoE: low<br>SoR: 0           |
| Intensive task specific strength-endurance training, gait training with acoustic rhythmic stimulation or task specific with additional cognitive elements (e.g., motor imagery, motor observation, knowledge of result, acoustic feedback, dual tasks) can also be used in the subacute and chronic stage to improve gait velocity | WFNR | LoE: 2b<br>QoE: low<br>SoR: 0           |
| Surgical procedures for PSS In individual cases, after careful examination in the multi-professional team and exhaustion of other reversible treatment options for spastic movement disorder, surgical procedures may be considered as treatment option in chronic spastic movement disorder following stroke                      | WFNR | LoE: 4<br>QoE: very low<br>SoR: 0       |

#### BALANCE

|                                                                                                                                                                                                                                                                   |                 |                                   |                                                                             |                                                        |                                                                          |
|-------------------------------------------------------------------------------------------------------------------------------------------------------------------------------------------------------------------------------------------------------------------|-----------------|-----------------------------------|-----------------------------------------------------------------------------|--------------------------------------------------------|--------------------------------------------------------------------------|
| Individuals with stroke should be evaluated for balance, balance confidence, and fall risk                                                                                                                                                                        | AHA             | I C                               | Neurologists, physiotherapists are required for balance and fall evaluation | Need large number of neurologists and physiotherapists | Recommend training of more neurologists and physiotherapists globally    |
| Individuals with stroke who have poor balance, low balance confidence, and fear of falls or are at risk for falls should be provided with a balance training program                                                                                              | AHA<br>Ca<br>Ne | I A<br>Evidence Level A (Level 1) | Physiotherapists are required for balance training                          | Need large number of physiotherapists                  | Recommend training of more physiotherapists for stroke patients globally |
| For patients with balance disorders post stroke, balance training should be offered                                                                                                                                                                               |                 |                                   |                                                                             |                                                        |                                                                          |
| It has been demonstrated that exercising postural control with visual feedback while standing on a force platform improves the postural sway in stance of patients with a stroke<br>Studied for early and chronic rehabilitation                                  |                 |                                   |                                                                             |                                                        |                                                                          |
| It has been demonstrated that exercising balance during various activities results in improved sitting and standing balance and improved performance of basic activities of daily living by stroke patients<br>Studied for early, late and chronic rehabilitation |                 |                                   |                                                                             |                                                        |                                                                          |

|                                                                                                                                                                                                                                                                                                                                                                                                                                                                                                                                                                                                                                                                                                                                                                                                                                                                                                                                                                                                                                                                                                                                                                                                                                                                                                                                                               |                               |                                           |                                                              |                                       |                                                                          |
|---------------------------------------------------------------------------------------------------------------------------------------------------------------------------------------------------------------------------------------------------------------------------------------------------------------------------------------------------------------------------------------------------------------------------------------------------------------------------------------------------------------------------------------------------------------------------------------------------------------------------------------------------------------------------------------------------------------------------------------------------------------------------------------------------------------------------------------------------------------------------------------------------------------------------------------------------------------------------------------------------------------------------------------------------------------------------------------------------------------------------------------------------------------------------------------------------------------------------------------------------------------------------------------------------------------------------------------------------------------|-------------------------------|-------------------------------------------|--------------------------------------------------------------|---------------------------------------|--------------------------------------------------------------------------|
| Repetitive task training is a therapeutic option when improvement of arm activities is the therapeutic goal                                                                                                                                                                                                                                                                                                                                                                                                                                                                                                                                                                                                                                                                                                                                                                                                                                                                                                                                                                                                                                                                                                                                                                                                                                                   | WFNR                          | LoE: 1a<br>QoE: moderate<br>SoR: 0        |                                                              |                                       |                                                                          |
| A three-week course of daily arm ability training should be considered when improvement of sensorimotor skilfulness (e.g., dexterity) is the therapeutic goal for patients with mild-to-moderate arm paresis                                                                                                                                                                                                                                                                                                                                                                                                                                                                                                                                                                                                                                                                                                                                                                                                                                                                                                                                                                                                                                                                                                                                                  | WFNR                          | LoE: 1b<br>QoE: moderate<br>SoR: B+       |                                                              |                                       |                                                                          |
| <b>MOBILITY</b>                                                                                                                                                                                                                                                                                                                                                                                                                                                                                                                                                                                                                                                                                                                                                                                                                                                                                                                                                                                                                                                                                                                                                                                                                                                                                                                                               |                               |                                           |                                                              |                                       |                                                                          |
| Recommendations: Mobility<br>Intensive, repetitive, mobility- task training is recommended for all individuals with gait limitations after stroke                                                                                                                                                                                                                                                                                                                                                                                                                                                                                                                                                                                                                                                                                                                                                                                                                                                                                                                                                                                                                                                                                                                                                                                                             | AHA<br>Ca<br>ESAP<br>Ne<br>UK | I A<br>Evidence Level A<br>Level 1<br>Nil | Physiotherapists are required for mobility and gait training | Need large number of physiotherapists | Recommend training of more physiotherapists for stroke patients globally |
| Task and goal-oriented training that is repetitive and progressively adapted should be used to improve performance of selected lower-extremity tasks such as walking distance and speed and sit to stand                                                                                                                                                                                                                                                                                                                                                                                                                                                                                                                                                                                                                                                                                                                                                                                                                                                                                                                                                                                                                                                                                                                                                      |                               |                                           |                                                              |                                       |                                                                          |
| It has been demonstrated that training specific skills, such as exercising balance while standing and reaching to grasp objects, has a favourable effect on the specific skill being trained by stroke patients, in all phases of rehabilitation<br>People with loss of movement and/or ataxia after stroke sufficient to limit their activities should be assessed by a physiotherapist with experience in neurological rehabilitation<br>People with loss of movement and/or ataxia after stroke should be taught task-specific, repetitive, intensive exercises or activities that will increase strength<br>People with impaired sitting balance after stroke should receive trunk training exercises<br>People with significant impairment of their balance and walking ability after stroke should receive progressive balance training, functional task-specific training, lower limb strengthening exercises and be considered for an ankle-foot orthosis<br>People with moderate to severe limitation of their walking ability after stroke should be assessed for a walking aid to improve their stability<br>People with stroke who are able to walk with or without assistance should undergo task specific walking training with a cardiorespiratory and/or muscle strength focus at sufficient intensity to improve endurance and walking speed |                               |                                           |                                                              |                                       |                                                                          |
| People with limited ability to walk after stroke should be assessed by a physiotherapist with experience in neurological rehabilitation to guide management                                                                                                                                                                                                                                                                                                                                                                                                                                                                                                                                                                                                                                                                                                                                                                                                                                                                                                                                                                                                                                                                                                                                                                                                   |                               |                                           |                                                              |                                       |                                                                          |
| People with limited mobility after stroke should be assessed, provided with and trained in how to use appropriate mobility aids including a wheelchair to enable safe independent mobility                                                                                                                                                                                                                                                                                                                                                                                                                                                                                                                                                                                                                                                                                                                                                                                                                                                                                                                                                                                                                                                                                                                                                                    |                               |                                           |                                                              |                                       |                                                                          |
| In the chronic stage an orthosis with electrical peroneal stimulation should be applied as an assistive device to improve walking distance (indirect effect) if indicated and available                                                                                                                                                                                                                                                                                                                                                                                                                                                                                                                                                                                                                                                                                                                                                                                                                                                                                                                                                                                                                                                                                                                                                                       | WFNR                          | LoE: 1b<br>QoE: moderate<br>SoR: B+       |                                                              |                                       |                                                                          |
| Elements of cognitive training (motor imagery, motor observation), additional stimulation techniques (peroneal stimulation, functional electrical stimulation) can also enhance walking distance and can be used in the subacute and chronic phase                                                                                                                                                                                                                                                                                                                                                                                                                                                                                                                                                                                                                                                                                                                                                                                                                                                                                                                                                                                                                                                                                                            | WFNR                          | LoE: 2b, 1b<br>QoE: low<br>SoR: 0         |                                                              |                                       |                                                                          |

|                                                                                                                                                                                                                                                                                                                                                                                                                                                                                                                                                     |           |                                                            |                                    |                                                              |                                                              |
|-----------------------------------------------------------------------------------------------------------------------------------------------------------------------------------------------------------------------------------------------------------------------------------------------------------------------------------------------------------------------------------------------------------------------------------------------------------------------------------------------------------------------------------------------------|-----------|------------------------------------------------------------|------------------------------------|--------------------------------------------------------------|--------------------------------------------------------------|
| Dedicated training: A dedicated active arm motor control training of at least 2 h per week over several weeks ought to be provided when acceleration of arm motor recovery is intended post-stroke                                                                                                                                                                                                                                                                                                                                                  | WFNR      | LoE: 1a<br>QoE: high<br>SoR: A+                            |                                    |                                                              |                                                              |
| Training time per day (subacute): Increasing the therapy time up to 3 h per day can create a benefit in the subacute stage and can be considered individually                                                                                                                                                                                                                                                                                                                                                                                       | WFNR      | LoE: 1b<br>QoE: moderate<br>SoR: 0                         |                                    |                                                              |                                                              |
| Training time per week (chronic): At least 3 h per week of dedicated active arm motor rehabilitation (including circuit class approaches and the use of training apparatuses or home practice with intermittent supervision) with regular evaluation of therapeutic progress are recommended for prolonged therapy in the chronic stage when improvements at impairment or activity level are intended and can be observed                                                                                                                          | WFNR      | LoE: 1b<br>QoE: moderate<br>SoR: B+                        |                                    |                                                              |                                                              |
| Organization of training: Depending on individual circumstances (patient and service) the following should be entertained as therapeutic options: (I) one-to-one therapy, (II) circuit class training that can integrate the use of passive training apparatuses, and (III) intermittently supervised home training, the latter ideally with dedicated training manuals for patients with mild, moderate, or severe paresis, respectively, with a focus on repetitive impairment- and activity-oriented training, and documentation of the training | WFNR      | LoE: 1b<br>QoE: moderate<br>SoR: B+                        |                                    |                                                              |                                                              |
| Strategy when prognosis is very poor: In cases with an individually very poor prediction (complete paralysis with diagnosed severe corticospinal tract damage (loss of motor evoked potentials (MEP) with transcranial magnetic stimulation (TMS), posterior limb of internal capsule damage on MRI diffusion tensor imaging (DTI)), a therapeutic focus on prevention of secondary complications (only) for the plegic arm and teaching compensatory strategies with the non-paretic arm can be considered already early after stroke              | WFNR      | LoE: 2b<br>QoE: low<br>[imprecision]<br>SoR: 0             |                                    |                                                              |                                                              |
| rTMS for arm rehabilitation Contralesional low frequency, LF rTMS or ipsilesional high frequency, HF rTMS or intermittent theta burst stimulation, iTBS of the primary hand motor cortex (e.g., five sessions) can be considered as adjunct therapy by experienced personnel when available and when used within safety guidelines, preferably early after stroke                                                                                                                                                                                   | WFNR      | LoE: 1a<br>QoE: moderate<br>SoR: 0 [resource implications] |                                    |                                                              |                                                              |
| Individuals with stroke should be prescribed and fit with an assistive device or orthosis if appropriate to improve balance                                                                                                                                                                                                                                                                                                                                                                                                                         | AHA<br>Ca | I A<br>(Evidence Level: Early-Level A; Late-Level A).      | Physiotherapists; orthotic devices | Need large number of physiotherapists; Need orthotic devices | Training of physiotherapists, production of orthotic devices |
| Conventional gait training combined with training using mechanical devices (treadmill, end-effector device, or exoskeleton), strength and endurance training, training to stand on an unstable or progressively smaller support base, acoustic feedback during walking, and orthopaedic shoe when indicated may also improve balance in the subacute and chronic stages after stroke and can be used                                                                                                                                                | WFNR      | LoE: 1b, 2b<br>QoE: low<br>SoR: 0                          |                                    |                                                              |                                                              |
| Dynamic balance training as an integral part of an intensive gait training In order to improve balance in the subacute stage after stroke and reduce the number of falls in patients who can walk independently with or without an aid or with little help dynamic balance training should be performed as an integral part of an intensive gait training                                                                                                                                                                                           | WFNR      | LoE: 1b<br>QoE: moderate<br>SoR: B+                        |                                    |                                                              |                                                              |
| An intensive supervised home training program with progression and a motor relearning program have the same quality of evidence support for their use in the subacute stage after stroke and should be considered to improve balance in the subacute stage                                                                                                                                                                                                                                                                                          | WFNR      | LoE: 1b<br>QoE: moderate<br>SoR: B+                        |                                    |                                                              |                                                              |

|                                                                                                                                                                                                                                                                                                                                                                                                                                                                                                                                                                                                                                                                                                                                                                                                                                                                                                     |                 |                                                                       |                                                                                  |                                                                                                                   |                                                                                                                                                                                                                                              |
|-----------------------------------------------------------------------------------------------------------------------------------------------------------------------------------------------------------------------------------------------------------------------------------------------------------------------------------------------------------------------------------------------------------------------------------------------------------------------------------------------------------------------------------------------------------------------------------------------------------------------------------------------------------------------------------------------------------------------------------------------------------------------------------------------------------------------------------------------------------------------------------------------------|-----------------|-----------------------------------------------------------------------|----------------------------------------------------------------------------------|-------------------------------------------------------------------------------------------------------------------|----------------------------------------------------------------------------------------------------------------------------------------------------------------------------------------------------------------------------------------------|
| <p>An ankle foot orthosis after stroke is recommended in individuals with remediable gait impairments (e.g., foot drop) to compensate for foot drop and to improve mobility and paretic ankle and knee kinematics, kinetics, and energy cost of walking</p> <p>Ankle-foot orthoses should be used on selected patients with foot drop following proper assessment and with follow-up to verify its effectiveness</p> <p>People with stroke who have compromised ankle/foot stability and/or reduced ability to dorsiflex the foot ('foot-drop') that impedes safe and efficient walking should be offered an ankle-foot orthosis to improve walking and balance. The orthosis should be evaluated and individually fitted before long-term use</p>                                                                                                                                                  | AHA<br>Ca       | I A<br>Evidence Level A                                               | Physiotherapists; orthotic devices                                               | Need large number of physiotherapists; Need orthotic devices                                                      | Training of physiotherapists, production of orthotic devices                                                                                                                                                                                 |
| <p>UK</p> <p>Nil</p>                                                                                                                                                                                                                                                                                                                                                                                                                                                                                                                                                                                                                                                                                                                                                                                                                                                                                |                 |                                                                       |                                                                                  |                                                                                                                   |                                                                                                                                                                                                                                              |
| <p>Group therapy with circuit training is a reasonable approach to improve walking. Stroke survivors with difficulty walking should be given the opportunity to undertake tailored repetitive practice of walking (or components of walking) as much as possible</p> <p>Circuit class training for walking and other mobility-related functions and activities: It has been demonstrated that circuit class training (CCT) for walking and other mobility-related functions and activities improves walking distance/speed, sitting and standing balance and walking ability, and reduces inactivity in patients with a stroke</p> <p>Walking distance/speed studied for ER, LR and RC, sitting and standing balance for ER, LR and RC, walking ability for ER, LR, and RC, and inactivity for LR and RC</p>                                                                                        | AHA<br>Au<br>Ne | Ila A<br>Strong recommendation (Level 1)                              | Physiotherapists needed to provide circuit training.                             | Need large number of physiotherapists                                                                             | Training of physiotherapists                                                                                                                                                                                                                 |
| <p>For stroke survivors who have difficulty sitting, practicing reaching beyond arm's length while sitting with supervision/assistance should be undertaken</p> <p>For stroke survivors who have difficulty in standing up from a chair, practice of standing up should be undertaken</p> <p>For stroke survivors who have difficulty standing, task-specific practice of standing balance should be provided. Strategies could include:<br/>practicing functional tasks while standing<br/>walking training that includes challenge to standing balance (e.g., overground walking, obstacle courses)</p>                                                                                                                                                                                                                                                                                           | Au              | Strong                                                                | Physiotherapists needed                                                          | Need large number of physiotherapists                                                                             | Training of physiotherapists, globally                                                                                                                                                                                                       |
| <p>It has been demonstrated that body weight supported treadmill training improves the comfortable walking speed and walking distance of patients with a stroke. Studied for early and chronic rehabilitation</p> <p>It has been demonstrated that treadmill training without body-weight support is more effective in increasing maximum walking speed and width of gait than conventional gait training for patients with a stroke</p> <p>Treadmill-based gait training (with or without body weight support) can be used to enhance walking speed, and distance walked when overground training is not available or appropriate</p> <p>People who are able to walk independently after stroke should be offered treadmill training with or without body weight support or other walking-orientated interventions at a higher intensity than usual care and as an adjunct to other treatments</p> | Ne<br>Ca        | Level 1<br>Evidence Level:<br>Early-Level A;<br>Late-Level A).<br>Nil | Need of a stroke rehabilitation gymnasium with treadmill or without body support | Cost of establishing the gymnasium and treadmill; hospitals should try to invest in neurorehabilitation gymnasium | WSO Task Force on Stroke commissioners to develop, implement and monitor strategic action plan with all stakeholders to ensure availability of stroke rehabilitation services to all eligible stroke patients in their countries and regions |
| <p>UK</p> <p>Nil</p>                                                                                                                                                                                                                                                                                                                                                                                                                                                                                                                                                                                                                                                                                                                                                                                                                                                                                |                 |                                                                       |                                                                                  |                                                                                                                   |                                                                                                                                                                                                                                              |

|                                                                                                                                                                                                                                                                                                                                                                                                                       |          |                                                                                                          |                                                                                          |                                                            |                                                                                  |
|-----------------------------------------------------------------------------------------------------------------------------------------------------------------------------------------------------------------------------------------------------------------------------------------------------------------------------------------------------------------------------------------------------------------------|----------|----------------------------------------------------------------------------------------------------------|------------------------------------------------------------------------------------------|------------------------------------------------------------|----------------------------------------------------------------------------------|
| People who cannot walk independently after stroke should be considered for electromechanical-assisted gait training including body weight support                                                                                                                                                                                                                                                                     |          |                                                                                                          |                                                                                          |                                                            |                                                                                  |
| FES should be used to improve strength and function (gait) in selected patients, but the effects may not be sustained                                                                                                                                                                                                                                                                                                 | Ca<br>UK | (Evidence Level: Early-Level A; Late-Level A).                                                           | FES is a cheap stroke rehabilitation for stroke patients with foot dorsiflexion weakness | Functional electrical stimulators are not very expensive   | Availability should be ensured in neurorehabilitation services                   |
| People with stroke who have reduced ability to dorsiflex the foot ('foot-drop') should be offered functional electrical stimulation to improve their gait                                                                                                                                                                                                                                                             |          | Nil                                                                                                      |                                                                                          |                                                            |                                                                                  |
| People with stroke should only receive therapeutic electrical stimulation for treatment of the leg (other than for foot-drop) in the context of a clinical trial                                                                                                                                                                                                                                                      |          |                                                                                                          |                                                                                          |                                                            |                                                                                  |
| Robot-assisted gait training<br>It has been demonstrated that robot-assisted gait training for stroke patients who are unable to walk independently improves their comfortable walking speed, maximum walking speed, walking distance, heart rate, sitting and standing balance, walking ability and performance of basic activities of daily living, compared to conventional therapy (including overground walking) | Ne<br>Ca | Level 1<br><br>Evidence Level: Early-                                                                    | Robotic rehabilitation lab, trained therapists in robotic rehabilitation                 | Very expensive; tertiary centers should have this facility | Ensure availability; low-cost robotic rehabilitation could be developed in LMICs |
| Electromechanical (robotic) assisted gait training devices could be considered for patients who would not otherwise practice walking. They should not be used in place of conventional gait therapy                                                                                                                                                                                                                   |          |                                                                                                          |                                                                                          |                                                            |                                                                                  |
| It has been demonstrated that combining robot-assisted gait training with functional electrostimulation of the paretic leg improves the sitting and standing balance and walking ability of patients with a stroke, compared to conventional therapy (including overground walking). (Level 1)                                                                                                                        | Ne       | Level 1                                                                                                  | Same                                                                                     | Same                                                       | Same                                                                             |
| Use of other means to support restoration of the ability to walk. Intensive gait training to restore the ability to walk can also use a treadmill if available and appropriate, motor imagery as one component, or cyclic multichannel stimulation to generate movements similar to a walking pattern                                                                                                                 | WFNR     | LoE: 2b,1b<br>QoE: low<br>SoR: 0                                                                         |                                                                                          |                                                            |                                                                                  |
| Intensive gait training to improve gait in stroke survivors who walk independently or with little help: In patients who can walk independently with or without an aid or with little help an intensive and progressive gait training should be performed in the subacute stage after stroke, and can be performed (intermittently) in the chronic phase after stroke                                                  | WFNR     | Subacute:<br>LoE: 1b<br>QoE: moderate<br>SoR: B+<br>Chronic:<br>LoE: 1b<br>QoE: low (indirect)<br>SoR: 0 |                                                                                          |                                                            |                                                                                  |
| Use of other means to improve gait: Intensive gait training to improve gait can also include task-specific training combined with motor imagery, functional electrical stimulation, additional electroacupuncture, and/or usage of walking devices (e.g., crane, stick) (subacute phase)                                                                                                                              | WFNR     | LoE: 2b,1b<br>QoE: low<br>SoR: 0                                                                         |                                                                                          |                                                            |                                                                                  |



|                                                                                                                                                                                                                                                                                                                          |           |                                               |                                                                                     |                                                                                      |                                                                                                                                                                                                                                                             |
|--------------------------------------------------------------------------------------------------------------------------------------------------------------------------------------------------------------------------------------------------------------------------------------------------------------------------|-----------|-----------------------------------------------|-------------------------------------------------------------------------------------|--------------------------------------------------------------------------------------|-------------------------------------------------------------------------------------------------------------------------------------------------------------------------------------------------------------------------------------------------------------|
| Rhythmic auditory stimulation (RAS) could be considered for improving gait parameters in stroke patients, including gait velocity, cadence, stride length and gait symmetry                                                                                                                                              | Ca        | (Evidence Level A).                           | Gait lab, trained therapists                                                        | Expensive                                                                            | WSO implementation ecosystem on Stroke commissioners to develop, implement and monitor strategic action plan with all stakeholders to ensure availability of stroke rehabilitation services to all eligible stroke patients in their countries and regions. |
| Virtual reality training (such as non-immersive technologies) could be considered as an adjunct to conventional gait training                                                                                                                                                                                            |           |                                               | Virtual rehabilitation technology and trained therapists<br>Training for therapists | Same                                                                                 |                                                                                                                                                                                                                                                             |
| Mental practice could be considered as an adjunct to lower extremity motor retraining                                                                                                                                                                                                                                    |           |                                               |                                                                                     | Technology and training required                                                     |                                                                                                                                                                                                                                                             |
| Overground gait training<br>It has been demonstrated that overground gait training by stroke patients who are able to walk without physical support is more effective in increasing walking distance and reducing anxiety than walking on a treadmill. (Level 1)                                                         | Ne        | Level 1                                       | Therapists                                                                          | No technology is needed                                                              | Services should be made available                                                                                                                                                                                                                           |
| Incorporating cardiovascular exercise and strengthening interventions is reasonable to consider for recovery of gait capacity and gait-related mobility tasks                                                                                                                                                            | AHA<br>UK | Ila A<br>Nil                                  | Therapists, rehabilitation gymnasium                                                | Fitness of patients, comorbid medical conditions, training in technique is essential | Same                                                                                                                                                                                                                                                        |
| People with stroke, including those who use wheelchairs or have poor mobility, should be advised to participate in exercise with the aim of improving aerobic fitness and/or muscle strength unless there are contraindications                                                                                          |           |                                               |                                                                                     |                                                                                      |                                                                                                                                                                                                                                                             |
| Individually tailored aerobic training involving large muscle groups should be incorporated into a comprehensive stroke rehabilitation program to enhance cardiovascular endurance                                                                                                                                       | Ca        | (Evidence Level: Early-Level A; Late-Level A) | Same                                                                                | Same                                                                                 | Same                                                                                                                                                                                                                                                        |
| Heart rate and blood pressure should be monitored during training to ensure safety and attainment of target exercise intensity                                                                                                                                                                                           |           |                                               |                                                                                     |                                                                                      |                                                                                                                                                                                                                                                             |
| iii. To ensure long-term maintenance of health benefits, a planned transition from structured aerobic exercise to more self-directed physical activity at home or in the community should be implemented                                                                                                                 |           |                                               |                                                                                     |                                                                                      |                                                                                                                                                                                                                                                             |
| NMES is reasonable to consider as an alternative to an AFO for foot drop                                                                                                                                                                                                                                                 | AHA       | Ila A                                         | Therapists, availability of AFO                                                     | Simple and low cost                                                                  | Ensure availability                                                                                                                                                                                                                                         |
| It has been demonstrated that exercising, walking and other mobility-related functions and activities under the supervision of an informal caregiver improves the performance of basic activities of daily living for the patient with a stroke, and reduces the perceived burden of care for the informal caregiver     | Ne        | (Level 1)                                     | Therapists and training of caregivers                                               | Caregiver availability; motivation of caregivers                                     | Ensure inclusion in stroke rehabilitation protocols particularly in LMICs                                                                                                                                                                                   |
| <i>Training muscle strength in the paretic leg</i><br>It has been demonstrated that training the muscle strength of the paretic leg or both legs of stroke patients increases their muscle strength and resistance to passive movement, and improves the patient's gait in terms of cadence, symmetry, and stride length | Ne        | (Level 1)                                     | Therapists and training                                                             | Lack of therapists; involvement of caregivers                                        | Ensure the incorporation in neurorehabilitation protocols                                                                                                                                                                                                   |

|                                                                                                                                                                                                                                                                                                                                                                                                                                                                                                                                                                                                                                                                                                                                                                                                                                                                                                                                                                                                                                                                                                                                                                                                                                                                                                                                         |                 |                                   |                                       |                                                                                      |                                                                                                                                                                                                                                                            |
|-----------------------------------------------------------------------------------------------------------------------------------------------------------------------------------------------------------------------------------------------------------------------------------------------------------------------------------------------------------------------------------------------------------------------------------------------------------------------------------------------------------------------------------------------------------------------------------------------------------------------------------------------------------------------------------------------------------------------------------------------------------------------------------------------------------------------------------------------------------------------------------------------------------------------------------------------------------------------------------------------------------------------------------------------------------------------------------------------------------------------------------------------------------------------------------------------------------------------------------------------------------------------------------------------------------------------------------------|-----------------|-----------------------------------|---------------------------------------|--------------------------------------------------------------------------------------|------------------------------------------------------------------------------------------------------------------------------------------------------------------------------------------------------------------------------------------------------------|
| <p>Training aerobic endurance</p> <p>It has been demonstrated that training aerobic endurance increases the maximum oxygen consumption, respiratory functions in terms of FEV1 and expiratory flow per minute and workload of patients with a stroke. (Level 1)</p> <p><i>Aerobic endurance training combined with strength training</i></p> <p>It has been demonstrated that a combination of aerobic endurance training and strength training improves selective movements, muscle strength of the paretic leg, comfortable and maximum walking speed, walking distance, maximum oxygen consumption, heart rate in exertion, balance, level of physical activity in everyday life, and quality of life for patients with a stroke. (Level 1)</p>                                                                                                                                                                                                                                                                                                                                                                                                                                                                                                                                                                                      | Ne              | Level 1                           | Therapists, rehabilitation gymnasium  | Fitness of patients, comorbid medical conditions; training in technique is essential | Ensure availability                                                                                                                                                                                                                                        |
|                                                                                                                                                                                                                                                                                                                                                                                                                                                                                                                                                                                                                                                                                                                                                                                                                                                                                                                                                                                                                                                                                                                                                                                                                                                                                                                                         |                 |                                   | Same                                  | Same                                                                                 | Same                                                                                                                                                                                                                                                       |
| <p>Hydrotherapy</p> <p>It has been demonstrated that hydrotherapy increases the muscle strength of the paretic leg of patients with a stroke</p>                                                                                                                                                                                                                                                                                                                                                                                                                                                                                                                                                                                                                                                                                                                                                                                                                                                                                                                                                                                                                                                                                                                                                                                        | Ne              | Level 1)                          | Infrastructure and trained therapists | Expensive                                                                            | WSO implementation ecosystem on Stroke commissioners to develop, implement and monitor strategic action plan with all stakeholders to ensure availability of stroke rehabilitation services to all eligible stroke patients in their countries and regions |
| <p>Electrostimulation of the paretic leg using surface electrodes</p> <p>It has been demonstrated that neuromuscular stimulation (NMS) of the paretic leg improves selective movements, muscle strength, and resistance to passive movements for patients with a stroke.</p>                                                                                                                                                                                                                                                                                                                                                                                                                                                                                                                                                                                                                                                                                                                                                                                                                                                                                                                                                                                                                                                            | Ne              | Level 1)                          | Therapists and technology             | Easy to use                                                                          | Ensure availability, low cost                                                                                                                                                                                                                              |
| <p>It has been demonstrated that transcutaneous electrical nerve stimulation (TENS) of the paretic leg improves muscle strength and walking ability and related activities for patients with a stroke.</p>                                                                                                                                                                                                                                                                                                                                                                                                                                                                                                                                                                                                                                                                                                                                                                                                                                                                                                                                                                                                                                                                                                                              | Ne              | (Level 1)                         | Same                                  | Same                                                                                 | Same                                                                                                                                                                                                                                                       |
| <b>UPPER EXTREMITY ACTIVITY, INCLUDING ADLs, IADLs, TOUCH, AND PROPRIOCEPTION</b>                                                                                                                                                                                                                                                                                                                                                                                                                                                                                                                                                                                                                                                                                                                                                                                                                                                                                                                                                                                                                                                                                                                                                                                                                                                       |                 |                                   |                                       |                                                                                      |                                                                                                                                                                                                                                                            |
| <p>Functional tasks should be practiced: that is, task-specific training, in which the tasks are graded to challenge individual capabilities, practiced repeatedly, and progressed in difficulty on a frequent basis</p> <p>Patients should engage in training that is meaningful, engaging, repetitive, progressively adapted, task specific and goal-oriented in an effort to enhance motor control and restore sensorimotor function</p> <p>ii. Training should encourage the use of patients' affected limb during functional tasks and be designed to simulate partial or whole skills required in activities of daily living (e.g., folding, buttoning, pouring, and lifting)</p> <p>The team should promote the practice and transfer of skills gained in therapy into the patient's daily routine</p> <p>Therapy should include repetitive and intense use of novel tasks that challenge the patient to acquire the necessary skills needed to perform functional tasks and activities (Evidence Level A). People with stroke with potential or actual arm movement should be given every opportunity to practice functional activities. Practice should be characterized by movements that are of high intensity, repetitive and are task-specific. These activities may be bilateral or unilateral depending on the task.</p> | AHA<br>Ca<br>UK | I A<br>(Evidence Level A),<br>Nil | Therapists, training                  | Availability of therapists                                                           | Ensure incorporation in stroke rehabilitation protocols                                                                                                                                                                                                    |
|                                                                                                                                                                                                                                                                                                                                                                                                                                                                                                                                                                                                                                                                                                                                                                                                                                                                                                                                                                                                                                                                                                                                                                                                                                                                                                                                         |                 |                                   | Same for all                          |                                                                                      |                                                                                                                                                                                                                                                            |

|                                                                                                                                                                                                                                                                                                                                                                                                                                                                                                                                                                                                                                                                                                                                                                                                                                                                                                                                                                                                                                                                                                                                                                                                                                                                                                                                                                                                                                                                                                                                                                                                   |                             |                                                                              |                                                                              |                                                                                                                  |                                                                                                                                                                                                                                                            |
|---------------------------------------------------------------------------------------------------------------------------------------------------------------------------------------------------------------------------------------------------------------------------------------------------------------------------------------------------------------------------------------------------------------------------------------------------------------------------------------------------------------------------------------------------------------------------------------------------------------------------------------------------------------------------------------------------------------------------------------------------------------------------------------------------------------------------------------------------------------------------------------------------------------------------------------------------------------------------------------------------------------------------------------------------------------------------------------------------------------------------------------------------------------------------------------------------------------------------------------------------------------------------------------------------------------------------------------------------------------------------------------------------------------------------------------------------------------------------------------------------------------------------------------------------------------------------------------------------|-----------------------------|------------------------------------------------------------------------------|------------------------------------------------------------------------------|------------------------------------------------------------------------------------------------------------------|------------------------------------------------------------------------------------------------------------------------------------------------------------------------------------------------------------------------------------------------------------|
| All individuals with stroke should receive ADL training tailored to individual needs and eventual discharge setting                                                                                                                                                                                                                                                                                                                                                                                                                                                                                                                                                                                                                                                                                                                                                                                                                                                                                                                                                                                                                                                                                                                                                                                                                                                                                                                                                                                                                                                                               | AHA                         | I A                                                                          |                                                                              |                                                                                                                  |                                                                                                                                                                                                                                                            |
| Therapeutic positioning of the paretic arm<br>It has been demonstrated that therapeutic positioning of the paretic arm results in preservation of the passive exorotation of the shoulder of patients with a stroke                                                                                                                                                                                                                                                                                                                                                                                                                                                                                                                                                                                                                                                                                                                                                                                                                                                                                                                                                                                                                                                                                                                                                                                                                                                                                                                                                                               | Ne                          | Level 1                                                                      | Therapists and protocols                                                     | Availability of therapists                                                                                       | Ensure incorporation in stroke rehabilitation protocols                                                                                                                                                                                                    |
| People with functional loss in their arm after stroke should have the risk of shoulder pain reduced by:<br>– careful positioning of the arm, with the weight of the limb supported<br>– ensuring that family/carers handle the affected arm correctly, avoiding mechanical stress and excessive range of movement<br>– avoiding the use of overhead arm slings and pulleys<br>B People with arm weakness after stroke should be asked regularly about shoulder pain<br>C People who develop shoulder pain after stroke should:<br>– have the severity monitored and recorded regularly, using a validated pain assessment tool.<br>– have preventative measures put in place<br>– be offered regular simple analgesia<br>D People with shoulder pain after stroke should only be offered intra-articular steroid injections if they also have inflammatory arthritis                                                                                                                                                                                                                                                                                                                                                                                                                                                                                                                                                                                                                                                                                                                              | UK                          | Nil                                                                          | Therapists and caregivers<br><br>Therapists<br><br>Rehabilitation physicians | Availability of therapists and caregivers<br><br>Same<br><br>Training, other comorbid musculoskeletal conditions | Same<br><br>Same<br><br>Same                                                                                                                                                                                                                               |
| CIMT or its modified version is reasonable to consider for eligible stroke survivors<br><br>Traditional or modified constraint-induced movement therapy (CIMT) should be considered for a select group of patients who demonstrate at least 20 degrees of active wrist extension and 10 degrees of active finger extension, with minimal sensory or cognitive deficits<br><br>For stroke survivors with some active wrist and finger extension, intensive constraint-induced movement therapy (minimum 2 hours of active therapy per day for 2 weeks, plus restraint for at least 6 hours a day) should be provided to improve arm and hand use. Trunk restraint may also be incorporated into the active therapy sessions at any stage post-stroke.<br><br>Original Constraint-Induced Movement Therapy (CIMT)<br>It has been demonstrated that original CIMT improves the dexterity, perceived use of arm and hand, quality of arm and hand movements, and quality of life of patients with a stroke. (Level 1)<br>High-intensity modified Constraint-Induced Movement Therapy (mCIMT)<br><br>It has been demonstrated that high-intensity CIMT improves the dexterity, perceived use of arm and hand, and quality of arm and hand movements of patients with a stroke.<br>Low-intensity modified Constraint-Induced Movement Therapy (mCIMT)<br>It has been demonstrated that low-intensity mCIMT improves the selective movements, dexterity, perceived use of arm and hand, quality of arm and hand movements, and performance of basic activities of daily living of patients with a stroke | AHA<br>Ca<br>Au<br>Ne<br>UK | Ila A<br><br>Evidence Level A<br><br>Strong recommendation<br>Level 1<br>Nil | Therapists and training<br><br><br><br><br><br>Same for all                  | Not widely practiced; training is needed                                                                         | WSO implementation ecosystem on Stroke commissioners to develop, implement and monitor strategic action plan with all stakeholders to ensure availability of stroke rehabilitation services to all eligible stroke patients in their countries and regions |

|                                                                                                                                                                                                                                                                                                                                                                                                                            |                 |                                                             |                                 |                                           |                                                                                                                                                                                                                                                            |
|----------------------------------------------------------------------------------------------------------------------------------------------------------------------------------------------------------------------------------------------------------------------------------------------------------------------------------------------------------------------------------------------------------------------------|-----------------|-------------------------------------------------------------|---------------------------------|-------------------------------------------|------------------------------------------------------------------------------------------------------------------------------------------------------------------------------------------------------------------------------------------------------------|
| People with stroke who have 20 degrees of active wrist extension and 10 degrees of active finger extension in the affected hand should be considered for constraint-induced movement therapy. People with stroke who have been assessed as cognitively suitable to participate in mental practice of an activity should be trained and encouraged to use it to improve arm function, as an adjunct to conventional therapy |                 |                                                             |                                 |                                           |                                                                                                                                                                                                                                                            |
| Wearing a restraint of the non-affected arm outside therapeutic sessions is recommended when a “transfer package” is offered during therapy                                                                                                                                                                                                                                                                                | WFNR            | LoE: 1b<br>QoE: moderate<br>SoR: B+                         |                                 |                                           |                                                                                                                                                                                                                                                            |
| For patients with moderate arm paresis showing compensatory trunk displacement during reaching, using a trunk restraint while training reaching movements can be considered                                                                                                                                                                                                                                                | WFNR            | LoE: 1a<br>QoE: low<br>SoR: 0                               |                                 |                                           |                                                                                                                                                                                                                                                            |
| Patients showing learnt non-use while having only mild-to-moderate paresis with some preserved hand function and no major problems with pain or spasticity in their affected arm should be offered modified constraint-induced movement therapy, mCIMT or CIMT (the latter when beyond the acute phase) when the actual amount of use of the affected arm is the therapeutic target, i.e., to reverse learnt non-use       | WFNR            | LoE: 1a<br>QoE: high<br>SoR: B+                             |                                 |                                           |                                                                                                                                                                                                                                                            |
| People without movement in the affected arm after a stroke should be trained in how to care for their affected arm and monitored for any change                                                                                                                                                                                                                                                                            | UK              | Nil                                                         | Same                            | Same                                      | Same                                                                                                                                                                                                                                                       |
| Hand and wrist orthoses (splints) should not be used as part of routine practice as they have no effect on function, pain or range of movement                                                                                                                                                                                                                                                                             | Au              | Strong recommendation against                               | Training                        | Same                                      | Ensure incorporation in protocols                                                                                                                                                                                                                          |
| Robotic therapy is reasonable to consider, delivering more intensive practice for individuals with moderate to severe upper limb paresis                                                                                                                                                                                                                                                                                   | AHA<br>UK<br>Ne | Ila A<br><br>Nil<br>Level 1                                 | Robotic lab, trained therapists | Expensive; tertiary centres could develop | WSO implementation ecosystem on Stroke commissioners to develop, implement and monitor strategic action plan with all stakeholders to ensure availability of stroke rehabilitation services to all eligible stroke patients in their countries and regions |
| People with reduced arm function after a stroke should only be offered robot-assisted movement therapy or neuromuscular electrical stimulation as an adjunct to conventional therapy in the context of a clinical trial                                                                                                                                                                                                    |                 |                                                             |                                 |                                           |                                                                                                                                                                                                                                                            |
| Arm robot therapy is also an option in the chronic phase                                                                                                                                                                                                                                                                                                                                                                   | WFNR            | LoE: 1a<br>QoE: low<br>[uncertain effects]<br>SoR: 0        |                                 |                                           |                                                                                                                                                                                                                                                            |
| If available, arm robot therapy should be offered on a daily basis especially to increase dosage/intensity of repetitive selective movements in the acute/subacute phase when selective movement capacity recovery is therapeutic goal                                                                                                                                                                                     | WFNR            | LoE: 1a<br>QoE: high<br>SoR: B+ [unclear long-term effects] |                                 |                                           |                                                                                                                                                                                                                                                            |
| Mirror therapy should be considered as an adjunct to motor therapy for select patients. It may help to improve upper extremity motor function and ADLs                                                                                                                                                                                                                                                                     | Ca<br>WFNR      | Evidence Level: Early-Level A; Late-Level A).               | Training                        | Low cost                                  | Ensure availability                                                                                                                                                                                                                                        |
| Daily mirror therapy as additional training for several weeks, e.g., as supervised self-training, should be considered when motor improvement at impairment and/or activity level is intended                                                                                                                                                                                                                              | WFNR            | LoE: 1a<br>QoE: moderate<br>SoR: B+                         |                                 |                                           |                                                                                                                                                                                                                                                            |

|                                                                                                                                                                                                                                                                                                                                                                                                                                                                                                                                                                                                                                                                                                                                                                                                                                                                                                                                                                                                                                                                                                                                                                                                                                                                                                                                                                                                                                                                                                                                                                                                 |                 |                                                                 |                                                             |                             |                                                                                                                                                                                                                                                            |
|-------------------------------------------------------------------------------------------------------------------------------------------------------------------------------------------------------------------------------------------------------------------------------------------------------------------------------------------------------------------------------------------------------------------------------------------------------------------------------------------------------------------------------------------------------------------------------------------------------------------------------------------------------------------------------------------------------------------------------------------------------------------------------------------------------------------------------------------------------------------------------------------------------------------------------------------------------------------------------------------------------------------------------------------------------------------------------------------------------------------------------------------------------------------------------------------------------------------------------------------------------------------------------------------------------------------------------------------------------------------------------------------------------------------------------------------------------------------------------------------------------------------------------------------------------------------------------------------------|-----------------|-----------------------------------------------------------------|-------------------------------------------------------------|-----------------------------|------------------------------------------------------------------------------------------------------------------------------------------------------------------------------------------------------------------------------------------------------------|
| <p>It has been demonstrated that virtual reality training of the paretic arm and hand as an add-on to regular exercise therapy for patients with a stroke improves the performance of basic activities of daily living. Studied for ER and RC.</p> <p>Virtual reality, including both immersive technologies such as head mounted or robotic interfaces and non-immersive technologies such as gaming devices can be used as adjunct tools to other rehabilitation therapies as a means to provide additional opportunities for engagement, feedback, repetition, intensity and task-oriented training</p>                                                                                                                                                                                                                                                                                                                                                                                                                                                                                                                                                                                                                                                                                                                                                                                                                                                                                                                                                                                      | Ne<br>Ca        | (Level 1)<br><br>(Evidence Level: Early-Level A; Late-Level A). | Technology and training                                     | Expensive; tertiary centers | WSO implementation ecosystem on Stroke commissioners to develop, implement and monitor strategic action plan with all stakeholders to ensure availability of stroke rehabilitation services to all eligible stroke patients in their countries and regions |
| <p>NMES is reasonable to consider for individuals with minimal volitional movement within the first few months after stroke or for individuals with shoulder subluxation</p> <p>Functional Electrical Stimulation (FES) targeted at the wrist and forearm muscles should be considered to reduce motor impairment and improve function</p> <p>Electrostimulation of the paretic arm using surface electrodes NMS of the paretic wrist and finger extensors</p> <p>It has been demonstrated that neuromuscular electrostimulation (NMS) of the paretic wrist and finger extensors of patients with a stroke is not more effective in terms of selective movements, muscle strength, active range of motion for wrist and finger extension, and dexterity than other interventions. (Level 1)<br/>NMS of the paretic wrist and finger flexors and extensors</p> <p>It has been demonstrated that neuromuscular stimulation (NMS) of the paretic wrist and finger flexors and extensors of patients with a stroke improves selective movements and muscle strength. (Level 1)<br/>NMS of the paretic shoulder muscles<br/>It has been demonstrated that neuromuscular electrostimulation (NMS) of the paretic shoulder muscles of patients with a stroke reduces glenohumeral subluxation.</p> <p>EMG-NMS of the paretic wrist and finger extensors: It has been demonstrated that EMG-triggered neuromuscular electrostimulation (EMG-NMS) of the paretic wrist and finger extensors of patients with a stroke improves selective movements, active range of motion, and dexterity. (Level 1)</p> | AHA<br>Ca<br>Ne | Ila A<br>Evidence Level A<br>Level 1                            | Therapists, technology and availability<br><br>Same for all | Training                    | Ensure availability                                                                                                                                                                                                                                        |
| <p>Cyclic, cNMES of wrist and finger flexors and extensors, or when EMG-triggering is voluntarily possible, EMG-NMES of wrist and finger extensors, in selected cases as functional electrical stimulation, FES can be used to enhance selective motion capacity and arm activities</p> <p>cNMES of shoulder muscles can be applied to treat subluxation</p>                                                                                                                                                                                                                                                                                                                                                                                                                                                                                                                                                                                                                                                                                                                                                                                                                                                                                                                                                                                                                                                                                                                                                                                                                                    | WFNR            | LoE: 1a<br>QoE: low<br>SoR: 0                                   |                                                             |                             |                                                                                                                                                                                                                                                            |
|                                                                                                                                                                                                                                                                                                                                                                                                                                                                                                                                                                                                                                                                                                                                                                                                                                                                                                                                                                                                                                                                                                                                                                                                                                                                                                                                                                                                                                                                                                                                                                                                 | WFNR            | LoE: 1a<br>QoE: low<br>SoR: 0                                   |                                                             |                             |                                                                                                                                                                                                                                                            |
| <p>Mental practice is reasonable to consider as an adjunct to upper extremity rehabilitation services</p>                                                                                                                                                                                                                                                                                                                                                                                                                                                                                                                                                                                                                                                                                                                                                                                                                                                                                                                                                                                                                                                                                                                                                                                                                                                                                                                                                                                                                                                                                       | AHA             | Ila A                                                           | Therapists and training                                     | Training                    | Ensure availability                                                                                                                                                                                                                                        |
| <p>Mental practice is an alternative option after actual motor training sessions with the paretic arm</p>                                                                                                                                                                                                                                                                                                                                                                                                                                                                                                                                                                                                                                                                                                                                                                                                                                                                                                                                                                                                                                                                                                                                                                                                                                                                                                                                                                                                                                                                                       | WFNR            | LoE: 1a<br>QoE: moderate<br>SoR: 0                              |                                                             |                             |                                                                                                                                                                                                                                                            |

|                                                                                                                                                                                                                                                                |                 |                                          |                                             |                                                     |                                                          |
|----------------------------------------------------------------------------------------------------------------------------------------------------------------------------------------------------------------------------------------------------------------|-----------------|------------------------------------------|---------------------------------------------|-----------------------------------------------------|----------------------------------------------------------|
| Strengthening exercises are reasonable to consider as an adjunct to functional task practice                                                                                                                                                                   | AHA<br>Au<br>Ca | Ila B<br>Weak<br><br>(Evidence Level A). | Therapists and training<br><br>Same for all | Training                                            | Ensure implemented in protocols                          |
| For stroke survivors with reduced strength in their arms or legs, strength training should be provided                                                                                                                                                         |                 |                                          |                                             |                                                     |                                                          |
| Strength training should be considered for persons with mild to moderate upper extremity function in both subacute and chronic phases of recovery<br>Strength training does not aggravate tone or pain                                                         |                 |                                          |                                             |                                                     |                                                          |
| Strengthening exercises can be an element of individualized therapy                                                                                                                                                                                            | WFNR            | LoE: 1a<br>QoE: moderate<br>SoR: 0       |                                             |                                                     |                                                          |
| Virtual reality is reasonable to consider as a method for delivering upper extremity movement practice                                                                                                                                                         | AHA             | Ila B                                    | Technology                                  | Expensive                                           | Ensure availability                                      |
| Purpose-built virtual reality therapy systems (and gaming consoles) can be used to improve selective motion capacity                                                                                                                                           | WFNR            | LoE: 1a<br>QoE: low<br>SoR: 0            |                                             |                                                     |                                                          |
| Virtual reality therapy systems (arm weight support): Purpose-built virtual reality therapy systems with arm weight support can be used to improve selective motion capacity and arm activities with severe incomplete arm paresis                             | WFNR            | LoE: 1b<br>QoE: low<br>SoR: 0            |                                             |                                                     |                                                          |
| Strengthening exercises can be an element of individualized therapy                                                                                                                                                                                            | WFNR            | LoE: 1a<br>QoE: moderate<br>SoR: 0       |                                             |                                                     |                                                          |
| Bilateral training paradigms may be useful for upper limb therapy                                                                                                                                                                                              | AHA             | Ila B                                    | Therapists and training                     | Training                                            | Ensure including in protocols                            |
| It has been demonstrated that interventions to improve the somatosensory functions of the paretic arm and hand of patients with a stroke improve the somatosensory functions and reduce the resistance to passive movements                                    | Ne              | Level 1                                  | Same                                        | Same                                                | Same                                                     |
| Somatosensory (especially thermal) stimulation is an option as adjunct therapy                                                                                                                                                                                 | WFNR            | LoE: 1b<br>QoE: moderate<br>SoR: 0       |                                             |                                                     |                                                          |
| Acupuncture is not recommended for the improvement of ADLs and upper extremity activity                                                                                                                                                                        | AHA             | III A                                    | Create awareness                            | Very commonly used in Asia; needs well planned RCTs | Do not include in protocols till strong evidence emerges |
| Acupuncture for arm rehabilitation: In the subacute phase also acupuncture                                                                                                                                                                                     | WFNR            | LoE: 1b<br>QoE: low<br>SoR: 0            |                                             |                                                     |                                                          |
| Recommendations: Adaptive equipment, durable medical devices, orthotics, and wheelchairs<br>Ambulatory assistive devices (e.g., cane, walker) should be used to help with gait and balance impairments, as well as mobility efficiency and safety, when needed | AHA             | I B                                      | Therapists, companies and training          | Simple low cost                                     | Ensure availability                                      |
| AFOs should be used for ankle instability or dorsiflexor weakness                                                                                                                                                                                              | AHA             | I B                                      | Same for all                                |                                                     |                                                          |
| Wheelchairs should be used for non-ambulatory individuals or those with limited walking ability                                                                                                                                                                | AHA             | I C                                      | Same                                        | Same                                                | Same                                                     |

|                                                                                                                                                                                                                                                                                                         |                   |                                                                           |                         |          |                                   |
|---------------------------------------------------------------------------------------------------------------------------------------------------------------------------------------------------------------------------------------------------------------------------------------------------------|-------------------|---------------------------------------------------------------------------|-------------------------|----------|-----------------------------------|
| Adaptive and assistive devices should be used for safety and function if other methods of performing the task/activity are not available or cannot be learned or if the patient's safety is a concern                                                                                                   | AHA               | I C                                                                       | Same                    | Same     | Same                              |
| Later rehabilitation<br>Targeted training, such as balance training, gait training with different devices, and upper extremity training more than one year after stroke seems to have a positive effect                                                                                                 | ESAP              | Ila A                                                                     | Therapists and training | Training | Ensure including in protocol      |
| Intensive gait training to re-establish the ability to walk in stroke survivors who cannot walk without help:<br>In the subacute stage after stroke, intensive gait training should be performed in order to re-establish the ability to walk in stroke survivors who cannot walk without help          | WFNR              | LoE: 1b<br>QoE: low to moderate<br>SoR: B+                                |                         |          |                                   |
| Use of electromechanical gait-training re-establish the ability to walk in stroke survivors who cannot walk without help: If available and appropriate, intensive physiotherapy should be combined with the use of an end-effector-based device or an exoskeleton (for electromechanical gait training) | WFNR              | LoE: 1a<br>QoE: high<br>SoR: B+                                           |                         |          |                                   |
| <b>CHRONIC CARE MANAGEMENT – HOME AND COMMUNITY-BASED PARTICIPATION</b>                                                                                                                                                                                                                                 |                   |                                                                           |                         |          |                                   |
| After successful screening, an individually tailored exercise program is indicated to enhance cardiorespiratory fitness and to reduce the risk of stroke recurrence                                                                                                                                     | AHA<br>ESAP<br>Au | I<br>A (for improved fitness); B (for reduction of stroke risk)<br>Strong | Therapists and training | Training | Same                              |
| Strategies to address specific barriers to physical activity related to patients, health care providers, family, and/or the environment should be employed                                                                                                                                              | Ca                | (Evidence Level: Early-Level A; Late-Level A).                            | Same                    | Same     | Same                              |
| After completion of formal stroke rehabilitation, participation in a program of exercise or physical activity at home or in the community is recommended. (Access to green areas and walking space may facilitate physical activity)                                                                    | AHA<br>ESAP<br>Au | I A<br>Strong                                                             | Same                    | Same     | Same                              |
| Community-dwelling stroke survivors who have difficulties performing daily activities should be assessed by a trained clinician                                                                                                                                                                         |                   |                                                                           | Same                    | Same     | Same                              |
| Community-dwelling stroke survivors with confirmed difficulties in personal or extended ADL should have specific therapy from a trained clinician (e.g., task-specific practice and training in the use of appropriate aids) to address these issues                                                    |                   |                                                                           | Same                    | Same     | Same                              |
| <b>TREATMENTS/INTERVENTIONS FOR VISUAL IMPAIRMENTS</b>                                                                                                                                                                                                                                                  |                   |                                                                           |                         |          |                                   |
| For deficits in eye movements:<br>Eye exercises for treatment of convergence insufficiency are recommended                                                                                                                                                                                              | AHA               | I A                                                                       | Therapists and training | Training | Ensure incorporating in protocols |
| As the available observational studies consistently showed a significant treatment effect of binocular fusion treatment in about 90% of treated patients (with convergence/fusion deficits), these treatments can be used                                                                               | WFNR              | LoE: 2b<br>QoE: low<br>SoR: 0                                             |                         |          |                                   |
| Eye exercises for treatment of convergence insufficiency are recommended                                                                                                                                                                                                                                | AHA               | I A                                                                       | Same                    | Same     | Same                              |
| Multimodal audio-visual spatial exploration training appears to be more effective than visual spatial exploration training alone and is recommended to improve visual scanning                                                                                                                          | AHA               | I B                                                                       | Same                    | Same     | Same                              |

|                                                                                                                                                                                                                                                                                                                                                                                                       |                         |                                         |                           |                                         |                                   |
|-------------------------------------------------------------------------------------------------------------------------------------------------------------------------------------------------------------------------------------------------------------------------------------------------------------------------------------------------------------------------------------------------------|-------------------------|-----------------------------------------|---------------------------|-----------------------------------------|-----------------------------------|
| The use of behavioral optometry approaches involving eye exercises and the use of lenses and coloured filters to improve eye movement control, eye focusing, and eye coordination is not recommended                                                                                                                                                                                                  | AHA                     | III B                                   | Same                      | Same                                    | Same                              |
| <b>RECOMMENDATIONS; SOCIAL AND FAMILY CAREIVER SUPPORT</b>                                                                                                                                                                                                                                                                                                                                            |                         |                                         |                           |                                         |                                   |
| It may be useful for the family/caregiver to be an integral component of stroke rehabilitation                                                                                                                                                                                                                                                                                                        | AHA<br>ESAP             | IIb A                                   | Therapists and caregivers | Training and availability of caregivers | Ensure implementation             |
| It may be reasonable that family/caregiver support include some or all of the following on a regular basis:<br>Education<br>Training<br>Counseling<br>Development of a support structure<br>Financial assistance                                                                                                                                                                                      | AHA<br>ESAP<br>Au<br>Ca | IIb A<br><br>Strong (Evidence Level A). | Same<br><br>Same for all  | Same                                    | Same                              |
| Stroke survivors and their carers should be offered information, education, support and training throughout all phases of post-stroke recovery in order to enable safe discharge and successful reintegration into the community                                                                                                                                                                      |                         |                                         |                           |                                         |                                   |
| Patient, family and caregiver education is provided both formally and informally, with consideration given to individual and group settings as appropriate                                                                                                                                                                                                                                            |                         |                                         |                           |                                         |                                   |
| <b>RECOMMENDATIONS: REFERRAL TO COMMUNITY RESOURCES</b>                                                                                                                                                                                                                                                                                                                                               |                         |                                         |                           |                                         |                                   |
| It is recommended that acute care hospitals and rehabilitation facilities maintain up-to-date inventories of community resources                                                                                                                                                                                                                                                                      | AHA                     | I C                                     | Same for all              |                                         |                                   |
| Patient and family/caregiver preferences for resources should be considered                                                                                                                                                                                                                                                                                                                           | AHA                     | I C                                     | Same for all              | Same                                    | Same                              |
| It is recommended that information about local resources be provided to the patient and family                                                                                                                                                                                                                                                                                                        | AHA                     | I C                                     | Same for all              | Same                                    | Same                              |
| It is recommended that contact with community resources be offered through formal or informal referral                                                                                                                                                                                                                                                                                                | AHA                     | I C                                     | Same for all              | Same                                    | Same                              |
| Follow-up is recommended to ensure that the patient and family receive the necessary services                                                                                                                                                                                                                                                                                                         | AHA                     | I C                                     | Same for all              | Same                                    | Same                              |
| Patients with stroke receiving comprehensive ADL, IADL, and mobility assessments, including evaluation of the discharge living setting, should be considered candidates for community or home-based rehabilitation when feasible. Exclusions include individuals with stroke who require daily nursing services, regular medical interventions, specialized equipment, or interprofessional expertise | AHA                     | . I A                                   | Same for all              | Same                                    | Same                              |
| Comprehensive discharge care plans that address the specific needs of the stroke survivor should be developed in conjunction with the stroke survivor and carer prior to discharge                                                                                                                                                                                                                    | Au                      | Strong                                  | Same for all              | Same                                    | Same                              |
| People with stroke, including those living in a care home, should be offered a structured health and social care review at six months and 1 year after the stroke, and then annually                                                                                                                                                                                                                  | UK                      | Nil                                     | Therapists and training   | Training                                | Ensure incorporating in protocols |



|                                                                                                                                                                                                                                                                                                                                                                                                                                   |                   |                                                            |                                |                                               |                                                                                                                                                                     |
|-----------------------------------------------------------------------------------------------------------------------------------------------------------------------------------------------------------------------------------------------------------------------------------------------------------------------------------------------------------------------------------------------------------------------------------|-------------------|------------------------------------------------------------|--------------------------------|-----------------------------------------------|---------------------------------------------------------------------------------------------------------------------------------------------------------------------|
| The review should consider whether further interventions are needed, and the person should be referred for further specialist assessment if:<br>– new problems are present<br>– the person’s physical or psychological condition, or social environment has changed                                                                                                                                                               |                   |                                                            |                                |                                               |                                                                                                                                                                     |
| It is reasonable that caregivers, including family members, be involved in training and education related directly to home-based rehabilitation programs and be included as active partners in the planning and implementation or treatment activities under the supervision of professionals                                                                                                                                     | AHA               | Ila B                                                      | Therapists and caregivers      | Availability of caregivers                    | Same                                                                                                                                                                |
| <b>RECREATIONAL AND LEISURE ACTIVITY</b>                                                                                                                                                                                                                                                                                                                                                                                          |                   |                                                            |                                |                                               |                                                                                                                                                                     |
| It is reasonable to promote engagement in leisure and recreational pursuits, particularly through the provision of information on the importance of maintaining an active and healthy lifestyle                                                                                                                                                                                                                                   | AHA               | Ila B                                                      | Same                           | Same                                          | Same                                                                                                                                                                |
| It is reasonable to foster the development of self-management skills for problem solving for overcoming barriers to engagement in active activities                                                                                                                                                                                                                                                                               | AHA               | Ila B                                                      | Same                           | Same                                          | Same                                                                                                                                                                |
| It is reasonable to start education and self-management skill development about leisure/ recreation activities during and in conjunction with in-patient rehabilitation                                                                                                                                                                                                                                                           | AHA<br>Ne<br>UK   | Ila B<br><br>Level 1<br>Nil                                | Same                           | Same                                          | Same                                                                                                                                                                |
| It has been demonstrated that therapy to learn/re-learn leisure or social activities at home, such as gardening or painting, have a favourable effect on the participation in leisure time activities of patients with a stroke. (Level 1)<br>Studied for ER.                                                                                                                                                                     |                   |                                                            |                                |                                               |                                                                                                                                                                     |
| People with stroke should be asked about their pre-stroke work and leisure activities<br>People with stroke who wish to return to or take up a leisure activity should have their cognitive and practical skills assessed and receive support to pursue their activity                                                                                                                                                            |                   |                                                            | Same                           | Same                                          | Same                                                                                                                                                                |
| All patients and caregivers should receive information about the potential cognitive and emotional consequences, including fatigue, following stroke because it improves patients’ and caregivers’ knowledge and reduces the level of depression in patients                                                                                                                                                                      | WFRN              | LoE: 1a<br>QoE: low<br>SoR: B+<br>[clinical relevance]     |                                |                                               |                                                                                                                                                                     |
| Clinicians should be aware of the influence of post-stroke fatigue on daily life functioning and societal participation. Although evidence is limited, psychosocial treatment and physical activity seem promising for the management of post-stroke fatigue                                                                                                                                                                      | WFNR              | LoE: 5<br>QoE: very low<br>SoR: 0                          |                                |                                               |                                                                                                                                                                     |
| Cognitive problems may arise at a later stage when the patient is discharged home and environmental demands are increasing. Resuming to prior activities, especially returning to work, may lead to problems which were not detected earlier. Patients and caregivers should be referred to relevant follow-up care and neuropsychological rehabilitation within their stroke service                                             | WFNR              | LoE: 5<br>QoE: very low<br>SoR: B+<br>[clinical relevance] |                                |                                               |                                                                                                                                                                     |
| New problems may occur in the chronic phase after stroke when environmental demands are changing or increasing. Chronicity does not necessarily imply stability. Neuropsychological rehabilitation can be offered by experienced clinical or neuropsychologists working within a multidisciplinary team in which occupational therapists will address the link to the patient’s daily life functioning and societal participation | WFRN              | LoE: 5<br>QoE: very low<br>SoR: 0                          |                                |                                               |                                                                                                                                                                     |
| <b>RECOMMENDATIONS: RETURN TO WORK</b><br>Vocationally targeted therapy or vocational rehabilitation is reasonable for individuals with stroke considering a return to work                                                                                                                                                                                                                                                       | AHA<br>ESAP<br>UK | Ila C<br><br>Nil                                           | Therapists, assessment centers | Lack of assessment services in many countries | WSO implementation ecosystem on Stroke commissioners to develop, implement and monitor strategic action plan with all stakeholders to ensure availability of stroke |
| People who wish to return to work after stroke (paid or unpaid employment) should:                                                                                                                                                                                                                                                                                                                                                |                   |                                                            | Same for all                   |                                               |                                                                                                                                                                     |

|                                                                                                                                                                                                                                                                                                                                                                                                                                                                                                                                                                                                                                                                                                                                                                                                                          |      |                                                                                                                                                                 |
|--------------------------------------------------------------------------------------------------------------------------------------------------------------------------------------------------------------------------------------------------------------------------------------------------------------------------------------------------------------------------------------------------------------------------------------------------------------------------------------------------------------------------------------------------------------------------------------------------------------------------------------------------------------------------------------------------------------------------------------------------------------------------------------------------------------------------|------|-----------------------------------------------------------------------------------------------------------------------------------------------------------------|
| <ul style="list-style-type: none"> <li>- have their work requirements established with their employer (provided the person with stroke agrees)</li> <li>- be assessed cognitively, linguistically and practically to establish their potential for return</li> <li>- be advised on the most suitable time and way to return to work, if return is feasible</li> <li>- be referred through the job center to a specialist in employment for people with disability if extra support or advice is needed</li> <li>- be referred to a specialist vocational rehabilitation team if the job center specialist is unable to provide the necessary rehabilitation</li> </ul>                                                                                                                                                   |      | rehabilitation services to all eligible stroke patients in their countries and regions                                                                          |
| <p>Vocational rehabilitation programs for people after stroke should include:</p> <ul style="list-style-type: none"> <li>- assessment of potential problems in returning to work, based on the work role and demands from both the employee's and employer's perspectives</li> <li>- an action plan for how problems may be overcome</li> <li>- interventions specifically designed for the individual which may include vocational counselling and coaching, emotional support, adaptation of the working environment</li> <li>- strategies to compensate for functional limitations in mobility and arm function, and fatigue management</li> <li>- clear communication between primary and secondary care teams and including the person with stroke, to aid benefit claims or to support a return to work</li> </ul> |      |                                                                                                                                                                 |
| <p>Psychoeducation and strategy training can easily be combined in low-intensity group-based programs aimed at individualized patient-centred goals. Regional low-frequency or national high-intensity (holistic) outpatient neuro-psychological rehabilitation programs may be indicated because of the complex interplay between cognitive, emotional and social consequences. There is no time limit to these programs which means that patients may also be supported many years after the injury</p>                                                                                                                                                                                                                                                                                                                | WFNR | <p>LoE: 5<br/>QoE: very low<br/>SoR: B+<br/>[clinical relevance]</p>                                                                                            |
| <p>Psychoeducation should always be offered to both prevent and reduce anxiety, stress and depressive complaints in both patients and caregivers</p>                                                                                                                                                                                                                                                                                                                                                                                                                                                                                                                                                                                                                                                                     | WFNR | <p>LoE: 1a<br/>QoE: moderate<br/>SoR: B+</p>                                                                                                                    |
| <p><b>RECOMMENDATIONS: RETURN TO DRIVING</b><br/>Individuals who appear to be ready to return to driving, as demonstrated by successful performance on fitness-to-drive tests, should have an on-the-road test administered by an authorized person</p>                                                                                                                                                                                                                                                                                                                                                                                                                                                                                                                                                                  | AHA  | <p>Ila B</p> <p>Infrastructure and personnel of road transport department</p> <p>Non availability of fitness to drive assessment</p> <p>Ensure availability</p> |
| <p>If the outcome of the screening shows concerns, the patient should be referred for a comprehensive fitness-to-drive assessment with a driving rehabilitation specialist, if available</p>                                                                                                                                                                                                                                                                                                                                                                                                                                                                                                                                                                                                                             | WFNR | <p>LoE: 1a<br/>QoE: moderate<br/>SoR: B+</p>                                                                                                                    |
| <p>Determine that the patient meets the jurisdiction's minimum requirement for driving (if any)</p>                                                                                                                                                                                                                                                                                                                                                                                                                                                                                                                                                                                                                                                                                                                      | WFNR | <p>LoE: NA<br/>QoE: NA<br/>SoR: A+</p>                                                                                                                          |
| <p>If there are specific requirements for driving after stroke in the jurisdiction, refer to it and ensure the patient meets the requirements</p>                                                                                                                                                                                                                                                                                                                                                                                                                                                                                                                                                                                                                                                                        | WFNR | <p>LoE: NA<br/>QoE: NA<br/>SoR: A+</p>                                                                                                                          |
| <p>If the patient is found unfit to drive, alternative transportation methods should be discussed with the patient</p>                                                                                                                                                                                                                                                                                                                                                                                                                                                                                                                                                                                                                                                                                                   | WFNR | <p>LoE: 5<br/>QoE: very low<br/>SoR: A+<br/>[clinical relevance]</p>                                                                                            |

|                                                                                                                                                                                                                                                                                                                                                                                                               |      |                                                                                        |                         |                                                            |                                                   |
|---------------------------------------------------------------------------------------------------------------------------------------------------------------------------------------------------------------------------------------------------------------------------------------------------------------------------------------------------------------------------------------------------------------|------|----------------------------------------------------------------------------------------|-------------------------|------------------------------------------------------------|---------------------------------------------------|
| If the patient does not meet one or more of the jurisdiction's prescribed requirements, the patient should be advised to allow more time for better recovery and/or discuss alternative transportation methods                                                                                                                                                                                                | WFNR | LoE: 5<br>QoE: very low<br>SoR: A+<br>[clinical relevance]                             |                         |                                                            |                                                   |
| Red flags ought first to be assessed, i.e., risk of recurring stroke, risk of epileptic seizures or severe neglect etc                                                                                                                                                                                                                                                                                        | WFNR | LoE: 5<br>QoE: very low<br>SoR: A+<br>[clinical relevance]                             |                         |                                                            |                                                   |
| Adequate screening tools should be used to determine patients whose functional deficit(s) is(are) reason(s) for concerns                                                                                                                                                                                                                                                                                      | WFNR | LoE: 1a<br>QoE: moderate<br>SoR: B+                                                    |                         |                                                            |                                                   |
| If driving-specific rehabilitation is warranted, contextual training in a driving simulator is preferred for maximum generalization of benefit, although non-contextual training has also shown moderate benefit                                                                                                                                                                                              | WFNR | LoE: 1a<br>QoE: low<br>(imprecision, inconsistency)<br>SoR: B+<br>[clinical relevance] |                         |                                                            |                                                   |
| Retraining can also be offered in the form of lessons with a driving instructor in a dual controlled vehicle                                                                                                                                                                                                                                                                                                  | WFNR | LoE: 4<br>QoE: very low<br>SoR: 0                                                      |                         |                                                            |                                                   |
| The off-road part of the fitness-to-drive assessment ought to include tests of monocular and binocular visual acuities and visual field; cognitive testing to ascertain general cognitive status also needs to be done; finally, basic motor testing of strength, coordination, and range of motion should be assessed. However, there is no consensus on the selection of tests to include in the assessment | WFNR | LoE: 5<br>QoE: very low<br>SoR: A+<br>[clinical relevance]                             |                         |                                                            |                                                   |
| If the outcome of the off-road assessment shows some, but no serious concern, the patient should be referred for a practical on-road test (if available) to confirm the suitability to resume driving with or without restrictions                                                                                                                                                                            | WFNR | LoE: 5<br>QoE: very low<br>SoR: B+<br>[clinical relevance]                             |                         |                                                            |                                                   |
| It is reasonable that individuals be assessed for cognitive, perception, physical, and motor abilities to ascertain readiness to return to driving according to safety and local laws<br>Do not assess driving eligibility with cognitive tests if the person's language impairment would invalidate the results<br>Do refer for an on-road assessment if there is uncertainty about eligibility for driving  | AHA  | Ila B                                                                                  | Same                    | Same                                                       | Same                                              |
|                                                                                                                                                                                                                                                                                                                                                                                                               | UK   | Nil                                                                                    | Same                    | Same                                                       | Same                                              |
| It is reasonable that individuals who do not pass an on-the-road driving test be referred to a driver rehabilitation program for training                                                                                                                                                                                                                                                                     | AHA  | I C<br>Ila B                                                                           | Same                    | Same                                                       | Same                                              |
| Sex<br>People with stroke should be asked, soon after discharge and at their 6-month and annual reviews, whether they have any concerns about sex. Partners should also have an opportunity to raise any problems.<br>B People with sexual dysfunction after stroke who want further help should be:<br>– assessed for treatable causes including a medication review                                         | UK   | Nil                                                                                    | Therapists and training | Neglected aspect of stroke rehabilitation; raise awareness | Ensure implementation in rehabilitation protocols |

- 
- reassured that sexual activity is not contraindicated after stroke and is extremely unlikely to precipitate a further stroke
  - assessed for erectile dysfunction and the use of a phosphodiesterase type 5 inhibitor (e.g., sildenafil)
  - advised against the use of a phosphodiesterase type 5 inhibitor for 3 months after stroke and/or until blood pressure is controlled
  - referred to a professional with expertise in psychosexual problems if sexual dysfunction persists
- 

AHA: American Hypertension Association. ESAP: European Stroke Action Plan. Ca: Canada. Au: Australia. UK: United Kingdom. Ne: The Netherlands. American Heart Association (e.g., Class I Level A),<sup>4</sup> Netherlands KNGF Stroke Guideline,<sup>5</sup> Canada Stroke Best Practice recommendation,<sup>7</sup> Clinical pathways in stroke rehabilitation: evidence-based clinical practice recommendations<sup>55</sup> European Stroke Organisation,<sup>8</sup> Australian Stroke Foundation<sup>9</sup>, United Kingdom NICE guideline for stroke,<sup>10</sup> and World Stroke Organization.<sup>151</sup>

**Supplementary Table 21. Summary of key pragmatic solutions based on national and international stroke guidelines to improve stroke rehabilitation services worldwide**

| <b>KEY RECOMMENDATIONS</b><br>(Criteria: Class I and III and IIa A or B, IIbA recommendations only from best Guidelines reviewed based on COUNCIL Criteria) | <b>Source</b> | <b>LOE</b> | <b>Resources required for implementation</b>                                                                                                                                                                           | <b>Barriers/Facilitators for implementation in LMICs</b>                                                                                                                                                                                                                                                                                                                                                                                                                              | <b>Pragmatic Solutions/Recommendation for contextualization and implementation in LMICs through implementation ecosystem</b>                                                                                                                           |
|-------------------------------------------------------------------------------------------------------------------------------------------------------------|---------------|------------|------------------------------------------------------------------------------------------------------------------------------------------------------------------------------------------------------------------------|---------------------------------------------------------------------------------------------------------------------------------------------------------------------------------------------------------------------------------------------------------------------------------------------------------------------------------------------------------------------------------------------------------------------------------------------------------------------------------------|--------------------------------------------------------------------------------------------------------------------------------------------------------------------------------------------------------------------------------------------------------|
| <b>ORGANIZATION OF REHABILITATION SERVICE</b>                                                                                                               |               |            |                                                                                                                                                                                                                        |                                                                                                                                                                                                                                                                                                                                                                                                                                                                                       |                                                                                                                                                                                                                                                        |
| It is recommended that early rehabilitation for hospitalized stroke patients be provided in environments with organized, interprofessional stroke care.     | AHA<br>ESAP   | I A        | Multidisciplinary rehabilitation facilities with rehabilitation doctor/physician/neurologist, physiotherapist, occupational therapist, speech and language and dysphagia therapist, clinical psychologist, nurse; etc. | Major barriers to be surmounted include lack of awareness and low demand, absence of/or inadequate number of rehabilitation professionals (need to establish training institutions/program to produce adequate number of professionals); need to adapt evidence-base practice recommendations to regional capacities (need to establish regional protocols / clinical pathways); need to finance rehabilitation services to make them accessible and available to all stroke patients | Implementation ecosystem on Stroke commissioners to develop, implement and monitor strategic action plan with all stakeholders to ensure availability of stroke rehabilitation services to all eligible stroke patients in their countries and regions |

| <b>SKIN</b>                                                                                                                                                                                                                                                                                                                                          |           |            |                                                                            |                                                                                |                                                                                                            |
|------------------------------------------------------------------------------------------------------------------------------------------------------------------------------------------------------------------------------------------------------------------------------------------------------------------------------------------------------|-----------|------------|----------------------------------------------------------------------------|--------------------------------------------------------------------------------|------------------------------------------------------------------------------------------------------------|
| In ischaemic stroke, prophylactic-dose subcutaneous heparin (UFH or LMWH) should be used for the duration of the acute and rehabilitation hospital stay or until the stroke survivor regains mobility                                                                                                                                                | AHA       | I A        | Subcutaneous heparin                                                       | Availability of subcutaneous heparin                                           | Provision and administration of subcutaneous Heparin for DVT prophylaxis in patients with ischaemic stroke |
| <b>PAIN</b>                                                                                                                                                                                                                                                                                                                                          |           |            |                                                                            |                                                                                |                                                                                                            |
| Patient and family education (i.e., range of motion, positioning) is recommended for shoulder pain and shoulder care after stroke, particularly before discharge or transitions in care                                                                                                                                                              | AHA       | I C        | Education                                                                  | Education                                                                      | Training of care providers to educate patients/family members                                              |
| <b>FALLS</b>                                                                                                                                                                                                                                                                                                                                         |           |            |                                                                            |                                                                                |                                                                                                            |
| It is recommended that individuals with stroke be provided a formal fall prevention program during hospitalization                                                                                                                                                                                                                                   | AHA<br>UK | I A<br>Nil | In hospital rehabilitation programs with balance and falls risk assessment | Limited number of organized programs with assessment of balance and risk falls | Support for workshops, production of free online training materials                                        |
| People with stroke should be offered falls risk assessment and management as part of their stroke rehabilitation, including training for them and their family/carers in how to get up after a fall                                                                                                                                                  |           |            |                                                                            |                                                                                |                                                                                                            |
| People with stroke should be offered an assessment of fear of falling as part of their falls risk assessment                                                                                                                                                                                                                                         |           |            |                                                                            |                                                                                |                                                                                                            |
| People at high risk of falls after stroke should be offered a standardized assessment of fragility fracture risk as part of their stroke rehabilitation                                                                                                                                                                                              |           |            |                                                                            |                                                                                |                                                                                                            |
| People with stroke with symptoms of vitamin D deficiency, or those who are considered to be at high risk (e.g., housebound) should be offered calcium and vitamin D supplements                                                                                                                                                                      |           |            |                                                                            |                                                                                |                                                                                                            |
| People at high risk of falls after stroke should be advised to participate in physical activity/exercise which incorporates balance and co-ordination at least twice per week                                                                                                                                                                        |           |            |                                                                            |                                                                                |                                                                                                            |
| <b>DEPRESSION</b>                                                                                                                                                                                                                                                                                                                                    |           |            |                                                                            |                                                                                |                                                                                                            |
| In the first months post-stroke, antidepressant pharmacotherapy is only recommended if the process of rehabilitation is hindered by emotional problems. Increasing motivation for and participation in rehabilitation is the target for treatment. Selective serotonin reuptake inhibitors, SSRIs should be considered when depressive complaints or | WFNR      |            |                                                                            |                                                                                | LoE: 1a<br>QoE: moderate<br>SoR: B+                                                                        |

emotionalism are long lasting and become chronic while adverse effects should be monitored continuously

**CONSCIOUSNESS**

|                                                                                                                                                                                                                                                                                                                                                                                                                                         |      |                                                                              |
|-----------------------------------------------------------------------------------------------------------------------------------------------------------------------------------------------------------------------------------------------------------------------------------------------------------------------------------------------------------------------------------------------------------------------------------------|------|------------------------------------------------------------------------------|
| <p>Amantadine for a course of amantadine treatment over a couple of weeks can be used in the beginning of the rehabilitation treatment of stroke survivors with DoC (VS-MCS) to promote recovery in the disability domain</p> <p>The evidence is too limited to guide clinical decision-making with respect to long-term use and discontinuation of amantadine, or the prescription of other drugs to treat DoC in stroke survivors</p> | WFNR | <p>LoE: 1b<br/>QoE:<br/>moderate<br/>SoR: 0<br/>indirectness of evidence</p> |
|-----------------------------------------------------------------------------------------------------------------------------------------------------------------------------------------------------------------------------------------------------------------------------------------------------------------------------------------------------------------------------------------------------------------------------------------|------|------------------------------------------------------------------------------|

**COGNITION**

|                                                                                                                                                                                                                                                                                           |                           |                                   |                                                                                                                                        |                                                                              |                                                                                                               |
|-------------------------------------------------------------------------------------------------------------------------------------------------------------------------------------------------------------------------------------------------------------------------------------------|---------------------------|-----------------------------------|----------------------------------------------------------------------------------------------------------------------------------------|------------------------------------------------------------------------------|---------------------------------------------------------------------------------------------------------------|
| <p>Screening for cognitive deficits is recommended for all stroke patients before discharge home</p>                                                                                                                                                                                      | <p>AHA<br/>AHA<br/>UK</p> | <p>I B<br/>IIa C<br/><br/>Nil</p> | <p>Multidisciplinary approach should include trained clinical psychologist experienced in cognitive assessment (neuropsychologist)</p> | <p>Limited number of trained neuropsychologists /occupational therapists</p> | <p>Need to finance multidisciplinary rehabilitation including neuropsychologists/ occupational therapists</p> |
| <p>When screening reveals cognitive deficits, a more detailed neuropsychological evaluation to identify areas of cognitive strength and weakness may be beneficial</p>                                                                                                                    |                           |                                   |                                                                                                                                        |                                                                              |                                                                                                               |
| <p>Services for people with stroke should have a comprehensive approach to delivering psychological care that includes specialist clinical neuropsychology/clinical psychology input within the multi-disciplinary team</p>                                                               |                           |                                   |                                                                                                                                        |                                                                              |                                                                                                               |
| <p>People with stroke should be considered to have at least some cognitive impairment in the early phase. Routine screening should be undertaken to identify the person’s level of functioning, using standardized measures</p>                                                           |                           |                                   |                                                                                                                                        |                                                                              |                                                                                                               |
| <p>People with communication impairment after stroke should receive a cognitive assessment using valid assessments in conjunction with a speech and language therapist. Specialist advice should be sought if there is uncertainty about the interpretation of cognitive test results</p> |                           |                                   |                                                                                                                                        |                                                                              |                                                                                                               |
| <p>Any person with stroke who is not progressing as expected in rehabilitation should receive a detailed assessment to determine whether cognitive impairments are responsible, with the results explained to the person, their family, and the multidisciplinary team</p>                |                           |                                   |                                                                                                                                        |                                                                              |                                                                                                               |
| <p>People with acute cognitive problems after stroke whose care is being transferred from hospital should receive an assessment for any safety risks from persisting cognitive</p>                                                                                                        |                           |                                   |                                                                                                                                        |                                                                              |                                                                                                               |

impairments. Risks should be communicated to their primary care team together with any mental capacity issues that might affect their decision-making

People with stroke returning to cognitively demanding activities such as driving, or work should have their cognition fully assessed

**DYSPHAGIA SCREENING, MANAGEMENT, AND NUTRITIONAL SUPPORT**

|                                                                                                                                                                                         |           |               |                                                                                   |                                                           |                                                                                     |
|-----------------------------------------------------------------------------------------------------------------------------------------------------------------------------------------|-----------|---------------|-----------------------------------------------------------------------------------|-----------------------------------------------------------|-------------------------------------------------------------------------------------|
| Early dysphagia screening is recommended for acute stroke patients to identify dysphagia or aspiration, which can lead to pneumonia, malnutrition, dehydration, and other complications | AHA<br>Au | I B<br>Strong | Multidisciplinary approach should include trained speech and swallowing therapist | Limited number of trained speech and swallowing therapist | Financing training program, workshops, and online materials for healthcare provider |
|-----------------------------------------------------------------------------------------------------------------------------------------------------------------------------------------|-----------|---------------|-----------------------------------------------------------------------------------|-----------------------------------------------------------|-------------------------------------------------------------------------------------|

|                                                                                                                         |     |     |                                                                      |                                                                                                                            |                                                                                    |
|-------------------------------------------------------------------------------------------------------------------------|-----|-----|----------------------------------------------------------------------|----------------------------------------------------------------------------------------------------------------------------|------------------------------------------------------------------------------------|
| External feedings (tube feedings) should be initiated within 7 days after stroke for patients who cannot safely swallow | AHA | I A | Implementation of a dysphagia screening program for all stroke cases | Major barriers to be surmounted include lack of awareness and low demand, absence of/or inadequate number of professionals | Financing training program, workshops and online materials for healthcare provider |
|-------------------------------------------------------------------------------------------------------------------------|-----|-----|----------------------------------------------------------------------|----------------------------------------------------------------------------------------------------------------------------|------------------------------------------------------------------------------------|

**APHASIA**

|                                                                                                     |                         |                      |                                                                                  |                                                          |                                                                                    |
|-----------------------------------------------------------------------------------------------------|-------------------------|----------------------|----------------------------------------------------------------------------------|----------------------------------------------------------|------------------------------------------------------------------------------------|
| Recommendations: Aphasia<br>Speech and language therapy is recommended for individuals with aphasia | AHA<br>Au<br>UK<br>WFNR | I A<br>Strong<br>Nil | Multidisciplinary approach should include trained speech and language therapists | Limited number of trained speech and language therapists | Financing training program, workshops and online materials for healthcare provider |
|-----------------------------------------------------------------------------------------------------|-------------------------|----------------------|----------------------------------------------------------------------------------|----------------------------------------------------------|------------------------------------------------------------------------------------|

People with communication problems after stroke should be assessed by a speech and language therapist to diagnose the problem and to explain the nature and implications to the person, their family/careers and the multidisciplinary team. Reassessment in the first four months should only be undertaken if the results will affect decision-making or are required for mental capacity assessment

**SPASTICITY**

|                                                                                                                                                                                                                   |     |     |                                   |                                                       |                                             |
|-------------------------------------------------------------------------------------------------------------------------------------------------------------------------------------------------------------------|-----|-----|-----------------------------------|-------------------------------------------------------|---------------------------------------------|
| Targeted injection of botulinum toxin into localized upper limb muscles is recommended to reduce spasticity, to improve passive or active range of motion, and to improve dressing, hygiene, and limb positioning | AHA | I A | Multidisciplinary approach should | Limited number of trained neurologists //physical and | Financing training programs, workshops, and |
|-------------------------------------------------------------------------------------------------------------------------------------------------------------------------------------------------------------------|-----|-----|-----------------------------------|-------------------------------------------------------|---------------------------------------------|



|  |  |  |                                                  |                                 |                                                                                |
|--|--|--|--------------------------------------------------|---------------------------------|--------------------------------------------------------------------------------|
|  |  |  | include trained neurologists for Botox injection | rehabilitation medicine doctors | online materials for neurologists/physical and rehabilitation medicine doctors |
|--|--|--|--------------------------------------------------|---------------------------------|--------------------------------------------------------------------------------|

**BALANCE**

|                                                                                                                                                                                                             |                 |                                            |                                                    |                                       |                                                                          |
|-------------------------------------------------------------------------------------------------------------------------------------------------------------------------------------------------------------|-----------------|--------------------------------------------|----------------------------------------------------|---------------------------------------|--------------------------------------------------------------------------|
| Individuals with stroke who have poor balance, low balance confidence, and fear of falls or are at risk for falls should be provided with a balance training program                                        | AHA<br>Ca<br>Ne | I A<br>Evidence<br>Level<br>A<br>(Level 1) | Physiotherapists are required for balance training | Need large number of physiotherapists | Recommend training of more physiotherapists for stroke patients globally |
| For patients with balance disorders post stroke, balance training should be offered                                                                                                                         |                 |                                            |                                                    |                                       |                                                                          |
| It has been demonstrated that exercising postural control with visual feedback while standing on a force platform improves the postural sway in stance of patients with a stroke                            |                 |                                            |                                                    |                                       |                                                                          |
| Studied for early and chronic rehabilitation                                                                                                                                                                |                 |                                            |                                                    |                                       |                                                                          |
| It has been demonstrated that exercising balance during various activities results in improved sitting and standing balance and improved performance of basic activities of daily living by stroke patients |                 |                                            |                                                    |                                       |                                                                          |
| Studied for early, late, and chronic rehabilitation                                                                                                                                                         |                 |                                            |                                                    |                                       |                                                                          |

**MOBILITY**

|                                                                                                                                                                                                                                                |                   |                          |                                                              |                                                                                    |                                                                                                                        |
|------------------------------------------------------------------------------------------------------------------------------------------------------------------------------------------------------------------------------------------------|-------------------|--------------------------|--------------------------------------------------------------|------------------------------------------------------------------------------------|------------------------------------------------------------------------------------------------------------------------|
| Intensive, repetitive, mobility- task training is recommended for all individuals with gait limitations after stroke                                                                                                                           | AHA<br>Ca<br>ESAP | I A<br>Evidence<br>Level | Physiotherapists are required for mobility and gait training | Need large number of physiotherapists/physical and rehabilitation medicine doctors | Recommend training of more physiotherapists /physical and rehabilitation medicine doctors for stroke patients globally |
| Task and goal-oriented training that is repetitive and progressively adapted should be used to improve performance of selected lower-extremity tasks such as walking distance and speed and sit to stand                                       | Ne<br>UK          | A<br>Level 1<br>Nil      |                                                              |                                                                                    |                                                                                                                        |
| It has been demonstrated that training specific skills, such as exercising balance while standing and reaching to grasp objects, has a favorable effect on the specific skill being trained by stroke patients in all phases of rehabilitation |                   |                          |                                                              |                                                                                    |                                                                                                                        |
| People with loss of movement and/or ataxia after stroke sufficient to limit their activities should be assessed by a physiotherapist with experience in neurological rehabilitation                                                            |                   |                          |                                                              |                                                                                    |                                                                                                                        |
| People with loss of movement and/or ataxia after stroke should be taught task-specific, repetitive, intensive exercises or activities that will increase strength                                                                              |                   |                          |                                                              |                                                                                    |                                                                                                                        |

---

People with impaired sitting balance after stroke should receive trunk training exercises

People with significant impairment of their balance and walking ability after stroke should receive progressive balance training, functional task-specific training, lower limb strengthening exercises and be considered for an ankle-foot orthosis

People with moderate to severe limitation of their walking ability after stroke should be assessed for a walking aid to improve their stability

People with stroke who are able to walk with or without assistance should undergo task specific walking training with a cardiorespiratory and/or muscle strength focus at sufficient intensity to improve endurance and walking speed

People with limited ability to walk after stroke should be assessed by a physiotherapist with experience in neurological rehabilitation to guide management

People with limited mobility after stroke should be assessed, provided with and trained in how to use appropriate mobility aids including a wheelchair to enable safe independent mobility

---

**UPPER EXTREMITY ACTIVITY, INCLUDING ADLS, IADLS, TOUCH, AND PROPRIOCEPTION**

|                                                                                                                                                                                                                   |                 |                                         |                         |                            |                                                                  |
|-------------------------------------------------------------------------------------------------------------------------------------------------------------------------------------------------------------------|-----------------|-----------------------------------------|-------------------------|----------------------------|------------------------------------------------------------------|
| Functional tasks should be practiced: that is, task-specific training, in which the tasks are graded to challenge individual capabilities, practiced repeatedly, and progressed in difficulty on a frequent basis | AHA<br>Ca<br>UK | I A<br>(Evidence<br>Level<br>A),<br>Nil | Therapists,<br>training | Availability of therapists | Ensure incorporation in<br>stroke<br>rehabilitation<br>protocols |
|-------------------------------------------------------------------------------------------------------------------------------------------------------------------------------------------------------------------|-----------------|-----------------------------------------|-------------------------|----------------------------|------------------------------------------------------------------|

Patients should engage in training that is meaningful, engaging, repetitive, progressively adapted, task specific and goal-oriented in an effort to enhance motor control and restore sensorimotor function

ii. Training should encourage the use of patients' affected limb during functional tasks and be designed to simulate partial or whole skills required in activities of daily living (e.g., folding, buttoning, pouring, and lifting)

The team should promote the practice and transfer of skills gained in therapy into the patient's daily routine

Therapy should include repetitive and intense use of novel tasks that challenge the patient to acquire the necessary skills needed to perform functional tasks and activities (Evidence Level A)

People with stroke with potential or actual arm movement should be given every opportunity to practice functional activities. Practice should be characterized by

---

|                                                                                                                                                                                                                                                      |                   |               |                           |                                         |                                   |
|------------------------------------------------------------------------------------------------------------------------------------------------------------------------------------------------------------------------------------------------------|-------------------|---------------|---------------------------|-----------------------------------------|-----------------------------------|
| movements that are of high intensity, repetitive and are task-specific. These activities may be bilateral or unilateral depending on the task                                                                                                        |                   |               |                           |                                         |                                   |
| <b>CHRONIC CARE MANAGEMENT: HOME- AND COMMUNITY-BASED PARTICIPATION</b>                                                                                                                                                                              |                   |               |                           |                                         |                                   |
| After completion of formal stroke rehabilitation, participation in a program of exercise or physical activity at home or in the community is recommended. (Access to green areas and walking space may facilitate physical activity)                 | AHA<br>ESAP<br>Au | I A<br>Strong | Therapists and training   | Training                                | Same                              |
| Community-dwelling stroke survivors who have difficulties performing daily activities should be assessed by a trained clinician                                                                                                                      |                   |               |                           |                                         |                                   |
| Community-dwelling stroke survivors with confirmed difficulties in personal or extended ADL should have specific therapy from a trained clinician (e.g., task-specific practice and training in the use of appropriate aids) to address these issues |                   |               |                           |                                         |                                   |
| <b>TREATMENTS/INTERVENTIONS FOR VISUAL IMPAIRMENTS</b>                                                                                                                                                                                               |                   |               |                           |                                         |                                   |
| For deficits in eye movements:<br>Eye exercises for treatment of convergence insufficiency are recommended                                                                                                                                           | AHA               | I A           | Therapists and training   | Training                                | Ensure incorporating in protocols |
| <b>SOCIAL AND FAMILY CAREGIVER SUPPORT</b>                                                                                                                                                                                                           |                   |               |                           |                                         |                                   |
| It may be useful for the family/caregiver to be an integral component of stroke rehabilitation                                                                                                                                                       | AHA<br>ESAP       | IIb A         | Therapists and caregivers | Training and availability of caregivers | Ensure implementation             |
| <b>REFERRAL TO COMMUNITY RESOURCES</b>                                                                                                                                                                                                               |                   |               |                           |                                         |                                   |
| It is recommended that acute care hospitals and rehabilitation facilities maintain up-to-date inventories of community resources                                                                                                                     | AHA               | I C           | Therapists and caregivers | Training and availability of caregivers | Ensure implementation             |
| <b>RECREATIONAL AND LEISURE ACTIVITY</b>                                                                                                                                                                                                             |                   |               |                           |                                         |                                   |
| It is reasonable to promote engagement in leisure and recreational pursuits, particularly through the provision of information on the importance of maintaining an active and healthy lifestyle                                                      | AHA               | IIa B         | Therapists and caregivers | Training and availability of caregivers | Ensure implementation             |

American Heart Association (e.g., Class I Level A)<sup>82</sup>, Netherlands KNGF Stroke Guideline<sup>83</sup>, Canada Stroke Best Practice recommendation<sup>84</sup>, WFNR Clinical pathways in stroke rehabilitation: evidence-based clinical practice recommendations<sup>85</sup>, European Stroke Organisation, Australian Stroke Foundation<sup>2</sup>, United Kingdom NICE guideline for stroke<sup>86</sup>, and World Stroke Organization. AHA: American Hypertension Association. ESAP: European Stroke Action Plan. Ca: Canada. Au: Australia. UK: United Kingdom. Ne: The Netherlands.

## REFERENCES

1. Owolabi MO, Thrift AG, Mahal A, Ishida M, Martins S, Johnson WD, et al. Primary stroke prevention worldwide: translating evidence into action. *The Lancet Public Health*. 2022;7(1):e74–85.
2. Owolabi MO, Thrift A, Martins S, Yaria JO, Feigin VL. The state of stroke services across the globe: report of World Stroke Organization - World Health Organization surveys (accepted for publication). *IJS*. 2021;
3. Yaria J, Gil A, Manganjuola A, Oguntoye R, Miranda J, Lazo-Porras M, et al. Quality of stroke guidelines in low- and middle-income countries: a systematic review. *Bull World Health Org*. 2021 Sep 1;99(09):640-652E.
4. Winstein CJ, Stein J, Arena R, Bates B, Cherney LR, Cramer SC, et al. Guidelines for Adult Stroke Rehabilitation and Recovery: A Guideline for Healthcare Professionals From the American Heart Association/American Stroke Association. *Stroke*. 2016 Jun;47(6):e98–169.
5. Veerbeek J, van Wegen E, Peppen RPS, Hendriks E, Rietberg MB, Wees PhJ, et al. Clinical Practice Guideline for Physical Therapy after Stroke (Dutch: KNGF-richtlijn Beroerte). 2014 May 1;
6. Nederlandse Vereniging voor Neurologie. Richtlijn herseninfarct en hersenbloeding [Internet]. 2017. Available from: [kennisnetwerkcvn.nl/wp-content/uploads/2018/08/Richtlijn-herseninfarct-en-hersenbloeding-2017.pdf](https://kennisnetwerkcvn.nl/wp-content/uploads/2018/08/Richtlijn-herseninfarct-en-hersenbloeding-2017.pdf)
7. Hebert D, Lindsay MP, McIntyre A, Kirton A, Rumney PG, Bagg S, et al. Canadian stroke best practice recommendations: Stroke rehabilitation practice guidelines, update 2015. *Int J Stroke*. 2016;11(4):459–84.
8. Norrving B, Barrick J, Davalos A, Dichgans M, Cordonnier C, Guekht A, et al. Action Plan for Stroke in Europe 2018–2030: *European Stroke Journal* [Internet]. 2018 Oct 29 [cited 2019 Dec 20]; Available from: <https://journals.sagepub.com/doi/10.1177/2396987318808719>
9. Stroke Foundation. Clinical Guidelines for Stroke Management. Melbourne Australia [Internet]. 2019. Available from: <https://informme.org.au/Guidelines/Clinical-Guidelines-for-Stroke-Management-2017>
10. National Institute of Health and Care Excellence. Overview | Stroke and transient ischaemic attack in over 16s: diagnosis and initial management | Guidance | NICE [Internet]. 2019 [cited 2020 Jan 12]. Available from: <https://www.nice.org.uk/guidance/ng128>
11. Owolabi M, Miranda JJ, Yaria J, Ovbiagele B. Controlling cardiovascular diseases in low and middle income countries by placing proof in pragmatism. *BMJ Glob Health*. 2016 Oct 5;1(3).
12. Owolabi M, Olowoyo P, Miranda JJ, Akinyemi R, Feng W, Yaria J, et al. Gaps in Hypertension Guidelines in Low- and Middle-Income Versus High-Income Countries: A Systematic Review. *Hypertension*. 2016;68(6):1328–37.

13. Owolabi MO, Yaria JO, Daivadanam M, Makanjuola AI, Parker G, Oldenburg B, et al. Gaps in Guidelines for the Management of Diabetes in Low- and Middle-Income Versus High-Income Countries-A Systematic Review. *Diabetes Care*. 2018;41(5):1097–105.
14. Feigin VL, Stark BA, Johnson CO, Roth GA, Bisignano C, Abady GG, et al. Global, regional, and national burden of stroke and its risk factors, 1990–2019: a systematic analysis for the Global Burden of Disease Study 2019. *The Lancet Neurology*. 2021 Oct;20(10):795–820.
15. Vos T, Lim SS, Abbafati C, Abbas KM, Abbasi M, Abbasifard M, et al. Global burden of 369 diseases and injuries in 204 countries and territories, 1990–2019: a systematic analysis for the Global Burden of Disease Study 2019. *The Lancet*. 2020 Oct 17;396(10258):1204–22.
16. GBD 2016 Mortality Collaborators. Global, regional, and national under-5 mortality, adult mortality, age-specific mortality, and life expectancy, 1970-2016: a systematic analysis for the Global Burden of Disease Study 2016. *Lancet*. 2017 Sep 16;390(10100):1084–150.
17. Foreman KJ, Marquez N, Dolgert A, Fukutaki K, Fullman N, McGaughey M, et al. Forecasting life expectancy, years of life lost, and all-cause and cause-specific mortality for 250 causes of death: reference and alternative scenarios for 2016–40 for 195 countries and territories. *The Lancet*. 2018 Nov 10;392(10159):2052–90.
18. Vollset SE, Goren E, Yuan CW, Cao J, Smith AE, Hsiao T, et al. Fertility, mortality, migration, and population scenarios for 195 countries and territories from 2017 to 2100: a forecasting analysis for the Global Burden of Disease Study. *The Lancet*. 2020 Oct 17;396(10258):1285–306.
19. Wang H, Abbas KM, Abbasifard M, Abbasi-Kangevari M, Abbastabar H, Abd-Allah F, et al. Global age-sex-specific fertility, mortality, healthy life expectancy (HALE), and population estimates in 204 countries and territories, 1950–2019: a comprehensive demographic analysis for the Global Burden of Disease Study 2019. *The Lancet*. 2020 Oct 17;396(10258):1160–203.
20. Yin RK. *Case study research: Design and methods*. Vol. 5. sage; 2009.
21. John L, William A, Dawar D, Khatter H, Singh P, Andrias A, et al. Implementation of a Physician-Based Stroke Unit in a Remote Hospital of North-East India-Tezpur Model. *J Neurosci Rural Pract*. 2021 Apr;12(2):356–61.
22. Sharma S, Padma MV, Bhardwaj A, Sharma A, Sawal N, Thakur S. Telestroke in resource-poor developing country model. *Neurol India*. 2016 Oct;64(5):934–40.
23. Singh S, Kate M, Samuel C, Kamra D, Kaliyaperumal A, Nandi J, et al. Rural Stroke Surveillance and Establishment of Acute Stroke Care Pathway Using Frontline Health Workers in Rural Northwest India: The Ludhiana Experience. *Neuroepidemiology*. 2021;55(4):297–305.
24. Pandian JD, Kalkonde Y, Sebastian IA, Felix C, Urimubenshi G, Bosch J. Stroke systems of care in low-income and middle-income countries: challenges and opportunities. *Lancet*. 2020 Oct 31;396(10260):1443–51.

25. Wang Y, Liao X, Zhao X, Wang DZ, Wang C, Nguyen-Huynh MN, et al. Using Recombinant Tissue Plasminogen Activator to Treat Acute Ischaemic Stroke in China: Analysis of the Results From the Chinese National Stroke Registry (CNSR). *Stroke*. 2011 Jun;42(6):1658–64.
26. Wang HY, Gu HQ, Zhou Q, Jiang YY, Yang X, Wang CJ, et al. Thrombolysis, time-to-treatment and in-hospital outcomes among young adults with ischaemic stroke in China: findings from a nationwide registry study in China. *BMJ Open*. 2022 Jun;12(6):e055055.
27. Huang Y, Wang JG, Wei JW, Headley AP, Wong LKS, Heeley EL, et al. Age and Gender Variations in the Management of Ischaemic Stroke in China. *International Journal of Stroke*. 2010 Oct;5(5):351–9.
28. Ouriques Martins SC, Sacks C, Hacke W, Brainin M, de Assis Figueiredo F, Marques Pontes-Neto O, et al. Priorities to reduce the burden of stroke in Latin American countries. *Lancet Neurol*. 2019 Jul;18(7):674–83.
29. Martins SCO, Pontes-Neto OM, Alves CV, de Freitas GR, Filho JO, Tosta ED, et al. Past, present, and future of stroke in middle-income countries: the Brazilian experience. *Int J Stroke*. 2013 Oct;8 Suppl A100:106–11.
30. Martins SO, Mont’Alverne F, Rebello LC, Abud DG, Silva GS, Lima FO, et al. Thrombectomy for Stroke in the Public Health Care System of Brazil. *New England Journal of Medicine*. 2020 Jun 11;382(24):2316–26.
31. de Oliveira GMM, Brant LCC, Polanczyk CA, Malta DC, Biolo A, Nascimento BR, et al. Estatística Cardiovascular – Brasil 2021. *Arq Bras Cardiol*. 2022 Jan 1;118(1):115–373.
32. Aguilera I, Infante A, Ormeño H, Urriola C. Improving health system efficiency: Chile: Implementation of the Universal Access with Explicit Guarantees (AUGE) reform [Internet]. World Health Organization; 2015 [cited 2022 Oct 8]. Report No.: WHO/HIS/HGF/CaseStudy/15.3. Available from: <https://apps.who.int/iris/handle/10665/187657>
33. Lavados PM, Díaz V, Jadue L, Olavarría VV, Cárcamo DA, Delgado I. Socioeconomic and cardiovascular variables explaining regional variations in stroke mortality in Chile: an ecological study. *Neuroepidemiology*. 2011;37(1):45–51.
34. Hoffmeister L, Lavados PM, Comas M, Vidal C, Cabello R, Castells X. Performance measures for in-hospital care of acute ischemic stroke in public hospitals in Chile. *BMC Neurol*. 2013 Mar 6;13:23.
35. Hoffmeister L, Lavados PM, Mar J, Comas M, Arrospide A, Castells X. Minimum intravenous thrombolysis utilization rates in acute ischemic stroke to achieve population effects on disability: A discrete-event simulation model. *J Neurol Sci*. 2016 Jun 15;365:59–64.
36. Lavados PM, Hoffmeister L, Moraga AM, Vejar A, Vidal C, Gajardo C, et al. Incidence, risk factors, prognosis, and health-related quality of life after stroke in a low-resource community

- in Chile (ÑANDU): a prospective population-based study. *The Lancet Global Health*. 2021 Mar 1;9(3):e340–51.
37. Martins SCO, Lavados P, Secchi TL, Brainin M, Ameriso S, Gongora-Rivera F, et al. Fighting Against Stroke in Latin America: A Joint Effort of Medical Professional Societies and Governments. *Front Neurol*. 2021;12:743732.
  38. Aref H, Zakaria M, Shokri H, Roushdy T, Basiouny AE, Nahas NE. Changing the Landscape of Stroke in Egypt. *CEE*. 2021;11(3):155–9.
  39. Fenta EH, Sisay BG, Gebreyesus SH, Endris BS. Trends and causes of adult mortality from 2007 to 2017 using verbal autopsy method, Addis Ababa, Ethiopia. *BMJ Open*. 2021 Nov 16;11(11):e047095.
  40. Kwon HR, Silva EA. Mapping the Landscape of Behavioral Theories: Systematic Literature Review. *Journal of Planning Literature*. 2020 May 1;35(2):161–79.
  41. Michie S, van Stralen MM, West R. The behaviour change wheel: A new method for characterising and designing behaviour change interventions. *Implement Sci*. 2011 Apr 23;6:42.
  42. National Institute for Health and Clinical Excellence. Behaviour change at population, community and individual levels. NICE; 2007.
  43. Bernhardt J, Gandhi D, Urimubenshi G, Eng J. Stroke rehabilitation in low-income and middle-income countries: a call to action. *The Lancet*. 2020 Nov 2;396:1452–62.
  44. Tawa N, Rhoda A, Brink Y, Urimubenshi G, Giljam-Enright M, Charumbira MY, et al. Stroke rehabilitation services in Africa – Challenges and opportunities: A scoping review of the literature. In: Louw Q, editor. Collaborative capacity development to complement stroke rehabilitation in Africa [Internet]. Cape Town (ZA): AOSIS; 2020 [cited 2022 Jun 8]. (Human Functioning, Technology and Health). Available from: <http://www.ncbi.nlm.nih.gov/books/NBK574231/>
  45. Bright T, Wallace S, Kuper H. A Systematic Review of Access to Rehabilitation for People with Disabilities in Low- and Middle-Income Countries. *Int J Environ Res Public Health* [Internet]. 2018 Oct [cited 2020 Sep 27];15(10). Available from: <https://www.ncbi.nlm.nih.gov/pmc/articles/PMC6210163/>
  46. Ekechukwu END, Olowoyo P, Nwankwo KO, Olaleye OA, Ogbodo VE, Hamzat TK, et al. Pragmatic Solutions for Stroke Recovery and Improved Quality of Life in Low- and Middle-Income Countries—A Systematic Review. *Front Neurol*. 2020 Jun 25;11:337.
  47. Odongo CO, Talbert-Slagle K. Training the next generation of Africa’s doctors: why medical schools should embrace the team-based learning pedagogy. *BMC Medical Education*. 2019 Nov 4;19(1):403.

48. Tumlinson K, Jaff D, Stilwell B, Onyango DO, Leonard KL. Reforming medical education admission and training in low- and middle-income countries: who gets admitted and why it matters. *Human Resources for Health*. 2019 Dec 2;17(1):91.
49. Cronk R, Bartram J. Environmental conditions in health care facilities in low- and middle-income countries: Coverage and inequalities. *International Journal of Hygiene and Environmental Health*. 2018 Apr 1;221(3):409–22.
50. AL-SHAMSI M. Addressing the physicians' shortage in developing countries by accelerating and reforming the medical education: Is it possible? *J Adv Med Educ Prof*. 2017 Oct;5(4):210–9.
51. National health mission M of health and family welfare. 13th common review mission report [Internet]. 2019. Available from: [https://nhsrcindia.org/sites/default/files/2021-04/13th\\_common\\_review\\_mission-Report\\_2019\\_Revise.pdf](https://nhsrcindia.org/sites/default/files/2021-04/13th_common_review_mission-Report_2019_Revise.pdf)
52. National health mission M of health and family welfare. National Programme for prevention & Control of Cancer, Diabetes, Cardiovascular Diseases & stroke (NPCDCS) :: National Health Mission [Internet]. [cited 2022 Sep 7]. Available from: <http://nhm.gov.in/index1.php?lang=1&level=2&sublinkid=1048&lid=604>
53. Owolabi MO, Platz T, Good D, Dobkin BH, Ekechukwu END, Li L. Editorial: Translating Innovations in Stroke Rehabilitation to Improve Recovery and Quality of Life Across the Globe. *Front Neurol*. 2020 Dec 14;11:630830.
54. Fanelli S, Salvatore FP, De Pascale G, Faccilongo N. Insights for the future of health system partnerships in low- and middle-income countries: a systematic literature review. *BMC Health Services Research*. 2020 Jun 22;20(1):571.
55. Platz T. Clinical Pathways in Stroke Rehabilitation Evidence-based Clinical Practice Recommendations: Evidence-based Clinical Practice Recommendations. 2021.
56. Leonardi M, Fheodoroff K. Goal Setting with ICF (International Classification of Functioning, Disability and Health) and Multidisciplinary Team Approach in Stroke Rehabilitation. In: Platz T, editor. *Clinical Pathways in Stroke Rehabilitation* [Internet]. Cham: Springer International Publishing; 2021 [cited 2022 Oct 4]. p. 35–56. Available from: [http://link.springer.com/10.1007/978-3-030-58505-1\\_3](http://link.springer.com/10.1007/978-3-030-58505-1_3)
57. Langhorne P, Ramachandra S, Stroke Unit Trialists' Collaboration. Organised inpatient (stroke unit) care for stroke: network meta-analysis. *Cochrane Database Syst Rev*. 2020 Apr 23;4:CD000197.
58. Platz T. Evidence-Based Guidelines and Clinical Pathways in Stroke Rehabilitation—An International Perspective. *Front Neurol* [Internet]. 2019 Mar 8 [cited 2020 Feb 13];10. Available from: <https://www.ncbi.nlm.nih.gov/pmc/articles/PMC6423914/>



59. Mehrholz J, Pohl M, Platz T, Kugler J, Elsner B. Electromechanical and robot-assisted arm training for improving activities of daily living, arm function, and arm muscle strength after stroke. *Cochrane Database Syst Rev*. 2015 Nov 7;(11):CD006876.
60. Mehrholz J, Thomas S, Kugler J, Pohl M, Elsner B. Electromechanical-assisted training for walking after stroke. *Cochrane Database Syst Rev*. 2020 Oct 22;10:CD006185.
61. Mehrholz J, Thomas S, Elsner B. Treadmill training and body weight support for walking after stroke. *Cochrane Database Syst Rev*. 2017 Aug 17;8:CD002840.
62. Dromerick AW, Geed S, Barth J, Brady K, Giannetti ML, Mitchell A, et al. Critical Period After Stroke Study (CPASS): A phase II clinical trial testing an optimal time for motor recovery after stroke in humans. *Proc Natl Acad Sci U S A*. 2021 Sep 28;118(39):e2026676118.
63. Burnes B. Complexity theories and organizational change. *International Journal of Management Reviews*. 2005;7(2):73–90.
64. Tuffin R. Implications of complexity theory for clinical practice and healthcare organization. *BJA Educ*. 2016 Oct 1;16(10):349–52.
65. Thompson DS, Fazio X, Kustra E, Patrick L, Stanley D. Scoping review of complexity theory in health services research. *BMC Health Serv Res* [Internet]. 2016 Mar 12 [cited 2018 Aug 31];16. Available from: <https://www.ncbi.nlm.nih.gov/pmc/articles/PMC4788824/>
66. Baatiema L, Sanuade O, Kuumuori Ganle J, Sumah A, Baatiema L, Sumankuuro J. An ecological approach to understanding stroke experience and access to rehabilitation services in Ghana: A cross-sectional study. *Health Soc Care Community*. 2021 Sep;29(5):e67–78.
67. Verberne DPJ, van Mastrigt GAPG, Ponds RWHM, van Heugten CM, Kroese MEAL. Economic evaluation of nurse-led stroke aftercare addressing long-term psychosocial outcome: a comparison to care-as-usual. *BMJ Open*. 2021 Feb 25;11(2):e039201.
68. English C, Ceravolo MG, Dorsch S, Drummond A, Gandhi DB, Halliday Green J, et al. Telehealth for rehabilitation and recovery after stroke: State of the evidence and future directions. *International Journal of Stroke*. 2022 Jun 1;17(5):487–93.
69. Eng JJ, Bird ML, Godecke E, Hoffmann TC, Laurin C, Olaoye OA, et al. Moving stroke rehabilitation research evidence into clinical practice: Consensus-based core recommendations from the Stroke Recovery and Rehabilitation Roundtable. *International Journal of Stroke*. 2019 Oct;14(8):766–73.
70. Gururaj S, Bird ML, Borschmann K, Eng JJ, Watkins CL, Walker MF, et al. Evidence-based stroke rehabilitation: do priorities for practice change and feasibility of implementation vary across high income, upper and lower-middle income countries? *Disabil Rehabil*. 2021 Apr 13;1–8.
71. He M, Wang J, Dong Q, Ji N, Meng P, Liu N, et al. Community-based stroke system of care improves patient outcomes in Chinese rural areas. *J Epidemiol Community Health*. 2018 Jul 1;72(7):630–5.

72. Owolabi MO, Suwanwela NC, Yaria J. Barriers to implementation of evidence into clinical practice in low-resource settings. *Nat Rev Neurol*. 2022 Aug;18(8):451–2.
73. Niama Natta DD, Lejeune T, Detrembleur C, Yarou B, Sogbossi ES, Alagnidé E, et al. Effectiveness of a self-rehabilitation program to improve upper-extremity function after stroke in developing countries: A randomized controlled trial. *Ann Phys Rehabil Med*. 2021 Jan;64(1):101413.
74. Zhou B, Zhang J, Zhao Y, Li X, Anderson CS, Xie B, et al. Caregiver-Delivered Stroke Rehabilitation in Rural China. *Stroke*. 2019 Jul;50(7):1825–30.
75. Lindley RI, Anderson CS, Billot L, Forster A, Hackett ML, Harvey LA, et al. Family-led rehabilitation after stroke in India (ATTEND): a randomised controlled trial. *The Lancet*. 2017 Aug;390(10094):588–99.
76. Liu H, Lindley R, Alim M, Felix C, Gandhi DB, Verma SJ, et al. Family-led rehabilitation in India (ATTEND)—Findings from the process evaluation of a randomized controlled trial. *International Journal of Stroke*. 2019 Jan;14(1):53–60.
77. Kwakkel G, Wegen EEH van. Family-delivered rehabilitation services at home: is the glass empty? *The Lancet*. 2017 Aug 5;390(10094):538–9.
78. Olaleye OA, Hamzat TK, Owolabi MO. Development and evaluation of the Primary Healthcare-based Physiotherapy Intervention and its effects on selected indices of stroke recovery. *International Journal of Therapy and Rehabilitation*. 2013 Sep;20(9):443–9.
79. Olaleye OA, Hamzat TK, Owolabi MO. Stroke rehabilitation: should physiotherapy intervention be provided at a primary health care centre or the patients' place of domicile? *Disabil Rehabil*. 2014;36(1):49–54.
80. Vloothuis JD, Mulder M, Veerbeek JM, Konijnenbelt M, Visser-Meily JM, Ket JC, et al. Caregiver-mediated exercises for improving outcomes after stroke. Cochrane Stroke Group, editor. *Cochrane Database of Systematic Reviews* [Internet]. 2016 Dec 21 [cited 2020 Oct 4]; Available from: <http://doi.wiley.com/10.1002/14651858.CD011058.pub2>
81. Kuo LM, Huang HL, Huang HL, Liang J, Chiu YC, Chen ST, et al. A home-based training program improves Taiwanese family caregivers' quality of life and decreases their risk for depression: a randomized controlled trial. *Int J Geriatr Psychiatry*. 2013 May;28(5):504–13.
82. Cramer SC, Dodakian L, Le V, See J, Augsburger R, McKenzie A, et al. Efficacy of Home-Based Telerehabilitation vs In-Clinic Therapy for Adults After Stroke: A Randomized Clinical Trial. *JAMA Neurol*. 2019 Jun 24;
83. Hempler I, Woitha K, Thielhorn U, Farin E. Post-stroke care after medical rehabilitation in Germany: a systematic literature review of the current provision of stroke patients. *BMC Health Serv Res*. 2018 Jun 19;18(1):468.

84. Rodgers H, Price C. Stroke unit care, inpatient rehabilitation and early supported discharge. *Clin Med (Lond)*. 2017 Apr;17(2):173–7.
85. Hug A, Spingler T, Hensel C, Fichtner S, Daniel T, Heutehaus L, et al. Goal attainment in mobility after acute rehabilitation of mobility-restricting paralysis syndromes with regard to the ambulatory therapeutic level of participation NeuroMoves. *BMC Neurology*. 2021 Apr 7;21(1):149.
86. World Health Organization. The Roadmap for Health Measurement and Accountability [Internet]. 2015. Available from: [https://www.who.int/hrh/documents/roadmap4health\\_measurent\\_account/en/](https://www.who.int/hrh/documents/roadmap4health_measurent_account/en/)

## REFERENCES

1. Owolabi MO, Thrift AG, Mahal A, Ishida M, Martins S, Johnson WD, Pandian J, Abd-Allah F, Yaria J, Phan HT, et al. Primary stroke prevention worldwide: translating evidence into action. *The Lancet Public Health*. 2022;7:e74-e85. doi: 10.1016/S2468-2667(21)00230-9
2. Owolabi MO, Thrift AG, Martins S, Johnson W, Pandian J, Abd-Allah F, Varghese C, Mahal A, Yaria J, Roth GA, et al. The state of stroke services across the globe: report of World Stroke Organization - World Health Organization surveys. *International Journal of Stroke*. 2021;16(8):889-901.
3. Yaria J, Gil A, Akintomiwa M, Oguntoye R, Miranda JJ, Lazo-Porrás M, Puhong Z, Xuanchen T, Ahlgren JÁ, Bernabe-Ortiz A, et al. Quality of stroke guidelines in low- and middle-income countries: a systematic review. *Bulletin of the World Health Organization*. 2021;99:640-652E. doi: 10.2471/BLT.21.285845
4. Atkins D, Best D, Briss PA, Eccles M, Falck-Ytter Y, Flottorp S, Guyatt GH, Harbour RT, Haugh MC, Henry D, et al. Grading quality of evidence and strength of recommendations. *Bmj*. 2004;328:1490. doi: 10.1136/bmj.328.7454.1490
5. Michie S, van Stralen MM, West R. The behaviour change wheel: a new method for characterising and designing behaviour change interventions. *Implement Sci*. 2011;6:42. doi: 10.1186/1748-5908-6-42
6. Institute of Medicine Committee on Standards for Systematic Reviews of Comparative Effectiveness R. In: Eden J, Levit L, Berg A, Morton S, eds. *Finding What Works in Health Care: Standards for Systematic Reviews*. Washington (DC): National Academies Press (US) Copyright 2011 by the National Academy of Sciences. All rights reserved.; 2011.
7. Winstein CJ, Stein J, Arena R, Bates B, Cherney LR, Cramer SC, Deruyter F, Eng JJ, Fisher B, Harvey RL, et al. Guidelines for Adult Stroke Rehabilitation and Recovery: A Guideline for Healthcare Professionals From the American Heart Association/American Stroke Association. *Stroke*. 2016;47:e98-e169. doi: 10.1161/str.0000000000000098
8. Veerbeek J, van Wegen E, Peppen RPS, Hendriks E, Rietberg MB, Wees PJ, Heijblom K, Goos AAG, Hanssen WO, Wel BC, et al. Clinical Practice Guideline for Physical Therapy after Stroke (Dutch: KNGF-richtlijn Beroerte). 2014.
9. Nederlandse Vereniging voor Neurologie. Richtlijn herseninfarct en hersenbloeding [Internet]. 2017. Available from: [kennisnetwerkcva.nl/wp-content/uploads/2018/08/Richtlijn-herseninfarct-en-hersenbloeding-2017.pdf](https://kennisnetwerkcva.nl/wp-content/uploads/2018/08/Richtlijn-herseninfarct-en-hersenbloeding-2017.pdf) Accessed 21 November 2022.

10. Hebert D, Lindsay MP, McIntyre A, Kirton A, Rumney PG, Bagg S, Bayley M, Dowlathshahi D, Dukelow S, Garnhum M, et al. Canadian stroke best practice recommendations: Stroke rehabilitation practice guidelines, update 2015. *International journal of stroke : official journal of the International Stroke Society*. 2016;11:459-484. doi: 10.1177/1747493016643553
11. Norrving B, Barrick J, Davalos A, Dichgans M, Cordonnier C, Guekht A, Kutluk K, Mikulik R, Wardlaw J, Richard E, et al. Action Plan for Stroke in Europe 2018–2030. *European Stroke Journal*. 2018. doi: 10.1177/2396987318808719
12. Stroke Foundation. Clinical Guidelines for Stroke Management. Melbourne Australia [Internet]. 2019. Available from: <https://informme.org.au/Guidelines/Clinical-Guidelines-for-Stroke-Management-2017> Accessed 21 November 2022.
13. Stroke Foundation of New Zealand and New Zealand Guidelines Group. New Zealand Clinical Guidelines for Stroke Management. Wellington 2010. In.
14. National Institute of Health and Care Excellence. Overview | Stroke and transient ischaemic attack in over 16s: diagnosis and initial management | Guidance | NICE [Internet]. 2019 [cited 2020 Jan 12]. Available from: <https://www.nice.org.uk/guidance/ng128> Accessed 21 November 2022.
15. Lindsay P, Furie KL, Davis SM, Donnan GA, Norrving B. World stroke organization global stroke services guidelines and action plan. *International Journal of Stroke*. 2014;9:4-13. doi: 10.1111/ij.s.12371
16. Owolabi M, Miranda JJ, Yaria J, Ovbiagele B. Controlling cardiovascular diseases in low and middle income countries by placing proof in pragmatism. *BMJ Global Health*. 2016;1. doi: 10.1136/bmjgh-2016-000105
17. Owolabi M, Olowoyo P, Miranda JJ, Akinyemi R, Feng W, Yaria J, Makanjuola T, Yaya S, Kaczorowski J, Thabane L, et al. Gaps in Hypertension Guidelines in Low- and Middle-Income Versus High-Income Countries: A Systematic Review. *Hypertension (Dallas, Tex : 1979)*. 2016;68:1328-1337. doi: 10.1161/HYPERTENSIONAHA.116.08290
18. Owolabi MO, Yaria JO, Daivadanam M, Makanjuola AI, Parker G, Oldenburg B, Vedanthan R, Norris S, Oguntoye AR, Osundina MA, et al. Gaps in Guidelines for the Management of Diabetes in Low- and Middle-Income Versus High-Income Countries-A Systematic Review. *Diabetes Care*. 2018;41:1097-1105. doi: 10.2337/dc17-1795
19. Feigin VL, Stark BA, Johnson CO, Roth GA, Bisignano C, Abady GG, et al. Global, regional, and national burden of stroke and its risk factors, 1990–2019: a systematic analysis for the Global Burden of Disease Study 2019. *Lancet Neurology*. 2021;20:795-820 doi.org/710.1016/S1474-4422(1021)00252-00250. doi: doi.org/10.1016/S1474-4422(21)00252-0
20. Vos T, Lim SS, Abbafati C, Abbas KM, Abbasi M, Abbasifard M, Abbasi-Kangevari M, Abbastabar H, Abd-Allah F, Abdelalim A, et al. Global burden of 369 diseases and injuries in 204 countries and territories, 1990–2019: a systematic analysis for the Global Burden of Disease Study 2019. *The Lancet*. 2020;396:1204-1222. doi: [https://doi.org/10.1016/S0140-6736\(20\)30925-9](https://doi.org/10.1016/S0140-6736(20)30925-9)
21. Abajobir AA, Abate KH, Abbafati C, Abbas KM, Abd-Allah F, Abera SF, Abraha HN, Abu-Raddad LJ, Abu-Rmeileh NME, Adedeji IA, et al. Global, regional, and national under-5 mortality, adult mortality, age-specific mortality, and life expectancy, 1970-2016: a systematic analysis for the Global Burden of Disease Study 2016. *The Lancet*. 2017;390:1084-1150. doi: 10.1016/S0140-6736(17)31833-0
22. Foreman KJ, Marquez N, Dolgert A, Fukutaki K, Fullman N, McGaughey M, Pletcher MA, Smith AE, Tang K, Yuan C-W, et al. Forecasting life expectancy, years of life lost, and all-cause and cause-specific mortality for 250 causes of death: reference and alternative scenarios for 2016-40 for 195 countries and territories. *The Lancet*. 2018;392:2052-2090. doi: 10.1016/S0140-6736(18)31694-5

23. Vollset SE, Goren E, Yuan C-W, Cao J, Smith AE, Hsiao T, Bisignano C, Azhar GS, Castro E, Chalek J, et al. Fertility, mortality, migration, and population scenarios for 195 countries and territories from 2017 to 2100: a forecasting analysis for the Global Burden of Disease Study. *The Lancet*. 2020;396:1285-1306. doi: 10.1016/S0140-6736(20)30677-2
24. Yin RK. Case study research: Design and methods. Vol. 5. sage; 2009  
<https://www.jstor.org/stable/23279888> Accessed 21 november 2022.
25. John L, William A, Dawar D, Khatter H, Singh P, Andrias A, Mochahari C, Langhorne P, Pandian J. Implementation of a Physician-Based Stroke Unit in a Remote Hospital of North-East India-Tezpur Model. *J Neurosci Rural Pract*. 2021;12:356-361. doi: 10.1055/s-0041-1723099
26. Sharma S, Padma MV, Bhardwaj A, Sharma A, Sawal N, Thakur S. Telestroke in resource-poor developing country model. *Neurol India*. 2016;64:934-940. doi: 10.4103/0028-3886.190243
27. Singh S, Kate M, Samuel C, Kamra D, Kaliyaperumal A, Nandi J, Khatter H, Sharma M, Pandian J. Rural Stroke Surveillance and Establishment of Acute Stroke Care Pathway Using Frontline Health Workers in Rural Northwest India: The Ludhiana Experience. *Neuroepidemiology*. 2021;55:297-305. doi: 10.1159/000515636
28. Pandian JD, Kalkonde Y, Sebastian IA, Felix C, Urimubenshi G, Bosch J. Stroke systems of care in low-income and middle-income countries: challenges and opportunities. *The Lancet*. 2020;396:1443-1451. doi: 10.1016/S0140-6736(20)31374-X
29. Wang Y, Liao X, Zhao X, Wang DZ, Wang C, Nguyen-Huynh MN, Zhou Y, Liu L, Wang X, Liu G, et al. Using recombinant tissue plasminogen activator to treat acute ischemic stroke in China: analysis of the results from the Chinese National Stroke Registry (CNSR). *Stroke*. 2011;42:1658-1664. doi: 10.1161/strokeaha.110.604249
30. Wang H-Y, Gu H-Q, Zhou Q, Jiang Y-Y, Yang X, Wang C-J, Zhao X-Q, Wang Y-L, Liu L-P, Meng X, et al. Thrombolysis, time-to-treatment and in-hospital outcomes among young adults with ischaemic stroke in China: findings from a nationwide registry study in China. *BMJ Open*. 2022;12:e055055. doi: 10.1136/bmjopen-2021-055055
31. Huang Y, Wang JG, Wei JW, Headley AP, Wong LK, Heeley EL, Arima H, Sun J, Li Q, Liu M, et al. Age and gender variations in the management of ischaemic stroke in China. *International journal of stroke : official journal of the International Stroke Society*. 2010;5:351-359. doi: 10.1111/j.1747-4949.2010.00460.x
32. Martins SC, Sacks C, Hacke W, Brainin M, Figueiredo FDA, Pontes-Neto O, al. e. Priorities to reduce the burden of stroke in Latin American countries. *The Lancet Neurology*. 2019;18:674-683.
33. Martins SCO, Pontes-Neto OM, Alves CV, de Freitas GR, Filho JO, Tosta ED, Cabral NL, Brazilian Stroke N. Past, present, and future of stroke in middle-income countries: the Brazilian experience. *International Journal of Stroke: Official Journal of the International Stroke Society*. 2013;8 Suppl A100:106-111. doi: 10.1111/ijis.12062
34. Martins SO, Mont'Alverne F, Rebello LC, Abud DG, Silva GS, Lima FO, Parente BSM, Nakiri GS, Faria MB, Frudit ME, et al. Thrombectomy for Stroke in the Public Health Care System of Brazil. *New Engl J Med*. 2020;382:2316-2326. doi: 10.1056/NEJMoa2000120
35. Oliveira GMMd, Brant LCC, Polanczyk CA, Malta DC, Biolo A, Nascimento BR, Souza MdfMd, Lorenzo ARD, Júnior AAdPF, Schaan BD, et al. Estatística Cardiovascular – Brasil 2021. *Arquivos Brasileiros de Cardiologia*. 2022;118:115-373. doi: 10.36660/abc.20211012
36. Martins SCO, Weiss G, Almeida AG, Brondani R, Carbonera LA, de Souza AC, Martins MCO, Nasi G, Nasi LA, Batista C, et al. Validation of a Smartphone Application in the Evaluation and Treatment of Acute Stroke in a Comprehensive Stroke Center. *Stroke*. 2020;51:240-246. doi: 10.1161/STROKEAHA.119.026727
37. Martins Sheila CO, Weiss G, Almeida Andrea G, Brondani R, Carbonera Leonardo A, de Souza Ana C, Martins Magda Carla O, Nasi G, Nasi Luiz A, Batista C, et al. Validation of a Smartphone Application in the Evaluation and Treatment of Acute Stroke in a

- Comprehensive Stroke Center. *Stroke*. 2020;51:240-246. doi: 10.1161/STROKEAHA.119.026727
38. Aguilera I, Infante A, Ormeño H, Urriola C. Improving health system efficiency: Chile: Implementation of the Universal Access with Explicit Guarantees (AUGE) reform. In: Geneva: World Health Organization; 2015.
  39. República de Chile. Ministerio de Salud. Decreto N°72 Aprueba Garantías Explícitas en Salud del Régimen General de Garantías en Salud [Internet]. 2022. Disponible en: <https://www.minsal.cl/wp-content/uploads/2022/09/Decreto-72.pdf> Accessed 20 Dec 2022.
  40. Martins SCO, Lavados P, Secchi TL, Brainin M, Ameriso S, Gongora-Rivera F, Sacks C, Cantú-Brito C, Alvarez Guzman TF, Pérez-Romero GE, et al. Fighting Against Stroke in Latin America: A Joint Effort of Medical Professional Societies and Governments. *Frontiers in neurology*. 2021;12:743732. doi: 10.3389/fneur.2021.743732
  41. Achutti A, Stein R, Pellanda L, Duncan BB. Gramado Declaration: The Impact of 20 Years of Cardiovascular Prevention. *Arq Bras Cardiol*. 2017;108:193-194. doi: 10.5935/abc.20170040
  42. Aref H, Zakaria M, Shokri H, Roushdy T, El Basiouny A, El Nahas N. Changing the Landscape of Stroke in Egypt. *Cerebrovascular Diseases Extra*. 2021;11:155-159. doi: 10.1159/000521271
  43. Fenta EH, Sisay BG, Gebreyesus SH, Endris BS. Trends and causes of adult mortality from 2007 to 2017 using verbal autopsy method, Addis Ababa, Ethiopia. *BMJ Open*. 2021;11:e047095. doi: 10.1136/bmjopen-2020-047095
  44. Proios H, Baskini M, Keramydas C, Pourliaka T, Tsakpounidou K. Can We Learn from Our Children About stroke? Effectiveness of a School-Based Educational Programme in Greece. *Journal of Stroke and Cerebrovascular Diseases*. 2022;31:106544. doi: <https://doi.org/10.1016/j.jstrokecerebrovasdis.2022.106544>
  45. Tsakpounidou K, Proios H. Preschool children deliver stroke knowledge to their families with the FAST 112 Heroes educational programme. *Health Education Journal*. 2021;80:529-540. doi: 10.1177/0017896921990406
  46. Tsakpounidou K, Psomiadis S, Pourliaka T, Akritidou M, Proios H. Baseline Stroke Literacy of Young Children Based on "FAST 112 Heroes" Program. *Front Public Health*. 2021;9:638516. doi: 10.3389/fpubh.2021.638516
  47. de Souza AC, Martins SO, Polanczyk CA, Araújo DV, Etges APBS, Zanotto BS, Neyeloff JL, Carbonera LA, Chaves MLF, de Carvalho JF, et al. Cost-effectiveness of mechanical thrombectomy for acute ischemic stroke in Brazil: Results from the RESILIENT trial. *International Journal of Stroke*. 2021;17:855-862. doi: 10.1177/17474930211055932
  48. Waqas M, Gong AD, Levy BR, Dossani RH, Vakharia K, Cappuzzo JM, Becker A, Sonig A, Tutino VM, Almayman F, et al. Is Endovascular Therapy for Stroke Cost-Effective Globally? A Systematic Review of the Literature. *Journal of stroke and cerebrovascular diseases : the official journal of National Stroke Association*. 2021;30:105557. doi: 10.1016/j.jstrokecerebrovasdis.2020.105557
  49. Zachrisson KS, Schwamm LH. Strategic Opportunities to Improve Stroke Systems of Care. *Jama*. 2022;327:1765-1767. doi: 10.1001/jama.2022.3820
  50. Asif K, Herial N, Otite O, Desai S, Gutierrez SO, Dmytriw A, Al-Mufti F, Khandelwal P, Inoa V, galav s, et al. Access to Mechanical Thrombectomy for Large Vessel Occlusion Stroke: An MT2020+ Report on Global Disparities (S6.006). *Neurology*. 2022;98:3419.
  51. The fight against stroke must go on. *The Lancet Neurology*. 2020;19:369. doi: 10.1016/S1474-4422(20)30107-1
  52. Ormseth CH, Sheth KN, Saver JL, Fonarow GC, Schwamm LH. The American Heart Association's Get With the Guidelines (GWTG)-Stroke development and impact on stroke care. *Stroke Vasc Neurol*. 2017;2:94-105. doi: 10.1136/svn-2017-000092
  53. Fonarow GC, Smith EE, Saver JL, Reeves MJ, Hernandez AF, Peterson ED, Sacco RL, Schwamm LH. Improving Door-to-Needle Times in Acute Ischemic Stroke. *Stroke*. 2011;42:2983-2989. doi: 10.1161/STROKEAHA.111.621342

54. Xian Y, Xu H, Smith EE, Saver JL, Reeves MJ, Bhatt DL, Hernandez AF, Peterson ED, Schwamm LH, Fonarow GC. Achieving More Rapid Door-to-Needle Times and Improved Outcomes in Acute Ischemic Stroke in a Nationwide Quality Improvement Intervention. *Stroke*. 2022;53:1328-1338. doi: 10.1161/strokeaha.121.035853
55. Kwon HR, Silva EA. Mapping the Landscape of Behavioral Theories: Systematic Literature Review. *Journal of Planning Literature*. 2020;35:161-179. doi: 10.1177/0885412219881135
56. National Institute for Health and Clinical Excellence. Behaviour change at population, community and individual levels. NICE; 2007 <https://www.ncsct.co.uk/usr/pub/guidance-on-behaviour-change-at-population.pdf> Accessed 21 November 2022.
57. Bernhardt J, Urimubenshi G, Gandhi DBC, Eng JJ. Stroke rehabilitation in low-income and middle-income countries: a call to action. *The Lancet*. 2020;396:1452-1462. doi: 10.1016/S0140-6736(20)31313-1
58. Tawa N, Rhoda A, Brink Y, Urimubenshi G, Giljam-Enright M, Charumbira MY, Niekerk SM, Louw Q. Human Functioning, Technology and Health

Stroke rehabilitation services in Africa – Challenges and opportunities: A scoping review of the literature. In: Louw Q, ed. *Collaborative capacity development to complement stroke rehabilitation in Africa*. Cape Town (ZA): Aosis

Copyright © Quinette Louw.; 2020.

59. Bright T, Wallace S, Kuper H. A Systematic Review of Access to Rehabilitation for People with Disabilities in Low- and Middle-Income Countries. *International Journal of Environmental Research and Public Health*. 2018;15. doi: 10.3390/ijerph15102165
60. Ekechukwu END, Olowoyo P, Nwankwo KO, Olaleye OA, Ogbodo VE, Hamzat TK, Owolabi MO. Pragmatic Solutions for Stroke Recovery and Improved Quality of Life in Low- and Middle-Income Countries-A Systematic Review. *Front Neurol*. 2020;11:337. doi: 10.3389/fneur.2020.00337
61. Odongo CO, Talbert-Slagle K. Training the next generation of Africa's doctors: why medical schools should embrace the team-based learning pedagogy. *BMC Medical Education*. 2019;19:403. doi: 10.1186/s12909-019-1845-y
62. Tumlinson K, Jaff D, Stilwell B, Onyango DO, Leonard KL. Reforming medical education admission and training in low- and middle-income countries: who gets admitted and why it matters. *Human resources for health*. 2019;17:91. doi: 10.1186/s12960-019-0426-9
63. Cronk R, Bartram J. Environmental conditions in health care facilities in low- and middle-income countries: Coverage and inequalities. *Int J Hyg Environ Health*. 2018;221:409-422. doi: 10.1016/j.ijheh.2018.01.004
64. Al-Shamsi M. Addressing the physicians' shortage in developing countries by accelerating and reforming the medical education: Is it possible? *J Adv Med Educ Prof*. 2017;5:210-219.
65. National health mission M of health and family welfare. 13th common review mission report [Internet]. 2019. Available from: [https://nhsrcindia.org/sites/default/files/2021-04/13th\\_common\\_review\\_mission-Report\\_2019\\_Revise.pdf](https://nhsrcindia.org/sites/default/files/2021-04/13th_common_review_mission-Report_2019_Revise.pdf) Accessed on 21 November 2022.
66. National health mission M of health and family welfare. National Programme for prevention & Control of Cancer, Diabetes, Cardiovascular Diseases & stroke (NPCDCS) :: National Health Mission <http://nhm.gov.in/index1.php?lang=1&level=2&sublinkid=1048&lid=604> Accessed on 21 November 2022.
67. Owolabi MO, Platz T, Good D, Dobkin BH, Ekechukwu END, Li L. Editorial: Translating Innovations in Stroke Rehabilitation to Improve Recovery and Quality of Life Across the Globe. *Front Neurol*. 2020 Dec 14;11:630830.
68. Fanelli S, Salvatore FP, De Pascale G, Faccilongo N. Insights for the future of health system partnerships in low- and middle-income countries: a systematic literature review. *BMC Health Services Research*. 2020;20:571. doi: 10.1186/s12913-020-05435-8



69. Platz T. Clinical Pathways in Stroke Rehabilitation Evidence-based Clinical Practice Recommendations: Evidence-based Clinical Practice Recommendations. 2021. <https://library.oapen.org/bitstream/id/67fc3f34-9617-4947-88ed-1e569fa00aa8/978-3-030-58505-1.pdf> Accessed on 21 November 2022.
70. Leonardi M, Fheodoroff K. Goal Setting with ICF (International Classification of Functioning, Disability and Health) and Multidisciplinary Team Approach in Stroke Rehabilitation. In: Platz T, editor. Clinical Pathways in Stroke Rehabilitation [Internet]. Cham: Springer International Publishing; 2021. p. 35–56. [http://link.springer.com/10.1007/978-3-030-58505-1\\_3](http://link.springer.com/10.1007/978-3-030-58505-1_3) Accessed on 21 November 2022.
71. Platz T. Evidence-Based Guidelines and Clinical Pathways in Stroke Rehabilitation-An International Perspective. *Frontiers in neurology*. 2019;10:200. doi: 10.3389/fneur.2019.00200
72. Langhorne P, Ramachandra S. Organised inpatient (stroke unit) care for stroke: network meta-analysis. *The Cochrane database of systematic reviews*. 2020;4:CD000197. doi: 10.1002/14651858.CD000197.pub4
73. Mehrholz J, Pohl M, Platz T, Kugler J, Elsner B. Electromechanical and robot-assisted arm training for improving activities of daily living, arm function, and arm muscle strength after stroke. *Cochrane Database of Systematic Reviews*. 2018. doi: 10.1002/14651858.CD006876.pub5
74. Mehrholz J, Pohl M, Kugler J, Elsner B. Electromechanical-Assisted Training for Walking After Stroke. *Stroke*. 2021;52:e153-e154. doi: doi:10.1161/STROKEAHA.120.033755
75. Mehrholz J, Thomas S, Elsner B. Treadmill training and body weight support for walking after stroke. *The Cochrane database of systematic reviews*. 2017;8:CD002840. doi: 10.1002/14651858.CD002840.pub4
76. Dromerick AW, Geed S, Barth J, Brady K, Giannetti ML, Mitchell A, Edwardson MA, Tan MT, Zhou Y, Newport EL, et al. Critical Period After Stroke Study (CPASS): A phase II clinical trial testing an optimal time for motor recovery after stroke in humans. *Proc Natl Acad Sci U S A*. 2021;118. doi: 10.1073/pnas.2026676118
77. Burnes, Bernard, Complexity Theories and Organizational Change. *International Journal of Management Reviews*, Vol. 7, No. 2, pp. 73-90, June 2005, Available at SSRN: <https://ssrn.com/abstract=857588> or <http://dx.doi.org/10.1111/j.1468-2370.2005.00107.x>.
78. Tuffin R. Implications of complexity theory for clinical practice and healthcare organization. *BJA Education*. 2016;16:349-352. doi: 10.1093/bjaed/mkw013
79. Thompson DS, Fazio X, Kustra E, Patrick L, Stanley D. Scoping review of complexity theory in health services research. *BMC Health Services Research*. 2016;16:87. doi: 10.1186/s12913-016-1343-4
80. Baatiema L, Sanuade O, Kuumuori Ganle J, Sumah A, Baatiema L, Sumankuuro J. An ecological approach to understanding stroke experience and access to rehabilitation services in Ghana: A cross-sectional study. *Health Soc Care Community*. 2021;29:e67-e78. doi: 10.1111/hsc.13243
81. Verberne DPJ, van Mastrigt GAPG, Ponds RWHM, van Heugten CM, Kroese MEAL. Economic evaluation of nurse-led stroke aftercare addressing long-term psychosocial outcome: a comparison to care-as-usual. *BMJ Open*. 2021;11:e039201. doi: 10.1136/bmjopen-2020-039201
82. English C, Ceravolo MG, Dorsch S, Drummond A, Gandhi DBC, Halliday Green J, Schelfaut B, Verschure P, Urimubenshi G, Savitz S. Telehealth for rehabilitation and recovery after stroke: State of the evidence and future directions. *International Journal of Stroke*. 2022;17:487-493. doi: 10.1177/17474930211062480
83. Eng JJ, Bird ML, Godecke E, Hoffmann TC, Laurin C, Olaoye OA, Solomon J, Teasell R, Watkins CL, Walker MF. Moving stroke rehabilitation research evidence into clinical practice: Consensus-based core recommendations from the Stroke Recovery and Rehabilitation



- Roundtable. *International journal of stroke : official journal of the International Stroke Society*. 2019;14:766-773. doi: 10.1177/1747493019873597
84. Gururaj S, Bird ML, Borschmann K, Eng JJ, Watkins CL, Walker MF, Solomon JM. Evidence-based stroke rehabilitation: do priorities for practice change and feasibility of implementation vary across high income, upper and lower-middle income countries? *Disabil Rehabil*. 2022;44:4611-4618. doi: 10.1080/09638288.2021.1910737
  85. He M, Wang Je, Dong Q, Ji N, Meng P, Liu N, Geng S, Qin S, Xu W, Zhang C, et al. Community-based stroke system of care improves patient outcomes in Chinese rural areas. *Journal of Epidemiology and Community Health*. 2018;72:630. doi: 10.1136/jech-2017-210185
  86. Owolabi MO, Suwanwela NC, Yaria J. Barriers to implementation of evidence into clinical practice in low-resource settings. *Nature Reviews Neurology*. 2022;18:451-452. doi: 10.1038/s41582-022-00690-1
  87. Niama Natta DD, Lejeune T, Detrembleur C, Yarou B, Sogbossi ES, Alagnidé E, Kpadonou T, Selves C, Stoquart G. Effectiveness of a self-rehabilitation program to improve upper-extremity function after stroke in developing countries: A randomized controlled trial. *Ann Phys Rehabil Med*. 2021;64:101413. doi: 10.1016/j.rehab.2020.03.017
  88. Zhou B, Zhang J, Zhao Y, Li X, Anderson CS, Xie B, Wang N, Zhang Y, Tang X, Prvu Bettger J, et al. Caregiver-Delivered Stroke Rehabilitation in Rural China. *Stroke*. 2019;50:1825-1830. doi: 10.1161/strokeaha.118.021558
  89. Lindley RI, Anderson CS, Billot L, Forster A, Hackett ML, Harvey LA, Jan S, Li Q, Liu H, Langhorne P, et al. Family-led rehabilitation after stroke in India (ATTEND): a randomised controlled trial. *The Lancet*. 2017;390:588-599. doi: 10.1016/S0140-6736(17)31447-2
  90. Liu H, Lindley R, Alim M, Felix C, Gandhi DBC, Verma SJ, Tugnawat DK, Syrigapu A, Ramamurthy RK, Pandian JD, et al. Family-led rehabilitation in India (ATTEND)—Findings from the process evaluation of a randomized controlled trial. *International Journal of Stroke*. 2018;14:53-60. doi: 10.1177/1747493018790076
  91. Kwakkel G, van Wegen EEH. Family-delivered rehabilitation services at home: is the glass empty? *Lancet*. 2017;390:538-539. doi: 10.1016/s0140-6736(17)31489-7
  92. Olaleye OA, Hamzat TK, Owolabi MO. Development and evaluation of the Primary Healthcare-based Physiotherapy Intervention and its effects on selected indices of stroke recovery. *International Journal of Therapy and Rehabilitation*. 2013;20:443-449. doi: 10.12968/ijtr.2013.20.9.443
  93. Olaleye OA, Hamzat TK, Owolabi MO. Stroke rehabilitation: should physiotherapy intervention be provided at a primary health care centre or the patients' place of domicile? *Disabil Rehabil*. 2014;36:49-54. doi: 10.3109/09638288.2013.777804
  94. Vloothuis JD, Mulder M, Veerbeek JM, Konijnenbelt M, Visser-Meily JM, Ket JC, Kwakkel G, van Wegen EE. Caregiver-mediated exercises for improving outcomes after stroke. *The Cochrane database of systematic reviews*. 2016;12:CD011058. doi: 10.1002/14651858.CD011058.pub2
  95. Kuo LM, Huang HL, Huang HL, Liang J, Chiu YC, Chen ST, Kwok YT, Hsu WC, Shyu YI. A home-based training program improves Taiwanese family caregivers' quality of life and decreases their risk for depression: a randomized controlled trial. *Int J Geriatr Psychiatry*. 2013;28:504-513. doi: 10.1002/gps.3853
  96. Cramer SC, Dodakian L, Le V, See J, Augsburger R, McKenzie A, Zhou RJ, Chiu NL, Heckhausen J, Cassidy JM, et al. Efficacy of Home-Based Telerehabilitation vs In-Clinic Therapy for Adults After Stroke: A Randomized Clinical Trial. *JAMA Neurol*. 2019;76:1079-1087. doi: 10.1001/jamaneurol.2019.1604
  97. Hempler I, Woitha K, Thielhorn U, Farin E. Post-stroke care after medical rehabilitation in Germany: a systematic literature review of the current provision of stroke patients. *BMC Health Serv Res*. 2018;18:468. doi: 10.1186/s12913-018-3235-2

98. Rodgers H, Price C. Stroke unit care, inpatient rehabilitation and early supported discharge. *Clin Med (Lond)*. 2017;17:173-177. doi: 10.7861/clinmedicine.17-2-173
99. Hug A, Spingler T, Hensel C, Fichtner S, Daniel T, Heutehaus L, Wensing M, Rupp R, Weidner N. Goal attainment in mobility after acute rehabilitation of mobility-restricting paralysis syndromes with regard to the ambulatory therapeutic level of participation NeuroMoves. *BMC Neurology*. 2021;21:149. doi: 10.1186/s12883-021-02167-y
100. D Bloom, D Canning, L Hu, Y Liu, A Mahal, W Yip "Why has China's economy taken off faster than India's?" *Journal of Comparative Economics* 38(1):17-33, 2010
101. Krishnamurthi R, Barker-Collo S, A. T, Bhattacharjee R, George AS, Arroll B, Ranta A, Walters D, Wilson D, Sandiford P, et al. Mobile technology for primary stroke prevention: a proof-of-concept pilot randomised controlled trial - a brief report. *Stroke*. 2018;50:196-198.
102. Krishnamurthi R, Bhattacharjee R, Parmar P, George A, A. T, Wilson D, Tippett L, Barber A, Barker-Collo S, Sheth KN, et al. Effectiveness of the Stroke Riskometer App for Primary Stroke Prevention: A Pilot RCT. Final Program of the International Stroke Conference in Los Angeles, USA 23-26 January 2018. *Late-Breaking News Science Abstracts of of the International Stroke Conference 24 January 2018*. 2018;Presentation Number LBP18:page 85.
103. Mat Said Z, Tengku Ismail TA, Abdul Hamid A, Sahathevan R, Abdul Aziz Z, Musa KI. The Malay version of the attitudes and beliefs about cardiovascular disease (ABCD-M) risk questionnaire: a translation, reliability and validation study. *BMC Public Health*. 2022;22:1412. doi: 10.1186/s12889-022-13811-8
104. Mat Said Z, Musa KI, Tengku Ismail TA, Abdul Hamid A, Sahathevan R, Abdul Aziz Z, Feigin V. The Effectiveness of Stroke Riskometer™ in Improving Stroke Risk Awareness in Malaysia: A Study Protocol of a Cluster-Randomized Controlled Trial. *Neuroepidemiology*. 2021;55:436-446. doi: 10.1159/000518853
105. Martins S, Brainin M, Bath PM, Sacco RL, Hankey GJ, Anderson C, Sposato LA, Renato L, Berwanger O, Falavigna M, et al. Polipill and Riskometer to prevent stroke and cognitive impairment in primary health care - PROMOTE Study. *International Journal of Stroke*. 2021;16(25):Supplement. Abstract 142; WSCC121-870. DOI: 110.1177/17474930211041949.
106. George SA. Investigating the Modulators of Health Behaviour Change Using the Novel AUT Stroke Riskometer Application. 2021 <http://hdl.handle.net/10292/14314>.
107. Parmar P, Krishnamurthi R, Ikram MA, Hofman A, Mirza SS, Varakin Y, Kravchenko M, Piradov M, Thrift AG, Norrving B, et al. The Stroke Riskometer(TM) App: validation of a data collection tool and stroke risk predictor. *International Journal of Stroke*. 2015;10:231-244. doi: 10.1111/ijvs.12411
108. Medvedev O, Truong Q, Merkin A, Borotkanics R, Krishnamurthi R, Feigin V. Cross-cultural validation of the Stroke Riskometer using generalizability theory. *Scientific Reports Nature Portfolio*. 2021;11:19064 doi.org/19010.11038/s41598-19021-98591-19068. doi: 10.1038/s41598-021-98591-8
109. Brainin M, Feigin VL, Norrving B, Martins SCO, Hankey GJ, Hachinski V. Global prevention of stroke and dementia: the WSO Declaration. *The Lancet Neurology*. 2020;19:487-488. doi: 10.1016/S1474-4422(20)30141-1
110. Brainin M, Feigin V, Martins S, Matz K, Roy J, Sandercock P, Teuschl Y, Tuomilehto J, Wiseman A. Cut stroke in half: Polypill for primary prevention in stroke. *International Journal of Stroke*. 2018;13:633-647. doi: 10.1177/1747493018761190
111. Acting on Stroke and NCDs: Preventing and Responding to stroke to work towards Universal Health Coverage 2022. Policy brief co-authored by NCD Alliance, World Stroke Organization and American Stroke Association (Mia Grupper, Sarah Belson, Anita Wiseman, Bo Norrving, Valery Feigin, Diana Vaca McGhie, Stephanie Mohl). [https://ncdalliance.org/sites/default/files/Acting%20on%20Stroke%20and%20NCDs\\_2022\\_PolicyBrief\\_Final%20for%20web.pdf](https://ncdalliance.org/sites/default/files/Acting%20on%20Stroke%20and%20NCDs_2022_PolicyBrief_Final%20for%20web.pdf) Accessed 9 November 2022. In.

112. Feigin VL, Krishnamurthi R, Merkin A, Nair B, Kravchenko M, Jalili-Moghaddam S. Digital solutions for primary stroke and cardiovascular disease prevention: a mass individual and public health approach. *The Lancet Regional Health - Western Pacific*. 2022;100511:<https://doi.org/10.1016/j.lanwpc.2022.100511>.
113. Bloom DE, Canning D, Hu L, Liu Y, Mahal AS, Yip WC-m. The Contribution of Population Health and Demographic Change to Economic Growth in China and India. *J Comp Econ*. 2010;38(1):17-33.
114. Riley L, Guthold R, Cowan M, Savin S, Bhatti L, Armstrong T, Bonita R. The World Health Organization STEPwise Approach to Noncommunicable Disease Risk-Factor Surveillance: Methods, Challenges, and Opportunities. *American Journal of Public Health*. 2016;106:74-78. doi: 10.2105/AJPH.2015.302962
115. Eurostat. European Health Interview Survey (EHIS): Eurostat metadata. [https://ec.europa.eu/eurostat/cache/metadata/en/hlth\\_det\\_esms.htm#:~:text=EHIS%20wave%203%20\(2019%20round,\(for%20instance%2C%20Albania\)](https://ec.europa.eu/eurostat/cache/metadata/en/hlth_det_esms.htm#:~:text=EHIS%20wave%203%20(2019%20round,(for%20instance%2C%20Albania))). (accessed July 7 2022).
116. Ministry of Health and Welfare (Andorra). Andorra National Health Survey 2011. 2011. <https://ghdx.healthdata.org/record/andorra-national-health-survey-2011>. Accessed 22 Nov 2022.
117. Instituto Nacional de Estadística (INE) MdSMI. Inquérito de Indicadores Múltiplos e de Saúde (IIMS), 2015-2016. 2017.
118. Pou SA, Diaz MDP, Velázquez GA, Aballay LR. Sociodemographic disparities and contextual factors in obesity: updated evidence from a National Survey of Risk Factors for Chronic Diseases. *Public Health Nutrition*. 2022;25:3377-3389. doi: 10.1017/S1368980021004924
119. National Statistical Service NSSA, Ministry of Health MOHA, Icf. Armenia Demographic and Health Survey 2015-16. 2017. <http://dhsprogram.com/pubs/pdf/FR325/FR325.pdf> (accessed Aug 4 2022).
120. National Institute of Population R, Training N, Ministry of H, Family W, Icf. Bangladesh Demographic and Health Survey 2017-18. 2020. <https://www.dhsprogram.com/pubs/pdf/FR344/FR344.pdf> (accessed Aug 20 2022).
121. Nguyen D, Hautekiet P, Berete F, Braekman E, Charafeddine R, Demarest S, Drieskens S, Gisle L, Hermans L, Tafforeau J, et al. The Belgian health examination survey: objectives, design and methods. *Archives of Public Health*. 2020;78:50. doi: 10.1186/s13690-020-00428-9
122. The Central American Diabetes Initiative. Survey of diabetes, hypertension and chronic disease risk factors, Belize. 2009. [https://iris.paho.org/bitstream/handle/10665.2/7687/9789275132869\\_eng.pdf?sequence=1&isAllowed=y](https://iris.paho.org/bitstream/handle/10665.2/7687/9789275132869_eng.pdf?sequence=1&isAllowed=y) (accessed Sep 11 2022).
123. Institut National de la Statistique et de l'Analyse É, Icf. République Du Bénin Ciquième Enquête Démographique et de Santé au Bénin (EDSB-V) 2017-2018. 2019. <http://dhsprogram.com/pubs/pdf/FR350/FR350.pdf> (accessed Jul 17 2022).
124. Coa R, Ochoa LH. Bolivia Encuesta Nacional de Demografía y Salud 2008. 2009. <http://dhsprogram.com/pubs/pdf/FR228/FR228.pdf> (accessed Sep 2 2022).
125. Institute of Public Health FMOH, Bosnia and Herzegovina, . Survey of health status of the population of the Federation of BIH in 2012, with a comparison to the survey conducted in 2002. 2012. <http://www.zzjzfbih.ba/wp-content/uploads/2009/02/Istra%C3%85%C2%BEivanje-finalna-verzija-24.03.2014.-ENG.compressed.pdf> Accessed 22 Nov 2022.
126. Brazilian Institute of Geography and Statistics (IBGE) MoEB, Ministry of Health (Brazil),. Brazil National Health Survey 2019. <https://ghdx.healthdata.org/record/brazil-national-health-survey-2019> Accessed 22 nov 2022.

127. National Statistical Institute of Bulgaria. European health interview survey. <https://nsi.bg/en/content/3365/%D0%BC%D0%B5%D1%82%D0%B0%D0%B4%D0%B0%D0%BD%D0%BD%D0%B8/european-health-interview-survey> Accessed 22 Nov 2022.
128. Ministère à la Présidence chargé de la Bonne Gouvernance et du Plan MdlSPedlLclSldSedÉÉ. Troisième Enquête Démographique et de Santé au Burundi (2016-2017),. 2017. <https://dhsprogram.com/pubs/pdf/FR335/FR335.pdf> Accessed 22 Nov 2022.
129. National Institute of Statistics DGnFH, and ICF International, 20. Cambodia Demographic and Health Survey , 2014. 2015. <https://dhsprogram.com/pubs/pdf/FR312/FR312.pdf> (accessed Aug 20 2022).
130. Institut National de la Statistique INS, Icf. République du Cameroun Enquête Démographique et de Santé 2018. 2020. <https://www.dhsprogram.com/pubs/pdf/FR360/FR360.pdf> (accessed Aug 5 2022).
131. Statistics Canada. Canadian Health Measures Survey (CHMS): Detailed information for January 2018 to December 2019 (Cycle 6). <https://www23.statcan.gc.ca/imdb/p2SV.pl?Function=getSurvey&SDDS=5071https://www23.statcan.gc.ca/imdb/p2SV.pl?Function=getSurvey&SDDS=5071> (accessed July 5 2022).
132. Institut National de la Statistique d'ÉÉDI, Ministère de la Santé Publique (MSP) et ICF International. Enquête Démographique et de Santé et à Indicateurs Multiples (EDS-MICS 2014-2015). 2016. <https://dhsprogram.com/pubs/pdf/FR317/FR317.pdf> (accessed Jun 14 2022).
133. Department of Epidemiology MoHC. Chile National Health Survey 2016-2017. <http://epi.minsal.cl/encuesta-ens/> (accessed Sep 2 2022).
134. Dongmei Y, Liyun Z, Jian Z, Zhenyu Y, Lichen Y, Jian H, Hongyun F, Qiya G, Xiaoli X, Lahong J, et al. China Nutrition and Health Surveys (1982–2017). *China CDC Weekly*. 2021;3:193-195. doi: 10.46234/ccdcw2021.058
135. Ministerio de Salud y Protección Social y Profamilia. 2017. Colombia Encuesta Nacional de Demografía y Salud 2015. Bogotá, Colombia: Profamilia. <https://dhsprogram.com/publications/publication-fr334-dhs-final-reports.cfm> accessed 22 Nov 2022.
136. International. DGdlSedlPDeIF. Enquête Démographique et de Santé et à Indicateurs Multiples (EDSC-MICS II) 2012. 2014 <https://evaw-global-database.unwomen.org/en/countries/africa/comoros/2012/enquete-demographique-et-de-sante-et-a-indicateurs-multiples-2012> Accessed 22 Nov 2022.
137. International. CNdlSedÉÉoCCel. Enquête Démographique et de Santé du Congo (EDSC-II) 2011-2012 2013. <https://dhsprogram.com/pubs/pdf/FR267/FR267.pdf> (accessed Aug 23 2022).
138. Ecole de Santé Publique de Kishasa Espk/Kinshasa RDdC, Icf. Republique Democratique du Congo Évaluation des Presentations des Services de souns de Santé EPSS 2017-2018. 2019. <http://dhsprogram.com/pubs/pdf/SPA30/SPA30.pdf> (accessed Aug 27 2022).
139. Pan American Health Organization (PAHO). Central America Diabetes Initiative (CAMDI): Survey of Diabetes, Hypertension and Chronic Disease Risk Factors. Belize, San José, San Salvador, Guatemala City, Managua and Tegucigalpa. 2011 <https://www.paho.org/hq/dmdocuments/2012/PAHO-CAMDI-English2-2012.pdf> Accessed 22 Nov 2022.
140. Institut National de la Statistique (INS) et ICF International. Enquête Démographique et de Santé et à Indicateurs Multiples de Côte d'Ivoire 2011-2012. 2012. <https://dhsprogram.com/pubs/pdf/FR272/FR272.pdf> (accessed Aug 17 2022).
141. Börsch-Supan A. Survey of Health, Ageing and Retirement in Europe (SHARE) Wave 8. 2022. <http://www.share-project.org/data-documentation/waves-overview/wave-8.html> (accessed Release version: 8.0.0).

142. Christensen AI, Lau CJ, Kristensen PL, Johnsen SB, Wingstrand A, Friis K, Davidsen M, Andreasen AH. The Danish National Health Survey: Study design, response rate and respondent characteristics in 2010, 2013 and 2017. *Scandinavian Journal of Public Health*. 2020;50:180-188. doi: 10.1177/1403494820966534
143. Centro de Estudios Sociales y Demográficos (CESDEM) y ICF International. Encuesta Demográfica y de Salud 2013. 2014. <https://dhsprogram.com/pubs/pdf/FR292/FR292.pdf> (accessed Sep 2 2022).
144. Ministry of H, Population/Egypt, El Z, Associates/Egypt, International ICF. Egypt Health Issues Survey 2015. 2015. <http://dhsprogram.com/pubs/pdf/FR313/FR313.pdf> (accessed Aug 16 2022).
145. Ministerio de Sanidad y Bienestar Social MdE, Planificación e Inversiones Públicas, e ICF,. Encuesta Demográfica y de Salud (EDSGE-I) 2011. 2012. <https://dhsprogram.com/pubs/pdf/FR271/FR271.pdf> (accessed Sep 4 2022).
146. Ruuge M SD. Eesti Terviseuuring 2019. Metoodika ülevaade. 2022. [https://statistika.tai.ee/Resources/PX/Databases/Andmebaas/05Uuringud/01ETeU/09Alkohol/ETUinfo\\_en.htm](https://statistika.tai.ee/Resources/PX/Databases/Andmebaas/05Uuringud/01ETeU/09Alkohol/ETUinfo_en.htm) (accessed Aug 10 2022).
147. Ethiopian Public Health Institute E, Federal Ministry of Health F, Icf. Ethiopia Mini Demographic and Health Survey 2019. 2021. <https://www.dhsprogram.com/pubs/pdf/FR363/FR363.pdf> (accessed Aug 27 2022).
148. Public Health Unit FIG. Falkland Islands Health and Lifestyle Survey 2019. 2019. <https://www.falklands.gov.fk/publichealth/component/jdownloads/?task=download.send&id=58&catid=4&m=0&Itemid=101> (accessed Aug 8 2022).
149. Eurostat. European Health Interview Survey (EHIS): Eurostat metadata. [https://ec.europa.eu/eurostat/cache/metadata/en/hlth\\_det\\_esms.htm#:~:text=EHIS%20wave%203%20\(2019%20round,\(for%20instance%2C%20Albania\)](https://ec.europa.eu/eurostat/cache/metadata/en/hlth_det_esms.htm#:~:text=EHIS%20wave%203%20(2019%20round,(for%20instance%2C%20Albania)). Accessed July 7.
150. National Institute for Health and Welfare. FinHealth 2017 Study. 2017. <https://thl.fi/documents/10531/3194911/Health+Profile+FinHealth+2017.pdf/a1dadfbc-8256-4187-b5c5-05d6c5d3cba3> (accessed Aug 19 2022).
151. Direction Générale de la Statistique (DGS) et ICF International. Enquête Démographique et de Santé du Gabon 2012. 2013. <https://dhsprogram.com/pubs/pdf/FR276/FR276.pdf>.
152. Gambia Bureau of Statistics (GBoS) and ICF. The Gambia Demographic and Health Survey 2019-20. 2021. <https://dhsprogram.com/pubs/pdf/FR369/FR369.pdf> (accessed Aug 17 2022).
153. Ghana Statistical Service GSS, Ghana Health Service GHS, International ICF. Ghana Demographic and Health Survey 2014. 2015. <http://dhsprogram.com/pubs/pdf/FR307/FR307.pdf> (accessed Aug 27 2022).
154. Hellenic Statistical Authority. Health Survey: 2019. 18 Dec 2020 2020. <https://www.statistics.gr/en/statistics/-/publication/SHE22/-> (accessed Aug 24 2022).
155. Ministerio de Sanidad y Bienestar Social MdE, Planificación e Inversiones Públicas, e ICF International., Centre Nationale de la Statistique et des Études Économiques (CNSEE) [Congo] et ICF,. Encuesta Demográfica y de Salud (EDSGE-I) 2011. Calverton, Maryland, USA, 2012. <https://dhsprogram.com/pubs/pdf/FR271/FR271.pdf> (Accessed 12 September, 2022).
156. Institut Haïtien de l'Enfance (IHE) et ICF. Enquête Mortalité, Morbidité et Utilisation des Services (EMMUS-VI 2016-2017). 2018. <https://dhsprogram.com/pubs/pdf/FR326/FR326.pdf> (accessed Aug 15 2022).
157. Secretaría de Salud SSH, Instituto Nacional de Estadística INEH, International ICF. Honduras Encuesta Nacional de Salud y Demografía 2011-2012. 2013. <http://dhsprogram.com/pubs/pdf/FR274/FR274.pdf> (accessed Aug 10 2022).
158. Centre for Health Protection DoH. Population Health Survey 2020. <https://www.chp.gov.hk/en/features/37474.html> (accessed 6 July 2022).



159. Börsch-Supan A. Survey of Health, Ageing and Retirement in Europe (SHARE) Wave 8. <http://www.share-project.org/data-documentation/waves-overview/wave-8.html>. 2022. Accessed Release version: 8.0.0.
160. International Institute for Population Sciences II, Icf. India national family health survey NFHS-5 2019-21. 2022. <https://www.dhsprogram.com/pubs/pdf/FR375/FR375.pdf> (accessed Jul 17 2022).
161. National Population and Family Planning Board (BKKBN) SIB, Ministry of Health (Kemenkes), and ICF. Indonesia Demographic and Health Survey 2017. . 2017. <https://dhsprogram.com/pubs/pdf/FR342/FR342.pdf> (accessed Aug 4 2022).
162. Healthy Ireland & Department of Health. 2021. Healthy Ireland Survey 2021. <https://www.gov.ie/en/publication/9ef45-the-healthy-ireland-survey-2021/> (accessed Aug 25 2022).
163. Ministry of Health. INHIS - The Israeli National Health Interview Survey. 2016. [https://www.health.gov.il/English/MinistryUnits/ICDC/Health\\_Surveys/Pages/INHIS.aspx](https://www.health.gov.il/English/MinistryUnits/ICDC/Health_Surveys/Pages/INHIS.aspx).
164. Ministry of Health and Wellness (Jamaica). Jamaica Health and lifestyle Survey III (2016-2017). 2018. <https://www.moh.gov.jm/wp-content/uploads/2018/09/Jamaica-Health-and-Lifestyle-Survey-III-2016-2017.pdf> Accessed 22 Nov 2022.
165. National Institute of Health and Nutrition. National Health and Nutrition Survey. <https://www.cdc.gov/nchs/nhanes/index.htm> Accessed 22 Nov 2022.
166. World Health Organization (WHO). Kazakhstan - Aktobe Oblast STEPS Noncommunicable Disease Risk Factors Survey 2016. file:///C:/Users/muideeno/Downloads/WHO-EURO-2019-3643-43402-60941-eng%20(1).pdf (accessed Sep 4 2022).
167. Oh K, Kim Y, Kweon S, Kim S, Yun S, Park S, Lee YK, Kim Y, Park O, Jeong EK. Korea National Health and Nutrition Examination Survey, 20th anniversary: accomplishments and future directions. *Epidemiol Health*. 2021;43:e2021025. doi: 10.4178/epih.e2021025
168. Ministry of Health/Lao PDR, Lao Statistics Bureau LSB, Icf. Lao People's Democratic Republic MICS, 2017 - Lao Social Indicator Survey II 2017 MICS. 2018. <http://dhsprogram.com/pubs/pdf/FR356/FR356.pdf> (accessed Sep 2 2022).
169. Ministry of Health [Lesotho] and ICF International. Lesotho Demographic and Health Survey 2014 . 2016. <https://dhsprogram.com/pubs/pdf/FR309/FR309.pdf> (accessed Aug 19 2022).
170. Liberia Institute of Statistics and Geo-Information Services (LISGIS) MoHL, and ICF,. Liberia Demographic and Health Survey 2019-20. 2021. <https://dhsprogram.com/pubs/pdf/FR362/FR362.pdf> (accessed Aug 2 2022).
171. Institut National de la Statistique (INSTAT) et ICF. Enquête Démographique et de Santé à Madagascar,2021. 2022. <https://dhsprogram.com/pubs/pdf/FR376/FR376.pdf> (accessed Aug 5 2022).
172. Department of Statistics (Malaysia) IfPH, Ministry of Health (Malaysia), Ministry of Health (Malaysia),. Malaysia National Health and Morbidity Survey 2019. <https://iku.moh.gov.my/nhms> (accessed Aug 22 2022).
173. Ministry of Health (MOH) [Maldives] and ICF. Maldives Demographic and Health Survey 2016-17. 2018. <https://dhsprogram.com/pubs/pdf/FR349/FR349.pdf> (accessed Aug 18 2022).
174. Institut National de la Statistique (INSTAT) CdPedSSS-DSePdIFCS-D-PeI. Enquête Démographique et de Santé au Mali 2018. 2019. <https://dhsprogram.com/pubs/pdf/FR358/FR358.pdf> (accessed Jul 28 2022).
175. Office Nationale de la Statistique (ONS) mdISM, et ICF,. Enquête Démographique et de Santé en Mauritanie 2019-2021. 2021. <https://dhsprogram.com/pubs/pdf/FR373/FR373.pdf> (accessed Aug 5 2022).
176. Ministry of Health and Quality of Life BIHDI, Melbourne, Australia,. The Trends in Diabetes and Cardiovascular Disease Risk in Mauritius. The Mauritius Non Communicable Diseases Survey 2015.

- <https://health.govmu.org/Documents/Statistics/Documents/Mauritius%20NCD%20Survey%202015%20Report.pdf> Accessed 22 Nov 2022.
177. Ministry of Health (Mexico) NIOPHM. Mexico National Survey of Health and Nutrition Midway 2016. <https://ensanut.insp.mx/encuestas/ensanut2016/index.php> Accessed 22 Nov 2022.
  178. Ministry of Health and Sports (MoHS) and ICF. Myanmar Demographic and Health Survey 2015-16. 2017. <https://dhsprogram.com/pubs/pdf/FR324/FR324.pdf> (accessed Aug 19 2022).
  179. The Namibia Ministry of Health and Social Services - MoHSS - and ICF International. 2014. The Namibia Demographic and Health Survey 2013. Windhoek, Namibia: MoHSS/Namibia and ICF International. <https://dhsprogram.com/publications/publication-fr298-dhs-final-reports.cfm> Accessed 22 Nov 2022.
  180. Manatū Hauora Ministry of Health. Annual Update of Key Results 2020/21: New Zealand Health Survey. <https://www.health.govt.nz/publication/annual-update-key-results-2020-21-new-zealand-health-survey> Accessed 22 Nov 2022.
  181. National Population Commission NPC, Icf. Nigeria Demographic and Health Survey 2018 - Final Report. 2019. <http://dhsprogram.com/pubs/pdf/FR359/FR359.pdf> (accessed Aug 4 2022).
  182. Institute of Public Health (Macedonia) UM. Macedonia National Nutrition Survey 2011. <https://apps.who.int/iris/handle/10665/108377> (accessed Aug 7 2022).
  183. Statistics Norway. Norway Survey of Living Conditions on Health 2019. <https://www.ssb.no/statbank/list/helseforhold> (accessed Aug 17 2022).
  184. National Institute of Population Studies N. Pakistan Maternal Mortality Survey. 2020. <https://www.dhsprogram.com/pubs/pdf/FR366/FR366.pdf> (accessed Aug 20 2022).
  185. Census and Statistics Directorate (Panama) MoEaFP, World Bank,. Panama Living Standard Measurement Survey 2003. <https://microdata.worldbank.org/index.php/catalog/2346> Accessed 22 Nov 2022.
  186. National Statistical Office -NSO/Papua New Guinea and ICF. 2019. Papua New Guinea Demographic and Health Survey 2016-18. Port Moresby, Papua New Guinea, and Rockville, Maryland, USA: NSO and ICF. <https://www.dhsprogram.com/publications/publication-fr364-dhs-final-reports.cfm> Accessed 22 Nov 2022.
  187. National Institute of Statistics and Informatics (Peru). Peru Demographic and Family Health Survey 2020. <http://inei.inei.gob.pe/microdatos/> (accessed July 10 2022).
  188. Philippine Statistics Authority (PSA) and ICF. Philippines National Demographic and Health Survey 2017. 2018. <https://dhsprogram.com/pubs/pdf/FR347/FR347.pdf> (accessed Aug 6 2022).
  189. Centre for Disease Control and Prevention (CDC). Behavioral Risk Factor Surveillance System (BRFSS). 2022. [https://www.cdc.gov/brfss/annual\\_data/2021/pdf/Overview\\_2021-508.pdf](https://www.cdc.gov/brfss/annual_data/2021/pdf/Overview_2021-508.pdf).
  190. RLMS-HSE (2020) Russian longitudinal monitoring survey. Russian Longitudinal Monitoring Survey. <https://rlms-hse.cpc.unc.edu/> (accessed 6 July 2022).
  191. National Institute of Statistics of Rwanda (NISR) [Rwanda] MoHMR, and ICF,. Rwanda Demographic and Health Survey 2019-20 Final Report. 2021. <https://dhsprogram.com/pubs/pdf/FR370/FR370.pdf> (accessed Aug 20 2022).
  192. Instituto Nacional de Estatística - INE/São Tomé e Príncipe, Ministério da Saúde, and ICF Macro. 2010. Inquérito Demográfico e Sanitário, São Tomé e Príncipe, IDS STP, 2008-2009. Calverton, Maryland, USA: INE/São Tomé. <https://dhsprogram.com/publications/publication-fr233-dhs-final-reports.cfm> Accessed 22 Nov 2022.
  193. Ministry of Health. World Health Survey Saudi Arabia 2019. 2019. <https://www.moh.gov.sa/en/Ministry/Statistics/Population-Health-Indicators/Documents/World-Health-Survey-Saudi-Arabia.pdf> (accessed Aug 16 2022).

194. Agence Nationale de la Statistique et de la Démographie (ANSD) [Sénégal] et. Sénégal : Enquête Démographique et de Santé Continue (EDS-Continue 2019). 2019. <https://dhsprogram.com/pubs/pdf/FR368/FR368.pdf> Accessed 22 Nov 2022.
195. Institute of Public Health of Serbia MoHS. Serbia National Health Survey 2019. <https://www.stat.gov.rs/en-us/vesti/20210429-istravanje-zdravlja-stan/> (accessed Aug 23 2022).
196. Statistics Sierra Leone (Stats SL) and ICF. Sierra Leone Demographic and Health Survey 2019. 2020. <https://dhsprogram.com/pubs/pdf/FR365/FR365.pdf> (accessed Sep 11 2022).
197. Ministry of Health (Singapore). National Population Health Survey 2020. <https://www.hpb.gov.sg/workplace/workplace-programmes/useful-information-for-organisations/national-reports-and-surveys> (accessed Aug 18 2022).
198. National Department of Health, Icf. South Africa Demographic and Health Survey 2016. 2019. <http://dhsprogram.com/pubs/pdf/FR337/FR337.pdf> (accessed Aug 19 2022).
199. DHS Program. Sri Lanka: Standard DHS, 2016. [https://dhsprogram.com/Countries/Country-Main.cfm?ctry\\_id=37&c=Sri%20Lanka](https://dhsprogram.com/Countries/Country-Main.cfm?ctry_id=37&c=Sri%20Lanka) Accessed 22 Nov 2022.
200. Federal statistical Office S. The Swiss Health Survey (2017); health and gender. 2017. [https://ec.europa.eu/eurostat/cros/content/swiss-health-survey-shs\\_en](https://ec.europa.eu/eurostat/cros/content/swiss-health-survey-shs_en) (accessed 12 September, 2022).
201. Ministry of Health and Welfare. National Health Interview Survey (NHIS). <https://www.hpa.gov.tw/EngPages/Detail.aspx?nodeid=1077&pid=6198> (accessed Jul 7 2022).
202. Statistical Agency under the President of the Republic of Tajikistan MoHaSPoPotRoT, and ICF,. Tajikistan Demographic and Health Survey 2017. 2018. <https://dhsprogram.com/pubs/pdf/FR341/FR341.pdf> (accessed Aug 13 2022).
203. Siwarom S, Aekplakorn W, Pirojsakul K, Paksi W, Kessomboon P, Neelapaichit N, Chariyalertsak S, Assanangkornchai S, Taneepanichskul S. Metabolic syndrome in Thai adolescents and associated factors: the Thai National Health Examination Survey V (NHES V). *BMC Public Health*. 2021;21:678. doi: 10.1186/s12889-021-10728-6
204. Ministère de la Planification dDedAdTM, Ministère de la Santé (MS) et ICF International,. Enquête Démographique et de Santé au Togo 2013-2014 2015. <https://dhsprogram.com/pubs/pdf/FR301/FR301.pdf> (accessed Jul 21 2022).
205. Aloui T, Ayed M, Fourati H. Enquête Démographique et de Santé en Tunisie 1988. Office National de la Famille et de la Population Direction de la Population/Tunisie and Institute for Resource Development/Macro Systems. <http://dhsprogram.com/pubs/pdf/FR40/FR40.pdf>. 1989.
206. National Center for Health Statistics. National Health Interview Survey 2022. <https://www.cdc.gov/nchs/nhis/2022nhis.htm> Accessed 22 Nov 2022.
207. National Health Service. Health Survey for England - Health, social care and lifestyles <https://digital.nhs.uk/data-and-information/areas-of-interest/public-health/health-survey-for-england---health-social-care-and-lifestyles#data-collected> Accessed 22 Nov 2022.
208. Public Health Information & Research Branch IAD, Department of Health, . Health survey (NI) First Results 2020/21. <https://www.health-ni.gov.uk/sites/default/files/publications/health/hsni-first-results-20-21.pdf> (accessed Aug 7 2022).
209. Scottish Government & ScotCen Social Research. The Scottish Health Survey 2020 edition-telephone survey 2020. <https://natcen.ac.uk/our-research/research/scottish-health-survey/> (accessed Aug 9 2022).
210. National Institute of Statistics (Uruguay). Uruguay Continuous Household Survey 2016. 2016 [https://ghdx.healthdata.org/organizations/national-institute-statistics-uruguay?qt-organization\\_records=3](https://ghdx.healthdata.org/organizations/national-institute-statistics-uruguay?qt-organization_records=3) (accessed Aug 20 2022).



211. Ministry of Public Health and Population (MOPHP) CSOCY, Pan Arab Program for Family Health (PAPFA M), and ICF International,. Yemen National Health and Demographic Survey 2013. 2015. <https://dhsprogram.com/pubs/pdf/FR296/FR296.pdf> (accessed Aug 19 2022).
212. Zambia Statistics Agency MoHMZ, and ICF,. Zambia Demographic and Health Survey 2018. 2019. <https://dhsprogram.com/pubs/pdf/FR361/FR361.pdf> (accessed Sep 7 2022).
213. International ZNSAal. Zimbabwe Demographic and Health Survey 2015: Final Report. 2016. <https://dhsprogram.com/pubs/pdf/FR322/FR322.pdf> (accessed Jul 14 2022).
214. WHO report on the global tobacco epidemic, 2015: raising taxes on tobacco. World Health Organization, Geneva. In: Geneva: World Health Organization; 2015.
215. United Nations General Assembly, Seventy-second session. Progress on the prevention and control of non-communicable diseases. Report of the Secretary-General. 21 December 2017. A/72/662  
[https://ncdalliance.org/sites/default/files/resource\\_files/UNSG%20Report%20on%20NCDs%20December%202017%20A.72.662%20SG%20report.pdf](https://ncdalliance.org/sites/default/files/resource_files/UNSG%20Report%20on%20NCDs%20December%202017%20A.72.662%20SG%20report.pdf) Accessed on 9 March 2018.
216. Pearson TA, Palaniappan LP, Artinian NT, Carnethon MR, Criqui MH, Daniels SR, Fonarow GC, Fortmann SP, Franklin BA, Galloway JM, et al. American Heart Association Guide for Improving Cardiovascular Health at the Community Level, 2013 update: a scientific statement for public health practitioners, healthcare providers, and health policy makers. *Circulation*. 2013;127:1730-1753. doi: 10.1161/CIR.0b013e31828f8a94
217. Goodchild M, Perucic A-M, Nargis N. Modelling the impact of raising tobacco taxes on public health and finance. *Bulletin of the World Health Organization*. 2016;94:250-257. doi: 10.2471/BLT.15.164707
218. Hopkins DP, Briss PA, Ricard CJ, Husten CG, Carande-Kulis VG, Fielding JE, Alao MO, McKenna JW, Sharp DJ, Harris JR, et al. Reviews of evidence regarding interventions to reduce tobacco use and exposure to environmental tobacco smoke. *American Journal of Preventive Medicine*. 2001;20:16-66.
219. Asaria P, Chisholm D, Mathers C, Ezzati M, Beaglehole R. Chronic disease prevention: health effects and financial costs of strategies to reduce salt intake and control tobacco use. *Lancet*. 2007;370:2044-2053.
220. Wilson N. Salt tax could reduce population's salt intake. *British Medical Journal*. 2004;329:918.
221. Chaloupka FJ, Grossman M, Saffer H. The effects of price on alcohol consumption and alcohol-related problems. *Alcohol Research and Health*. 2002;26:22-34.
222. Delcher C, Maldonado-Molina MM, Wagenaar AC. Effects of alcohol taxes on alcohol-related disease mortality in New York State from 1969 to 2006. *Addictive Behaviors*. 2012;37:783-789. doi: 10.1016/j.addbeh.2012.02.019
223. Elder RW, Lawrence B, Ferguson A, Naimi TS, Brewer RD, Chattopadhyay SK, Toomey TL, Fielding JE, Task Force on Community Preventive S. The effectiveness of tax policy interventions for reducing excessive alcohol consumption and related harms. *American Journal of Preventive Medicine*. 2010;38:217-229. doi: 10.1016/j.amepre.2009.11.005
224. Meier PS, Holmes J, Angus C, Ally AK, Meng Y, Brennan A. Estimated Effects of Different Alcohol Taxation and Price Policies on Health Inequalities: A Mathematical Modelling Study. *PLoS Medicine*. 2016;13. doi: 10.1371/journal.pmed.1001963
225. Wagenaar AC, Tobler AL, Komro KA. Effects of alcohol tax and price policies on morbidity and mortality: A systematic review. *American Journal of Public Health*. 2010;100:2270-2278. doi: 10.2105/AJPH.2009.186007
226. Miura K. Epidemiology and prevention of hypertension in Japanese: How could Japan get longevity? *EPMA Journal*. 2011;2:59-64. doi: 10.1007/s13167-011-0069-y
227. Puska P. Successful prevention of non-communicable diseases: 25 year experiences with North Karelia Project in Finland. *Public Health Med*. 2001;4:  
<https://www.julkari.fi/handle/10024/87423>.

228. Record NB, Onion DK, Prior RE, Dixon DC, Record SS, Fowler FL, Cayer GR, Amos CI, Pearson TA. Community-wide cardiovascular disease prevention programs and health outcomes in a rural county, 1970-2010. *JAMA - Journal of the American Medical Association*. 2015;313:147-155. doi: 10.1001/jama.2014.16969
229. Bertram MY, Sweeny K, Lauer JA, Chisholm D, Sheehan P, Rasmussen B, Upreti SR, Dixit LP, George K, Deane S. Investing in non-communicable diseases: an estimation of the return on investment for prevention and treatment services. *Lancet*. 2018;391:2071-2078. doi: 10.1016/s0140-6736(18)30665-2
230. World Health Organization. Saving lives, spending less: a strategic response to noncommunicable diseases. Geneva, Switzerland 2018 (WHO/NMH/NVI/18.8). Licence: CC BY-NC-SA 3.0 IGO. <https://www.who.int/ncds/management/ncds-strategic-response/en/> Accessed 10 July 2019.
231. Joseph P, Roshandel G, Gao P, Pais P, Lonn E, Xavier D, Avezum A, Zhu J, Liu L, Sliwa K, et al. Fixed-dose combination therapies with and without aspirin for primary prevention of cardiovascular disease: an individual participant data meta-analysis. *The Lancet*. 2021;398:1133-1146. doi: 10.1016/S0140-6736(21)01827-4
232. Grundy Scott M, Stone Neil J, Bailey Alison L, Beam C, Birtcher Kim K, Blumenthal Roger S, Braun Lynne T, de Ferranti S, Faiella-Tommasino J, Forman Daniel E, et al. 2018 AHA/ACC/AACVPR/AAPA/ABC/ACPM/ADA/AGS/APhA/ASPC/NLA/PCNA Guideline on the Management of Blood Cholesterol: A Report of the American College of Cardiology/American Heart Association Task Force on Clinical Practice Guidelines. *Circulation*. 2019;139:e1082-e1143. doi: 10.1161/CIR.0000000000000625
233. Guideline for the pharmacological treatment of hypertension in adults. Geneva: World Health Organization; 2021. Licence: CC BY-NC-SA 3.0 IGO <https://apps.who.int/iris/bitstream/handle/10665/344424/9789240033986-eng.pdf> Accessed 10 Oct 2022.
234. Kleindorfer DO, Towfighi A, Chaturvedi S, Cockcroft KM, Gutierrez J, Lombardi-Hill D, Kamel H, Kernan WN, Kittner SJ, Leira EC, et al. 2021 Guideline for the prevention of stroke in patients with stroke and transient ischemic attack; A guideline from the American Heart Association/American Stroke Association. *Stroke*. 2021:E364-E467. doi: 10.1161/STR.0000000000000375
235. Whelton PK, Carey RM, Aronow WS, Casey DE, Jr., Collins KJ, Dennison Himmelfarb C, DePalma SM, Gidding S, Jamerson KA, Jones DW, et al. 2017 ACC/AHA/AAPA/ABC/ACPM/AGS/APhA/ASH/ASPC/NMA/PCNA Guideline for the Prevention, Detection, Evaluation, and Management of High Blood Pressure in Adults: Executive Summary: A Report of the American College of Cardiology/American Heart Association Task Force on Clinical Practice Guidelines. *Circulation*. 2018;138:e426-e483. doi: 10.1161/CIR.0000000000000597
236. Cadilhac DA, Carter R, Thrift AG, Dewey HM. Organized Blood Pressure Control Programs to Prevent Stroke in Australia. *Stroke*. 2012;43:1370-1375. doi: doi:10.1161/STROKEAHA.111.634949
237. Arnett DK, Blumenthal RS, Albert MA, Buroker AB, Goldberger ZD, Hahn EJ, Himmelfarb CD, Khera A, Lloyd-Jones D, McEvoy JW, et al. 2019 ACC/AHA Guideline on the Primary Prevention of Cardiovascular Disease: Executive Summary: A Report of the American College of Cardiology/American Heart Association Task Force on Clinical Practice Guidelines. *Circulation*. 2019;140:e563-e595. doi: 10.1161/CIR.0000000000000677
238. World Health Organization. One Health. September 2017 <https://www.who.int/features/qa/one-health/en/> Accessed 16 August 2019.
239. Meschia JF, Bushnell C, Boden-Albala B, Braun LT, Bravata DM, Chaturvedi S, Creager MA, Eckel RH, Elkind MSV, Fornage M, et al. Guidelines for the primary prevention of stroke: A

- statement for healthcare professionals from the American Heart Association/American Stroke Association. *Stroke*. 2014;45:3754-3832. doi: 10.1161/STR.0000000000000046
240. O'Donnell MJ, Chin SL, Rangarajan S, Xavier D, Liu L, Zhang H, Rao-Melacini P, Zhang X, Pais P, Agapay S, et al. Global and regional effects of potentially modifiable risk factors associated with acute stroke in 32 countries (INTERSTROKE): a case-control study. *Lancet*. 2016;388:761-775. doi: 10.1016/s0140-6736(16)30506-2
241. Feigin VL, Roth GA, Naghavi M, Parmar P, Krishnamurthi R, Chugh S, Mensah GA, Norrving B, Shiue I, Ng M, et al. Global burden of stroke and risk factors in 188 countries, during 1990-2013: a systematic analysis for the Global Burden of Disease Study 2013. *The Lancet Neurology*. 2016;15:913-924. doi: 10.1016/S1474-4422(16)30073-4
242. D'Agostino RB, Wolf PA, Belanger AJ, Kannel WB. Stroke risk profile: adjustment for antihypertensive medication. The Framingham Study. *Stroke*. 1994;25:40-43.
243. Wolf PA, D'Agostino RB, Belanger AJ, Kannel WB. Probability of stroke: A risk profile from the Framingham Study. *Stroke*. 1991;22:312-318.
244. Driving Sustainable action for Circulatory Health. White Paper on Circulatory Health. Geneva, Switzerland. Global Coalition for Circulatory Health. 2018. <https://world-heart-federation.org/resource/white-paper-for-circulatory-health/> Accessed 24 November 2021.
245. Piepoli MF, Hoes AW, Agewall S, Albus C, Brotons C, Catapano AL, Cooney M-T, Corrà U, Cosyns B, Deaton C, et al. 2016 European Guidelines on cardiovascular disease prevention in clinical practice: The Sixth Joint Task Force of the European Society of Cardiology and Other Societies on Cardiovascular Disease Prevention in Clinical Practice (constituted by representatives of 10 societies and by invited experts) Developed with the special contribution of the European Association for Cardiovascular Prevention & Rehabilitation (EACPR). *European Heart Journal*. 2016;37:2315-2381. doi: 10.1093/eurheartj/ehw106
246. Kernan WN, Ovbiagele B, Black HR, Bravata DM, Chimowitz MI, Ezekowitz MD, Fang MC, Fisher M, Furie KL, Heck DV, et al. Guidelines for the prevention of stroke in patients with stroke and transient ischemic attack: A guideline for healthcare professionals from the American Heart Association/American Stroke Association. *Stroke*. 2014;45:2160-2236. doi: 10.1161/STR.0000000000000024
247. Roshandel G, Khoshnia M, Poustchi H, Hemming K, Kamangar F, Gharavi A, Ostovaneh MR, Nateghi A, Majed M, Navabakhsh B, et al. Effectiveness of polypill for primary and secondary prevention of cardiovascular diseases (PolyIran): a pragmatic, cluster-randomised trial. *The Lancet*. 2019;394:672-683. doi: 10.1016/S0140-6736(19)31791-X
248. Muñoz D, Uzoije P, Reynolds C, Miller R, Walkley D, Pappalardo S, Tousey P, Munro H, Gonzales H, Song W, et al. Polypill for Cardiovascular Disease Prevention in an Underserved Population. *New Engl J Med*. 2019;381:1114-1123. doi: 10.1056/NEJMoa1815359
249. Amarenco P, Labreuche J. Lipid management in the prevention of stroke: review and updated meta-analysis of statins for stroke prevention. *The Lancet Neurology*. 2009;8:453-463. doi: 10.1016/S1474-4422(09)70058-4
250. Baigent C, Blackwell L, Collins R, Emberson J, Godwin J, Peto R, Buring J, Hennekens C, Kearney P, Meade T, et al. Aspirin in the primary and secondary prevention of vascular disease: collaborative meta-analysis of individual participant data from randomised trials. *Lancet*. 2009;373:1849-1860. doi: 10.1016/s0140-6736(09)60503-1
251. Baigent C, Blackwell L, Emberson J, Holland LE, Reith C, Bhala N, Peto R, Barnes EH, Keech A, Simes J, et al. Efficacy and safety of more intensive lowering of LDL cholesterol: a meta-analysis of data from 170,000 participants in 26 randomised trials. *Lancet*. 2010;376:1670-1681. doi: 10.1016/s0140-6736(10)61350-5
252. Committee CS. A randomised, blinded, trial of clopidogrel versus aspirin in patients at risk of ischaemic events (CAPRIE). *Lancet*. 1996;348:1329-1339.

253. Law MR, Morris JK, Wald NJ. Use of blood pressure lowering drugs in the prevention of cardiovascular disease: Meta-analysis of 147 randomised trials in the context of expectations from prospective epidemiological studies. *BMJ (Online)*. 2009;338:1245. doi: 10.1136/bmj.b1665
254. Minhas JS, Chithiramohan T, Wang X, Barnes SC, Clough RH, Kadicheeni M, Beishon LC, Robinson T. Oral antiplatelet therapy for acute ischaemic stroke. *Cochrane Database of Systematic Reviews*. 2022:Art. No.: CD000029.
255. Mortensen MB, Tybjærg-Hansen A, Nordestgaard BG. Statin Eligibility for Primary Prevention of Cardiovascular Disease According to 2021 European Prevention Guidelines Compared With Other International Guidelines. *JAMA Cardiol*. 2022;7:836-843. doi: 10.1001/jamacardio.2022.1876
256. Paciaroni M, Agnelli G, Micheli S, Caso V. Efficacy and Safety of Anticoagulant Treatment in Acute Cardioembolic Stroke. *Stroke*. 2007;38:423-430. doi: doi:10.1161/01.STR.0000254600.92975.1f
257. Sandercock PA, Counsell C, Kane EJ. Anticoagulants for acute ischaemic stroke. *The Cochrane database of systematic reviews*. 2015;2015:CD000024. doi: 10.1002/14651858.CD000024.pub4
258. Saxena R, Koudstaal PJ. Anticoagulants for preventing stroke in patients with nonrheumatic atrial fibrillation and a history of stroke or transient ischaemic attack. *Cochrane Database of Systematic Reviews*. 2004:CD000185.
259. Verro P, Gorelick PB, Nguyen D. Aspirin Plus Dipyridamole Versus Aspirin for Prevention of Vascular Events After Stroke or TIA. *Stroke*. 2008;39:1358-1363. doi: doi:10.1161/STROKEAHA.107.496281
260. Whiteley WN, Adams HP, Jr., Bath PM, Berge E, Sandset PM, Dennis M, Murray GD, Wong KS, Sandercock PA. Targeted use of heparin, heparinoids, or low-molecular-weight heparin to improve outcome after acute ischaemic stroke: an individual patient data meta-analysis of randomised controlled trials. *The Lancet Neurology*. 2013;12:539-545. doi: 10.1016/s1474-4422(13)70079-6
261. Diener H-C, Hankey GJ, Easton JD, Lip GYH, Hart RG, Caso V. Non-vitamin K oral anticoagulants for secondary stroke prevention in patients with atrial fibrillation. *Eur Heart J Suppl*. 2020;22:113-121. doi: 10.1093/eurheartj/suaa104
262. Cahill K, Stevens S, Perera R, Lancaster T. Pharmacological interventions for smoking cessation: an overview and network meta-analysis. *The Cochrane database of systematic reviews*. 2013;2013:CD009329. doi: 10.1002/14651858.CD009329.pub2
263. Kim J, Gall SL, Dewey HM, Macdonell RA, Sturm JW, Thrift AG. Baseline smoking status and the long-term risk of death or nonfatal vascular event in people with stroke: a 10-year survival analysis. *Stroke*. 2012;43:3173-3178. doi: 10.1161/strokeaha.112.668905
264. Spence JD. Nutrition and Risk of Stroke. *Nutrients*. 2019;11:647. doi: 10.3390/nu11030647
265. O'Donnell MJ, Xavier D, Liu L, Zhang H, Chin SL, Rao-Melacini P, Rangarajan S, Islam S, Pais P, McQueen MJ, et al. Risk factors for ischaemic and intracerebral haemorrhagic stroke in 22 countries (the INTERSTROKE study): a case-control study. *The Lancet*. 2010;376:112-123.
266. Neal B, Wu Y, Feng X, Zhang R, Zhang Y, Shi J, Zhang J, Tian M, Huang L, Li Z, et al. Effect of Salt Substitution on Cardiovascular Events and Death. *New Engl J Med*. 2021;385:1067-1077. doi: 10.1056/NEJMoa2105675
267. Bond DS, Thomas JG, Raynor HA, Moon J, Sieling J, Trautvetter J, Leblond T, Wing RR. B-MOBILE - A smartphone-based intervention to reduce sedentary time in overweight/obese individuals: A within-subjects experimental trial. *PLoS ONE*. 2014;9. doi: 10.1371/journal.pone.0100821
268. Feigin VL, Norrving B, Mensah GA. Primary prevention of cardiovascular disease through population-wide motivational strategies: insights from using smartphones in stroke

- prevention. *BMJ Global Health*. 2017 Apr 4;2:DOI: 10.1136/bmjgh-2017-000306 doi: 10.1136/bmjgh-2017-000306
269. Glynn LG, Hayes PS, Casey M, Glynn F, Alvarez-Iglesias A, Newell J, Ólaighin G, Heaney D, O'Donnell M, Murphy AW. Effectiveness of a smartphone application to promote physical activity in primary care: The SMART MOVE randomised controlled trial. *British Journal of General Practice*. 2014;64:e384-e391. doi: 10.3399/bjgp14X680461
270. Spring B, Schneider K, McFadden HG, Vaughn J, Kozak AT, Smith M, Moller AC, Epstein LH, DeMott A, Hedeker D, et al. Multiple behavior changes in diet and activity: A randomized controlled trial using mobile technology. *Arch Intern Med*. 2012;172:789-796. doi: 10.1001/archinternmed.2012.1044
271. Wardlaw JM, Bath PM. Stroke research in 2018: extended time windows, refined benefit, and lifestyle prevention targets. *The Lancet Neurology*. 2019;18:2-3. doi: 10.1016/S1474-4422(18)30457-5
272. Feigin VL, Owolabi M, Hankey GJ, Pandian JD, Martins SC. Digital health in primordial and primary stroke prevention: a systematic review. *Stroke*. 2022;53:1008–1019.
273. Wolters FJ, Paul NL, Li L, Rothwell PM. Sustained impact of UK FAST-test public education on response to stroke: a population-based time-series study. *International journal of stroke : official journal of the International Stroke Society*. 2015;10:1108-1114. doi: 10.1111/ijss.12484
274. Lehtisalo J, Rusanen M, Solomon A, Antikainen R, Laatikainen T, Peltonen M, Strandberg T, Tuomilehto J, Soininen H, Kivipelto M, et al. Effect of a multi-domain lifestyle intervention on cardiovascular risk in older people: the FINGER trial. *European Heart Journal*. 2022;43:2054-2061. doi: 10.1093/eurheartj/ehab922
275. Charlton KE, Corso B, Ware L, Schutte AE, Wepener L, Minicuci N, Naidoo N, Kowal P. Effect of South Africa's interim mandatory salt reduction programme on urinary sodium excretion and blood pressure. *Preventive Medicine Reports*. 2021;23:101469. doi: <https://doi.org/10.1016/j.pmedr.2021.101469>
276. Greenberg SM, Ziai WC, Cordonnier C, Dowlatabadi D, Francis B, Goldstein JN, Hemphill JC, Johnson R, Keigher KM, Mack WJ, et al. 2022 Guideline for the Management of Patients With Spontaneous Intracerebral Hemorrhage: A Guideline From the American Heart Association/American Stroke Association. *Stroke*. 0:10.1161/STR.0000000000000407. doi: doi:10.1161/STR.0000000000000407
277. Cluster WHOND, Mental H. *WHO STEPS stroke manual : the WHO STEPwise approach to stroke surveillance*. World Health Organization; 2005.
278. Pandian JD, William AG, Kate MP, Norrving B, Mensah GA, Davis S, Roth GA, Thrift AG, Kengne AP, Kissela BM, et al. Strategies to Improve Stroke Care Services in Low- and Middle-Income Countries: A Systematic Review. *Neuroepidemiology*. 2017;49:45-61. doi: 10.1159/000479518
279. Feigin V, Norrving B, Sudlow CLM, Sacco RL. Updated Criteria for Population-Based Stroke and Transient Ischemic Attack Incidence Studies for the 21st Century. *Stroke*. 2018;49:2248-2255. doi: 10.1161/strokeaha.118.022161
280. Feigin VL. Stroke in developing countries: can the epidemic be stopped and outcomes improved? *The Lancet Neurology*. 2007;6:94-97.
281. Mead GE, Sposato LA, Sampaio Silva G, Yperzeele L, Wu S, Kutlubaev M, Cheyne J, Wahab K, Urrutia VC, Sharma VK, et al. A systematic review and synthesis of global stroke guidelines on behalf of the World Stroke Organization. *International journal of stroke : official journal of the International Stroke Society*. 2023;18:499-531. doi: 10.1177/17474930231156753
282. Powers William J, Rabinstein Alejandro A, Ackerson T, Adeoye Opeolu M, Bambakidis Nicholas C, Becker K, Biller J, Brown M, Demaerschalk Bart M, Hoh B, et al. Guidelines for the Early Management of Patients With Acute Ischemic Stroke: 2019 Update to the 2018 Guidelines for the Early Management of Acute Ischemic Stroke: A Guideline for Healthcare

- Professionals From the American Heart Association/American Stroke Association. *Stroke*. 2019;50:e344-e418. doi: 10.1161/STR.0000000000000211
283. Boulanger JM, Lindsay MP, Gubitz G, Smith EE, Stotts G, Foley N, Bhogal S, Boyle K, Braun L, Goddard T, et al. Canadian Stroke Best Practice Recommendations for Acute Stroke Management: Prehospital, Emergency Department, and Acute Inpatient Stroke Care, 6th Edition, Update 2018. *International journal of stroke : official journal of the International Stroke Society*. 2018;13:949-984. doi: 10.1177/1747493018786616
284. Berge E, Whiteley W, Audebert H, De Marchis GM, Fonseca AC, Padiglioni C, de la Ossa NP, Strbian D, Tsvigoulis G, Turc G. European Stroke Organisation (ESO) guidelines on intravenous thrombolysis for acute ischaemic stroke. *Eur Stroke J*. 2021;6:I-lxii. doi: 10.1177/2396987321989865
285. Ma L, Hu X, Song L, Chen X, Ouyang M, Billot L, Li Q, Malavera A, Li X, Muñoz-Venturelli P, et al. The third Intensive Care Bundle with Blood Pressure Reduction in Acute Cerebral Haemorrhage Trial (INTERACT3): an international, stepped wedge cluster randomised controlled trial. *The Lancet*. doi: 10.1016/S0140-6736(23)00806-1
286. Mayberg MR, Batjer HH, Dacey R, Diringer M, Haley EC, Heros RC, Sternau LL, Torner J, Adams HP, Jr., Feinberg W. Guidelines for the management of aneurysmal subarachnoid hemorrhage. A statement for healthcare professionals from a special writing group of the Stroke Council, American Heart Association. *Circulation*. 1994;90:2592-2605.
287. Maher M, Schweizer TA, Macdonald RL. Treatment of Spontaneous Subarachnoid Hemorrhage. *Stroke*. 2020;51:1326-1332. doi: 10.1161/STROKEAHA.119.025997
